# Supplementary material for: c-MYC-Induced AP4 Attenuates DREAM-Mediated Repression by p53
Source: MDPI journal article supplement (doi:10.3390/cancers15041162), 2023-02-11
Supplement: s1 [file s1]

## Supplementary Materials

### Supplementary Figures

**Figure S1:** Original, uncropped Western Blot images.

**Figure S2:** Characterization of the effects of *AP4*- and *p53*-deficiency on basal and c-MYC-induced DNA damage by  $\gamma$ H2AX staining.

**Figure S3:** Characterization of the effects of *AP4*- and *p53*-deficiency on basal and c-MYC-induced DNA damage by Comet assays.

**Figure S4:** Basal and c-MYC-induced formation of micronuclei in *AP4*- and *p53*-deficient cells.

**Figure S5:** Characterization of the effects of *AP4*- and *p53*-deficiency on basal and c-MYC-induced formation of bi-nucleated cells.

**Figure S6:** Clustering of gene expressions with genotype-dependent differences in c-MYC-mediated regulation.

**Figure S7:** Validation of siRNA-mediated depletion of *LIN37* and *p21* by qPCR.

### Supplementary Tables

**Table S1:** Sequence information for guide RNAs used for *AP4* deletion.

**Table S2:** Sequence information for guide *P53* used for *p53* deletion.

**Table S3:** List of Antibodies used.

**Table S4:** Oligonucleotides used for qPCR.

**Table S5:** mRNAs significantly up- or downregulated ( $\geq 1.5$ x fold change) in MCF-7/pRTR-c-MYC cells (*AP4* wild-type/*p53* wild-type).

**Table S6:** mRNAs significantly up- or downregulated ( $\geq 1.5$ x fold change) in MCF-7/pRTR-c-MYC cells (*AP4* KO/*p53* wild-type).

**Table S7:** mRNAs significantly up- or downregulated ( $\geq 1.5$ x fold change) in MCF-7/pRTR-c-MYC cells (*AP4* wild-type/*p53* -/-).

**Table S8:** mRNAs significantly up- or downregulated ( $\geq 1.5$ x fold change) in MCF-7/pRTR-c-MYC cells (*AP4* KO/*p53* -/-).

**Table S9:** 2309 mRNAs with genotype-dependent differences in c-MYC-induced regulation.

**Table S10:** E2F/DREAM targets associated with transcriptional clusters 1, 2 and 3.

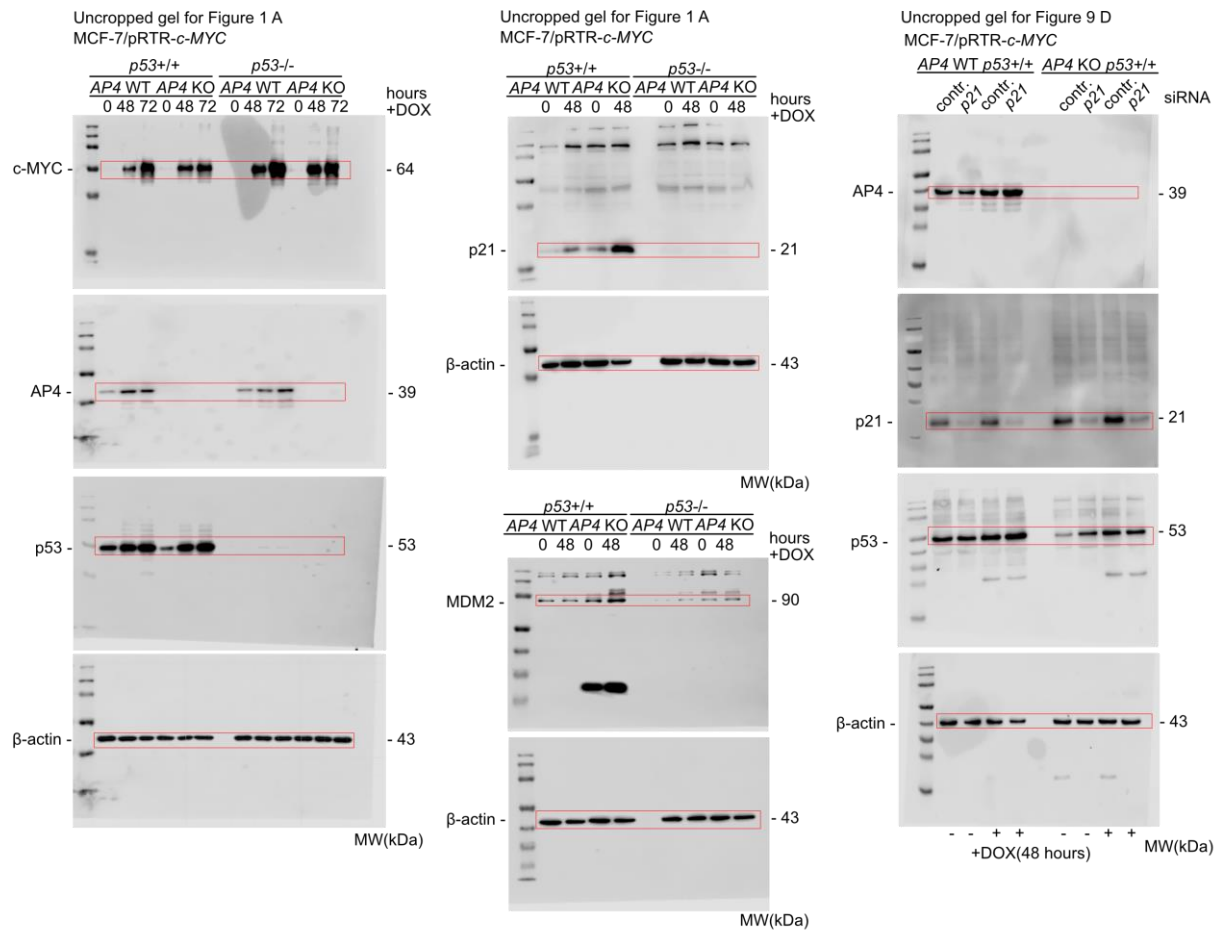

**Figure S1:** Original, uncropped Western Blot images.

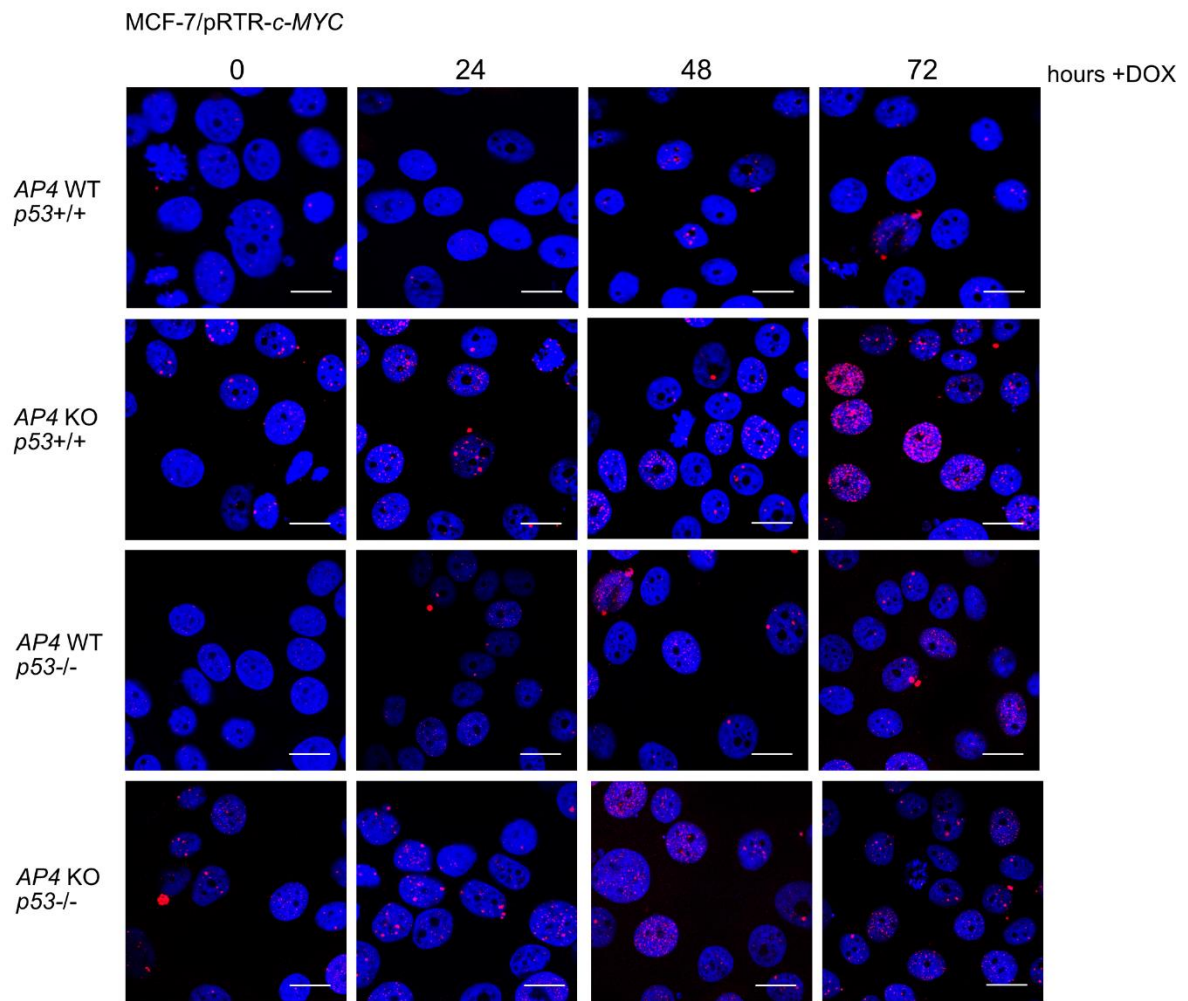

**Figure S2: Characterization of the effects of *AP4*- and *p53*-deficiency on basal and c-MYC-induced DNA damage by  $\gamma$ H2AX staining.** Detection of spontaneous (no DOX treatment) and c-MYC-induced (24, 48 and 72 hours DOX treatment) DNA damage by staining of  $\gamma$ H2AX foci in the indicated cell lines. Scale bars: 20  $\mu$ m.

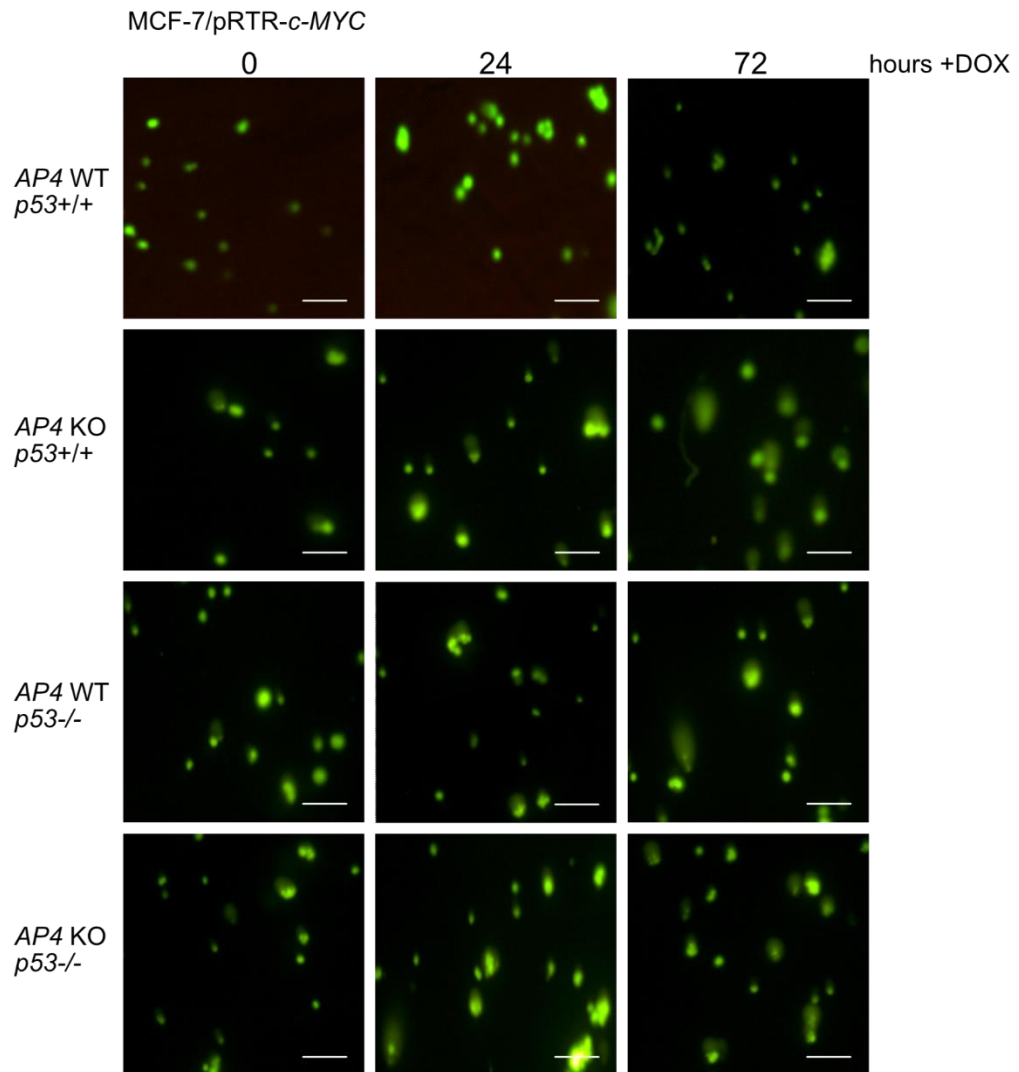

**Figure S3: Characterization of the effects of *AP4*- and *p53*-deficiency on basal and c-MYC-induced DNA damage by Comet assays.** Detection of spontaneous (no DOX treatment) and c-MYC-induced (24, 48 and 72 hours DOX treatment) DNA damage by Comet assays in the indicated cell lines. Scale bars: 10  $\mu$ m

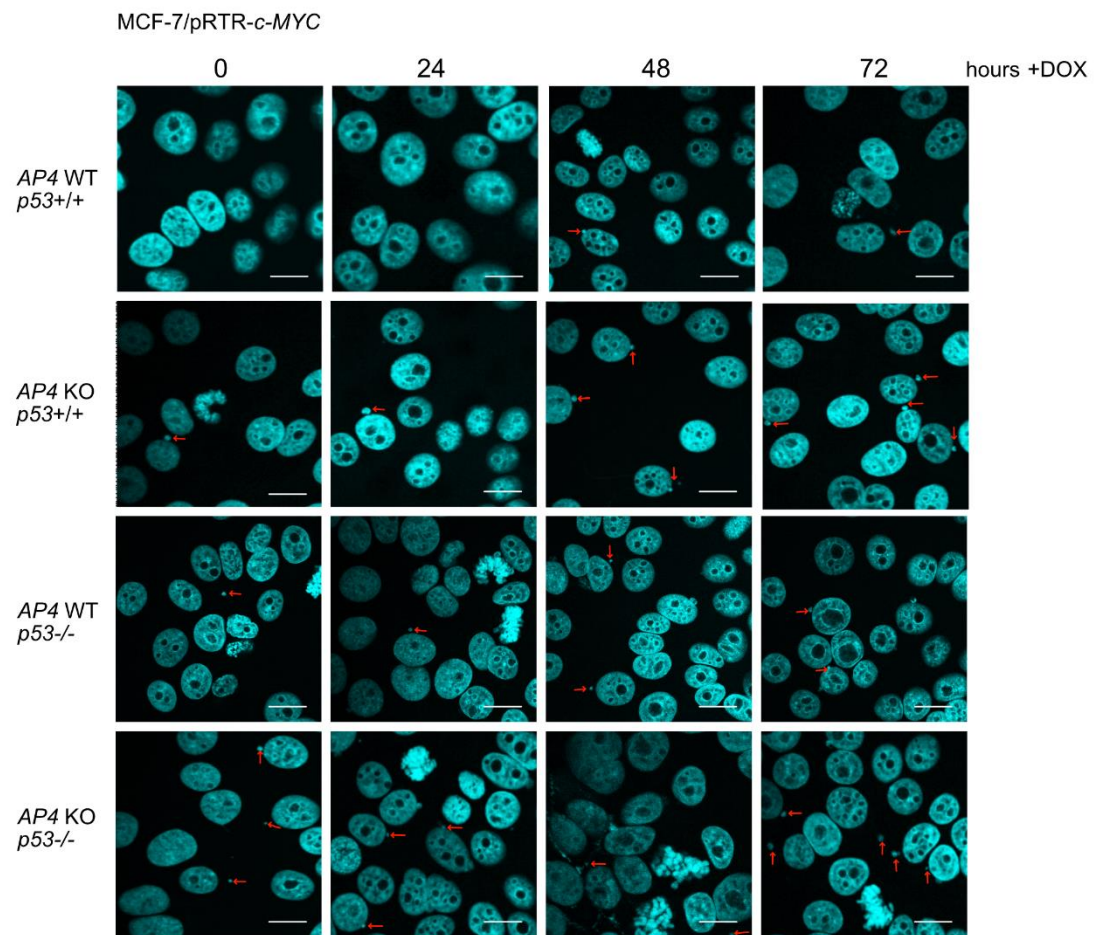

**Figure S4: Basal and c-MYC-induced formation of micronuclei in *AP4*- and *p53*-deficient cells.** Detection of micronuclei by DAPI staining after DOX induced c-MYC activation for the indicated time periods and cell lines. Arrows indicate micronuclei. Scale bars: 20  $\mu$ m.



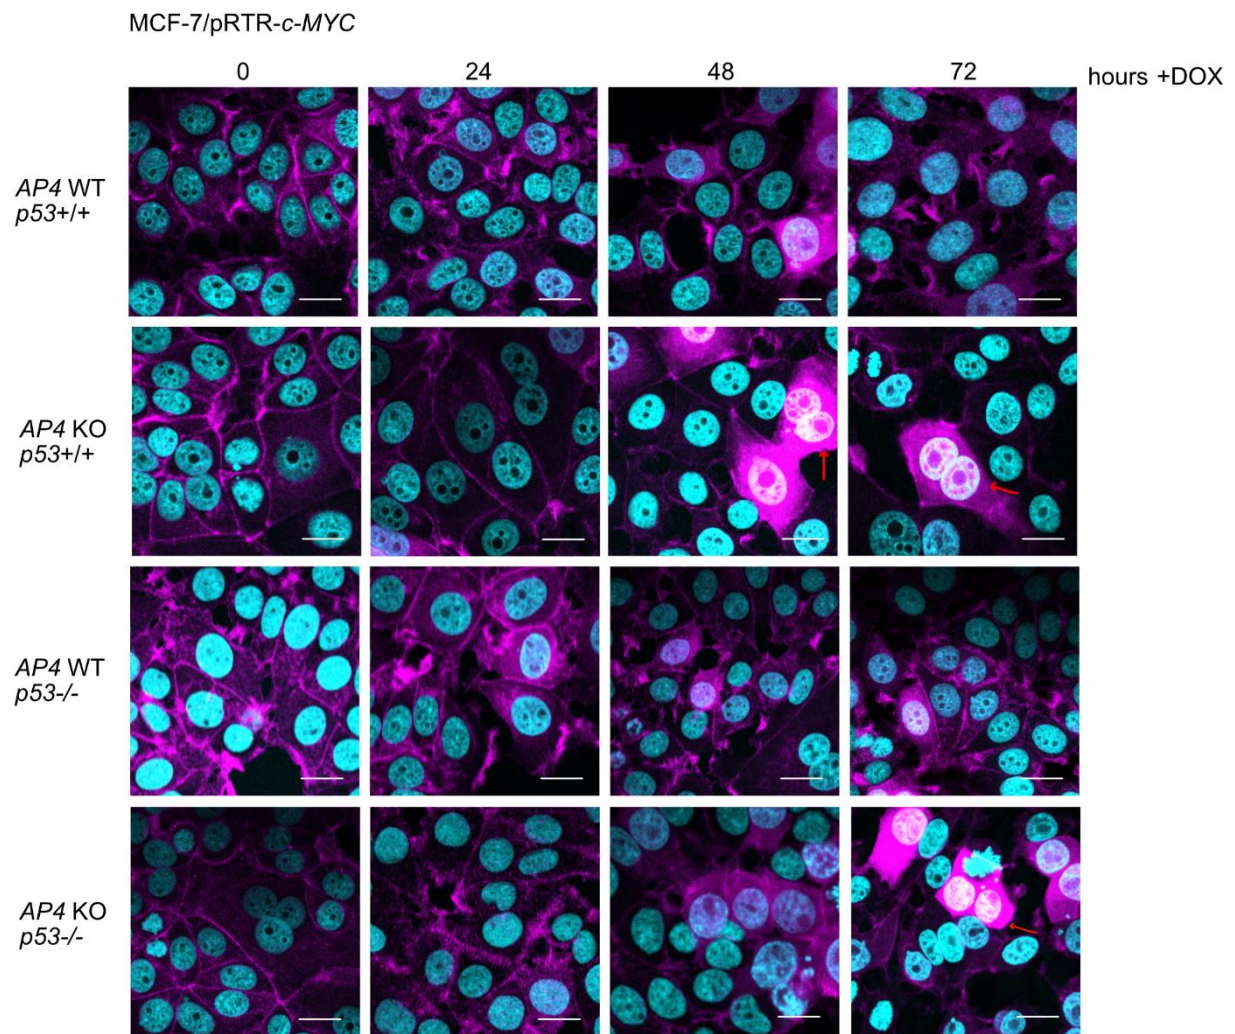

**Figure S5: Characterization of the effects of *AP4*- and *p53*-deficiency on basal and c-MYC-induced formation of bi-nucleated cells.** Detection of bi-nucleated cells after DOX induced c-MYC activation for the indicated time periods and cell lines. Scale bars: 20  $\mu$ m.

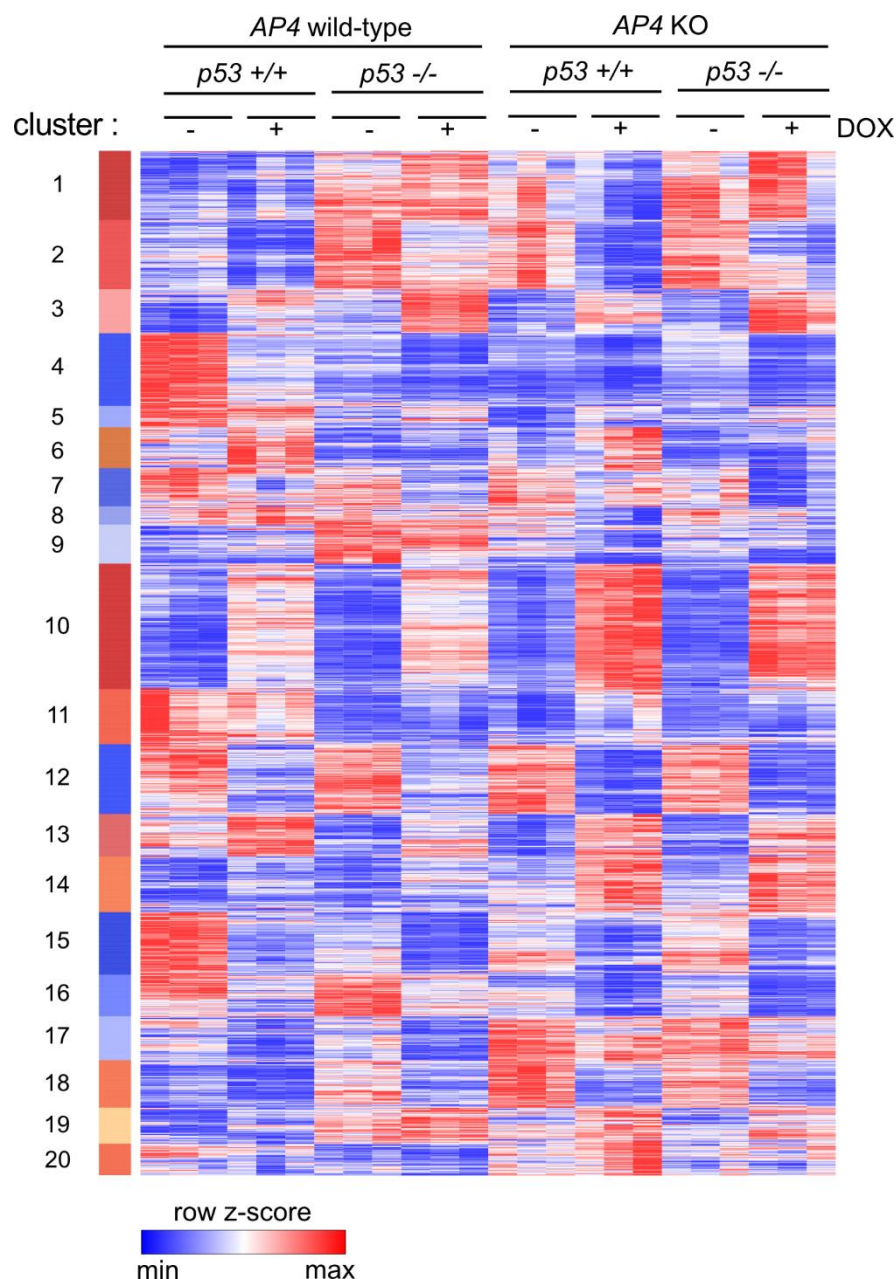

**Figure S6: Clustering of gene expressions with genotype-dependent differences in c-MYC-mediated regulation.** Heat-map of RNA expression of 2309 genes with statistically significant, genotype-dependent differences in regulation after induction of c-MYC. Transcriptional clusters were determined using KMeans clustering. Clusters are indicated on the left.

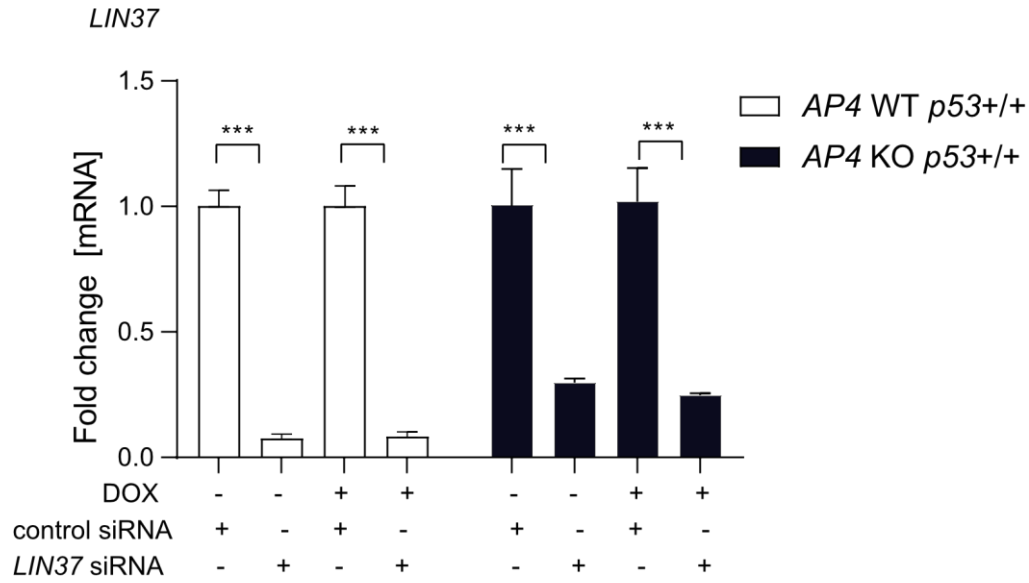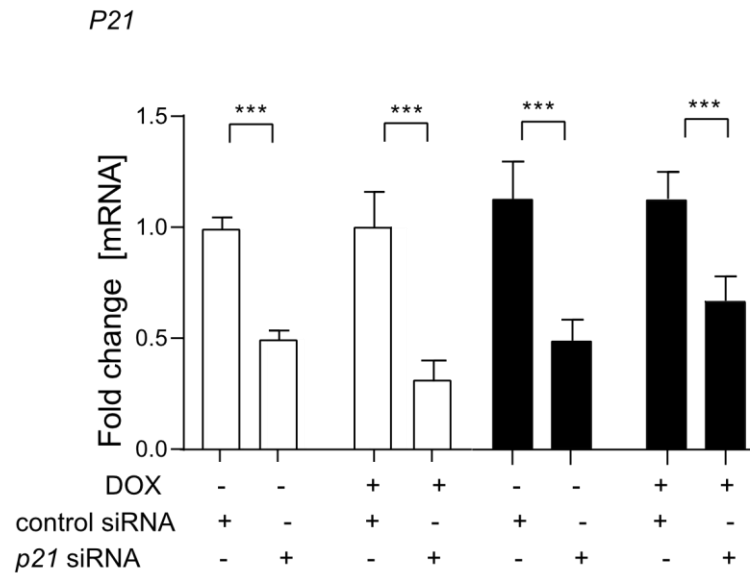

**Figure S7: Validation of siRNA-mediated depletion of *LIN37* and *p21* by qPCR.** qPCR analysis of *LIN37* and *p21* expression after induction of c-MYC in *p53* <sup>+/+</sup> cells with the indicated *AP4* status after transfection with *LIN37*- or *p21*-specific siRNAs. Cells were pre-treated with ICI for 72 hours before siRNA transfection. DOX was added after transfection for 48 hours. Results are presented as mean  $\pm$  SD ( $n = 3$ ) with \*\*\*:  $p < 0.001$ .



**Table S1: Sequence information for guide RNAs used for *AP4* deletion.**

|                     | Sequence information (5'-3') |
|---------------------|------------------------------|
| Guide RNA 1 Forward | CACCGACCAGGAGCGGCGGATTCGG    |
| Guide RNA 1 Reverse | AAACCCGAATCCGCCGCTCCTGGTC    |
| Guide RNA 2 Forward | CACCGGCGTCTCCGCTCGTTGCTGT    |
| Guide RNA 2 Reverse | AAACACAGCAACGAGCGGAGACGCC    |
| Guide RNA 3 Forward | CACCGCGCATGCAGAGCATCAACGC    |
| Guide RNA 3 Reverse | AAACGCGTTGATGCTCTGCATGCGC    |

**Table S2: Sequence information for guide *P53* used for *P53* deletion.**

|        | Sequence information                            |
|--------|-------------------------------------------------|
| sgRNA  | 3' -AUUUUGCCCTGTCGTAGTTTAGTAGG-5'               |
| target | 5' - ATATCGTCCGGGGACAGCATCAAATCATCCATTGCTTGG-3' |

**Table S3: List of Antibodies.**

| Epitope                             | Species | Catalog No. | Company                   | Use | Dilution | Source                      |
|-------------------------------------|---------|-------------|---------------------------|-----|----------|-----------------------------|
| Primary antibodies                  |         |             |                           |     |          |                             |
| β-actin                             | Human   | # A2066     | Sigma-Aldrich             | WB  | 1:1000   | rabbit                      |
| TFAP4                               | Human   | # MCA4993Z  | AbD Serotec               | WB  | 1:1000   | mouse                       |
| P53                                 | Human   | #sc-126     | Santa Cruz                | WB  | 1:1000   | mouse                       |
| c-MYC                               | Human   | #06-340     | Millipore                 | WB  | 1:1000   | rabbit                      |
| γ-H2AX                              | Human   | # JBW301    | Sigma-Aldrich             | IF  | 1:1000   | mouse                       |
| MDM2                                | Human   | # 86934     | Cell Signaling Technology | WB  | 1:1000   | rabbit                      |
| F-actin                             | N.A.    | # A12379    | Thermo Fisher             | IF  | 1:50     | Alexa Fluor® 488 conjugated |
| P21                                 | Human   | #2947       | Cell Signaling Technology | WB  | 1:1000   | rabbit                      |
| Secondary antibodies                |         |             |                           |     |          |                             |
| Anti-mouse IgG HRP                  | N.A.    | # W4021     | Promega                   | WB  | 1:10,000 | goat                        |
| Anti-rabbit HRP                     | N.A.    | # A0545     | Sigma-Aldrich             | WB  | 1:10,000 | goat                        |
| anti-mouse IgG Alexa Fluor Plus 555 | N.A.    | # A32727    | Thermo Fisher             | IF  | 1:1000   | goat                        |
| anti-mouse IgG Alexa Fluor Plus 488 | N.A.    | # A32731    | Thermo Fisher             | IF  | 1:1000   | goat                        |

**Table S4: Oligonucleotides used for qPCR.**

| mRNA           | Forward (5'-3')           | Reverse (5'-3')          |
|----------------|---------------------------|--------------------------|
| <i>β-actin</i> | TGACATTAAGGAGAAGCTGTGCTAC | GAGTTGAAGGTAGTTTCGTGGATG |
| <i>p21</i>     | GGCGGCAGACCAGCATGACAGATT  | GCAGGGGGCGGCCAGGGTAT     |
| <i>MDM2</i>    | TGCCAAGCTTCTCTGTGAAAG     | TCCTTTTGATCACTCCCACC     |
| <i>BRCA1</i>   | CTGAAGACTGCTCAGGGCTATC    | AGGGTAGCTGTTAGAAGGCTGG   |
| <i>CIT</i>     | TGGAAGGTGATGACCGTCTA      | ACGTCCACAAGACACAGTGC     |
| <i>BUB1</i>    | GAGTGATATCTTCAGCTTGTG     | AACAACCTGCTCAACATCAAC    |
| <i>LIN37</i>   | CACTGGCAAAAGGCCATC        | GGTCGAACAGCTTGATCACAT    |

**Table S5: mRNAs significantly up- or downregulated ( $\geq 1.5$ x fold change) MCF-7/pRTR-c-MYC cells (*AP4/p53* wild-type)**

| Significantly up-regulated mRNAs |                              |             | Significantly down-regulated mRNAs |                              |             |
|----------------------------------|------------------------------|-------------|------------------------------------|------------------------------|-------------|
| Gene symbol                      | Log <sub>2</sub> fold change | padj        | Gene symbol                        | Log <sub>2</sub> fold change | padj        |
| MYC                              | 3.872047865                  | 0           | MAN2B1                             | -0.584983277                 | 1.65E-51    |
| AC026786.1                       | 3.515811968                  | 1.82E-179   | SFXN5                              | -0.585050857                 | 1.53E-05    |
| USP2-AS1                         | 3.057708622                  | 2.39E-47    | TRPT1                              | -0.585320296                 | 7.95E-14    |
| PDE4A                            | 2.709562237                  | 5.52E-60    | GTF2IRD2B                          | -0.585631561                 | 4.56E-14    |
| CPNE7                            | 2.46735213                   | 1.59E-59    | SLCO4C1                            | -0.5857502                   | 0.008287374 |
| DUSP2                            | 2.349669966                  | 2.76E-47    | GGT6                               | -0.585755058                 | 1.40E-05    |
| GAL                              | 2.327390887                  | 0           | AC087591.1                         | -0.585993134                 | 0.027013662 |
| PLD6                             | 2.31596678                   | 8.06E-79    | PPP1R3E                            | -0.586096835                 | 0.000158393 |
| KCNQ4                            | 2.308870143                  | 5.63E-25    | FAAH2                              | -0.586412779                 | 0.028685388 |
| RAB3IL1                          | 2.176964342                  | 7.90E-53    | LRTOMT                             | -0.586587815                 | 0.00053131  |
| AC007342.4                       | 2.167684215                  | 2.25E-15    | ZNF230                             | -0.586732577                 | 0.007735687 |
| FABP5                            | 2.158516911                  | 0           | RIBC2                              | -0.587264141                 | 0.034820211 |
| RNF125                           | 2.072788382                  | 1.03E-49    | PPM1E                              | -0.587484214                 | 0.00766181  |
| RGS16                            | 2.041455687                  | 5.23E-89    | EML2                               | -0.58810585                  | 2.00E-24    |
| POLR3G                           | 1.994562072                  | 1.04E-189   | GOLGA7B                            | -0.588201433                 | 1.86E-05    |
| TMEM52                           | 1.972954045                  | 9.30E-14    | LRRC27                             | -0.588261016                 | 1.42E-05    |
| AC040162.1                       | 1.926291443                  | 1.78E-54    | ZNF503-AS2                         | -0.588334611                 | 0.014399461 |
| SORD                             | 1.858242279                  | 8.85E-238   | PLEC                               | -0.588492011                 | 4.70E-18    |
| HOXC8                            | 1.820335106                  | 2.01E-11    | SEPTIN9                            | -0.58894392                  | 1.37E-106   |
| TEX15                            | 1.784018858                  | 4.16E-25    | PCED1A                             | -0.589027559                 | 5.51E-13    |
| RN7SL3                           | 1.769358454                  | 0.003107445 | PXMP4                              | -0.589163563                 | 2.13E-12    |
| EFCAB10                          | 1.752343011                  | 2.95E-10    | SDCBP                              | -0.589285439                 | 3.42E-29    |
| CAMKK1                           | 1.745092885                  | 8.04E-27    | DOCK8-AS1                          | -0.589288274                 | 0.04233111  |
| ANKRD13B                         | 1.739720715                  | 3.35E-85    | PLA2G6                             | -0.589797226                 | 0.000410097 |
| AMER1                            | 1.73005578                   | 2.32E-106   | ATXN1                              | -0.589829626                 | 6.80E-15    |
| PPARGC1B                         | 1.72703481                   | 8.15E-69    | AC006128.1                         | -0.589833853                 | 0.000104049 |
| LRFN1                            | 1.656451375                  | 7.06E-27    | DTX3                               | -0.590095854                 | 1.71E-08    |
| BTG2                             | 1.635713281                  | 7.00E-138   | CALR                               | -0.590153988                 | 1.19E-114   |
| HPDL                             | 1.612742166                  | 1.04E-143   | CPNE2                              | -0.590321677                 | 1.48E-07    |
| SLC16A1                          | 1.605820701                  | 0           | NBPF1                              | -0.590499715                 | 2.18E-31    |
| ADGRE2                           | 1.604737118                  | 3.51E-21    | CTAGE4                             | -0.590548356                 | 0.000367472 |

|              |             |           |                        |              |             |
|--------------|-------------|-----------|------------------------|--------------|-------------|
| SORD2P       | 1.601021279 | 1.37E-09  | IL4R                   | -0.59063869  | 8.57E-13    |
| EN2          | 1.59338902  | 2.29E-65  | CORO1A                 | -0.590931476 | 0.003469932 |
| DNAH17-AS1   | 1.564745919 | 1.57E-10  | PRLR                   | -0.590964736 | 7.43E-13    |
| RPP25        | 1.539617804 | 6.58E-58  | SH3BP5                 | -0.591016238 | 1.17E-86    |
| SMIM11A      | 1.534161253 | 7.90E-07  | DKK1                   | -0.591137753 | 4.75E-34    |
| MICOS10-NBL1 | 1.523778304 | 5.70E-07  | FZD7                   | -0.591266812 | 6.17E-05    |
| TAF4B        | 1.522090831 | 9.99E-103 | TMEM79                 | -0.591344131 | 6.43E-10    |
| DBF4P1       | 1.518149231 | 5.61E-06  | PIGP                   | -0.592054901 | 3.45E-06    |
| ADAT2        | 1.51229078  | 4.94E-76  | PALM                   | -0.592840713 | 1.59E-15    |
| NFE2L3       | 1.511081631 | 5.01E-58  | MPZL3                  | -0.592951275 | 4.10E-24    |
| COQ8A        | 1.509246618 | 8.85E-110 | SYT12                  | -0.592980465 | 9.14E-22    |
| PODXL2       | 1.507121088 | 1.80E-85  | INAFM1                 | -0.593139477 | 5.99E-05    |
| TBC1D4       | 1.499130131 | 7.34E-114 | ARHGEF10L              | -0.593290068 | 1.99E-09    |
| AC005224.3   | 1.485803325 | 6.25E-05  | JDP2                   | -0.593494943 | 3.22E-12    |
| UNC5B        | 1.480978125 | 6.87E-09  | RNF32                  | -0.594098843 | 0.016228739 |
| SLC29A1      | 1.477325903 | 1.40E-239 | KATNAL1                | -0.59484033  | 8.26E-05    |
| MICAL2       | 1.471433661 | 1.71E-19  | TPM1                   | -0.594846252 | 9.75E-66    |
| EMSLR        | 1.466403633 | 3.94E-122 | CTDSP2                 | -0.594953378 | 9.20E-36    |
| ACTL8        | 1.46402373  | 2.39E-05  | PGAP6                  | -0.595348982 | 2.64E-42    |
| GRIN2C       | 1.449243863 | 2.55E-17  | PLIN3                  | -0.597136446 | 6.59E-31    |
| HRK          | 1.397695068 | 6.83E-06  | PPP2R2A                | -0.597156856 | 5.11E-72    |
| MATK         | 1.383410773 | 2.87E-112 | IPO5P1                 | -0.598449903 | 0.005696481 |
| TERT         | 1.372827749 | 5.97E-05  | CFAP44                 | -0.600049862 | 3.04E-06    |
| METTL8       | 1.364043067 | 1.22E-108 | DUSP1                  | -0.600319697 | 1.19E-12    |
| KCTD12       | 1.363547867 | 1.29E-29  | ATP1A1-AS1             | -0.600360202 | 0.006494926 |
| NPAS1        | 1.358410036 | 1.13E-05  | AC016405.3             | -0.601009285 | 0.024214329 |
| PPM1J        | 1.355082212 | 1.10E-09  | ACTR1B                 | -0.601020233 | 3.73E-38    |
| NLN          | 1.346476765 | 5.84E-255 | AC004233.2             | -0.601052199 | 2.64E-05    |
| MXI1         | 1.334248968 | 3.71E-127 | AC020978.5             | -0.601541623 | 6.72E-13    |
| MIR17HG      | 1.333935956 | 4.70E-06  | ATF6B                  | -0.601906025 | 9.82E-41    |
| NRARP        | 1.333791617 | 2.99E-32  | COL9A2                 | -0.601908125 | 0.000760398 |
| FAM117B      | 1.331065618 | 8.79E-53  | ELFN1                  | -0.602355202 | 9.90E-06    |
|              |             |           | ARHGAP27P1-<br>BPTFP1- |              |             |
| RRP9         | 1.321874764 | 3.07E-118 | KPNA2P3                | -0.602578337 | 2.14E-09    |
| SMKR1        | 1.3157789   | 7.70E-36  | ACSS3                  | -0.602674655 | 7.99E-08    |
| PITX1        | 1.311646704 | 2.46E-57  | TTLL3                  | -0.603160234 | 5.78E-12    |
| JAG2         | 1.305610791 | 6.72E-116 | APLP1                  | -0.603657643 | 0.000106219 |
| GPR63        | 1.303894453 | 3.15E-10  | MSRB1                  | -0.604308787 | 1.56E-27    |
| BCL11B       | 1.298261513 | 2.44E-21  | LRRC24                 | -0.604768201 | 0.002474234 |
| GEMIN5       | 1.29557054  | 7.08E-245 | FGFR2                  | -0.604858723 | 7.12E-13    |
|              |             |           | TMEM254-               |              |             |
| SLC16A10     | 1.294422832 | 5.13E-09  | AS1                    | -0.604953524 | 0.038017552 |
| SHISA9       | 1.289384605 | 1.69E-34  | TLE2                   | -0.605195527 | 2.41E-07    |
| LYAR         | 1.287686556 | 3.01E-170 | SLX1B                  | -0.605499751 | 0.000143829 |
| ODC1         | 1.287572951 | 5.41E-249 | PPM1K                  | -0.606272425 | 0.000265365 |
| CHN1         | 1.28458884  | 3.93E-67  | MID1                   | -0.606463333 | 4.76E-05    |
| AP006333.1   | 1.284449156 | 1.23E-08  | ZNF555                 | -0.60870412  | 0.005528965 |

|            |             |             |             |              |             |
|------------|-------------|-------------|-------------|--------------|-------------|
| LINGO1     | 1.284319071 | 2.18E-12    | CTNNAL1     | -0.608998984 | 3.64E-31    |
| VWCE       | 1.28069695  | 0.00028696  | CYTH2       | -0.609379789 | 9.22E-31    |
| ARC        | 1.273548138 | 7.47E-05    | SEMA7A      | -0.609388139 | 9.15E-05    |
| JPH1       | 1.272945754 | 1.63E-32    | NUTM2D      | -0.609754688 | 0.004941474 |
| CD3EAP     | 1.272380885 | 5.21E-136   | CROT        | -0.609911073 | 1.88E-16    |
| ZNF296     | 1.270265566 | 3.85E-18    | SIPA1       | -0.610098066 | 0.000383969 |
| ACSM3      | 1.268702907 | 1.47E-05    | ZNF688      | -0.612081855 | 8.30E-06    |
| NAT8L      | 1.267738244 | 1.60E-59    | PCDH1       | -0.612088972 | 3.13E-11    |
| GNPDA1     | 1.267571126 | 4.15E-100   | CSRP1       | -0.612457927 | 2.28E-86    |
| CRYM-AS1   | 1.257564981 | 0.000277728 | AL441992.2  | -0.613153518 | 0.024151459 |
| RPP40      | 1.255747304 | 6.96E-59    | CARD19      | -0.613603693 | 3.51E-13    |
| BMP7       | 1.247887327 | 3.35E-33    | SPTSSB      | -0.61391718  | 3.58E-121   |
| PMAIP1     | 1.242039203 | 6.26E-15    | MFAP2       | -0.613953043 | 0.000528259 |
| CCDC86     | 1.237803645 | 5.14E-164   | KLF12       | -0.613996268 | 2.27E-05    |
| UBR5-AS1   | 1.233899488 | 2.67E-06    | BPIFB2      | -0.614011456 | 0.012959708 |
| FAM81A     | 1.223504788 | 2.96E-15    | MGLL        | -0.614415022 | 0.015810501 |
| IL27RA     | 1.221040933 | 2.38E-86    | SPATA20     | -0.61451353  | 9.81E-49    |
| PFKM       | 1.208335466 | 4.17E-169   | ZNF251      | -0.614635976 | 2.15E-13    |
| GASK1B     | 1.207688194 | 0.000129694 | ERICD       | -0.615518513 | 0.001408135 |
| AC009831.1 | 1.204420216 | 1.34E-05    | RAB5B       | -0.615537493 | 4.27E-59    |
| BIRC3      | 1.203833022 | 0.000138799 | AL158212.3  | -0.615727128 | 0.003687668 |
| AP001931.2 | 1.203505577 | 0.000288897 | SRRM2-AS1   | -0.615855733 | 0.024732882 |
| PPIF       | 1.20054244  | 1.16E-203   | NFATC2      | -0.615954632 | 4.15E-07    |
| FJX1       | 1.198471288 | 1.41E-45    | AL354707.1  | -0.616036408 | 0.002407596 |
| NPM3       | 1.198325111 | 3.51E-145   | P4HA2       | -0.6161501   | 9.20E-12    |
| EEF1AKMT4  | 1.197320718 | 8.39E-94    | SUMF1       | -0.61657442  | 3.08E-35    |
| TWNK       | 1.191724488 | 5.42E-94    | ZNF362      | -0.616649736 | 3.17E-10    |
| TMC5       | 1.185772947 | 1.34E-10    | FAM161B     | -0.617098192 | 0.000797966 |
| SLC7A11    | 1.183110275 | 1.52E-25    | HSD11B1L    | -0.617109408 | 0.043903615 |
| ANK1       | 1.178653459 | 0.000555284 | CBLN3       | -0.617436566 | 0.032916446 |
| GFOD1      | 1.177094787 | 4.50E-36    | HHLA3       | -0.617497124 | 0.007333039 |
| ABCC4      | 1.172997051 | 6.55E-41    | ZDHHC12     | -0.617659357 | 3.24E-24    |
| RPL23AP7   | 1.172800735 | 1.49E-11    | PAQR4       | -0.618128612 | 8.84E-20    |
| PER1       | 1.167534811 | 3.78E-23    | SLC28A1     | -0.618256195 | 0.001443849 |
| SLC25A19   | 1.165063989 | 1.17E-71    | HEYL        | -0.618578169 | 0.043700052 |
| TYRO3      | 1.157948952 | 6.47E-44    | ZNF837      | -0.619603394 | 0.00271202  |
| PDCD2L     | 1.157114994 | 3.78E-39    | SHOX2       | -0.619963218 | 0.028383832 |
| H2BC11     | 1.156305869 | 2.75E-05    | ZSCAN16-AS1 | -0.620011486 | 0.045694888 |
| CARMIL2    | 1.154769389 | 4.06E-14    | B3GNT3      | -0.620199434 | 1.38E-28    |
| SACS       | 1.154554753 | 4.06E-82    | HGSNAT      | -0.620410464 | 1.46E-13    |
| CFAP157    | 1.149226803 | 3.82E-07    | SRSF5       | -0.620748924 | 3.93E-29    |
| DUSP7      | 1.148603932 | 7.08E-24    | ARHGEF28    | -0.621015021 | 0.00223981  |
| MYBBP1A    | 1.148221621 | 3.23E-234   | OSBPL5      | -0.621136898 | 1.48E-06    |
| CALML4     | 1.146066636 | 5.46E-05    | STARD4      | -0.621177848 | 1.64E-07    |
| KCNK5      | 1.139064243 | 2.29E-08    | STARD13     | -0.621555603 | 0.000475472 |
| SLC27A5    | 1.138422043 | 1.78E-25    | KIF13B      | -0.621949726 | 4.92E-10    |
| IFIT2      | 1.13650842  | 2.55E-05    | CDYL2       | -0.62218084  | 1.11E-41    |

|             |             |             |            |              |             |
|-------------|-------------|-------------|------------|--------------|-------------|
| CENPV       | 1.135647828 | 7.30E-25    | TAPBP      | -0.622502651 | 8.78E-55    |
| DUSP9       | 1.131244113 | 0.000173679 | CALCOCO1   | -0.622872658 | 1.01E-17    |
| USP31       | 1.130956527 | 2.16E-54    | FBXL2      | -0.623046259 | 0.012242362 |
| CMTM8       | 1.129734638 | 1.89E-11    | TSPAN4     | -0.6231285   | 1.70E-13    |
| GRB14       | 1.128627711 | 3.72E-20    | TMEM256    | -0.623181926 | 2.90E-05    |
| ADAM11      | 1.124707415 | 2.20E-10    | CUL9       | -0.623612797 | 1.22E-19    |
| RPIA        | 1.121614956 | 7.01E-133   | YIPF1      | -0.62403277  | 2.01E-09    |
| MPP6        | 1.118016826 | 8.72E-67    | TINCR      | -0.624065403 | 1.53E-20    |
| RAB3A       | 1.113781769 | 1.01E-20    | LDLR       | -0.62416711  | 5.97E-59    |
| RRP1B       | 1.104427254 | 2.00E-153   | PROB1      | -0.624309602 | 0.002226156 |
| NANOS1      | 1.103767884 | 1.40E-11    | AL031777.2 | -0.624754617 | 0.026840736 |
| SLC25A15    | 1.10178884  | 1.88E-100   | ACBD4      | -0.624902014 | 7.50E-07    |
| DPH2        | 1.099782602 | 2.30E-101   | PCDHA11    | -0.625008733 | 1.18E-11    |
| CHCHD4      | 1.098254418 | 2.07E-78    | TBC1D3L    | -0.625230115 | 8.76E-08    |
| PSAT1       | 1.093959251 | 5.56E-107   | AC139887.2 | -0.625243189 | 0.023576873 |
| BEX2        | 1.093595022 | 0.002080531 | FUT8       | -0.625674186 | 1.32E-48    |
| TFB2M       | 1.091542221 | 3.30E-49    | RHOC       | -0.626262929 | 3.43E-83    |
| SFXN4       | 1.090233151 | 1.73E-67    | RNF215     | -0.626892518 | 7.24E-10    |
| FTL         | 1.088773124 | 7.03E-167   | SMIM5      | -0.627303326 | 0.00020343  |
| RNF19B      | 1.087682921 | 5.94E-27    | KIAA0825   | -0.62751679  | 0.047897352 |
| WDR3        | 1.086514827 | 2.98E-222   | FCHSD1     | -0.627551387 | 1.22E-10    |
| FAM72C      | 1.085405923 | 0.005394203 | KCNK15     | -0.627638468 | 6.99E-98    |
| HSPA4L      | 1.084040441 | 2.61E-124   | OSCP1      | -0.628119018 | 0.007923979 |
| NDUFAF2     | 1.083044083 | 1.16E-76    | LRRC20     | -0.628728238 | 9.02E-05    |
| FAM216A     | 1.082613395 | 8.56E-24    | COL4A4     | -0.629686055 | 0.011826325 |
| MAP3K21     | 1.082387368 | 1.44E-31    | MIDN       | -0.630078941 | 1.58E-55    |
| FXN         | 1.080967699 | 1.17E-36    | MISP3      | -0.630151981 | 2.94E-09    |
| DIXDC1      | 1.080469935 | 5.77E-06    | ARID1B     | -0.631167268 | 2.10E-42    |
| FAM78A      | 1.079643515 | 7.07E-14    | UNC13D     | -0.631431387 | 5.54E-58    |
| TDRD1       | 1.077371996 | 3.52E-46    | TGFBR1     | -0.631770955 | 9.36E-54    |
| GPRC5B      | 1.075055679 | 0.000385313 | CELSR1     | -0.632228592 | 4.38E-54    |
| SYT7        | 1.071515442 | 4.27E-24    | ECH1       | -0.632263905 | 3.25E-45    |
| POLR1B      | 1.065418625 | 3.85E-165   | ZNF462     | -0.633008807 | 2.71E-11    |
| BEND3       | 1.061928212 | 1.37E-26    | PACSIN1    | -0.633719442 | 1.78E-09    |
| CC2D2A      | 1.059969133 | 8.61E-21    | PTPRG-AS1  | -0.633740215 | 2.77E-06    |
| DEPTOR      | 1.059824381 | 1.25E-13    | APOBEC3B   | -0.633777267 | 0.019432173 |
| EPOP        | 1.05746042  | 2.24E-78    | MFGE8      | -0.634736289 | 1.18E-06    |
| ABLIM1      | 1.053296758 | 3.03E-100   | CD9        | -0.634816215 | 6.71E-108   |
| SLC27A4     | 1.053172207 | 9.80E-91    | SBK1       | -0.63499315  | 0.001543242 |
| GALNT18     | 1.053067562 | 1.76E-58    | FAM102A    | -0.635457957 | 5.60E-47    |
| MLKL        | 1.049508331 | 8.40E-63    | SMAD3      | -0.635765693 | 4.56E-70    |
| TCOF1       | 1.048917801 | 3.56E-224   | CYP4F11    | -0.635934412 | 0.015343912 |
| MNX1-AS1    | 1.038029207 | 8.76E-12    | LMF2       | -0.63699506  | 1.80E-31    |
| RNASEH1-AS1 | 1.029719164 | 2.34E-17    | LTBP3      | -0.637165383 | 3.23E-72    |
| MON1A       | 1.028526557 | 7.32E-30    | MBOAT7     | -0.638678304 | 1.96E-37    |
| GPR135      | 1.02785834  | 4.55E-05    | TNFAIP8    | -0.639073088 | 1.47E-20    |
| PRELID3A    | 1.025295254 | 4.86E-12    | ANKRD37    | -0.63940841  | 0.024717262 |



|              |             |             |             |              |             |
|--------------|-------------|-------------|-------------|--------------|-------------|
| SNRPA1       | 1.022821255 | 9.36E-156   | PRR15L      | -0.63984558  | 9.70E-18    |
| YRDC         | 1.021045793 | 6.18E-36    | ZSWIM4      | -0.640151093 | 1.94E-06    |
| UTP20        | 1.019820635 | 3.64E-87    | SERHL2      | -0.640299839 | 0.016234616 |
| TRAP1        | 1.018554184 | 0           | FBP1        | -0.640431652 | 5.23E-33    |
| KBTBD6       | 1.017736679 | 3.48E-33    | AC046134.2  | -0.640557776 | 0.007537357 |
| LYSMD2       | 1.016565895 | 8.37E-44    | IQCJ-SCHIP1 | -0.641008269 | 3.34E-07    |
| NOTCH1       | 1.015241906 | 4.99E-92    | SERPINB1    | -0.641117151 | 1.65E-24    |
| WNT10B       | 1.011715183 | 1.84E-17    | RHBDF1      | -0.641156886 | 1.32E-37    |
| STOM         | 1.009605371 | 2.05E-155   | PNPLA7      | -0.641289696 | 0.001727551 |
| ZNRF2P1      | 1.009093927 | 0.0002192   | ALKBH7      | -0.641456077 | 4.80E-14    |
| LRP4         | 1.008596805 | 0.000309452 | GPR39       | -0.64152363  | 0.003627432 |
| SLCO4A1      | 1.005775356 | 2.61E-34    | PLEKHO2     | -0.641722758 | 0.007244973 |
| CCDC85B      | 1.004813964 | 6.04E-98    | DYRK1B      | -0.641896776 | 8.63E-16    |
| SNHG30       | 1.003703146 | 1.84E-15    | CES3        | -0.641913237 | 0.041096749 |
| ATP6V1C2     | 1.001846894 | 5.37E-05    | S100A13     | -0.642131126 | 5.04E-45    |
| KCNG1        | 1.001106428 | 6.69E-18    | ST3GAL5     | -0.642314399 | 0.001818982 |
| PRR5         | 1.001046376 | 1.33E-45    | SLC38A2     | -0.642423004 | 2.89E-107   |
| RABEPK       | 1.000888694 | 2.03E-53    | C6orf226    | -0.643404023 | 0.002807995 |
| CTU1         | 0.999969576 | 3.53E-17    | SEPTIN10    | -0.643474833 | 1.19E-08    |
| DNAJC2       | 0.997571222 | 1.44E-222   | RAB6B       | -0.643827641 | 1.38E-07    |
| NFIX         | 0.99436367  | 4.62E-19    | C21orf58    | -0.644143908 | 3.25E-06    |
| INTS13       | 0.992674815 | 5.50E-79    | NR4A1       | -0.644190149 | 3.63E-15    |
| NKD2         | 0.991105452 | 6.19E-09    | CRYL1       | -0.644632966 | 5.33E-14    |
| AC118553.2   | 0.990479083 | 1.33E-06    | FAM71E1     | -0.644722698 | 0.027503754 |
| RPL23AP82    | 0.989884671 | 2.02E-27    | ARHGEF38    | -0.644834894 | 0.002109888 |
| GNB4         | 0.987679266 | 2.28E-07    | LINC00886   | -0.645055925 | 9.48E-05    |
| TASOR2       | 0.98581924  | 1.53E-121   | MICA        | -0.645111658 | 1.93E-09    |
| PCOLCE2      | 0.985676293 | 3.04E-29    | DLC1        | -0.645439339 | 0.016733829 |
| LOXL3        | 0.985001467 | 2.28E-08    | DNASE1L1    | -0.646040667 | 1.14E-17    |
| TRPM6        | 0.983860471 | 3.22E-07    | AC068888.1  | -0.646206326 | 8.22E-55    |
| DGUOK-AS1    | 0.983581754 | 0.000919641 | C1orf115    | -0.646448222 | 2.21E-05    |
| SUPV3L1      | 0.982980779 | 4.00E-69    | FLNB        | -0.646647451 | 2.87E-104   |
| RUNDC3B      | 0.980360957 | 0.000363128 | RWDD2A      | -0.64730103  | 7.44E-08    |
| PNP          | 0.980022184 | 7.27E-87    | ADCK5       | -0.647716641 | 9.13E-11    |
| NTHL1        | 0.97954216  | 8.73E-31    | AC106795.2  | -0.647798074 | 0.012647658 |
| ATP6V0E2-AS1 | 0.979281563 | 0.000380085 | RNF39       | -0.64841362  | 0.006547076 |
| DDX10        | 0.976085861 | 1.68E-50    | BACE1       | -0.648483431 | 3.86E-51    |
| SPRY1        | 0.975555113 | 2.28E-12    | FMN1        | -0.650017355 | 4.53E-07    |
| TMC8         | 0.973822581 | 9.89E-05    | FLNB-AS1    | -0.650019133 | 0.036993363 |
| REXO4        | 0.973452798 | 4.75E-126   | ARFGAP3     | -0.650906551 | 2.01E-15    |
| TXLNG        | 0.972718249 | 2.26E-93    | TTC9        | -0.65095372  | 2.74E-21    |
| SCML2        | 0.972177153 | 4.53E-10    | PRSS8       | -0.651261169 | 8.70E-17    |
| FDXR         | 0.970198338 | 1.15E-73    | ZNF112      | -0.651556798 | 0.018042421 |
| LDLRAD3      | 0.969999018 | 1.37E-18    | ROCK1P1     | -0.651587601 | 0.04579248  |
| MARS2        | 0.968310258 | 4.38E-46    | DNAJB2      | -0.651656507 | 1.73E-22    |
| SLC25A32     | 0.966889843 | 1.68E-75    | SALL2       | -0.651680449 | 0.029930005 |
| ZNF778       | 0.966507929 | 6.62E-45    | CSRP2       | -0.651798129 | 0.019599733 |

|            |             |             |            |              |             |
|------------|-------------|-------------|------------|--------------|-------------|
| CYP2J2     | 0.96605708  | 0.002475613 | SSH3       | -0.651904968 | 8.97E-62    |
| GALNT14    | 0.964882958 | 1.03E-34    | TUFT1      | -0.652150427 | 2.37E-28    |
| SLC25A33   | 0.961291263 | 2.36E-38    | SLC24A1    | -0.65262394  | 4.69E-12    |
| EIF2B3     | 0.960504404 | 8.30E-35    | TES        | -0.652757931 | 2.52E-35    |
| AC025423.4 | 0.960477128 | 0.000133253 | RHOA       | -0.653054424 | 2.90E-08    |
| KLHL18     | 0.954691532 | 3.43E-47    | GLDN       | -0.653230774 | 0.012802693 |
| KAZN       | 0.951865931 | 3.21E-30    | FRG1HP     | -0.654003543 | 0.011663971 |
| ALDH1B1    | 0.949874919 | 1.26E-62    | PXYLP1     | -0.654454548 | 1.80E-07    |
| AP002387.2 | 0.948069827 | 9.07E-09    | CRELD1     | -0.655306284 | 4.10E-11    |
| SLC19A2    | 0.946502107 | 7.16E-28    | LAMB1      | -0.655394221 | 1.92E-80    |
| AC018645.3 | 0.945699197 | 0.006936571 | TMPRSS2    | -0.656553792 | 1.97E-21    |
| PSMG1      | 0.945332698 | 2.69E-85    | C2orf72    | -0.656861971 | 0.042715723 |
| FMNL2      | 0.943974112 | 1.43E-27    | SEPTIN1    | -0.657226099 | 0.044390187 |
| DDX21      | 0.941543332 | 0           | CCNE2      | -0.657497376 | 4.19E-11    |
| CHAC1      | 0.940308562 | 0.00019894  | XYLT1      | -0.658111847 | 0.014724579 |
| TBCE_2     | 0.940293208 | 3.49E-10    | EXT1       | -0.658304425 | 1.24E-07    |
| DFFB       | 0.939398745 | 7.88E-11    | AC015813.6 | -0.658432865 | 4.55E-06    |
|            |             |             | MAP3K14-   |              |             |
| SMG1P2     | 0.938365154 | 1.95E-14    | AS1        | -0.658466054 | 8.02E-06    |
| PNO1       | 0.937390479 | 1.00E-74    | VLDLR      | -0.658780662 | 2.63E-08    |
| PINX1_2    | 0.936968783 | 7.69E-22    | STX5       | -0.658978034 | 1.34E-24    |
| TRMT61A    | 0.936584002 | 3.79E-52    | NEAT1      | -0.659359196 | 1.04E-35    |
| NOLC1      | 0.935425416 | 6.64E-263   | ABLIM3     | -0.659404395 | 1.19E-13    |
| DTX4       | 0.93398538  | 5.78E-18    | CREB3L4    | -0.659910965 | 3.10E-16    |
| DIAPH2     | 0.932593689 | 1.31E-35    | SRR        | -0.660372073 | 1.93E-05    |
| NDUF4F4    | 0.93088652  | 1.07E-37    | GHR        | -0.660503997 | 0.01015973  |
| QSOX2      | 0.929965095 | 5.46E-73    | LINC01547  | -0.660570087 | 9.85E-07    |
| TUBE1      | 0.929837831 | 2.26E-11    | LMNTD2     | -0.661144976 | 0.009465283 |
| ICAM5      | 0.928832452 | 2.52E-05    | ASIC3      | -0.66135767  | 0.000132599 |
| HSD11B2    | 0.928381756 | 0.005777468 | ACOT4      | -0.661359131 | 0.004738721 |
| PRDM6      | 0.928353763 | 2.49E-05    | RGS12      | -0.661424642 | 6.52E-07    |
| NOP16      | 0.928263049 | 3.53E-146   | HCG4       | -0.66151476  | 0.020019519 |
| TOP1MT     | 0.927682123 | 8.12E-98    | TJP3       | -0.661894646 | 3.82E-19    |
| AP000944.5 | 0.927435505 | 5.88E-05    | LINC01138  | -0.661940901 | 0.003667043 |
| RAB29      | 0.925997458 | 8.74E-46    | TRPS1      | -0.662768356 | 2.97E-21    |
| SIX1       | 0.924951202 | 3.16E-21    | MAFF       | -0.662828955 | 2.43E-06    |
| SAPCD2     | 0.924076938 | 6.88E-191   | CRIP2      | -0.662874464 | 4.56E-57    |
| ELL3       | 0.923841256 | 3.66E-13    | GATA3-AS1  | -0.664313415 | 0.000631656 |
| ASPHD1     | 0.923618318 | 2.10E-16    | FUCA1      | -0.664897679 | 2.60E-17    |
| UCK2       | 0.923178105 | 7.53E-88    | MAN2B2     | -0.66492612  | 9.38E-22    |
| MRM3       | 0.921096731 | 3.89E-60    | SPDEF      | -0.665219967 | 2.93E-55    |
| THUMPD2    | 0.919623318 | 8.64E-19    | PLEKHB1    | -0.665483088 | 2.20E-05    |
| CDC42EP1   | 0.918173697 | 3.67E-71    | IRF7       | -0.665761519 | 0.000360488 |
| TFR2       | 0.917858581 | 9.76E-07    | LINC00294  | -0.665779242 | 1.41E-23    |
| TYW3       | 0.917849216 | 9.71E-44    | IFT27      | -0.666234121 | 7.57E-12    |
| HMGAI1     | 0.917785071 | 8.06E-251   | SYCP2      | -0.666706604 | 1.18E-17    |
| RBM28      | 0.916764259 | 5.50E-90    | CCDC15     | -0.667346008 | 0.01611372  |

|            |             |             |            |              |             |
|------------|-------------|-------------|------------|--------------|-------------|
| COQ3       | 0.916755854 | 3.67E-20    | NAGK       | -0.667394103 | 9.72E-27    |
| IMP4       | 0.916193678 | 1.31E-169   | TLCD5      | -0.667526141 | 0.000308997 |
| TFAP4      | 0.915867664 | 1.35E-38    | ARHGAP29   | -0.668628487 | 3.98E-21    |
| ASNS       | 0.91317362  | 2.11E-108   | APOL6      | -0.668635638 | 6.43E-06    |
| ASTN2      | 0.912033194 | 5.34E-08    | SLC37A1    | -0.668682933 | 6.01E-31    |
| MAST1      | 0.91159449  | 0.000103275 | KCTD11     | -0.668683253 | 2.43E-13    |
| PDSS1      | 0.910151896 | 2.74E-27    | ANO6       | -0.668742578 | 2.02E-60    |
| AC025423.2 | 0.910091967 | 0.000106331 | H6PD       | -0.669130799 | 2.32E-18    |
| GBX2       | 0.909832536 | 0.000481739 | FMNL1      | -0.669206204 | 3.03E-06    |
| MAK16      | 0.908205338 | 1.28E-43    | HMGCL      | -0.669381745 | 1.72E-11    |
| STK32C     | 0.906912857 | 1.28E-23    | ARSI       | -0.669441635 | 4.00E-06    |
| TANGO6     | 0.906705588 | 1.37E-28    | DSC2       | -0.669483176 | 5.82E-34    |
| PDCD11     | 0.905587802 | 7.40E-124   | ZNF596     | -0.669617764 | 0.005773728 |
| CTU2       | 0.905510799 | 4.14E-35    | FA2H       | -0.669669674 | 0.03700374  |
| ZNF695     | 0.905112173 | 7.55E-06    | BHLHE40    | -0.669944271 | 1.60E-25    |
| NUFIP1     | 0.904876429 | 5.61E-25    | H1-O       | -0.67000171  | 1.05E-83    |
| GADD45A    | 0.901999334 | 6.84E-15    | ACP2       | -0.670447734 | 3.24E-12    |
| FOSL1      | 0.900596505 | 9.00E-10    | HLA-C      | -0.670669144 | 2.38E-57    |
| OAS1       | 0.899746305 | 0.010175716 | KAT2B      | -0.671730781 | 1.74E-19    |
| PM20D2     | 0.898996793 | 1.59E-67    | MIR22HG    | -0.671968034 | 4.61E-14    |
| GLS        | 0.898760572 | 7.94E-114   | FADS2      | -0.672088856 | 2.13E-08    |
| PRKX       | 0.898132947 | 5.48E-68    | IFI27L2    | -0.672117555 | 9.79E-08    |
| ARID5A     | 0.897808273 | 4.71E-11    | GPR3       | -0.672895012 | 0.016324255 |
| RPUSD4     | 0.897756457 | 1.44E-37    | TSTD1      | -0.672933896 | 2.35E-18    |
| BAG2       | 0.896977769 | 6.87E-18    | SHB        | -0.673018317 | 2.31E-47    |
| GFM1       | 0.896683716 | 3.41E-120   | RELL2      | -0.673224292 | 2.92E-06    |
| ASB13      | 0.896210774 | 4.06E-32    | RAD51-AS1  | -0.673253189 | 0.007977309 |
| RIOX2      | 0.894926486 | 1.20E-83    | PHLDA2     | -0.673346636 | 2.41E-73    |
| RITA1      | 0.894664476 | 1.95E-73    | GRIN2D     | -0.674079957 | 7.89E-05    |
| SLC19A1    | 0.894045129 | 1.50E-64    | PLD2       | -0.674302599 | 7.05E-15    |
| C1orf109   | 0.893836479 | 1.55E-27    | NICN1      | -0.674968682 | 0.000177903 |
| TRMT11     | 0.893788776 | 3.83E-45    | APAF1      | -0.675374802 | 2.92E-09    |
| ID2        | 0.891277069 | 6.85E-12    | AP000769.1 | -0.67591522  | 0.020166908 |
| ME2        | 0.891069967 | 1.46E-36    | AL450998.2 | -0.676461614 | 0.003970559 |
| PPID       | 0.889581181 | 1.92E-70    | ALDH6A1    | -0.676690578 | 1.42E-20    |
| NCS1       | 0.888576922 | 5.02E-116   | KRCC1      | -0.677284402 | 1.55E-23    |
| KREMEN2    | 0.887759005 | 1.11E-13    | GPX8       | -0.678013407 | 1.01E-15    |
| HHEX       | 0.887666265 | 2.53E-05    | ABCA5      | -0.678115158 | 3.50E-14    |
| LBHD1      | 0.8843661   | 6.79E-17    | BFSP1      | -0.678579337 | 2.07E-08    |
| MRPS30     | 0.884278326 | 1.63E-70    | ATP2B4     | -0.678981859 | 0.023509188 |
| SCO2       | 0.884277653 | 3.87E-21    | GLTPD2     | -0.679253177 | 0.010029415 |
| HOMER2     | 0.884018711 | 2.30E-53    | SYNPO      | -0.679701045 | 0.01766189  |
| CRACR2A    | 0.882506709 | 3.96E-13    | RALY-AS1   | -0.679796992 | 0.006067515 |
| CCNG1      | 0.880867206 | 8.73E-67    | FAM122C    | -0.68004238  | 0.000504417 |
| PDP2       | 0.880375075 | 1.60E-26    | DUSP10     | -0.680884935 | 0.023220743 |
| ZNF485     | 0.879920486 | 4.58E-09    | LRRC37A3   | -0.6808978   | 3.58E-06    |
| AC020763.4 | 0.878093708 | 1.33E-05    | KCND3      | -0.680937848 | 0.038867976 |

|            |             |             |             |              |             |
|------------|-------------|-------------|-------------|--------------|-------------|
| AL024508.1 | 0.877732333 | 5.39E-12    | GATA3       | -0.681654902 | 1.66E-145   |
| RRP1       | 0.877692547 | 2.14E-89    | PLEK2       | -0.681768299 | 3.82E-09    |
| SESN1      | 0.877571179 | 4.61E-28    | FAM153CP    | -0.682447016 | 1.04E-05    |
| SKP2       | 0.876231531 | 6.60E-29    | NAIPP2      | -0.682708265 | 0.001334502 |
| XPOT       | 0.875514166 | 0           | THBS3       | -0.682961295 | 8.48E-20    |
| IMPDH1     | 0.874979461 | 2.06E-117   | PAQR8       | -0.683092297 | 0.009213688 |
| FAM155B    | 0.874898541 | 5.89E-17    | H2AC19      | -0.683853746 | 1.23E-22    |
| NEK5       | 0.874030534 | 0.006585292 | HSPB11      | -0.683898279 | 9.96E-06    |
| ENTPD1     | 0.87359642  | 4.37E-18    | NECTIN2     | -0.6841307   | 6.79E-55    |
| ACTR5      | 0.872897615 | 3.58E-17    | AC012321.1  | -0.684648955 | 0.002143127 |
| DHODH      | 0.87191574  | 3.45E-35    | ZBTB22      | -0.685440629 | 4.21E-16    |
| NR1D1      | 0.870919964 | 1.39E-10    | ADM         | -0.685748811 | 9.64E-17    |
| MRPL50     | 0.869230579 | 5.88E-51    | PDLIM7      | -0.685811612 | 2.65E-42    |
| WDR4       | 0.868304274 | 1.85E-28    | CRACR2B     | -0.685863584 | 4.03E-12    |
| PUS7       | 0.867844878 | 3.48E-106   | COPZ2       | -0.685978071 | 8.99E-11    |
| SINHCAF    | 0.867842592 | 1.00E-71    | LRRC23      | -0.686292559 | 0.001222698 |
| ZBTB24     | 0.867476597 | 6.20E-31    | PNPLA8      | -0.686337031 | 7.18E-35    |
| LRRC58     | 0.867456347 | 1.90E-143   | PPFIA4      | -0.686571621 | 0.004100339 |
| GPM6B      | 0.867203932 | 0.001567436 | SOX13       | -0.68674507  | 4.96E-36    |
| POP1       | 0.864437864 | 3.88E-55    | PAK1        | -0.686833619 | 0.042221183 |
| CCDC112    | 0.863820721 | 1.16E-15    | CNFN        | -0.687271467 | 0.036778886 |
| IL17D      | 0.862626405 | 1.25E-15    | DCDC2       | -0.687411455 | 1.41E-18    |
| POLR1E     | 0.862109176 | 7.94E-34    | ZNF862      | -0.687633698 | 4.79E-10    |
| CMSS1      | 0.862092221 | 6.74E-67    | AC055811.4  | -0.687711219 | 0.001245282 |
| WDR43      | 0.861239624 | 2.30E-130   | NFATC4      | -0.687737308 | 0.002059371 |
| RRP12      | 0.860313369 | 6.08E-119   | ARPC4-TTLL3 | -0.688064023 | 0.000521226 |
| CEBPD      | 0.860152558 | 1.64E-12    | EFNB3       | -0.688769617 | 4.49E-05    |
| DLEU1      | 0.859851763 | 2.72E-17    | CYP2D7      | -0.688921694 | 0.018522658 |
| GTPBP10    | 0.858666452 | 7.37E-62    | DPYSL2      | -0.688992039 | 2.33E-16    |
| PUS1       | 0.858376583 | 3.30E-62    | AC093512.2  | -0.689167915 | 0.00012287  |
| ECSIT      | 0.857183567 | 1.03E-57    | NPHP3       | -0.689240327 | 3.84E-11    |
| AL161772.1 | 0.856251932 | 1.92E-09    | EPHX2       | -0.689582283 | 0.016313709 |
| ZC3H8      | 0.855858353 | 1.57E-28    | OPTN        | -0.689786603 | 9.58E-23    |
| ADGRA3     | 0.855707152 | 6.90E-72    | C2CD4C      | -0.690736634 | 0.007600448 |
| ZNF331     | 0.85471776  | 5.16E-09    | DSCAM-AS1   | -0.690806731 | 1.02E-14    |
| TEAD4      | 0.854543864 | 3.07E-31    | WBP1        | -0.691291674 | 5.39E-32    |
| IFRD1      | 0.854390428 | 3.00E-74    | TRIM34      | -0.691326583 | 0.000248113 |
| JADE1      | 0.852994836 | 6.76E-35    | YPEL5       | -0.691627918 | 4.86E-29    |
| HELB       | 0.852321974 | 3.20E-12    | COL7A1      | -0.691878026 | 0.001218925 |
| FLVCR1     | 0.850686144 | 1.08E-17    | NUDT18      | -0.692049648 | 2.77E-05    |
| E2F5       | 0.849979295 | 3.32E-39    | USP51       | -0.69374384  | 0.013653506 |
| RUVBL1     | 0.847538743 | 7.81E-162   | SYT10       | -0.694871348 | 3.88E-19    |
| HSPBAP1    | 0.847277829 | 4.43E-07    | WDR78       | -0.695357591 | 0.03980849  |
| ZBTB2      | 0.846341749 | 1.13E-55    | INPP5J      | -0.695964356 | 0.040704297 |
| PTDSS1     | 0.845891125 | 1.23E-126   | TMEM229B    | -0.696306342 | 4.21E-12    |
| ARHGEF4    | 0.844694852 | 0.000364444 | PLAAT3      | -0.696492149 | 1.05E-08    |
| XPO5       | 0.844498004 | 5.05E-161   | AC008915.3  | -0.696518279 | 0.034947742 |

|             |             |             |            |              |             |
|-------------|-------------|-------------|------------|--------------|-------------|
| SOX12       | 0.844194047 | 2.26E-67    | NLGN2      | -0.696689511 | 1.33E-28    |
| SLC25A37    | 0.843848996 | 6.18E-47    | FANK1      | -0.696960523 | 2.30E-06    |
| NOC3L       | 0.843559861 | 3.62E-51    | KIAA0895L  | -0.697032081 | 1.04E-18    |
| POLR1C      | 0.84350198  | 1.83E-82    | RNFT1      | -0.697067768 | 1.19E-13    |
| PLIN2       | 0.843294413 | 2.72E-05    | CATSPERG   | -0.697441004 | 0.039909759 |
| SMAGP       | 0.842815704 | 1.02E-45    | SLC4A3     | -0.698035293 | 0.00016434  |
| TNFAIP3     | 0.840411931 | 0.000245766 | EDARADD    | -0.69820891  | 0.002269728 |
| GRPEL1      | 0.838811228 | 6.84E-80    | RHOBTB1    | -0.69844928  | 1.05E-10    |
| LAMC3       | 0.837321359 | 0.012471305 | VEGFC      | -0.698828466 | 1.12E-12    |
| WASF3       | 0.837181731 | 1.89E-21    | UPK2       | -0.699488779 | 7.36E-24    |
| KLHL21      | 0.836907317 | 3.75E-47    | ARSG       | -0.699878134 | 6.58E-08    |
| WNK2        | 0.836712944 | 3.36E-32    | SDC4       | -0.699955819 | 6.76E-106   |
| TAP1        | 0.836555576 | 3.54E-31    | AC007383.2 | -0.700942306 | 0.025913248 |
| ARMC6       | 0.836316805 | 6.38E-75    | PXDN       | -0.701143079 | 1.99E-94    |
| FBXO45      | 0.835396367 | 6.69E-118   | EFHC1      | -0.70122847  | 9.86E-12    |
| SLC39A14    | 0.834224616 | 3.18E-64    | TEP1       | -0.701373001 | 8.06E-19    |
| MTHFD2      | 0.834084962 | 9.78E-158   | THBS1      | -0.701636497 | 4.97E-33    |
| LYRM7       | 0.83405329  | 5.71E-21    | SGMS1-AS1  | -0.701998401 | 0.007917117 |
| C12orf29    | 0.833943059 | 1.37E-32    | GULP1      | -0.702179937 | 3.95E-10    |
| UBIAD1      | 0.833432692 | 1.59E-35    | C4orf19    | -0.702259697 | 3.74E-10    |
| DHX33       | 0.831622659 | 1.26E-55    | ACADS      | -0.702536403 | 4.73E-06    |
| EXOSC5      | 0.831616778 | 6.22E-50    | KCNK15-AS1 | -0.70258988  | 0.040918208 |
| TIMM21      | 0.831529723 | 2.35E-36    | TRIM16     | -0.702731151 | 2.26E-44    |
| LCP1        | 0.830747374 | 0.000128008 | EPHA1      | -0.703417132 | 1.22E-27    |
| PACC1       | 0.8307071   | 3.54E-10    | KLC3       | -0.703787443 | 0.030660433 |
| NOCT        | 0.82985841  | 1.19E-15    | PCLO       | -0.703964348 | 0.002478653 |
| FP565260.3  | 0.829695354 | 1.03E-06    | AC147651.1 | -0.704028497 | 0.000436518 |
| FIRRE       | 0.82950756  | 6.65E-13    | ALS2CL     | -0.704400695 | 2.41E-08    |
| TIMM44      | 0.828818459 | 3.50E-48    | TRIOBP     | -0.705434188 | 7.59E-27    |
| TRMT1       | 0.828736531 | 2.65E-73    | MCC        | -0.705515639 | 1.08E-08    |
| GAN         | 0.828206695 | 7.24E-24    | MARCHF2    | -0.705539972 | 5.39E-07    |
| FASTKD1     | 0.827063447 | 5.41E-31    | APOLD1     | -0.705808346 | 7.80E-05    |
| GRPEL2      | 0.825950648 | 4.71E-29    | AL138885.3 | -0.705850838 | 0.032435804 |
| TMEM33      | 0.824847829 | 6.45E-70    | NRBP2      | -0.706130304 | 1.69E-17    |
| SLC16A1-AS1 | 0.82415519  | 0.000373531 | PINK1      | -0.706731779 | 8.56E-42    |
| ZIC5        | 0.823386878 | 1.66E-09    | KIF3C      | -0.707341462 | 2.98E-12    |
| FKBP5       | 0.823098275 | 3.69E-63    | FEZ1       | -0.707532982 | 0.002167805 |
| THAP4       | 0.822861816 | 1.72E-72    | CIRBP      | -0.70874447  | 2.41E-98    |
| AC002310.1  | 0.822737593 | 0.007250473 | STAT2      | -0.709040066 | 2.16E-17    |
| FAM189B     | 0.821860654 | 8.51E-39    | ERP27      | -0.709050466 | 3.98E-05    |
| HSPA12B     | 0.819876141 | 0.002487659 | IL17RC     | -0.709551165 | 5.21E-18    |
| PRMT5       | 0.819851049 | 1.56E-109   | KRT4       | -0.710143901 | 0.009183874 |
| SCLY        | 0.819418142 | 2.73E-36    | SLC4A11    | -0.710853465 | 0.00012704  |
| NAGPA       | 0.817981144 | 7.22E-24    | ENPP1      | -0.711158451 | 1.09E-27    |
| MRPS2       | 0.817839291 | 2.21E-104   | MXRA8      | -0.712316126 | 0.006376359 |
| ENTPD1-AS1  | 0.817793404 | 3.63E-26    | CHMP2A     | -0.712688745 | 3.87E-43    |
| ZNF239      | 0.817232593 | 3.56E-10    | SAP30L-AS1 | -0.712796559 | 0.048491739 |



|            |             |             |            |              |             |
|------------|-------------|-------------|------------|--------------|-------------|
| UTP15      | 0.81617554  | 2.05E-49    | ANXA2      | -0.713208418 | 2.53E-176   |
| DIMT1      | 0.816032412 | 1.79E-72    | IL1R1      | -0.713739894 | 1.27E-06    |
| KBTBD8     | 0.815982882 | 1.14E-09    | S100A4     | -0.715367936 | 5.57E-16    |
| WDR12      | 0.815643766 | 3.66E-53    | ST3GAL4    | -0.715783978 | 1.91E-88    |
| CAMKMT     | 0.814742886 | 9.37E-08    | AMTN       | -0.715985671 | 0.004535811 |
| FAM131C    | 0.814242863 | 0.000596071 | CSGALNACT1 | -0.716279203 | 9.22E-15    |
| HEATR1     | 0.812806847 | 1.77E-60    | JMJD7      | -0.716326536 | 0.000899763 |
| URB1       | 0.812415141 | 3.92E-106   | ZBTB46     | -0.716394053 | 1.52E-06    |
| CCDC58     | 0.811739472 | 6.13E-32    | NBEA       | -0.716681741 | 1.00E-15    |
| RBM19      | 0.811277215 | 1.02E-51    | AC021092.2 | -0.717073462 | 0.018756491 |
| NIP7       | 0.8096937   | 1.05E-104   | MAP3K12    | -0.717271217 | 2.95E-13    |
| BLMH       | 0.809427972 | 2.41E-49    | VIPR1      | -0.717395584 | 0.000190077 |
| PUM3       | 0.808981864 | 1.15E-60    | THNSL2     | -0.71768029  | 3.77E-15    |
| CFAP97     | 0.808962529 | 7.03E-65    | KRT7-AS    | -0.717926875 | 0.001506778 |
| C15orf39   | 0.806792636 | 6.70E-38    | NUCB2      | -0.718016395 | 7.52E-33    |
| GCFC2      | 0.806280769 | 2.42E-19    | VPS37D     | -0.718045552 | 0.00144156  |
| SHANK3     | 0.802763369 | 8.32E-11    | CAVIN1     | -0.718134132 | 2.73E-14    |
| COA7       | 0.802530963 | 9.56E-45    | PLXNA3     | -0.718676434 | 3.14E-31    |
| TTLL12     | 0.801983367 | 1.90E-113   | VASH1      | -0.719197593 | 0.000132695 |
| L3HYPDH    | 0.801380499 | 2.93E-20    | LARP6      | -0.719348502 | 0.000477864 |
| AC125807.2 | 0.800132242 | 2.65E-13    | BAD        | -0.719372137 | 1.96E-27    |
| FOXO3B     | 0.800008545 | 1.19E-06    | SAMD9      | -0.720025698 | 1.86E-11    |
| DCUN1D5    | 0.798306494 | 8.55E-59    | AC012513.3 | -0.720057195 | 0.014610195 |
| AC107871.1 | 0.797529212 | 2.86E-07    | ERCC1      | -0.720144947 | 2.31E-23    |
| ZNF529     | 0.797460261 | 1.86E-05    | SLC22A4    | -0.720397721 | 0.008145777 |
| ZNF283     | 0.795166135 | 1.14E-07    | ETV5       | -0.720693338 | 5.85E-31    |
| ZMAT3      | 0.794944791 | 1.91E-75    | MYLK-AS1   | -0.720980047 | 0.005503011 |
| PLCH1      | 0.794691474 | 6.92E-23    | SYNM       | -0.721833265 | 1.06E-05    |
| TRIAP1     | 0.794618765 | 9.56E-55    | HIPK2      | -0.722635812 | 2.15E-18    |
| NXPH4      | 0.794590054 | 4.79E-19    | GDPD3      | -0.722661974 | 1.74E-11    |
| HOMER1     | 0.793875724 | 1.13E-45    | CHRD       | -0.723830627 | 5.43E-08    |
| NOP56      | 0.793708084 | 1.75E-138   | MALAT1     | -0.724637977 | 1.51E-23    |
| PFAS       | 0.793427081 | 8.04E-55    | OSMR       | -0.725241204 | 9.70E-35    |
| RPUSD1     | 0.792876132 | 4.25E-66    | AC069281.2 | -0.725250702 | 1.15E-17    |
| LRRC3      | 0.792782626 | 3.84E-05    | CISH       | -0.725668051 | 4.44E-06    |
| YBX3       | 0.791231239 | 2.92E-162   | SLC46A3    | -0.727001042 | 4.57E-05    |
| RP9P       | 0.789318132 | 1.18E-07    | ASPH       | -0.727314891 | 4.69E-35    |
| NCL        | 0.788567407 | 1.40E-200   | PSMG3-AS1  | -0.72754312  | 2.28E-23    |
| KIF9       | 0.788447195 | 2.97E-09    | ZNF311     | -0.727652977 | 0.024910334 |
| PNPT1      | 0.786684655 | 2.79E-74    | ERV3-1     | -0.728168981 | 2.46E-12    |
| PPAN       | 0.785747632 | 4.61E-58    | LIN7A      | -0.728181121 | 0.014170912 |
| ESF1       | 0.785269649 | 6.09E-64    | CLSTN3     | -0.728448687 | 3.04E-15    |
| TRIM47     | 0.785047103 | 1.72E-05    | FAM174B    | -0.729498903 | 1.58E-102   |
| RIOK1      | 0.78460536  | 6.32E-49    | ESPN       | -0.729673147 | 2.81E-09    |
| MDM2       | 0.783281392 | 6.65E-111   | IGFBP5     | -0.730038833 | 1.79E-32    |
| FAM136A    | 0.783227532 | 1.19E-138   | KIFAP3     | -0.73011418  | 3.30E-07    |
| CYCS       | 0.783105686 | 1.27E-145   | CASP4      | -0.730683344 | 2.66E-06    |

|            |             |             |            |              |             |
|------------|-------------|-------------|------------|--------------|-------------|
| FASTKD3    | 0.78146085  | 9.89E-16    | CAMK2N2    | -0.731110271 | 7.88E-06    |
| F12        | 0.781176902 | 1.45E-28    | GLUL       | -0.73119491  | 1.55E-24    |
| KANK1      | 0.781108675 | 4.22E-31    | HHAT       | -0.731873138 | 6.09E-06    |
| UBE3D      | 0.781007968 | 7.02E-06    | H2AC6      | -0.732111565 | 1.64E-19    |
| SLC9B2     | 0.77919109  | 3.99E-15    | CD24       | -0.732376184 | 1.64E-179   |
| PGAM5      | 0.778664928 | 1.01E-97    | GLUD2      | -0.733370815 | 0.024627306 |
| TRNP1      | 0.778113538 | 1.00E-07    | PGAP3      | -0.733475412 | 6.49E-10    |
| AC012676.1 | 0.77738992  | 0.013715675 | SORBS3     | -0.733845804 | 7.91E-20    |
| PFDN2      | 0.776818071 | 5.29E-67    | AL390728.6 | -0.733911875 | 0.003619856 |
| FAM89A     | 0.776780981 | 3.78E-05    | SH3BGRL    | -0.733974521 | 1.09E-41    |
| NAT10      | 0.776748205 | 1.45E-122   | ITGB1      | -0.734603767 | 3.95E-172   |
| FAM53B     | 0.776471611 | 4.55E-52    | KLF4       | -0.73463493  | 1.07E-26    |
| CDC123     | 0.775806    | 2.11E-94    | PPARA      | -0.734836109 | 0.035762256 |
| PWP1       | 0.775275031 | 2.07E-78    | PRRT3      | -0.734931448 | 8.63E-32    |
| MCAT       | 0.775179496 | 1.19E-33    | PRKACB     | -0.734938591 | 2.61E-07    |
| WDR75      | 0.774977293 | 2.69E-67    | GATD3A     | -0.734998792 | 0.014399461 |
| MDN1       | 0.773316661 | 4.51E-13    | HNMT       | -0.736812259 | 0.010551418 |
| BOD1       | 0.773010229 | 7.58E-89    | TMEM107    | -0.737703257 | 7.19E-07    |
| SIM2       | 0.771771553 | 6.67E-09    | NHLRC3     | -0.737957781 | 1.37E-13    |
| NLE1       | 0.769919359 | 1.09E-29    | AC015712.6 | -0.738486959 | 2.63E-10    |
| TPST2      | 0.769718868 | 1.55E-16    | NEU1       | -0.739033637 | 8.51E-37    |
| PALD1      | 0.769690924 | 4.81E-06    | MAGED1     | -0.739290987 | 4.02E-147   |
| CEP83      | 0.769509695 | 4.03E-25    | SGCB       | -0.739501395 | 4.99E-16    |
| PHB        | 0.769374607 | 6.70E-190   | AL132800.1 | -0.739719489 | 0.005613353 |
| EDN2       | 0.768660916 | 0.001831329 | ZNF117     | -0.739925961 | 9.84E-14    |
| TAMM41     | 0.766631529 | 4.72E-23    | RIN2       | -0.740239338 | 6.94E-09    |
| ACER2      | 0.766370112 | 0.000899636 | QSOX1      | -0.740340485 | 2.90E-157   |
| ZNF551     | 0.765872905 | 0.000346746 | MYOF       | -0.740658177 | 5.04E-198   |
| NFKBIB     | 0.76546458  | 1.65E-30    | PAQR6      | -0.740814047 | 2.64E-07    |
| BOP1       | 0.76506499  | 2.98E-163   | ZC3H6      | -0.741228281 | 2.06E-07    |
| NOL10      | 0.764966631 | 2.98E-60    | SQOR       | -0.742003004 | 3.81E-17    |
| LRFN4      | 0.764826694 | 5.24E-61    | TAPBPL     | -0.742573122 | 1.40E-06    |
| GTF2H2     | 0.764145754 | 5.88E-53    | BCL3       | -0.742578433 | 1.84E-16    |
| ACAT1      | 0.764086375 | 4.94E-37    | ARL4C      | -0.742589164 | 2.27E-06    |
| EXOSC4     | 0.763542062 | 8.18E-54    | AC112220.2 | -0.743040592 | 1.05E-05    |
| DNAH14     | 0.762905673 | 2.75E-06    | LRRC46     | -0.743073771 | 0.036019376 |
| HSPD1      | 0.762159725 | 0           | CCDC159    | -0.743290786 | 5.22E-07    |
| ASCC3      | 0.761940744 | 5.34E-103   | CRABP2     | -0.7437888   | 2.36E-165   |
| HDHD5      | 0.761163058 | 1.88E-62    | AL390719.2 | -0.743808903 | 0.045362886 |
| CDKN1A     | 0.760820323 | 5.75E-120   | SNN        | -0.744277289 | 4.47E-12    |
| ASS1       | 0.760691649 | 7.36E-62    | MCOLN3     | -0.744683596 | 0.001399548 |
| REXO2      | 0.760208348 | 5.50E-27    | DISP1      | -0.744766657 | 0.00153228  |
| SMAD9      | 0.760198108 | 0.0398121   | TM7SF2     | -0.745405602 | 5.82E-45    |
| WDR74      | 0.760021903 | 1.99E-67    | PRSS22     | -0.745461591 | 3.44E-21    |
| MRPL36     | 0.759771013 | 9.28E-45    | MC1R       | -0.746546272 | 4.00E-22    |
| SETDB2     | 0.759722866 | 2.64E-09    | MBOAT2     | -0.746632229 | 4.87E-22    |
| TMCO6      | 0.759524181 | 1.31E-11    | NMB        | -0.746725744 | 4.25E-62    |

|            |             |             |            |              |             |
|------------|-------------|-------------|------------|--------------|-------------|
| RCL1       | 0.757281467 | 3.74E-27    | UPK3BL2    | -0.747089365 | 0.004870413 |
| MRT04      | 0.756849884 | 1.29E-72    | SLC2A10    | -0.747558529 | 3.89E-24    |
| IFI30      | 0.756550843 | 1.60E-71    | UACA       | -0.74821098  | 1.19E-39    |
| BCL2L11    | 0.756184303 | 7.72E-20    | MMP23B     | -0.748222626 | 0.025048185 |
| DHX37      | 0.755855558 | 2.71E-73    | ZNF222     | -0.748359698 | 0.025485687 |
| PARVB      | 0.754740452 | 4.39E-07    | RABAC1     | -0.748488105 | 2.31E-32    |
| NDC1       | 0.754259314 | 9.04E-59    | FAT4       | -0.748879187 | 2.21E-07    |
| SRRD       | 0.754062963 | 6.15E-23    | AC090114.2 | -0.749138402 | 1.39E-11    |
| RBM38      | 0.75401414  | 6.32E-56    | F3         | -0.749263445 | 2.38E-07    |
| FOXN3      | 0.753641632 | 5.56E-20    | FXYD3      | -0.749828381 | 1.19E-68    |
| DOHH       | 0.75344132  | 1.88E-15    | LRG1       | -0.749864088 | 0.008950721 |
| ZNRF3      | 0.753143369 | 5.64E-15    | ZNF821     | -0.750557447 | 8.98E-08    |
| FAM162A    | 0.752819197 | 1.10E-35    | FRK        | -0.75135437  | 9.82E-06    |
| NOTCH2     | 0.752554831 | 2.70E-139   | PLOD2      | -0.751654968 | 2.14E-98    |
| DYNC2H1    | 0.752230004 | 3.47E-25    | KRT18      | -0.75251403  | 2.30E-251   |
| TMEM177    | 0.752172216 | 1.40E-11    | TM4SF1     | -0.752839837 | 0.025249387 |
| USP18      | 0.751418616 | 1.41E-12    | ATP2B1-AS1 | -0.753153334 | 0.001130468 |
| SNHG4      | 0.751203432 | 3.00E-25    | AC253536.1 | -0.753389369 | 4.88E-05    |
| GEMIN4     | 0.750940183 | 7.11E-65    | ADSS1      | -0.753418059 | 4.52E-10    |
| FAM210A    | 0.750804961 | 2.87E-33    | OPLAH      | -0.753467761 | 6.34E-06    |
| ARHGEF19   | 0.7502828   | 0.000126747 | AC010503.5 | -0.754054072 | 0.000201336 |
| PES1       | 0.750188016 | 4.43E-138   | ESR1       | -0.754190777 | 2.38E-30    |
| NAF1       | 0.749679233 | 4.40E-23    | SDAD1P1    | -0.754246277 | 0.012478868 |
| NT5C3A     | 0.748577818 | 1.15E-36    | MIEF2      | -0.75431607  | 5.70E-15    |
| ADCY3      | 0.748550613 | 5.10E-70    | RERG       | -0.754483058 | 8.30E-07    |
| CACHD1     | 0.748423942 | 0.003348738 | XBP1       | -0.754584906 | 4.59E-19    |
| IKZF5      | 0.747821354 | 2.19E-29    | TRIM46     | -0.755083094 | 0.003689312 |
| CCDC88C    | 0.746703359 | 8.67E-29    | TUBG2      | -0.755110542 | 6.99E-19    |
| RSAD1      | 0.746284193 | 3.49E-54    | TNRC6C-AS1 | -0.755486326 | 2.87E-06    |
| AC083899.1 | 0.746203225 | 0.001809081 | AL136169.1 | -0.755718187 | 0.031808909 |
| TAP2       | 0.745670745 | 1.30E-36    | KANK2      | -0.755819343 | 9.44E-51    |
| BBC3       | 0.745398721 | 1.54E-20    | BNIP3L     | -0.756154349 | 2.73E-65    |
| AL118516.1 | 0.745357019 | 1.07E-05    | C18orf32   | -0.758757797 | 7.46E-11    |
| KAT2A      | 0.745198044 | 4.95E-58    | LINC01503  | -0.759020181 | 0.001155463 |
| UAP1       | 0.74383082  | 4.94E-47    | AC133644.3 | -0.759131019 | 8.85E-05    |
| MTHFD1L    | 0.743435995 | 1.52E-101   | DAGLA      | -0.759191473 | 1.57E-05    |
| CIPC       | 0.742781585 | 2.19E-39    | SMPDL3A    | -0.759204906 | 2.92E-07    |
| CDV3       | 0.742211695 | 2.01E-112   | UPP1       | -0.759926821 | 3.40E-10    |
| KDM2B      | 0.742068678 | 2.41E-47    | DIO2       | -0.760082973 | 5.07E-39    |
| TTL        | 0.741220347 | 9.68E-45    | SEZ6L2     | -0.76087567  | 2.04E-64    |
| TOMM5      | 0.740732885 | 4.43E-53    | AC016727.1 | -0.761146746 | 0.027324357 |
| TRMT5      | 0.740185532 | 5.31E-25    | AR         | -0.761357559 | 9.64E-17    |
| MRPS17     | 0.739968827 | 2.35E-18    | BCAM       | -0.761548491 | 7.97E-10    |
| CCDC85C    | 0.739855395 | 1.14E-96    | FAM66C     | -0.762211476 | 0.000190561 |
| DNAAF2     | 0.739274823 | 1.08E-32    | BAG1       | -0.762526244 | 2.54E-106   |
| IPO5       | 0.738670432 | 9.58E-125   | SYDE1      | -0.762760444 | 5.27E-23    |
| ABCF2_1    | 0.738649441 | 1.41E-78    | SMIM29     | -0.762886524 | 1.00E-10    |

|            |             |             |            |              |             |
|------------|-------------|-------------|------------|--------------|-------------|
| DTD2       | 0.738409978 | 9.38E-28    | GPR37      | -0.763174837 | 0.000487208 |
| SRXN1      | 0.737675086 | 7.87E-53    | INHBB      | -0.763660763 | 6.98E-110   |
| BCS1L      | 0.73710609  | 1.87E-32    | A4GALT     | -0.763993218 | 1.98E-07    |
| CEBPZ      | 0.736208162 | 8.28E-63    | PKIG       | -0.764133754 | 4.07E-13    |
| AIF1L      | 0.734859143 | 1.36E-85    | TMEM219    | -0.764423029 | 3.93E-20    |
| AC103706.1 | 0.734723656 | 0.028321602 | ORAI3      | -0.766362192 | 2.16E-21    |
| MBLAC2     | 0.734457115 | 9.93E-12    | NDRG1      | -0.76639955  | 3.43E-157   |
| WDR35      | 0.734053754 | 1.51E-24    | GGT7       | -0.766534321 | 1.86E-13    |
| CAD        | 0.732884804 | 8.94E-94    | PAG1       | -0.766580655 | 0.000689689 |
| MRPL30     | 0.732564395 | 2.33E-59    | MARCKS     | -0.767146645 | 2.28E-13    |
| SNAPC4     | 0.732046495 | 5.72E-52    | VMAC       | -0.767305652 | 0.008003478 |
| AKAP1      | 0.731990275 | 7.34E-79    | AL390066.2 | -0.767362968 | 0.035726081 |
| TRIM14     | 0.731597988 | 5.88E-66    | CTSV       | -0.76784892  | 3.68E-06    |
| AGPAT5     | 0.731448597 | 1.44E-51    | MYL6       | -0.768451641 | 7.62E-199   |
| RSL24D1    | 0.731377201 | 2.30E-102   | CAPN5      | -0.769007705 | 1.68E-05    |
| C1QBP      | 0.730853567 | 1.56E-137   | BASP1      | -0.769013794 | 2.09E-119   |
| FOSB       | 0.730685495 | 0.039766227 | RALGPS1    | -0.769040006 | 7.09E-10    |
| NPM1       | 0.729436802 | 0           | AL109918.1 | -0.769058783 | 0.008497235 |
| SEH1L      | 0.729431741 | 1.96E-63    | LPP-AS2    | -0.769309003 | 0.000661232 |
| RSL1D1     | 0.72854435  | 1.27E-170   | CD2BP2-DT  | -0.769755308 | 0.035688784 |
| BCL2       | 0.72803515  | 0.009129641 | EPHA4      | -0.769878935 | 8.98E-15    |
| AC044860.1 | 0.726762627 | 0.030975382 | S100A16    | -0.770175632 | 1.91E-176   |
| NOL8       | 0.725122354 | 5.10E-69    | ERMAP      | -0.770190949 | 2.01E-09    |
| FBL        | 0.724763272 | 1.79E-132   | SLC16A13   | -0.770473441 | 3.18E-05    |
| CARNMT1    | 0.723538649 | 1.31E-23    | PARD6A     | -0.770492405 | 1.47E-06    |
| COX10      | 0.723181238 | 1.30E-16    | TTLL1      | -0.771492908 | 9.66E-06    |
| XPO4       | 0.722799322 | 4.10E-40    | LINC00857  | -0.771548423 | 0.009760638 |
| CACYBP     | 0.721961786 | 2.44E-62    | HLA-DRB5   | -0.772829679 | 0.000538286 |
| SOD2_1     | 0.72150498  | 9.34E-49    | KRT80      | -0.772908195 | 7.39E-242   |
| NARS2      | 0.717953651 | 7.54E-30    | AC099548.2 | -0.773154759 | 0.002653682 |
| RAPGEF5    | 0.717272242 | 3.82E-07    | CUEDC1     | -0.773305445 | 5.22E-41    |
| SLC25A22   | 0.715476623 | 4.76E-42    | UBL3       | -0.773797102 | 1.21E-187   |
| MAP6D1     | 0.715224289 | 8.87E-15    | EPS8L1     | -0.773962089 | 2.07E-26    |
| CISD1      | 0.714793055 | 2.95E-21    | MMP24OS    | -0.774653473 | 6.42E-32    |
| GNB1L      | 0.714632977 | 5.57E-14    | LYPD6      | -0.775489119 | 7.87E-11    |
| AC068946.2 | 0.714132834 | 0.045837108 | H1-2       | -0.775503349 | 4.51E-08    |
| CDIP1      | 0.713945274 | 0.040829031 | BMP1       | -0.777363851 | 2.98E-24    |
| PYGO1      | 0.713920921 | 0.02024007  | MAGED2     | -0.77828301  | 1.53E-62    |
| TUBGCP4    | 0.713349577 | 1.33E-34    | PPP3CB-AS1 | -0.778540937 | 0.002958351 |
| MRPL3      | 0.713180249 | 1.72E-106   | IDI2-AS1   | -0.780600829 | 0.002154486 |
| NEIL2      | 0.711907607 | 1.00E-12    | RMST       | -0.780908894 | 0.024893356 |
| FAH        | 0.711869491 | 1.52E-18    | AC021087.5 | -0.781268093 | 0.000122711 |
| CU633906.7 | 0.71158421  | 3.50E-07    | TMEM53     | -0.781698343 | 0.001485617 |
| GNL3LP1    | 0.710462489 | 0.000171561 | AC093673.1 | -0.782248    | 0.000590743 |
| CEP85L     | 0.710229741 | 1.30E-06    | EMID1      | -0.782398945 | 2.14E-06    |
| NOP14      | 0.709526525 | 3.46E-67    | NUTM2B     | -0.782796358 | 0.006185304 |
| ATP11C     | 0.709001621 | 6.33E-53    | TPM2       | -0.782930777 | 5.24E-21    |

|            |             |             |            |              |             |
|------------|-------------|-------------|------------|--------------|-------------|
| TRMT10C    | 0.7090007   | 3.72E-54    | AC132872.4 | -0.783270559 | 0.000678889 |
| NT5DC3     | 0.708693451 | 1.02E-08    | AL162458.1 | -0.78375398  | 2.11E-10    |
| CDC42EP2   | 0.707846604 | 0.000496707 | ACKR3      | -0.784239206 | 7.87E-24    |
| SERINC5    | 0.707818554 | 1.82E-49    | CCDC24     | -0.78492719  | 5.64E-07    |
| DOCK4      | 0.707814576 | 0.001072126 | ARID5B     | -0.786556518 | 6.23E-26    |
| TAF5       | 0.707757382 | 1.48E-10    | CYP4V2     | -0.787120157 | 7.28E-10    |
| C20orf27   | 0.706238004 | 2.43E-82    | TTC39B     | -0.787199249 | 0.030636191 |
| ISCU       | 0.706080617 | 2.41E-49    | S100A10    | -0.787673977 | 1.92E-162   |
| VPS9D1-AS1 | 0.705815141 | 4.39E-27    | CCN3       | -0.787703268 | 0.019540271 |
| TIPIN      | 0.705652871 | 4.35E-12    | SH3BP5-AS1 | -0.788731891 | 3.16E-10    |
| UTP25      | 0.704322607 | 2.79E-23    | RARA       | -0.789668592 | 1.02E-98    |
| TAF1A      | 0.703223462 | 6.36E-09    | SARDH      | -0.789923077 | 0.040919347 |
| UNKL       | 0.702381459 | 1.67E-16    | MAST4      | -0.790482136 | 7.59E-65    |
| XYLB       | 0.70229961  | 1.13E-05    | RAB19      | -0.791487642 | 0.001242179 |
| CTPS1      | 0.702003478 | 2.71E-58    | BBOF1      | -0.791576313 | 1.58E-06    |
| DDI2       | 0.701419757 | 1.84E-35    | MAN1A1     | -0.791581183 | 4.87E-36    |
| NSUN2      | 0.700183235 | 7.21E-103   | EHBP1L1    | -0.791799832 | 8.49E-69    |
| MRPL4      | 0.699705266 | 3.51E-75    | INPP4B     | -0.792482809 | 5.12E-65    |
| MBTD1      | 0.699271224 | 8.06E-31    | IL6R       | -0.792933726 | 1.33E-06    |
| ANKRD27    | 0.6990105   | 3.85E-66    | TNNT1      | -0.79315613  | 5.14E-31    |
| RNF145     | 0.698686902 | 6.04E-09    | GPRC5C     | -0.793457299 | 1.34E-25    |
| ZNF639     | 0.697772989 | 4.12E-34    | GPC1       | -0.793533889 | 1.36E-22    |
| DUS3L      | 0.696981059 | 1.34E-29    | NPC2       | -0.793606907 | 1.57E-30    |
| KLHL23     | 0.696977971 | 6.25E-11    | ZNF792     | -0.794540786 | 0.033769686 |
| EBNA1BP2   | 0.696960595 | 3.63E-75    | CD63       | -0.794953239 | 6.49E-205   |
| IMP3       | 0.696828745 | 8.71E-47    | MAGI2      | -0.79539299  | 0.000101985 |
| AC002316.1 | 0.696282256 | 2.55E-42    | TENT5A     | -0.795399235 | 1.38E-35    |
| QTRT2      | 0.696161518 | 5.06E-55    | TSPAN31    | -0.795486078 | 3.50E-25    |
| TUBBP5     | 0.696160976 | 0.039733611 | EPHA2      | -0.7962114   | 8.56E-61    |
| ABCE1      | 0.695978436 | 6.52E-126   | ZNF467     | -0.796925039 | 1.96E-23    |
| CCDC59     | 0.695408731 | 1.82E-38    | FGF        | -0.797499721 | 0.005619407 |
| GTF2F2     | 0.695202301 | 2.91E-32    | LYRM9      | -0.797744889 | 0.003583711 |
| NUP188     | 0.69421085  | 2.89E-78    | RPS10P7    | -0.797954318 | 0.001605431 |
| CDR2L      | 0.693511385 | 1.19E-25    | CCDC88B    | -0.798273996 | 0.022354572 |
| KATNAL2    | 0.69098105  | 0.004232629 | IFI27L1    | -0.798485445 | 0.022178932 |
| ASH1L-AS1  | 0.690432226 | 0.001142808 | GALNT10    | -0.798554661 | 4.28E-88    |
| CEBPA-DT   | 0.689593993 | 0.00323748  | TRGV9      | -0.799425627 | 0.006231083 |
| RPF2       | 0.688257031 | 7.14E-35    | SOCS2      | -0.800866338 | 6.23E-07    |
| BRX1       | 0.687864189 | 1.33E-45    | HID1       | -0.801923104 | 4.67E-88    |
| GLRX3      | 0.687544359 | 4.21E-62    | PAQR7      | -0.80351316  | 0.000451807 |
| Z83844.3   | 0.68724281  | 2.58E-08    | PDLIM2     | -0.803817967 | 1.61E-19    |
| UTP4       | 0.686937758 | 1.32E-72    | UPK3B      | -0.805398823 | 1.36E-23    |
| EIF1AX     | 0.68685549  | 6.89E-100   | GNAO1      | -0.805430601 | 0.037328745 |
| DCTPP1     | 0.68522205  | 9.71E-106   | FGD3       | -0.805584692 | 1.85E-38    |
| ZNRD1      | 0.685136579 | 1.56E-15    | BTG1       | -0.805645675 | 7.49E-68    |
| CLUH       | 0.684530744 | 5.61E-81    | AC007406.5 | -0.806298443 | 0.026929606 |
| ARL6       | 0.684388152 | 4.90E-08    | HSH2D      | -0.806378219 | 1.01E-15    |



|            |             |             |            |              |             |
|------------|-------------|-------------|------------|--------------|-------------|
| DGAT2      | 0.684264678 | 0.034782893 | CITED2     | -0.806555792 | 2.75E-45    |
| SERF1B     | 0.684191172 | 1.41E-21    | TMCO3      | -0.807899543 | 1.61E-45    |
| PIM2       | 0.684135173 | 9.94E-12    | DNAJC4     | -0.808542121 | 3.76E-19    |
| URB2       | 0.68299682  | 6.82E-25    | OPN3       | -0.808721213 | 2.16E-21    |
| KDM1A      | 0.682632427 | 6.45E-77    | ASB16      | -0.808972409 | 0.024797017 |
| ALKBH2     | 0.682069418 | 5.56E-21    | TMPRSS3    | -0.809314138 | 0.004960792 |
| EOMES      | 0.681424973 | 7.05E-06    | LIMD2      | -0.809769273 | 0.027237782 |
| MTRR       | 0.680609281 | 2.53E-26    | AC008556.1 | -0.810282524 | 0.004941234 |
| UTP23      | 0.680042863 | 5.34E-32    | ENPP5      | -0.810437758 | 3.61E-09    |
| TOMM40     | 0.679871176 | 2.72E-82    | OCEL1      | -0.8113264   | 1.72E-05    |
| POLR3A     | 0.679665573 | 2.59E-38    | ARHGAP4    | -0.812126071 | 9.71E-06    |
| LYRM4      | 0.679555487 | 9.56E-16    | HDAC5      | -0.812263087 | 2.11E-07    |
| MCEE       | 0.67950619  | 0.000648301 | CLIP4      | -0.812462437 | 0.035405582 |
| UCKL1-AS1  | 0.677699007 | 0.011701154 | FAM214B    | -0.813089765 | 1.33E-06    |
| YBX1       | 0.677508587 | 1.59E-189   | MAB21L4    | -0.813718622 | 1.82E-05    |
| ETV4       | 0.677245766 | 0.000462109 | GSEC       | -0.814440923 | 3.47E-11    |
| FKBP4      | 0.675385468 | 7.49E-147   | ZBED5-AS1  | -0.814553392 | 0.000790587 |
| ZIC2       | 0.675313433 | 2.70E-10    | AGRN       | -0.815035923 | 6.95E-234   |
| GTF2H2C    | 0.675146626 | 9.98E-39    | CLIP2      | -0.815194532 | 0.000171949 |
| ELAC2      | 0.675007498 | 1.17E-63    | FAM189A1   | -0.815256647 | 0.01852835  |
| NOC2L      | 0.674961546 | 1.16E-93    | PALLD      | -0.816222854 | 1.71E-52    |
| TMEM158    | 0.674916054 | 0.00341067  | SLC1A4     | -0.816254127 | 5.48E-10    |
| MEMO1      | 0.674750015 | 5.80E-34    | ZNF606     | -0.81694213  | 0.002511451 |
| AP000648.4 | 0.674413673 | 0.014672217 | TMEM198    | -0.817033454 | 0.013497696 |
| SMG1P1     | 0.6742397   | 2.02E-13    | TTYH3      | -0.81832544  | 6.26E-48    |
| CBR1       | 0.67403174  | 6.42E-55    | LINC01213  | -0.819520601 | 0.020544665 |
| DLAT       | 0.673930481 | 7.14E-44    | SPSB4      | -0.820420839 | 0.037067086 |
| DUS2       | 0.673920817 | 1.00E-25    | PRSS30P    | -0.821680143 | 0.000212585 |
| LRIG3      | 0.673665394 | 2.30E-08    | OLFM1      | -0.821691127 | 1.52E-29    |
| FBXO25     | 0.673638204 | 1.74E-18    | SMIM14     | -0.821829014 | 3.11E-73    |
| TNFRSF10A  | 0.673472967 | 5.04E-21    | SH3TC1     | -0.822277887 | 1.22E-06    |
| IARS1      | 0.673419634 | 1.09E-145   | TGFB1      | -0.822481485 | 2.59E-23    |
| IPO11      | 0.6730885   | 4.55E-40    | KIAA0319   | -0.822746383 | 0.001913258 |
| MRPS27     | 0.673045789 | 1.64E-73    | CCDC170    | -0.822942318 | 1.27E-15    |
| PARPBP     | 0.672986118 | 6.66E-20    | PRRT2      | -0.824941199 | 4.41E-05    |
| NOM1       | 0.671993077 | 3.33E-54    | MT1X       | -0.824974869 | 2.19E-21    |
| RMND5A     | 0.671878054 | 1.54E-35    | PLCD1      | -0.825171006 | 0.005728621 |
| PHGDH      | 0.671602459 | 4.36E-41    | RPRM       | -0.825356724 | 0.001194996 |
| CARD9      | 0.671355001 | 2.51E-05    | SLC1A2     | -0.826079383 | 0.00724922  |
| OTUD6B     | 0.671345484 | 6.91E-31    | ERRFI1     | -0.826093378 | 3.20E-36    |
| EXOSC7     | 0.670746626 | 1.33E-27    | EPAS1      | -0.826628867 | 5.37E-162   |
| NDUFAF1    | 0.669331733 | 3.17E-13    | GEM        | -0.826971695 | 0.000552632 |
| ZNF74      | 0.668960697 | 5.04E-18    | DNAH10OS   | -0.827127724 | 1.91E-05    |
| TIMM17A    | 0.668910554 | 3.74E-58    | MOSPD3     | -0.82744351  | 1.31E-21    |
| ZNRD2      | 0.668867586 | 4.23E-22    | SERPINB8   | -0.827488151 | 5.66E-05    |
| TRIM65     | 0.668800857 | 5.95E-36    | DGCR6      | -0.827593086 | 0.001433052 |
| MRPL15     | 0.668619532 | 1.44E-37    | ZNF211     | -0.827698142 | 0.00053682  |

|            |             |             |            |              |             |
|------------|-------------|-------------|------------|--------------|-------------|
| TBRG4      | 0.667065976 | 1.25E-57    | TK2        | -0.827761919 | 9.26E-08    |
| ZNF749     | 0.665700394 | 4.28E-05    | PPL        | -0.828501534 | 2.39E-182   |
| PPTC7      | 0.665576545 | 2.14E-27    | ANXA6      | -0.829741961 | 1.10E-38    |
| PRMT3      | 0.665312631 | 1.62E-35    | RRAS       | -0.829801732 | 6.32E-12    |
| CA5BP1     | 0.664970837 | 4.20E-06    | PLEKHH2    | -0.830124605 | 0.000178981 |
| ZNF121     | 0.664955886 | 1.18E-24    | C9orf72    | -0.831563932 | 0.042773029 |
| GNL2       | 0.664899381 | 2.82E-54    | CCNG2      | -0.832052879 | 2.61E-48    |
| KLHL8      | 0.664310709 | 9.85E-38    | CCDC18-AS1 | -0.832373309 | 0.000115432 |
| ZSCAN12    | 0.663546138 | 0.029758458 | ADGRF4     | -0.833582173 | 5.52E-12    |
| NT5DC2     | 0.663277282 | 1.24E-54    | KRT8       | -0.833911195 | 0           |
| CLNS1A     | 0.66299891  | 4.27E-82    | DARS-AS1   | -0.833989658 | 0.002017363 |
| MRPS12     | 0.662948455 | 3.41E-43    | LINC01135  | -0.834217506 | 0.01075325  |
| HMOX2      | 0.662571809 | 5.50E-59    | ACSS2      | -0.834390559 | 1.30E-26    |
| SHQ1       | 0.662427034 | 3.29E-28    | ETHE1      | -0.834683969 | 7.22E-11    |
| PAK1IP1    | 0.66228849  | 1.61E-28    | ST3GAL3    | -0.835269861 | 0.000453747 |
| KATNB1     | 0.662146299 | 8.77E-24    | LYST       | -0.835330951 | 6.05E-06    |
| COA6       | 0.661526765 | 8.47E-14    | PIGZ       | -0.836158187 | 0.000141559 |
| MTIF2      | 0.661298342 | 3.39E-47    | IDUA       | -0.83644418  | 2.11E-09    |
| AC253572.1 | 0.660595196 | 0.004690786 | PODNL1     | -0.836929366 | 0.000812282 |
| AGMAT      | 0.660348341 | 4.00E-11    | FP671120.8 | -0.837089059 | 0.026317718 |
| PIGW       | 0.660021359 | 7.58E-22    | SEMA3F     | -0.837429828 | 4.01E-20    |
| RPRD1A     | 0.65937344  | 4.19E-61    | HDAC6      | -0.837865862 | 2.73E-28    |
| ARL5A      | 0.658785525 | 1.27E-50    | AC022034.1 | -0.83876036  | 9.09E-08    |
| AEN        | 0.658456717 | 3.87E-44    | SSPO       | -0.838919718 | 6.66E-06    |
| EXPH5      | 0.657812684 | 0.003667641 | AL021392.1 | -0.838953719 | 0.015283003 |
| TXNL4B     | 0.657645392 | 5.97E-15    | SCARF2     | -0.83933633  | 0.010703198 |
| CD320      | 0.657348394 | 2.18E-34    | S100A2     | -0.839385403 | 0.025413628 |
| AC140479.2 | 0.657098849 | 0.02826578  | KNDC1      | -0.839569321 | 0.014734684 |
| DYRK3      | 0.65702964  | 5.88E-08    | PPP1R18    | -0.839962862 | 1.96E-29    |
| NOL9       | 0.656827133 | 4.70E-23    | PLCXD2     | -0.840236264 | 1.59E-06    |
| DNAJA3     | 0.656288109 | 1.62E-79    | LHPP       | -0.841177416 | 3.14E-16    |
| TSR1       | 0.656254232 | 9.91E-84    | MATN2      | -0.841311612 | 4.38E-17    |
| DUXAP9     | 0.656112508 | 4.33E-13    | MEAK7      | -0.843319008 | 4.25E-33    |
| FBRSL1     | 0.655836704 | 9.68E-63    | SLC25A35   | -0.843916905 | 0.030548763 |
| SLIRP      | 0.655836626 | 1.84E-37    | HIVEP3     | -0.84423049  | 7.86E-07    |
| KHDRBS3    | 0.655591988 | 0.00029782  | ANO8       | -0.844483603 | 3.07E-17    |
| MIS18A     | 0.6554594   | 5.62E-21    | ACHE       | -0.845026204 | 2.11E-09    |
| EIF5A      | 0.655278202 | 1.35E-114   | ADIRF-AS1  | -0.845999688 | 7.49E-07    |
| GPT2       | 0.655197346 | 1.57E-48    | UBA7       | -0.846622516 | 7.33E-05    |
| MYCBP2     | 0.65516844  | 3.16E-38    | LYSMD4     | -0.846947019 | 7.16E-09    |
| PPAT       | 0.655016517 | 2.33E-39    | AC096677.1 | -0.84805379  | 0.007478463 |
| HYAL3      | 0.654784305 | 0.001689087 | SLC25A29   | -0.848437312 | 7.95E-41    |
| CCDC78     | 0.654168474 | 7.60E-21    | PRAF2      | -0.84875874  | 3.14E-20    |
| WDCP       | 0.653842327 | 1.91E-10    | BMP8B      | -0.848926298 | 3.57E-05    |
| DDX49      | 0.65365741  | 1.68E-54    | LINC00482  | -0.849289194 | 0.045119696 |
| AC113189.4 | 0.653394436 | 5.09E-05    | CACFD1     | -0.849302686 | 4.40E-24    |
| ZNF614     | 0.653212433 | 0.003972277 | AFAP1L2    | -0.849735115 | 2.68E-06    |

|            |             |             |             |              |             |
|------------|-------------|-------------|-------------|--------------|-------------|
| IGSF9B     | 0.653208076 | 3.63E-05    | ASMTL-AS1   | -0.850694499 | 0.016803453 |
| NAMPTP1    | 0.652911965 | 2.58E-11    | GYG2        | -0.851233482 | 5.84E-05    |
| AHCTF1     | 0.652633707 | 7.27E-50    | ZNF703      | -0.851588414 | 1.07E-41    |
| PRMT1      | 0.652439035 | 6.29E-104   | AC104452.1  | -0.851880553 | 0.000111966 |
| HAUS7      | 0.65203838  | 1.26E-10    | TIMP1       | -0.852178042 | 4.15E-72    |
| FAM86B1    | 0.651727762 | 7.86E-09    | RNF224      | -0.852641125 | 0.001231025 |
| AP001505.1 | 0.651553449 | 0.00848467  | NRP1        | -0.854025912 | 5.49E-152   |
| C12orf45   | 0.651006939 | 1.46E-11    | TIAM2       | -0.854818342 | 0.000748264 |
| CEBPA      | 0.650824302 | 9.35E-11    | KIAA1324    | -0.855857212 | 9.43E-27    |
| ELOA       | 0.650571792 | 1.11E-58    | MUC20P1     | -0.856506726 | 0.019217717 |
| KDM1B      | 0.650202373 | 1.94E-18    | SCARA3      | -0.856657551 | 3.08E-09    |
| ZNF37A     | 0.65010432  | 4.63E-20    | LINC00511   | -0.856713548 | 0.000122951 |
| KPNA3      | 0.649828893 | 7.31E-48    | ARSA        | -0.856768777 | 2.65E-23    |
| POLR3K     | 0.649590434 | 1.61E-44    | SYTL2       | -0.85722052  | 1.70E-147   |
| FAM222A    | 0.649522868 | 1.28E-09    | TMBIM1      | -0.857841802 | 0.002389688 |
| SMIM13     | 0.648809804 | 5.33E-19    | DIRC3       | -0.857878818 | 0.002552948 |
| MRPS26     | 0.647967719 | 1.44E-32    | GPRC5A      | -0.858153796 | 6.91E-206   |
| OIP5       | 0.64756134  | 1.69E-05    | RUNDC3A-AS1 | -0.859566149 | 1.50E-08    |
| SRPK1      | 0.647387644 | 2.85E-70    | NINJ2-AS1   | -0.859965466 | 0.000111669 |
| SLC18B1    | 0.647075718 | 1.81E-24    | BAIAP3      | -0.860474733 | 9.23E-06    |
| DHX34      | 0.646678845 | 2.53E-21    | RAP2C-AS1   | -0.860596755 | 0.0076252   |
| NUDT4B     | 0.646387935 | 0.000728636 | ARSD        | -0.860904555 | 3.00E-55    |
| PA2G4      | 0.646301117 | 2.54E-148   | ADIRF       | -0.861141395 | 1.43E-18    |
| ZNF598     | 0.644234535 | 2.04E-67    | TPO         | -0.861195831 | 2.50E-05    |
| SLC25A30   | 0.644046362 | 3.21E-10    | FHL2        | -0.861371343 | 2.09E-32    |
| AK6        | 0.64395615  | 1.23E-31    | H4C8        | -0.86167152  | 1.73E-09    |
| MTERF3     | 0.643643082 | 3.97E-15    | ECE1        | -0.861756372 | 1.05E-162   |
| MTFMT      | 0.643418192 | 6.00E-17    | ETNK2       | -0.861780726 | 1.05E-22    |
| SLC35F2    | 0.643392612 | 2.33E-26    | NOXA1       | -0.862577773 | 3.18E-13    |
| FKBP11     | 0.642688196 | 1.49E-20    | PHF1        | -0.863058716 | 3.51E-29    |
| ISM1       | 0.642499961 | 0.008242614 | LRRC29      | -0.865525826 | 0.014038716 |
| USP46      | 0.642440935 | 1.65E-25    | TCAF2       | -0.866065842 | 1.71E-11    |
| SMPDL3B    | 0.642131243 | 4.82E-13    | SEMA4B      | -0.866742251 | 1.61E-73    |
| CHORDC1    | 0.641543708 | 2.28E-43    | ARTN        | -0.867184567 | 7.19E-10    |
| DOC2A      | 0.641274675 | 1.72E-10    | PAPSS2      | -0.867804092 | 1.92E-151   |
| NOB1       | 0.641099301 | 4.75E-65    | FRG1BP      | -0.868529811 | 4.46E-50    |
| TMEM267    | 0.641093785 | 1.67E-12    | AC244090.1  | -0.868683762 | 6.65E-05    |
| YDJC       | 0.640231395 | 5.03E-36    | CLEC2D      | -0.868849695 | 0.000288793 |
| ABCF2_2    | 0.64016963  | 2.81E-82    | ADAMTSL5    | -0.868969608 | 9.82E-08    |
| FAS        | 0.639813746 | 2.35E-17    | SHISA4      | -0.86955969  | 0.026430377 |
| SH3GL3     | 0.639760111 | 0.005991536 | SPACA6      | -0.869866216 | 8.97E-11    |
| NTN1       | 0.639437527 | 1.20E-07    | JPH2        | -0.869869276 | 8.49E-45    |
| CCDC138    | 0.639133439 | 5.88E-08    | LINC00461   | -0.870045254 | 0.013156065 |
| TMEM201    | 0.639083121 | 4.15E-19    | BAIAP2-DT   | -0.870900269 | 4.36E-20    |
| ZNF770     | 0.639036    | 5.95E-34    | PLXDC2      | -0.871721526 | 8.63E-06    |
| SCO1       | 0.638640364 | 6.00E-28    | MTMR11      | -0.871971188 | 2.24E-24    |

|            |             |             |            |              |             |
|------------|-------------|-------------|------------|--------------|-------------|
| EEF1E1     | 0.637936451 | 2.31E-24    | PTGR1      | -0.872095413 | 0.000130396 |
| ZPR1       | 0.637800345 | 5.22E-26    | PLCG1-AS1  | -0.874211284 | 0.026513071 |
| THAP2      | 0.637775063 | 0.001733038 | SLCO3A1    | -0.874340586 | 1.98E-06    |
| EIF3C      | 0.637625689 | 2.10E-21    | CACNG4     | -0.876063866 | 7.89E-21    |
| NUDCD1     | 0.637614988 | 8.08E-59    | CEMIP2     | -0.876307633 | 1.45E-82    |
| KARS1      | 0.637557218 | 3.96E-132   | SEMA4F     | -0.876446997 | 3.21E-10    |
| PTRH1      | 0.637049205 | 1.88E-08    | EFNA2      | -0.876984816 | 0.042813059 |
| EIF3J      | 0.63679699  | 1.23E-62    | PPP2R5B    | -0.87795368  | 1.10E-13    |
| OXNAD1     | 0.636671017 | 2.13E-16    | C5orf38    | -0.878432531 | 2.42E-34    |
| NR6A1      | 0.636395574 | 0.000276722 | PKIB       | -0.878444886 | 8.19E-14    |
| TATDN2P2   | 0.636171531 | 0.017751517 | APCDD1     | -0.879438018 | 0.001794722 |
| TOMM34     | 0.63548982  | 9.56E-49    | SOCS3      | -0.880025898 | 0.009795134 |
| POP7       | 0.635234426 | 3.26E-53    | YPEL3      | -0.880258994 | 2.10E-34    |
| STMN3      | 0.635100687 | 6.07E-05    | SDC2       | -0.880511629 | 3.08E-06    |
| EFNA3      | 0.634813889 | 1.11E-07    | GPX3       | -0.881011253 | 1.85E-15    |
| DDX31      | 0.634742855 | 2.33E-27    | NEDD9      | -0.881173293 | 1.07E-05    |
| NME1       | 0.633271137 | 1.15E-120   | RHOB       | -0.883876153 | 2.77E-77    |
| HSPA9      | 0.633127493 | 5.24E-157   | TMC4       | -0.884179623 | 1.61E-47    |
| PCGF1      | 0.632848483 | 8.98E-14    | EGLN3      | -0.884282104 | 2.49E-32    |
| UCHL5      | 0.632682126 | 6.08E-55    | FUT8-AS1   | -0.884834469 | 0.000732663 |
| GAR1       | 0.632609895 | 3.76E-25    | PTK6       | -0.885390585 | 7.28E-22    |
| AC017083.3 | 0.631927087 | 0.019520858 | RECK       | -0.885922706 | 0.000211943 |
| AC022966.1 | 0.631816225 | 2.81E-44    | KRT223P    | -0.886064591 | 7.33E-07    |
| TEX10      | 0.631516157 | 3.26E-42    | WLS        | -0.886330253 | 0.000129537 |
| SEPTIN6    | 0.631226739 | 0.00967856  | VSIR       | -0.886873025 | 0.018360576 |
| DBF4       | 0.631080003 | 6.36E-44    | AC121757.2 | -0.887866927 | 0.013953691 |
| POLR1A     | 0.630136383 | 4.81E-52    | ABHD17C    | -0.889453496 | 3.90E-92    |
| MRPS23     | 0.630130149 | 2.78E-63    | CYSRT1     | -0.88950985  | 8.00E-14    |
| AC068547.1 | 0.629897174 | 6.51E-08    | MICALL2    | -0.890336121 | 3.55E-66    |
| MRPS5      | 0.629890871 | 2.01E-40    | SNAI3-AS1  | -0.890865193 | 0.003111181 |
| AL445423.3 | 0.629780464 | 0.01833967  | SH3D21     | -0.892782224 | 3.40E-24    |
| SPATA5     | 0.629326955 | 5.64E-08    | AK8        | -0.892827605 | 0.017051425 |
| NADK2      | 0.629163821 | 6.73E-20    | KIF9-AS1   | -0.892856383 | 0.00449598  |
| DCAF4      | 0.629039537 | 5.64E-28    | LMCD1      | -0.89339331  | 5.81E-12    |
| FP565260.1 | 0.628704059 | 8.94E-34    | PDZD7      | -0.89377512  | 0.013618654 |
| NEU3       | 0.628543434 | 1.62E-20    | S100A6     | -0.894486925 | 3.11E-151   |
| NAMPT      | 0.62809735  | 5.94E-96    | FLNA       | -0.895299741 | 2.45E-256   |
| SLC7A6     | 0.627973884 | 7.08E-59    | HLA-DQB1   | -0.896181305 | 1.41E-41    |
| NHP2       | 0.627620323 | 1.50E-118   | LINC00894  | -0.897285063 | 0.012839189 |
| PEX5       | 0.62704597  | 1.52E-43    | CASTOR3    | -0.897808739 | 7.43E-27    |
| C12orf73   | 0.626677426 | 1.16E-07    | GLRX       | -0.897972382 | 0.008949304 |
| PLCG2      | 0.626343272 | 1.78E-05    | SOCS1      | -0.898314788 | 0.027494545 |
| ATXN7L2    | 0.625882342 | 8.96E-08    | OBSL1      | -0.898326442 | 2.35E-139   |
| GART       | 0.624804384 | 2.14E-85    | RAB26      | -0.898357022 | 5.73E-17    |
| CDK5R1     | 0.624463667 | 0.008724759 | ENO2       | -0.901269609 | 6.40E-13    |
| RRS1       | 0.62433157  | 3.34E-31    | COL6A1     | -0.901281316 | 0.000394305 |
| UTP14A     | 0.624211534 | 7.43E-65    | H3C6       | -0.901383683 | 4.38E-08    |

|            |             |             |            |              |             |
|------------|-------------|-------------|------------|--------------|-------------|
| ZDHC23     | 0.623966523 | 1.28E-26    | ALDH1A3    | -0.901938155 | 6.29E-35    |
| RNF138     | 0.623788672 | 1.43E-27    | MDK        | -0.902757541 | 9.75E-44    |
| SMAD6      | 0.623224712 | 1.44E-05    | HMCN1      | -0.903649564 | 6.94E-14    |
| TSKU       | 0.622880195 | 5.76E-07    | TPBG       | -0.903651614 | 1.36E-186   |
| TTC27      | 0.622479206 | 1.03E-22    | PEG10      | -0.904861412 | 7.31E-43    |
| LRPPRC     | 0.62225029  | 8.78E-131   | SCNN1A     | -0.906281445 | 2.47E-09    |
| KIAA0930   | 0.621979912 | 4.98E-41    | TFF3       | -0.907225411 | 3.26E-35    |
| RPARP-AS1  | 0.621816547 | 4.59E-07    | TXNIP      | -0.907662193 | 5.69E-116   |
| EPB41L4B   | 0.621402849 | 5.04E-31    | C8orf58    | -0.907913755 | 1.15E-20    |
| PAM16      | 0.621230152 | 2.11E-18    | UNC5A      | -0.909195701 | 0.000923733 |
| RIOX1      | 0.621043839 | 1.61E-21    | IGSF8      | -0.909547533 | 9.30E-24    |
| ZNF587B    | 0.620982001 | 4.50E-08    | CCN5       | -0.910049317 | 1.20E-116   |
| ADSL       | 0.62013226  | 5.83E-56    | ALDH3B1    | -0.910294607 | 3.96E-32    |
| CNKS3      | 0.619763438 | 2.05E-06    | CNIH2      | -0.910448894 | 3.58E-05    |
| MTFR1      | 0.619344289 | 5.21E-43    | SLC12A6    | -0.910505108 | 1.56E-16    |
| NTPCR      | 0.619226918 | 4.97E-17    | LAMB2      | -0.91069631  | 3.29E-99    |
| SRPX       | 0.619004556 | 0.001756013 | FAM20C     | -0.910734809 | 4.42E-10    |
| LTV1       | 0.618989503 | 8.71E-51    | CDKN2D     | -0.91282336  | 0.000247481 |
| SPESP1     | 0.618813842 | 0.000479072 | HDAC11     | -0.913537942 | 7.38E-16    |
| ANKRD16    | 0.618325076 | 2.10E-08    | LTBP2      | -0.914907994 | 9.45E-09    |
| AC146944.3 | 0.617886863 | 0.009026955 | SERPINA3   | -0.915033639 | 0.000170936 |
| NAA15      | 0.617343617 | 1.11E-68    | BX470102.2 | -0.915462492 | 0.016244534 |
| TBC1D30    | 0.617164309 | 3.16E-46    | PBLD       | -0.916196213 | 2.05E-10    |
| CCNB1IP1   | 0.616475016 | 6.88E-21    | ST6GALNAC4 | -0.916420494 | 3.16E-07    |
| HSPE1-MOB4 | 0.616108044 | 0.000139371 | EGFR       | -0.916509967 | 1.98E-28    |
| SUV39H2    | 0.615950351 | 1.11E-21    | ITGA3      | -0.916688955 | 1.14E-190   |
| SMG1P3     | 0.615870057 | 0.0011639   | TSPAN14    | -0.916795864 | 9.80E-129   |
| NOL11      | 0.61586933  | 3.66E-82    | CBFA2T3    | -0.91796575  | 5.90E-36    |
| POLR3E     | 0.615255415 | 8.49E-45    | AL670729.3 | -0.918292814 | 0.006484422 |
| ME1        | 0.614919884 | 7.53E-32    | MICB       | -0.918952454 | 9.94E-06    |
| TRMT6      | 0.614699304 | 3.94E-16    | AMOTL2     | -0.918999271 | 3.80E-78    |
| GATAD2A    | 0.614625863 | 1.28E-49    | SPATA6     | -0.919589099 | 0.003429369 |
| CIART      | 0.614443675 | 4.66E-09    | LINC00271  | -0.920754106 | 0.020649736 |
| DGKE       | 0.614253959 | 5.21E-20    | CXCR4      | -0.920819249 | 2.11E-70    |
| EEF2KMT    | 0.613661231 | 6.22E-25    | QDPR       | -0.921049977 | 3.19E-14    |
| EDA2R      | 0.612547133 | 7.31E-12    | GALC       | -0.921966375 | 0.002570655 |
| LRRC59     | 0.612308412 | 6.08E-115   | AP001453.5 | -0.922256001 | 0.011644266 |
| SMYD5      | 0.612137848 | 1.44E-20    | PXDC1      | -0.92241945  | 4.07E-07    |
| GUF1       | 0.611495103 | 4.18E-24    | SELENBP1   | -0.922629093 | 5.98E-10    |
| DYRK2      | 0.611493945 | 5.68E-33    | DRC3       | -0.92300212  | 0.000835881 |
| ZBTB44     | 0.61133672  | 1.78E-26    | ISG20      | -0.923100675 | 1.61E-07    |
| DDX18      | 0.611296075 | 9.36E-78    | COL6A2     | -0.924097657 | 6.21E-07    |
| MRPL1      | 0.610928074 | 1.11E-25    | AC016831.6 | -0.924999669 | 0.019410888 |
| FUT10      | 0.610766194 | 1.90E-05    | ABCA7      | -0.925758436 | 1.54E-08    |
| POLR3D     | 0.610509332 | 1.61E-22    | IQCD       | -0.925936353 | 0.000315899 |
| CTSC       | 0.61012671  | 4.51E-18    | LXN        | -0.926241283 | 5.91E-76    |
| RDH13      | 0.609883174 | 4.34E-14    | CLDN9      | -0.927297038 | 2.67E-18    |



|            |             |             |            |              |             |
|------------|-------------|-------------|------------|--------------|-------------|
| PCSK6      | 0.609864788 | 9.48E-13    | AL139385.1 | -0.927847885 | 0.002412509 |
| CUTC       | 0.609743917 | 2.13E-10    | LDHD       | -0.928731085 | 0.000481525 |
| EFHD2      | 0.609392119 | 5.26E-34    | CYP46A1    | -0.928760171 | 0.006167656 |
| ANGEL1     | 0.609297215 | 2.35E-38    | AC010168.2 | -0.929630106 | 6.08E-05    |
| DDX51      | 0.608865927 | 3.29E-19    | PDK4       | -0.930175257 | 0.001941865 |
| ZNF589     | 0.608701642 | 1.65E-06    | MYZAP      | -0.930968755 | 0.000116136 |
| SNHG21     | 0.608494983 | 0.009543184 | AC244197.3 | -0.931273766 | 3.84E-12    |
| GPATCH4    | 0.608186982 | 6.55E-55    | AC007114.1 | -0.931960689 | 0.006258314 |
| CCNJ       | 0.608145    | 3.24E-15    | RTKN2      | -0.932782748 | 5.58E-18    |
| WDR17      | 0.608136246 | 1.14E-05    | AC008014.1 | -0.933739592 | 0.001602725 |
| PSPH       | 0.608047238 | 2.38E-15    | AC007319.1 | -0.933923744 | 0.000385824 |
| KNSTRN     | 0.607451166 | 8.10E-15    | TAT        | -0.934465811 | 0.024263778 |
| SLC27A2    | 0.606728845 | 3.58E-06    | L1CAM      | -0.935518425 | 8.11E-157   |
| TRMU       | 0.606362826 | 2.89E-28    | VAMP1      | -0.935841004 | 4.47E-11    |
| STX6       | 0.606187231 | 2.38E-44    | TFPI       | -0.935995616 | 3.59E-38    |
| SIK1B      | 0.606141004 | 2.62E-17    | AC098582.1 | -0.936345578 | 0.001547279 |
| AC091959.3 | 0.606005315 | 1.65E-05    | IL11       | -0.936512086 | 0.006441311 |
| LYPLA1     | 0.605721762 | 2.05E-50    | ALPK3      | -0.937015054 | 1.39E-23    |
| SDAD1      | 0.605583928 | 2.59E-46    | KRT19      | -0.937316269 | 0           |
| NOP2       | 0.605428289 | 5.08E-60    | MELTF      | -0.937919021 | 5.65E-31    |
| KTI12      | 0.605260079 | 3.48E-08    | ABCC13     | -0.938053056 | 0.010302068 |
| SRM        | 0.604730668 | 8.04E-70    | TMEM45A    | -0.938059815 | 2.03E-07    |
| HSPE1      | 0.604489196 | 3.34E-101   | PRKCA      | -0.938871516 | 2.62E-50    |
| MAD2L1     | 0.604402663 | 1.30E-42    | TLCD2      | -0.940365015 | 5.69E-10    |
| BEGAIN     | 0.604123458 | 0.037568782 | RAI2       | -0.94039923  | 0.009458437 |
| CDK8       | 0.603634562 | 9.11E-24    | AC007686.3 | -0.940807301 | 0.00646438  |
| PRXL2C     | 0.603501815 | 5.65E-13    | GRAMD2B    | -0.942216245 | 6.64E-27    |
| ZNF711     | 0.602768933 | 0.026209687 | SLC66A3    | -0.943325067 | 2.78E-22    |
| ALKBH8     | 0.602265111 | 1.16E-09    | C1QTNF6    | -0.944848252 | 1.42E-172   |
| LSM11      | 0.601962726 | 4.85E-11    | AC080112.5 | -0.946294338 | 0.011450665 |
| NAA50      | 0.601209222 | 2.53E-118   | SMPD1      | -0.9470936   | 5.21E-48    |
| PPIH       | 0.600922429 | 9.69E-11    | PAPLN      | -0.947335528 | 4.30E-06    |
| ZNF420     | 0.600153404 | 7.03E-05    | DNMBP      | -0.948378967 | 2.58E-25    |
| LIMK2      | 0.59964608  | 6.44E-24    | CLTCL1     | -0.948696299 | 3.10E-06    |
| AHSA1      | 0.599407201 | 8.45E-98    | AC027601.1 | -0.948775965 | 2.55E-05    |
| SKA3       | 0.599368935 | 2.71E-19    | SLC25A24   | -0.949536308 | 6.21E-182   |
| AK2        | 0.598934584 | 2.39E-75    | F2R        | -0.949612869 | 2.19E-12    |
| PACRGL     | 0.597765284 | 2.39E-08    | NAV2       | -0.950461217 | 8.02E-228   |
| MAX        | 0.597293167 | 5.01E-38    | ITGB4      | -0.950679306 | 2.32E-144   |
| LETM1      | 0.596983911 | 1.18E-53    | ST8SIA6    | -0.952005756 | 1.63E-36    |
| IGSF9      | 0.59696201  | 8.55E-16    | S100A14    | -0.952244757 | 6.10E-21    |
| MRM1       | 0.596326208 | 8.43E-07    | ENTPD2     | -0.953706738 | 5.27E-06    |
| MTPAP      | 0.596008282 | 1.23E-21    | PRKD1      | -0.954106337 | 1.98E-11    |
| PRELID1    | 0.595124856 | 9.06E-121   | KIFC3      | -0.955099418 | 3.43E-27    |
| NOP58      | 0.594506309 | 2.55E-63    | CTSK       | -0.955309572 | 0.000235557 |
| MAPT       | 0.594430596 | 2.02E-13    | ARRDC3     | -0.955568309 | 8.21E-14    |
| PROCR      | 0.594067877 | 9.29E-05    | POLD4      | -0.955761686 | 1.08E-39    |

|          |             |             |            |              |             |
|----------|-------------|-------------|------------|--------------|-------------|
| ZNF593   | 0.594055967 | 1.12E-12    | COL5A2     | -0.956109197 | 3.18E-13    |
| RHBDF2   | 0.593583217 | 8.54E-24    | GPR137C    | -0.956369915 | 5.23E-05    |
| MAP7D3   | 0.593387927 | 1.44E-28    | KPNA7      | -0.956485881 | 0.012121951 |
| XRCC2    | 0.592957222 | 1.47E-18    | NAALADL2   | -0.95683193  | 0.001614339 |
| TUFM     | 0.59283605  | 1.50E-136   | MICAL1     | -0.95688843  | 6.57E-25    |
| GRK3     | 0.592503558 | 1.72E-06    | ADAMTS13   | -0.956889981 | 2.85E-12    |
| DTWD1    | 0.592445594 | 7.69E-23    | TNFAIP2    | -0.957459144 | 0.00081734  |
| TSFM     | 0.59202564  | 1.13E-30    | PDGFB      | -0.95765405  | 3.17E-35    |
| SERTAD2  | 0.591914472 | 4.33E-14    | SLITRK6    | -0.959831342 | 1.83E-11    |
| IFRD2    | 0.591628926 | 4.78E-42    | PDE11A_1   | -0.961418463 | 8.79E-05    |
| MARC1    | 0.591469642 | 3.63E-11    | FAM110C    | -0.961709228 | 1.24E-54    |
| GRWD1    | 0.591395189 | 1.45E-29    | BCAR3      | -0.962888577 | 4.38E-32    |
| ATP5MC1  | 0.591322727 | 9.70E-32    | PALM2AKAP2 | -0.963292626 | 0.000748492 |
| C16orf91 | 0.590428991 | 3.55E-12    | KRT7       | -0.964202122 | 1.06E-93    |
| WDR97    | 0.589871455 | 3.94E-08    | ABTB1      | -0.964312542 | 1.91E-13    |
| TFAM     | 0.589805993 | 5.21E-53    | IER3       | -0.964969614 | 1.01E-122   |
| PDCD5    | 0.589749901 | 3.66E-28    | IFITM10    | -0.965167253 | 1.64E-07    |
| TMEM102  | 0.589707917 | 6.99E-08    | RHCG       | -0.966079894 | 0.009470302 |
| KIAA1958 | 0.589471964 | 3.82E-12    | PRR36      | -0.967624485 | 0.000280882 |
| ATP13A3  | 0.589058264 | 9.49E-91    | CPE        | -0.967664415 | 1.55E-66    |
| GTF2H2B  | 0.58845236  | 0.000205951 | STX1B      | -0.967690177 | 0.000545376 |
| MFHAS1   | 0.588087285 | 3.19E-20    | SPOCK1     | -0.968651476 | 4.35E-31    |
| MRPS31   | 0.587623087 | 1.09E-09    | TSPAN5     | -0.96938097  | 1.99E-26    |
| THAP11   | 0.587357086 | 8.51E-26    | PGM5       | -0.97044187  | 2.08E-07    |
| SPG21    | 0.587122198 | 7.59E-43    | SEC14L2    | -0.970773417 | 2.62E-18    |
| PPT2     | 0.58708764  | 2.54E-13    | PRR15      | -0.971861725 | 1.40E-12    |
| ZBED6CL  | 0.586971301 | 2.35E-06    | SNED1      | -0.972108894 | 4.72E-06    |
| FBXL4    | 0.586507277 | 1.07E-09    | DDX60L     | -0.97211796  | 1.73E-05    |
| POLH     | 0.586386105 | 1.99E-24    | APH1B      | -0.972855203 | 3.41E-09    |
| ZNF114   | 0.586378042 | 0.000508406 | TUBA1A     | -0.97326681  | 6.15E-57    |
| CDC25A   | 0.585677141 | 2.05E-09    | GLB1L      | -0.974404571 | 1.20E-06    |
| DKC1     | 0.585016179 | 1.65E-73    | SLC22A18   | -0.976026624 | 8.29E-20    |
| EXOSC3   | 0.585003207 | 3.83E-19    | AL390038.1 | -0.978415654 | 4.33E-06    |
|          |             |             | MRPL23-AS1 | -0.979556013 | 0.000102776 |
|          |             |             | SLC16A4    | -0.980850952 | 1.32E-05    |
|          |             |             | PBXIP1     | -0.98137028  | 9.20E-63    |
|          |             |             | FAM102B    | -0.982653882 | 3.90E-123   |
|          |             |             | GTF2IRD2   | -0.982910374 | 1.05E-10    |
|          |             |             | PRICKLE2   | -0.983628768 | 2.27E-05    |
|          |             |             | ATP1B1     | -0.983722545 | 2.20E-39    |
|          |             |             | H2BC21     | -0.983772757 | 9.96E-63    |
|          |             |             | SPAG4      | -0.984325929 | 5.58E-11    |
|          |             |             | DNAH1      | -0.984428587 | 0.000550516 |
|          |             |             | EFHD1      | -0.984444481 | 3.52E-11    |
|          |             |             | LHX2       | -0.984671399 | 0.000551853 |
|          |             |             | CCDC151    | -0.98527942  | 0.008917696 |
|          |             |             | MATN3      | -0.987212831 | 0.002850517 |

|            |              |             |
|------------|--------------|-------------|
| PRKAA2     | -0.987329188 | 4.70E-05    |
| MAP1B      | -0.987854508 | 0.000121004 |
| TGFB2      | -0.988153124 | 1.81E-08    |
| PTK2B      | -0.988292689 | 3.59E-07    |
| ABLIM2     | -0.988604986 | 0.009055127 |
| FAM114A1   | -0.988712158 | 1.91E-13    |
| AP001816.1 | -0.990193617 | 1.99E-13    |
| AHRR_1     | -0.990773281 | 0.001468151 |
| PTPRE      | -0.991138641 | 5.04E-24    |
| PCOLCE     | -0.991553475 | 3.08E-14    |
| SLC25A42   | -0.992770357 | 2.50E-17    |
| DAPK2      | -0.994320251 | 1.32E-28    |
| FOS        | -0.995003681 | 4.20E-105   |
| TNS1       | -0.995968468 | 1.69E-05    |
| VPS9D1     | -0.99794637  | 2.77E-13    |
| FRMD3      | -0.999505025 | 0.003374447 |
| MUC20      | -0.999806002 | 2.03E-19    |
| TRGC1      | -0.99986839  | 1.01E-36    |
| FIBCD1     | -1.000022068 | 2.43E-105   |
| NRM        | -1.000185505 | 4.15E-08    |
| EBF4       | -1.000551535 | 0.000425287 |
| TCEAL3     | -1.001992229 | 1.70E-40    |
| CRIP1      | -1.002417344 | 0.000890266 |
| NHS        | -1.002643713 | 3.22E-82    |
| ANXA3      | -1.003647517 | 1.99E-29    |
| GNG7       | -1.003819604 | 3.57E-07    |
| EDN1       | -1.005038854 | 2.01E-08    |
| SELENOM    | -1.005531153 | 0.000596863 |
| LONRF3     | -1.005566162 | 8.07E-16    |
| ALOXE3     | -1.005712794 | 3.64E-07    |
| SCART1     | -1.006196872 | 1.49E-05    |
| DMPK       | -1.006881081 | 4.34E-161   |
| AC016682.1 | -1.008363858 | 1.59E-05    |
| AC126564.1 | -1.008464125 | 8.31E-07    |
| AC108047.1 | -1.008513247 | 0.000892911 |
| DNAJB5     | -1.008802244 | 0.000100931 |
| IRS2       | -1.008819057 | 2.13E-21    |
| NEURL1B    | -1.009135013 | 1.22E-12    |
| ZNF365     | -1.009148876 | 5.39E-19    |
| ARHGAP33   | -1.010088353 | 2.59E-09    |
| PLEKHG2    | -1.010525335 | 1.89E-28    |
| RHOBTB2    | -1.012162691 | 7.32E-103   |
| EHD2       | -1.01443977  | 1.90E-20    |
| GFRA1      | -1.014840712 | 0.004963315 |
| TOX2       | -1.015313208 | 2.20E-05    |
| NPAS2      | -1.015926959 | 1.58E-102   |
| AL137003.1 | -1.016765684 | 0.000214257 |

|                  |              |             |
|------------------|--------------|-------------|
| AL359258.2       | -1.01783557  | 2.43E-07    |
| SLC22A17         | -1.019723291 | 1.31E-06    |
| RAB9B            | -1.020043195 | 4.81E-08    |
| AL590004.3       | -1.021572059 | 3.16E-34    |
| MLPH             | -1.022413585 | 6.98E-290   |
| MIR210HG         | -1.022727    | 9.46E-10    |
| GMDS-DT          | -1.022773873 | 0.000790462 |
| AC021066.1       | -1.023463513 | 9.23E-70    |
| AC099568.2       | -1.025514789 | 0.008239526 |
| PLAUR            | -1.025937542 | 8.21E-19    |
| GPR37L1          | -1.026318975 | 2.32E-13    |
| PLD1             | -1.027938937 | 5.90E-17    |
| ANXA1            | -1.028417516 | 3.37E-05    |
| TENT5C           | -1.028640778 | 2.26E-10    |
| LINC00888        | -1.028706258 | 4.44E-09    |
| GLP2R            | -1.028962635 | 1.20E-06    |
| BEST1            | -1.032013674 | 0.002395962 |
| HEG1             | -1.032582507 | 1.22E-08    |
| VAMP5            | -1.03408942  | 2.79E-05    |
| MEIS3            | -1.036137348 | 1.33E-16    |
| ECHDC2           | -1.036708777 | 1.68E-32    |
| SEMA5B           | -1.038898576 | 7.49E-27    |
| SNTB1            | -1.039035439 | 1.27E-18    |
| BDKRB2           | -1.040306358 | 3.33E-20    |
| RUNX2            | -1.043052613 | 6.43E-08    |
| AC144450.1       | -1.043475692 | 1.67E-09    |
| ADAM12           | -1.043770662 | 0.001081413 |
| CTSO             | -1.044994418 | 8.04E-11    |
| LINC01963        | -1.046112042 | 2.95E-08    |
| AC007541.1       | -1.046952814 | 0.003896249 |
| LINC00365        | -1.047663425 | 1.27E-12    |
| LINC01257        | -1.04788999  | 0.000375019 |
| TMEM40           | -1.049124762 | 3.09E-10    |
| MPZL2            | -1.049233801 | 4.67E-39    |
| AC015802.6       | -1.049324559 | 0.00046244  |
| TMOD1            | -1.050658582 | 0.000395969 |
| KLK6             | -1.050856687 | 2.36E-05    |
| IZUMO4           | -1.055242628 | 0.008899422 |
| SCX              | -1.05527439  | 1.22E-10    |
| PPP1R14B-<br>AS1 | -1.055417683 | 5.56E-07    |
| CAPN9            | -1.056566936 | 0.000424543 |
| CGNL1            | -1.057216749 | 0.000214069 |
| DDAH2            | -1.057328587 | 6.52E-45    |
| DOK7             | -1.058078925 | 2.64E-18    |
| LOXL2            | -1.058174411 | 2.71E-241   |
| PTAFR            | -1.05888192  | 1.98E-09    |

|            |              |             |
|------------|--------------|-------------|
| COL4A5     | -1.059423019 | 1.35E-12    |
| RET        | -1.060030859 | 3.55E-11    |
| SDCBP2     | -1.060098688 | 0.000240587 |
| C5         | -1.063425723 | 1.57E-17    |
| C14orf132  | -1.065733449 | 3.63E-155   |
| LMO7       | -1.066062477 | 4.37E-104   |
| GSN        | -1.066410336 | 5.17E-201   |
| CD109      | -1.067613808 | 1.07E-116   |
| PLTP       | -1.070087861 | 0.00345868  |
| AC023158.1 | -1.070456043 | 3.50E-12    |
| MAN1C1     | -1.070583723 | 0.004601515 |
| NRCAM      | -1.072411925 | 1.22E-55    |
| ITGA5      | -1.073936569 | 1.69E-54    |
| PDGFC      | -1.077228469 | 0.000733653 |
| IGFBP3     | -1.077763884 | 1.63E-21    |
| IGFBP4     | -1.078732076 | 4.07E-38    |
| ZG16B      | -1.081072758 | 1.38E-22    |
| ST8SIA4    | -1.083059048 | 0.003391242 |
| TNFRSF11B  | -1.083891233 | 6.78E-13    |
| CHST3      | -1.085332146 | 9.61E-08    |
| STIMATE-   |              |             |
| MUSTN1     | -1.086080326 | 0.00210221  |
| TLE6       | -1.087518153 | 0.005320396 |
| ZNF185     | -1.088096722 | 1.08E-73    |
| SCNN1D     | -1.089371517 | 0.000448474 |
| SEMA3C     | -1.090043891 | 1.04E-241   |
| EFEMP2     | -1.090395031 | 0.004046018 |
| RAP1GAP    | -1.090475729 | 4.19E-51    |
| AC068580.4 | -1.092007569 | 1.56E-26    |
| EGR3       | -1.093050655 | 1.07E-10    |
| SYT16      | -1.09646784  | 0.001484698 |
| GSTM2      | -1.098980578 | 0.000280419 |
| MKRN2OS    | -1.099477362 | 0.000206982 |
| SLFN5      | -1.099787386 | 5.74E-12    |
| CEACAM6    | -1.102473991 | 4.88E-48    |
| AL359258.1 | -1.104058469 | 4.15E-08    |
| PKD1L2     | -1.104562169 | 2.05E-08    |
| AC141930.1 | -1.104962347 | 0.000835594 |
| PROS1      | -1.106948478 | 0.000204389 |
| C9orf106   | -1.107422057 | 0.00448266  |
| LIPA       | -1.109658024 | 9.55E-67    |
| SYNGR3     | -1.11209336  | 3.21E-14    |
| GDPD5      | -1.11216413  | 1.33E-14    |
| DLGAP1-AS1 | -1.112729821 | 0.001422376 |
| PRSS23     | -1.11723797  | 1.78E-109   |
| PLA2G10    | -1.120022879 | 0.000733887 |
| DAB2       | -1.121634062 | 9.00E-21    |

|            |              |             |
|------------|--------------|-------------|
| ARHGDIB    | -1.121737641 | 4.07E-05    |
| BMERB1     | -1.123382284 | 1.67E-29    |
| ULBP2      | -1.124015059 | 2.34E-32    |
| GOLGA8O    | -1.126440899 | 0.001031885 |
| LRRC6      | -1.128301382 | 0.00051614  |
| PTPRM      | -1.128370629 | 3.78E-52    |
| ADCY5      | -1.129533817 | 1.29E-134   |
| SUSD2      | -1.130089197 | 4.98E-05    |
| MAPK11     | -1.130743871 | 7.04E-27    |
| TRIB2      | -1.13192809  | 1.34E-10    |
| BTC        | -1.133938722 | 5.99E-24    |
| RAB4B      | -1.134894557 | 6.84E-12    |
| B4GALT1    | -1.135252171 | 0           |
| TTLL7      | -1.135319326 | 1.12E-05    |
| CMAHP      | -1.135651931 | 0.000437268 |
| ARNT2      | -1.136509844 | 2.66E-99    |
| CMYA5      | -1.138140419 | 3.77E-19    |
| PTGS1      | -1.138394802 | 7.33E-07    |
| MST1       | -1.14121229  | 1.81E-05    |
| ABAT       | -1.146611152 | 8.50E-104   |
| KLF6       | -1.147226429 | 1.04E-39    |
| F2RL1      | -1.147295497 | 1.63E-97    |
| RTN2       | -1.14951986  | 1.00E-07    |
| ATP2A3     | -1.150029201 | 0           |
| ANGPTL4    | -1.151240036 | 5.33E-69    |
| TMEM8B     | -1.151384572 | 2.98E-07    |
| CAPS       | -1.151447867 | 0.000175171 |
| MEGF6      | -1.151616883 | 1.98E-93    |
| LTC4S      | -1.152400114 | 0.000897201 |
| PHLDA1     | -1.154182732 | 6.63E-77    |
| PYROXD2    | -1.160254415 | 6.02E-18    |
| TMEM45B    | -1.161873964 | 8.47E-71    |
| PCDHAC2    | -1.168865494 | 1.66E-07    |
| FER1L4     | -1.169828295 | 3.61E-148   |
| MYEOV      | -1.169836743 | 7.55E-144   |
| ITGB5      | -1.174251226 | 1.26E-271   |
| SLC22A18AS | -1.177415889 | 1.30E-09    |
| CCDC96     | -1.177509277 | 1.70E-05    |
| CLCF1      | -1.177573282 | 2.79E-19    |
| EFEMP1     | -1.177860876 | 3.79E-38    |
| AC079834.2 | -1.177910295 | 0.00104899  |
| TUBB3      | -1.178830627 | 3.92E-247   |
| DOCK2      | -1.178978199 | 8.45E-05    |
| HPGD       | -1.180220522 | 0.001099621 |
| AP003419.1 | -1.181444875 | 9.94E-10    |
| VSIG10L    | -1.181981393 | 1.13E-08    |
| RPS6KA2    | -1.184820223 | 1.92E-30    |

|            |              |             |
|------------|--------------|-------------|
| CLU        | -1.185349236 | 0           |
| SERPINA11  | -1.188857794 | 2.86E-08    |
| CAPN2      | -1.191341575 | 7.58E-54    |
| FAM155A    | -1.191933603 | 0.001189207 |
| CD59       | -1.193552792 | 0           |
| MAP2       | -1.193633317 | 1.97E-13    |
| AC080112.4 | -1.196171133 | 2.63E-05    |
| CDK14      | -1.199142492 | 0.001313388 |
| SYTL5      | -1.199749516 | 2.80E-56    |
| FN1        | -1.201151436 | 1.60E-178   |
| CCDC9B     | -1.202624691 | 0.00013118  |
| VTCN1      | -1.203481776 | 9.88E-46    |
| TMSB4X     | -1.204811158 | 0           |
| AC011498.7 | -1.204940624 | 0.001046642 |
| REEP1      | -1.205738723 | 5.04E-08    |
| LYPD1      | -1.21214165  | 2.13E-06    |
| CCN2       | -1.215564154 | 0.00014635  |
| LAMA3      | -1.216635466 | 1.82E-12    |
| ALOX5AP    | -1.223346324 | 0.000496447 |
| COL12A1    | -1.223594157 | 5.50E-30    |
| CASTOR1    | -1.229525006 | 1.82E-05    |
| ALOX5      | -1.232539765 | 4.59E-09    |
| SYT8       | -1.233330633 | 6.41E-07    |
| NTN4       | -1.234345408 | 9.70E-145   |
| PSCA       | -1.234396006 | 6.36E-07    |
| SCN1B      | -1.234735123 | 2.61E-12    |
| SYTL4      | -1.24133737  | 3.29E-25    |
| ITGB6      | -1.242533251 | 7.96E-266   |
| RASSF8-AS1 | -1.244687642 | 6.26E-07    |
| TFF1       | -1.245883689 | 9.31E-23    |
| CLIC3      | -1.245945578 | 1.84E-88    |
| TP53INP2   | -1.24907749  | 1.70E-82    |
| EMP1       | -1.249907866 | 7.07E-07    |
| KCNN4      | -1.253764819 | 5.01E-75    |
| DUSP4      | -1.254188752 | 1.58E-74    |
| NR2F1      | -1.259284788 | 1.65E-72    |
| PLCH2      | -1.263478641 | 3.71E-05    |
| MIR9-3HG   | -1.26571405  | 1.16E-26    |
| MB         | -1.26725239  | 8.28E-37    |
| LYPD3      | -1.268122398 | 1.00E-84    |
| LAMB3      | -1.269892112 | 1.15E-27    |
| SLC25A24P1 | -1.270139376 | 1.53E-08    |
| CAMK2N1    | -1.270648861 | 0           |
| TSPAN1     | -1.272903002 | 3.67E-39    |
| MYO16      | -1.273528105 | 8.70E-07    |
| MYPN       | -1.276091327 | 2.70E-22    |
| CALML5     | -1.277680716 | 5.38E-05    |

|            |              |             |
|------------|--------------|-------------|
| IL1RAPL2   | -1.277802717 | 1.15E-05    |
| GSTM4      | -1.281498702 | 6.88E-27    |
| C15orf48   | -1.283533152 | 3.71E-06    |
| TIMP2      | -1.284146669 | 1.95E-66    |
| MAGED4     | -1.285774771 | 0.001826075 |
| AC135048.1 | -1.288238981 | 0.000185801 |
| AGAP11     | -1.292992034 | 3.42E-05    |
| AC005077.4 | -1.293081673 | 5.00E-05    |
| DBN1       | -1.298708056 | 9.56E-95    |
| CYP26B1    | -1.299260435 | 6.30E-10    |
| IL18       | -1.301257706 | 1.02E-07    |
| DUSP6      | -1.302924888 | 2.33E-09    |
| FGD5       | -1.303308336 | 1.61E-14    |
| C1orf116   | -1.312235834 | 0.001382223 |
| ADORA1     | -1.312296535 | 6.04E-08    |
| DUSP5      | -1.312830961 | 6.21E-28    |
| PADI1      | -1.314075751 | 7.21E-29    |
| SHISA2     | -1.314141156 | 4.13E-06    |
| LINC00346  | -1.314439316 | 0.000185734 |
| AC007743.1 | -1.315741157 | 9.13E-05    |
| MVP        | -1.325585211 | 6.97E-107   |
| ZMAT1      | -1.328951239 | 7.06E-08    |
| MXRA7      | -1.329116652 | 7.54E-08    |
| TNIK       | -1.329373427 | 4.72E-11    |
| SSPN       | -1.331643398 | 3.18E-23    |
| ITGA2      | -1.336844923 | 4.80E-281   |
| AC068580.3 | -1.341007567 | 1.73E-10    |
| MDGA2      | -1.341961538 | 3.52E-08    |
| LMNTD2-AS1 | -1.344957686 | 6.65E-11    |
| MUC1       | -1.348592537 | 9.96E-58    |
| MYO15B     | -1.350039951 | 2.98E-30    |
| PWWP3B     | -1.35308147  | 4.14E-08    |
| SMOC1      | -1.354862021 | 1.01E-10    |
| AC006372.1 | -1.356667321 | 1.77E-06    |
| KRT15      | -1.356759747 | 2.25E-38    |
| ARHGEF40   | -1.358442972 | 9.12E-07    |
| IGF2       | -1.365256653 | 5.41E-06    |
| AREG       | -1.368436787 | 1.85E-51    |
| TLE4       | -1.368780983 | 5.10E-09    |
| SPNS2      | -1.368883157 | 6.60E-254   |
| AC110619.1 | -1.368936564 | 4.34E-43    |
| LY6D       | -1.371104347 | 1.56E-07    |
| TRIM6      | -1.372444927 | 1.80E-05    |
| WSCD1      | -1.37301073  | 0.000111794 |
| INHA       | -1.375529241 | 1.69E-23    |
| LOXL1-AS1  | -1.375657052 | 1.09E-32    |
| GIPR       | -1.377182384 | 6.61E-06    |



|            |              |             |
|------------|--------------|-------------|
| NT5E       | -1.382575044 | 1.60E-116   |
| TH         | -1.383183828 | 8.57E-11    |
| ITGA6      | -1.383458878 | 4.01E-63    |
| TMEM139    | -1.383828717 | 1.38E-09    |
| AGR2       | -1.389380168 | 6.59E-189   |
| CTSD       | -1.393175573 | 1.17E-147   |
| FSCN2      | -1.396255501 | 7.92E-08    |
| SNAI2      | -1.39706152  | 6.03E-13    |
| AC144831.1 | -1.397938462 | 5.64E-12    |
| SPEG       | -1.40492618  | 5.82E-14    |
| TRIM29     | -1.407244799 | 1.76E-42    |
| SEMA5A     | -1.410663254 | 1.18E-12    |
| ABCA4      | -1.414487154 | 2.21E-58    |
| SEMA3B     | -1.42182957  | 6.68E-134   |
| NR2F1-AS1  | -1.424046756 | 1.82E-30    |
| C19orf33   | -1.430253452 | 3.26E-80    |
| SERPINE1   | -1.44785977  | 4.50E-06    |
| PADI3      | -1.448725241 | 7.80E-21    |
| MST1R      | -1.450151216 | 9.56E-27    |
| KIAA1210   | -1.47651881  | 7.66E-47    |
| MGP        | -1.481671255 | 1.75E-65    |
| AL359258.3 | -1.487667441 | 1.93E-08    |
| PADI2      | -1.489907634 | 5.04E-55    |
| LGALS1     | -1.495955713 | 4.03E-269   |
| ANOS1      | -1.502916068 | 1.57E-09    |
| GREB1      | -1.505236579 | 0.003298798 |
| AL354740.1 | -1.507407552 | 5.63E-08    |
| THSD4      | -1.508972917 | 4.61E-156   |
| EFR3B      | -1.514173541 | 1.89E-18    |
| STEAP4     | -1.517424097 | 8.18E-40    |
| LINC02747  | -1.518237904 | 4.75E-13    |
| ABCC3      | -1.523152162 | 0           |
| CDH5       | -1.525819687 | 4.57E-13    |
| BANK1      | -1.526951352 | 8.46E-11    |
| BEX5       | -1.538050173 | 4.76E-13    |
| CEACAM5    | -1.553352993 | 3.83E-06    |
| SLC1A1     | -1.570638826 | 2.21E-06    |
| AC006372.2 | -1.578424464 | 1.49E-21    |
| TCIM       | -1.585160411 | 4.90E-51    |
| SLC34A3    | -1.586044103 | 4.87E-07    |
| MT2A       | -1.590291053 | 1.98E-175   |
| ST6GALNAC2 | -1.590832707 | 6.20E-37    |
| PLAU       | -1.595981565 | 2.28E-06    |
| GLRA3      | -1.598434811 | 6.35E-22    |
| AL157935.2 | -1.600207141 | 2.13E-06    |
| EDIL3      | -1.603923183 | 9.41E-78    |
| NBPF4      | -1.615014793 | 4.32E-60    |

|            |              |           |
|------------|--------------|-----------|
| LINC02015  | -1.629046717 | 9.28E-13  |
| EPGN       | -1.636755785 | 1.40E-21  |
| MIR503HG   | -1.63884573  | 2.42E-23  |
| COL5A1     | -1.645493624 | 1.75E-163 |
| LAMC2      | -1.65792692  | 2.39E-83  |
| LHFPL6     | -1.665586801 | 5.35E-107 |
| SLC16A2    | -1.67723997  | 2.36E-18  |
| MALL       | -1.688436007 | 0         |
| PLXNA2     | -1.688876036 | 2.36E-26  |
| KRT87P     | -1.719505073 | 4.45E-14  |
| CAPN8      | -1.726291568 | 1.59E-89  |
| IL1R2      | -1.735584545 | 4.03E-07  |
| WNT9A      | -1.743968325 | 9.76E-08  |
| ZNF175     | -1.77143255  | 1.04E-111 |
| SLCO2A1    | -1.77904464  | 1.20E-66  |
| LOXL1      | -1.79377765  | 2.79E-30  |
| RASD1      | -1.795056556 | 4.30E-67  |
| INHBA      | -1.802737    | 3.47E-45  |
| ITGB2      | -1.81361342  | 6.95E-32  |
| AC010735.2 | -1.814787546 | 1.72E-18  |
| CEMIP      | -1.815763871 | 7.77E-134 |
| BHLHE41    | -1.857791935 | 6.24E-51  |
| SH3PXD2A   | -1.875814987 | 1.91E-13  |
| AQP3       | -1.900488735 | 0         |
| KRT81      | -1.950926333 | 8.78E-232 |
| CRAT       | -2.076159493 | 1.98E-19  |
| PARM1      | -2.082062945 | 1.41E-36  |
| MAPK4      | -2.093529367 | 2.45E-12  |
| LRRC15     | -2.12138021  | 3.36E-223 |
| NBPF6      | -2.197294403 | 4.67E-12  |
| MUC5B      | -2.251527635 | 5.86E-37  |
| PTGES      | -2.305958301 | 1.98E-25  |
| PHLDB2     | -2.31875021  | 3.49E-43  |
| KRT16      | -2.384858374 | 8.04E-77  |

**Table S6:** mRNAs significantly up- or downregulated ( $\geq 1.5$ x fold change) in MCF-7/pRTR-c-MYC cells (AP4 KO/p53 wild-type).

| Significantly up-regulated mRNAs |                              |          | Significantly down-regulated mRNAs |                              |           |
|----------------------------------|------------------------------|----------|------------------------------------|------------------------------|-----------|
| Gene symbol                      | Log <sub>2</sub> fold change | padj     | Gene symbol                        | Log <sub>2</sub> fold change | padj      |
| MYC                              | 3.28722142                   | 0.004774 | NUF2                               | -0.585194531                 | 0.019781  |
| AC026786.1                       | 3.067044988                  | 0.007369 | HMMR                               | -0.585649869                 | 0.0002701 |
| GAL                              | 2.895081475                  | 7.91E-07 | ARL6IP1                            | -0.586071579                 | 1.68E-10  |
| CR2                              | 2.893193773                  | 0.003379 | TNRC6C-AS1                         | -0.586342387                 | 0.0048751 |
| FABP5                            | 2.827023559                  | 3.26E-05 | ENO2                               | -0.586561705                 | 0.0048265 |
| USP2-AS1                         | 2.764689266                  | 0.000323 | RIMS4                              | -0.58667388                  | 0.0006572 |
| CPNE7                            | 2.708385505                  | 6.36E-05 | EIF2AK3                            | -0.586834017                 | 2.67E-11  |
| PDE4A                            | 2.462555678                  | 0.000161 | MMUT                               | -0.587238821                 | 3.43E-08  |
| GPD1                             | 2.401137118                  | 0.005829 | FARP1                              | -0.58763445                  | 1.20E-13  |
| WNT10B                           | 2.377748655                  | 0.002143 | UBALD2                             | -0.58769105                  | 6.44E-08  |
| DUSP2                            | 2.164117992                  | 3.17E-05 | ILK                                | -0.587856789                 | 8.10E-07  |
| AC040162.1                       | 2.043756195                  | 5.21E-07 | ITGA6                              | -0.588262834                 | 0.0087272 |
| MATK                             | 2.03481721                   | 6.54E-07 | CYTH2                              | -0.588590914                 | 1.70E-10  |
| HOXC8                            | 1.897315082                  | 1.39E-09 | TJP3                               | -0.588844155                 | 4.96E-05  |
| TRPM6                            | 1.889774923                  | 2.87E-08 | TTC30A                             | -0.589001424                 | 0.0008014 |
| DNAH17-AS1                       | 1.858670302                  | 1.52E-07 | SDHAP3                             | -0.589062408                 | 0.0221487 |
| TMEM52                           | 1.853805859                  | 2.94E-15 | DUSP18                             | -0.589134763                 | 0.0037348 |
| KCNQ4                            | 1.844297876                  | 5.33E-11 | RAD51AP1                           | -0.589136739                 | 0.0037607 |
| TBC1D4                           | 1.820300463                  | 0.000297 | KIF14                              | -0.589272508                 | 5.55E-05  |
| SLC16A1                          | 1.818299478                  | 1.12E-05 | ZNF718                             | -0.589377836                 | 0.0002968 |
| POLR3G                           | 1.817744895                  | 2.60E-06 | SORT1                              | -0.589678644                 | 5.44E-18  |
| HS3ST3B1                         | 1.798972438                  | 4.60E-10 | PALM                               | -0.58981179                  | 2.24E-08  |
| HPDL                             | 1.794283491                  | 6.98E-34 | AC067930.8                         | -0.589929475                 | 0.0303275 |
| ADGRE2                           | 1.784735316                  | 5.36E-13 | OSCP1                              | -0.590081749                 | 0.0288053 |
| AC007342.4                       | 1.78282138                   | 5.63E-11 | ALCAM                              | -0.590295472                 | 7.03E-12  |
| PCOLCE2                          | 1.772590627                  | 3.75E-05 | SDSL                               | -0.590624219                 | 0.0002452 |
| RPP25                            | 1.748080926                  | 1.82E-37 | C2orf68                            | -0.590678067                 | 2.61E-07  |
| PLD6                             | 1.735383838                  | 4.24E-19 | PPP2R3A                            | -0.590702838                 | 6.05E-05  |
| SORD                             | 1.725743307                  | 1.36E-09 | SGCB                               | -0.591068966                 | 6.58E-06  |
| SNAI1                            | 1.702042049                  | 9.32E-06 | SLX4                               | -0.59109456                  | 1.34E-05  |
| SORD2P                           | 1.683398855                  | 5.59E-06 | KIAA1324L                          | -0.59122286                  | 6.68E-11  |
| NR1D1                            | 1.67222758                   | 2.16E-12 | CENPF                              | -0.591387104                 | 4.13E-08  |
| EFCAB10                          | 1.670373525                  | 8.62E-07 | OPTN                               | -0.591441975                 | 2.61E-09  |
| EN2                              | 1.666839744                  | 2.33E-18 | BCAM                               | -0.591621365                 | 3.34E-06  |
| SLC27A5                          | 1.664851052                  | 1.57E-34 | MARCHF2                            | -0.592245745                 | 2.44E-05  |
| FJX1                             | 1.651654105                  | 2.49E-25 | KIF11                              | -0.592671584                 | 4.87E-06  |
| CENPV                            | 1.646990504                  | 4.18E-12 | MRC2                               | -0.592766849                 | 3.42E-05  |
| EMSLR                            | 1.639336351                  | 1.97E-45 | SP1                                | -0.592789614                 | 7.35E-16  |
| PPARGC1B                         | 1.599259412                  | 3.83E-13 | KIF2C                              | -0.592820248                 | 8.48E-05  |
| TERT                             | 1.58946981                   | 1.38E-05 | AL499602.1                         | -0.592967326                 | 0.002566  |

|            |             |          |            |              |           |
|------------|-------------|----------|------------|--------------|-----------|
| MIR17HG    | 1.575170715 | 3.98E-05 | ZIC4       | -0.593104782 | 0.0053402 |
| CAMKK1     | 1.574602519 | 3.01E-11 | PNPLA8     | -0.593873716 | 1.36E-11  |
| MXI1       | 1.559532892 | 2.80E-06 | TSPAN14    | -0.594005337 | 2.67E-08  |
| ACSM3      | 1.556688446 | 0.000453 | SH3BP5-AS1 | -0.594179384 | 0.0088305 |
| VWCE       | 1.554310344 | 4.68E-06 | TAPBP      | -0.594900611 | 1.33E-13  |
| RNF125     | 1.546454531 | 3.23E-16 | MC1R       | -0.595049252 | 9.49E-08  |
| AC073896.1 | 1.53923272  | 7.24E-05 | IQSEC2     | -0.595210772 | 0.0001137 |
| TRNP1      | 1.499832437 | 5.31E-14 | MINDY1     | -0.595640108 | 1.54E-05  |
| PODXL2     | 1.49824917  | 1.19E-28 | LRRC37A16P | -0.595805179 | 0.0195539 |
| EEF1AKMT4  | 1.498208157 | 1.05E-30 | MEGF8      | -0.596273646 | 4.29E-11  |
| FAM89A     | 1.48336387  | 5.45E-11 | ATAD2      | -0.596552323 | 1.62E-08  |
| ADAT2      | 1.48281648  | 2.92E-34 | ANKRD50    | -0.596894916 | 4.28E-10  |
| GALNT18    | 1.451764515 | 6.00E-19 | DLGAP5     | -0.596969169 | 2.89E-05  |
| NPM3       | 1.449073199 | 5.11E-45 | KIAA1109   | -0.59729344  | 1.48E-06  |
| ADAMTS17   | 1.445313916 | 1.64E-06 | FRYL       | -0.597561402 | 6.53E-09  |
| FAM216A    | 1.440379133 | 4.81E-22 | ANK3       | -0.598570768 | 2.62E-09  |
| CMTM8      | 1.433236888 | 1.29E-12 | ANKMY2     | -0.598940285 | 0.0004811 |
| COQ8A      | 1.430760124 | 1.19E-23 | TCIRG1     | -0.59923007  | 6.92E-05  |
| RAB3IL1    | 1.427436541 | 3.60E-27 | CDK2       | -0.599700897 | 1.78E-06  |
| LRFN1      | 1.413375976 | 4.16E-08 | MMP16      | -0.59972659  | 0.0143787 |
| RRP9       | 1.404975368 | 1.59E-38 | CTTNBP2NL  | -0.599755941 | 7.90E-10  |
| GFOD1      | 1.398059447 | 2.53E-21 | IRF9       | -0.599887039 | 0.0077813 |
| PFKM       | 1.391478931 | 1.31E-22 | SEZ6L2     | -0.600074799 | 8.63E-16  |
| TAF4B      | 1.388361753 | 2.01E-14 | ATP9A      | -0.600132039 | 8.28E-10  |
| AP002387.2 | 1.38593386  | 5.89E-11 | BCAR3      | -0.600199348 | 2.61E-05  |
| GUCY1A1    | 1.384472475 | 8.23E-05 | TCAF1P1    | -0.600349729 | 0.0002596 |
| SCO2       | 1.376258614 | 1.39E-24 | PPARD      | -0.600400518 | 3.26E-07  |
| SNHG30     | 1.368243782 | 4.37E-20 | MAN2B2     | -0.600519856 | 1.06E-08  |
| RABEPK     | 1.367789337 | 2.61E-24 | TRIM16L    | -0.601369852 | 2.18E-06  |
| CCDC85B    | 1.362418165 | 3.46E-41 | STMN1      | -0.601390993 | 0.0247041 |
| PITX1      | 1.360694337 | 8.70E-43 | SEPTIN8    | -0.601678322 | 4.19E-13  |
| RPL23AP7   | 1.360079621 | 2.23E-07 | PKIA       | -0.601722225 | 0.0017552 |
| ARID5A     | 1.358173391 | 5.59E-15 | GNAI2      | -0.601731807 | 1.64E-08  |
| RGS16      | 1.34403611  | 7.04E-17 | DTL        | -0.602740392 | 1.21E-05  |
| FTL        | 1.34263755  | 1.84E-30 | AC073508.3 | -0.602875342 | 0.0128145 |
| SLC25A19   | 1.341983569 | 6.46E-28 | AC006372.2 | -0.603192185 | 0.0448173 |
| SLC29A1    | 1.337967449 | 3.20E-43 | ZCCHC24    | -0.603198731 | 0.0227024 |
| ANKRD13B   | 1.330896753 | 6.95E-24 | RNF19A     | -0.603554092 | 3.44E-11  |
| SLCO4A1    | 1.325203228 | 8.20E-20 | NPTXR      | -0.603577571 | 7.18E-06  |
| AP001505.1 | 1.319656909 | 0.000117 | KIAA0232   | -0.603870971 | 4.78E-12  |
| NANOS1     | 1.316193813 | 1.05E-11 | SLC37A1    | -0.60408708  | 2.97E-13  |
| METTL8     | 1.311854351 | 4.76E-25 | KIF15      | -0.604607165 | 0.000715  |
| RPIA       | 1.311267276 | 3.31E-28 | TPM4       | -0.605136905 | 1.96E-14  |
| GADD45A    | 1.306643902 | 3.26E-13 | TBC1D2     | -0.605138878 | 7.50E-08  |
| NTHL1      | 1.30511695  | 4.85E-23 | KITLG      | -0.605310787 | 0.0003848 |
| CTU1       | 1.299344114 | 5.97E-21 | PLEKHA6    | -0.605423086 | 1.26E-06  |
| TWNK       | 1.289199139 | 5.19E-23 | CEP162     | -0.605484082 | 0.0002419 |

|            |             |          |            |              |           |
|------------|-------------|----------|------------|--------------|-----------|
| NRARP      | 1.288543898 | 5.05E-24 | SLC6A8     | -0.606560699 | 0.001108  |
| PPIF       | 1.288487073 | 4.65E-31 | YBX2       | -0.606631099 | 0.0008482 |
| SH2D5      | 1.282740526 | 6.70E-11 | VSIG10     | -0.606703527 | 8.14E-11  |
| AC105052.2 | 1.282140629 | 0.000603 | EVPLL      | -0.607169064 | 0.0482804 |
| GALNT14    | 1.274237499 | 1.37E-16 | DEF6       | -0.6078563   | 0.0310042 |
| RNF145     | 1.262683985 | 5.66E-10 | CARD14     | -0.607942141 | 5.67E-06  |
| MNX1-AS1   | 1.259501477 | 1.15E-12 | RIMKLA     | -0.608541418 | 0.0391861 |
| CCDC86     | 1.258712146 | 2.81E-41 | PRIMPOL    | -0.608660842 | 0.0016256 |
| SMKR1      | 1.250419826 | 5.89E-17 | IQCC       | -0.608928427 | 0.009649  |
| NALT1      | 1.249513336 | 0.003448 | TNFAIP8    | -0.609446236 | 0.0002895 |
| AP006333.1 | 1.248889885 | 8.46E-08 | FOXO3      | -0.610075259 | 2.13E-12  |
| AC020763.4 | 1.24827274  | 0.000179 | LRRC23     | -0.610339005 | 0.0111596 |
| CIART      | 1.243784492 | 9.23E-19 | CCN1       | -0.610397986 | 1.15E-08  |
| CDKN1A     | 1.236199599 | 1.18E-22 | MOCS1      | -0.6106855   | 0.006916  |
| OAF        | 1.235822723 | 1.84E-16 | LYRM9      | -0.610762388 | 0.0135043 |
| LYAR       | 1.235507806 | 1.68E-27 | LINC00265  | -0.610905805 | 0.0033015 |
| DLEU1      | 1.231379986 | 1.23E-14 | NEBL       | -0.610987846 | 5.11E-15  |
| DPH2       | 1.227320672 | 5.15E-25 | UGDH       | -0.611745841 | 4.93E-10  |
| AL139353.1 | 1.226774652 | 0.000896 | WSB1       | -0.61198826  | 5.27E-14  |
| PCOTH      | 1.224880414 | 0.001134 | FADS3      | -0.612084703 | 1.77E-06  |
| OVGP1      | 1.222580923 | 0.001936 | USP46-AS1  | -0.612224911 | 0.0170569 |
| EPOP       | 1.216638451 | 2.51E-28 | S100A10    | -0.612244568 | 7.37E-13  |
| ASPHD1     | 1.214072397 | 6.72E-15 | CPS1       | -0.61312191  | 0.0002333 |
| ACTL8      | 1.209700497 | 0.000385 | PMM1       | -0.613152396 | 2.49E-05  |
| PRR5       | 1.201741186 | 6.61E-29 | NIT1       | -0.613670611 | 2.60E-06  |
| CARMIL2    | 1.201459024 | 6.93E-12 | FLNB       | -0.613701783 | 2.53E-21  |
| ZIC5       | 1.201353466 | 1.09E-11 | CARD10     | -0.614248099 | 0.0032164 |
| RPUSD1     | 1.200206481 | 7.62E-46 | IFT22      | -0.614416356 | 5.65E-13  |
| AMER1      | 1.198888568 | 3.09E-15 | SHANK2     | -0.614571773 | 8.48E-07  |
| CD320      | 1.197479994 | 1.62E-31 | LINC01515  | -0.61463009  | 0.0423735 |
| SH3GL3     | 1.197474866 | 0.004398 | ZFP36      | -0.615000937 | 2.85E-05  |
| YRDC       | 1.197119482 | 5.95E-23 | PDLIM1     | -0.615255713 | 3.54E-07  |
| ZNRF2P1    | 1.191061568 | 0.000104 | KIF1A      | -0.61528533  | 0.0144543 |
| AL118516.1 | 1.190590288 | 2.79E-10 | ZNF268     | -0.615374829 | 1.63E-07  |
| PNP        | 1.188060542 | 3.20E-22 | C1orf116   | -0.61558339  | 0.0376709 |
| MLKL       | 1.18676147  | 7.29E-16 | BACE1      | -0.616040816 | 5.00E-10  |
| KLHL21     | 1.182219901 | 1.50E-19 | RAB26      | -0.616751252 | 1.20E-05  |
| SLC25A32   | 1.182142934 | 4.82E-20 | MEIS3P1    | -0.616975741 | 0.043423  |
| ZNF296     | 1.181144874 | 4.08E-14 | AC002116.1 | -0.617261252 | 0.0476524 |
| CD3EAP     | 1.180917944 | 1.58E-33 | MAP3K6     | -0.617336252 | 1.84E-07  |
| NDUFAB2    | 1.180207288 | 2.07E-19 | RAB5B      | -0.617670749 | 1.96E-16  |
| PAQR5      | 1.179849092 | 0.004067 | CENPE      | -0.617825676 | 6.27E-06  |
| ARC        | 1.178032841 | 2.06E-06 | PAXIP1-AS2 | -0.618017994 | 0.0001318 |
| RPL23AP82  | 1.175992731 | 1.07E-16 | RECQL4     | -0.618322174 | 1.38E-06  |
| MON1A      | 1.175583208 | 6.19E-18 | ZNF680     | -0.619415794 | 0.0003551 |
| BTG2       | 1.174242283 | 0.005663 | SEC14L2    | -0.619986816 | 0.0011616 |
| FIRRE      | 1.173406796 | 1.61E-12 | SEC24D     | -0.620447915 | 1.40E-11  |

|            |             |          |            |              |           |
|------------|-------------|----------|------------|--------------|-----------|
| NDUFAF4    | 1.172147067 | 2.53E-33 | CAP2       | -0.621564388 | 1.68E-05  |
| NOP16      | 1.171949904 | 5.56E-34 | NCOA1      | -0.621884579 | 5.00E-09  |
| SPHK1      | 1.171664785 | 1.28E-22 | LINC01719  | -0.622169907 | 0.0163759 |
| FAM131C    | 1.162199262 | 3.11E-06 | TBC1D8B    | -0.622651575 | 6.92E-06  |
| TRMT61A    | 1.161214153 | 6.10E-34 | ANXA2      | -0.622995135 | 2.24E-14  |
| TFB2M      | 1.161077044 | 8.60E-23 | KCTD11     | -0.623001698 | 1.04E-06  |
| AC009831.1 | 1.157663445 | 8.16E-05 | GRIN2D     | -0.623278019 | 0.0390749 |
| MAP3K21    | 1.157415783 | 1.17E-11 | FZD2       | -0.623461382 | 3.50E-06  |
| MCRIP2     | 1.152807386 | 2.77E-31 | SESTD1     | -0.623536501 | 3.39E-09  |
| PER1       | 1.151213325 | 1.42E-10 | HIVEP1     | -0.623557746 | 0.0002435 |
| L3HYPDH    | 1.148106633 | 3.24E-13 | VMAC       | -0.624440758 | 0.0298819 |
| FAM162A    | 1.13869177  | 6.71E-19 | TAF9B      | -0.624555901 | 2.07E-09  |
| ELL3       | 1.1383217   | 1.48E-10 | CCDC50     | -0.625059804 | 4.47E-14  |
| RPP40      | 1.135767332 | 2.24E-24 | TMEM35B    | -0.625219452 | 0.0015663 |
| EXOSC4     | 1.135244238 | 4.11E-34 | ASAP3      | -0.625602596 | 3.98E-05  |
| NAT8L      | 1.133493975 | 2.18E-18 | GTSE1      | -0.626105795 | 1.18E-06  |
| AC048338.1 | 1.13335003  | 0.001351 | PLXNA3     | -0.626696078 | 5.89E-11  |
| PDXP       | 1.122382575 | 3.15E-17 | PDE5A      | -0.626866352 | 0.0008145 |
| BAG2       | 1.122121931 | 4.59E-07 | PTPN21     | -0.627599113 | 1.21E-05  |
| ID2        | 1.121294738 | 7.36E-13 | PREX1      | -0.627715016 | 1.64E-10  |
| C1QBP      | 1.119408913 | 7.79E-31 | MOSPD2     | -0.628331101 | 4.68E-06  |
| MRPL36     | 1.119236163 | 4.39E-38 | MXRA7      | -0.628529    | 0.0038965 |
| RPUSD4     | 1.116886435 | 2.18E-25 | ZNF606     | -0.628726049 | 0.0428702 |
| AL161772.1 | 1.115781925 | 5.03E-08 | EHHADH     | -0.629001051 | 0.000542  |
| AC027097.1 | 1.115016235 | 0.014134 | ERBB3      | -0.629801199 | 1.95E-16  |
| SLC19A3    | 1.11245269  | 0.001355 | ODF2L      | -0.630453466 | 0.0014305 |
| SFXN4      | 1.112364353 | 3.24E-21 | ATXN1      | -0.630799334 | 0.0001248 |
| EDA2R      | 1.112345466 | 5.39E-15 | PXDN       | -0.630818886 | 5.23E-11  |
| GRIN2C     | 1.11073004  | 2.26E-06 | CD82       | -0.630866262 | 0.0096753 |
| NFE2L3     | 1.102018942 | 1.56E-13 | PDP1       | -0.631640862 | 0.0001056 |
| EXOSC5     | 1.101974285 | 2.49E-38 | ZNF793     | -0.631829705 | 2.77E-05  |
| F12        | 1.101137214 | 1.37E-18 | MELTF      | -0.632048762 | 7.50E-06  |
| RAB3A      | 1.096977876 | 2.59E-08 | AC084018.2 | -0.632838222 | 0.0367127 |
| RRP1       | 1.094049833 | 1.24E-29 | FIG4       | -0.633559271 | 9.46E-09  |
| ATP6V1C2   | 1.093193368 | 1.80E-05 | UPK2       | -0.633826587 | 3.13E-06  |
| CDC42EP1   | 1.092881879 | 8.05E-27 | AC005332.6 | -0.63418726  | 1.18E-15  |
| TRAP1      | 1.092662863 | 3.83E-35 | GTF2IRD2   | -0.63432981  | 0.0030059 |
| JAG2       | 1.091354061 | 2.82E-14 | ACSF2      | -0.634471616 | 3.36E-06  |
| DEPTOR     | 1.090391269 | 4.14E-11 | SLC25A29   | -0.634593733 | 8.36E-09  |
| GRPEL1     | 1.088411894 | 1.06E-23 | RMI2       | -0.634665992 | 8.57E-05  |
| CRYM-AS1   | 1.084264196 | 0.003332 | SUOX       | -0.634667646 | 4.26E-06  |
| FXN        | 1.082937163 | 1.22E-14 | IGSF3      | -0.6347843   | 1.58E-21  |
| SLC9B2     | 1.08288479  | 8.91E-14 | EPG5       | -0.63516212  | 5.80E-07  |
| ANP32A     | 1.0814946   | 1.21E-18 | TENT5C     | -0.635660031 | 0.0401221 |
| LINC01703  | 1.081169536 | 0.01098  | AGRN       | -0.637519949 | 4.44E-18  |
| PAM16      | 1.076793154 | 9.44E-28 | SNX10      | -0.637820176 | 2.70E-05  |
| DIMT1      | 1.075245762 | 7.45E-22 | LINC00888  | -0.63794871  | 0.0016431 |

|             |             |          |            |              |           |
|-------------|-------------|----------|------------|--------------|-----------|
| CHCHD4      | 1.074634863 | 4.70E-19 | SRGAP2C    | -0.637984637 | 2.20E-08  |
| TMC5        | 1.072684543 | 6.60E-06 | VEZF1      | -0.638049261 | 2.41E-12  |
| RNASEH1-AS1 | 1.072402708 | 9.96E-15 | GLIPR2     | -0.638673397 | 0.0052211 |
| C15orf61    | 1.071264926 | 5.65E-13 | SLC46A3    | -0.638742459 | 6.59E-06  |
| MRPS30      | 1.070747694 | 4.47E-26 | SKIL       | -0.638821105 | 1.29E-15  |
| GEMIN5      | 1.070670613 | 8.59E-19 | CREBRF     | -0.639284286 | 0.000522  |
| C12orf73    | 1.067533142 | 7.00E-16 | LINC02591  | -0.639432545 | 0.0031182 |
| E2F5        | 1.06659861  | 1.85E-21 | PDZD4      | -0.639575919 | 0.0366444 |
| REXO4       | 1.063996905 | 3.02E-21 | KLF4       | -0.640761613 | 2.17E-06  |
| IMPDH1      | 1.063641501 | 7.02E-24 | GUSB       | -0.640980043 | 7.23E-12  |
| LYSMD2      | 1.060069201 | 1.33E-19 | HSD17B1    | -0.640997961 | 0.0005454 |
| PSMG1       | 1.059992331 | 2.02E-28 | ABTB1      | -0.64146377  | 3.29E-05  |
| PDCD2L      | 1.059401709 | 7.16E-15 | C5orf34    | -0.641504962 | 0.0138703 |
| UNC93B1     | 1.056623239 | 1.06E-18 | FOXJ2      | -0.641555004 | 5.00E-09  |
| SSC4D       | 1.056463496 | 0.017125 | EPHX2      | -0.642445187 | 0.0075576 |
| POLR1C      | 1.054196706 | 2.52E-25 | PARVA      | -0.642560143 | 6.66E-12  |
| BOP1        | 1.053321407 | 4.65E-27 | PRR15L     | -0.642761057 | 2.47E-09  |
| HMGA1       | 1.050691386 | 3.42E-28 | ZNF596     | -0.642848622 | 0.0094089 |
| ZNF239      | 1.047615316 | 3.00E-16 | AC005332.5 | -0.643169976 | 0.0052823 |
| MPP6        | 1.043414446 | 3.71E-10 | ZBTB10     | -0.643528794 | 1.37E-07  |
| NLN         | 1.041464672 | 1.45E-18 | KLHL5      | -0.643551605 | 6.54E-12  |
| FAM117B     | 1.037888252 | 2.13E-14 | MREG       | -0.64356262  | 0.0138472 |
| SNRPA1      | 1.036348345 | 4.52E-36 | KIFC1      | -0.643797438 | 3.17E-05  |
| PALD1       | 1.036081946 | 2.14E-05 | AC010186.2 | -0.644192532 | 0.0022786 |
| SMG1P2      | 1.035683918 | 2.99E-08 | POT1       | -0.644310133 | 3.36E-05  |
| C19orf73    | 1.03407095  | 0.028396 | DOP1B      | -0.644550108 | 2.32E-14  |
| CHCHD10     | 1.033002986 | 8.20E-20 | NUTM2B     | -0.645238906 | 0.0194109 |
| PFDN2       | 1.032216242 | 2.82E-26 | TEDC2      | -0.64595867  | 0.0011374 |
| THAP2       | 1.031603362 | 1.78E-05 | SFXN2      | -0.64598128  | 0.0002233 |
| ICAM5       | 1.031452019 | 4.68E-06 | RND1       | -0.646041114 | 2.35E-05  |
| SLC25A22    | 1.030189611 | 2.04E-19 | SPSB1      | -0.646217568 | 0.002824  |
| MARS2       | 1.029982767 | 2.86E-17 | ST3GAL3    | -0.646701817 | 0.0123661 |
| ADORA2B     | 1.029256129 | 1.51E-11 | GALNT10    | -0.646717252 | 3.40E-09  |
| CMSS1       | 1.029077278 | 7.79E-31 | CHRD       | -0.647074664 | 0.0005365 |
| NEIL2       | 1.028034805 | 2.95E-15 | HECTD2     | -0.647361785 | 0.0004764 |
| UCK2        | 1.027736343 | 1.73E-22 | PARP11     | -0.647586346 | 0.000709  |
| PUS1        | 1.027437    | 7.23E-27 | TMEM254    | -0.647590051 | 5.40E-07  |
| MRPS12      | 1.02740622  | 2.54E-32 | PHYH       | -0.647609483 | 2.60E-05  |
| CA11        | 1.026510966 | 5.85E-05 | POT1-AS1   | -0.647811129 | 0.0124848 |
| SIK1B       | 1.024763598 | 3.11E-09 | LINC01547  | -0.649946101 | 0.0006027 |
| LYRM4       | 1.023549889 | 5.18E-17 | BCL9       | -0.650109825 | 2.35E-11  |
| CNNM1       | 1.023283679 | 8.32E-09 | XRN1       | -0.650260423 | 7.99E-07  |
| EIF3CL      | 1.020543315 | 0.000414 | LDHD       | -0.650296549 | 0.002359  |
| AC009412.1  | 1.01852458  | 0.017049 | ZNF112     | -0.650784143 | 0.0443973 |
| DGUOK-AS1   | 1.01599712  | 0.000561 | ECHDC2     | -0.651106178 | 1.34E-07  |
| IL17D       | 1.015911917 | 1.20E-15 | ZNF888     | -0.651477935 | 0.0424153 |
| SCARNA2     | 1.013580231 | 0.029727 | MYH14      | -0.651891346 | 1.01E-15  |

|             |             |          |            |              |           |
|-------------|-------------|----------|------------|--------------|-----------|
| SOX12       | 1.011379082 | 8.19E-25 | SPC24      | -0.652035212 | 1.99E-05  |
| NKD2        | 1.011263994 | 1.69E-08 | WDR31      | -0.652770654 | 0.0159281 |
| FCRLB       | 1.008008645 | 0.001283 | RCAN1      | -0.653057035 | 3.82E-05  |
| YBX3        | 1.005366009 | 3.12E-25 | TPST1      | -0.653146206 | 0.0008712 |
| LINC01311   | 1.004997288 | 0.001698 | EPS8L1     | -0.653178879 | 5.97E-08  |
| TOP1MT      | 1.002521345 | 2.16E-22 | CALHM2     | -0.653418758 | 4.19E-05  |
| MRM3        | 1.002320882 | 3.11E-27 | FUT9       | -0.653501378 | 1.36E-07  |
| PRR19       | 1.001150887 | 5.45E-08 | CBX7       | -0.653576638 | 3.77E-07  |
| MRPS2       | 0.999140578 | 7.76E-30 | TOM1L2     | -0.653817913 | 1.06E-12  |
| RIOK1       | 0.996880274 | 2.46E-21 | LTBP2      | -0.654035943 | 0.0051278 |
| KCTD12      | 0.99426701  | 1.51E-07 | AL049834.1 | -0.654209226 | 0.0016314 |
| SRPX        | 0.992311888 | 0.00018  | KRT7       | -0.654226414 | 4.14E-11  |
| MBLAC2      | 0.991719327 | 2.27E-13 | TSPAN31    | -0.654300035 | 8.36E-11  |
| YDJC        | 0.990837099 | 2.46E-25 | MGAT4A     | -0.654408549 | 2.60E-11  |
| SUPV3L1     | 0.990000534 | 8.12E-16 | DNAJC22    | -0.654645256 | 2.19E-05  |
| TRMT11      | 0.989007742 | 3.33E-11 | FZD7       | -0.654863851 | 0.0068826 |
| SLC25A33    | 0.987814113 | 9.42E-25 | EVI5L      | -0.65487506  | 4.58E-12  |
| COA6        | 0.98693319  | 4.49E-14 | NOD1       | -0.654891574 | 0.0209297 |
| PPAN        | 0.986353729 | 1.16E-27 | CDKN2D     | -0.655673348 | 0.0057461 |
| SLC19A1     | 0.984970721 | 8.94E-29 | CDYL2      | -0.655725183 | 1.51E-09  |
| DDX10       | 0.977356332 | 1.10E-21 | AC022107.1 | -0.655769168 | 0.000106  |
| ARMC6       | 0.976485995 | 1.54E-25 | VAV3       | -0.655840813 | 4.00E-06  |
| GRB14       | 0.975544354 | 6.79E-12 | LY6G5C     | -0.65586162  | 0.0477048 |
| POLR3K      | 0.974456674 | 1.34E-31 | RBL1       | -0.656006825 | 2.65E-07  |
| NDUFAF8     | 0.973799368 | 1.57E-23 | IFI35      | -0.656182938 | 0.0024704 |
| H2AW        | 0.972811911 | 4.53E-12 | ZFHX3      | -0.656348438 | 6.10E-10  |
| EIF2B3      | 0.971961747 | 4.71E-19 | JAK2       | -0.656401237 | 0.000469  |
| ZC2HC1C     | 0.971781284 | 0.019093 | FAM214B    | -0.656718589 | 0.0010487 |
| ZIC2        | 0.967683704 | 2.45E-11 | EML5       | -0.656729041 | 0.0050488 |
| FAM81A      | 0.963731151 | 1.39E-09 | CEP97      | -0.656910354 | 6.17E-06  |
| SNHG4       | 0.962115582 | 3.42E-12 | ZNF467     | -0.656915957 | 4.86E-07  |
| TRMT1       | 0.961286248 | 2.87E-30 | TSPAN15    | -0.657144777 | 4.79E-12  |
| KRTCAP3     | 0.959314519 | 2.94E-10 | RNF38      | -0.657403849 | 2.06E-06  |
| DOHH        | 0.958258763 | 6.77E-17 | TTC30B     | -0.658129768 | 2.74E-05  |
| C20orf27    | 0.958110888 | 5.75E-42 | COL9A2     | -0.658190103 | 0.0019692 |
| CEBPD       | 0.957678559 | 2.10E-09 | IKZF4      | -0.658998528 | 5.24E-05  |
| PPAN-P2RY11 | 0.956901985 | 8.96E-06 | DBN1       | -0.659414475 | 1.50E-08  |
| NHP2        | 0.95563234  | 1.40E-30 | KIF20A     | -0.65982978  | 1.46E-05  |
| JPH1        | 0.95482623  | 3.63E-13 | MBNL2      | -0.65989914  | 7.83E-11  |
| DNAJC2      | 0.951208629 | 4.27E-22 | PRR11      | -0.660074491 | 9.20E-07  |
| SNHG10      | 0.947690422 | 1.74E-18 | TIMP3      | -0.660488829 | 0.0026778 |
| UQCRFS1P1   | 0.947672647 | 0.000286 | SYDE1      | -0.660633291 | 1.36E-07  |
| EXOSC7      | 0.946887118 | 2.09E-15 | SIPA1      | -0.661502057 | 0.0004533 |
| LRFN4       | 0.945851058 | 7.54E-32 | DRC3       | -0.662184852 | 0.0412368 |
| PHB         | 0.945820863 | 7.45E-36 | DSN1       | -0.662313459 | 1.02E-07  |
| AEN         | 0.944215725 | 9.05E-30 | CREB3L2    | -0.662718927 | 7.14E-12  |
| CCNG1       | 0.941860773 | 2.45E-12 | DNMBP      | -0.66340967  | 0.0001289 |



|           |             |          |            |              |           |
|-----------|-------------|----------|------------|--------------|-----------|
| DMAC1     | 0.93926169  | 3.30E-19 | TFAP2C     | -0.663746728 | 7.77E-11  |
| ALKBH2    | 0.937849222 | 8.44E-21 | MYH9       | -0.664237532 | 2.66E-12  |
| PRMT1     | 0.937045843 | 2.53E-33 | SMTN       | -0.664582846 | 3.60E-08  |
| IMP4      | 0.936478948 | 7.10E-36 | PARD6A     | -0.664854924 | 0.0006834 |
| FAM174C   | 0.935808276 | 3.30E-24 | GPRASP2    | -0.664995226 | 0.0004103 |
| PPM1J     | 0.935564315 | 2.63E-05 | RGPD8      | -0.665028999 | 0.0001009 |
| DNAAF2    | 0.935359568 | 7.33E-27 | PPM1E      | -0.665705972 | 0.0098766 |
| FKBP11    | 0.934778598 | 2.30E-18 | HFE        | -0.665910479 | 0.000231  |
| HSPA4L    | 0.933382475 | 1.51E-16 | POF1B      | -0.666697276 | 0.0003621 |
| UFSP1     | 0.93284268  | 7.16E-09 | ARMCX3     | -0.66711018  | 1.79E-08  |
| ZNF593    | 0.932667683 | 1.57E-16 | ZDHHC12    | -0.667254485 | 1.63E-07  |
| RITA1     | 0.930957306 | 1.29E-38 | ZNF493     | -0.667737326 | 0.0307379 |
| MYBBP1A   | 0.93050646  | 2.69E-19 | ZWINT      | -0.668196288 | 2.01E-08  |
| LDLRAD3   | 0.929319167 | 5.90E-11 | AC027601.6 | -0.668272089 | 0.004797  |
| MCAT      | 0.929262089 | 2.12E-17 | PBXIP1     | -0.668351025 | 1.14E-09  |
| FASTKD1   | 0.928063238 | 6.44E-14 | TUFT1      | -0.668411076 | 1.26E-09  |
| ID1       | 0.927832292 | 2.14E-12 | AGR2       | -0.668499268 | 1.54E-06  |
| ZNRF2P2   | 0.927360126 | 0.043429 | MDK        | -0.668952206 | 4.08E-09  |
| SLC2A4    | 0.927193653 | 0.024271 | FCHSD1     | -0.669428172 | 5.97E-06  |
| GLS       | 0.926802601 | 1.93E-15 | ZNF75D     | -0.669525999 | 1.33E-10  |
| THAP4     | 0.924575111 | 2.53E-21 | SKA2       | -0.670856803 | 1.95E-12  |
| SMAD6     | 0.924549753 | 2.82E-05 | S100A14    | -0.670889157 | 0.0206586 |
| SLC6A6    | 0.924506104 | 0.030232 | LMNTD2-AS1 | -0.671671878 | 0.0159674 |
| PPT2      | 0.923625104 | 3.01E-13 | NCOA2      | -0.671856747 | 7.85E-15  |
| RRP12     | 0.923557041 | 1.55E-23 | ZNF737     | -0.672017386 | 0.0027173 |
| PNO1      | 0.923525122 | 6.24E-22 | SP2-AS1    | -0.672628246 | 0.0158767 |
| RRP1B     | 0.923200112 | 3.02E-16 | RPL23AP87  | -0.673749652 | 0.0327608 |
| ECSIT     | 0.923187269 | 4.22E-17 | BMF        | -0.674019968 | 9.39E-05  |
| NXPH4     | 0.922963307 | 3.12E-10 | ZNF555     | -0.675101457 | 0.0082951 |
| ODC1      | 0.922687609 | 7.06E-23 | TSPAN1     | -0.675187941 | 1.95E-05  |
| FAM189A1  | 0.922107987 | 0.049182 | SNX21      | -0.676242443 | 2.59E-12  |
| ABCC4     | 0.919765591 | 1.71E-08 | ANO6       | -0.677309337 | 1.71E-05  |
| CFAP157   | 0.919729037 | 0.00026  | HOTAIR     | -0.677541618 | 0.0337161 |
| RINL      | 0.919573167 | 0.001637 | MLPH       | -0.677572034 | 4.01E-18  |
| TYW3      | 0.918676082 | 3.14E-13 | ZNF100     | -0.677595365 | 1.65E-05  |
| ANKRD16   | 0.91859061  | 3.11E-08 | RAB30      | -0.677915909 | 0.0001197 |
| STOM      | 0.917884293 | 4.18E-12 | TPM1       | -0.67799199  | 4.03E-12  |
| EIF4EBP1  | 0.917880237 | 6.58E-17 | SEMA4F     | -0.67863886  | 0.0001309 |
| MCF2L-AS1 | 0.917574473 | 0.012199 | CEP295     | -0.67955695  | 1.82E-08  |
| REXO2     | 0.916886014 | 6.21E-18 | SSH3       | -0.679609205 | 2.61E-21  |
| KIF9      | 0.915869716 | 2.19E-07 | SARM1      | -0.680016775 | 0.0437175 |
| DUSP23    | 0.915322938 | 1.96E-25 | MB         | -0.681013224 | 0.0039365 |
| KBTBD6    | 0.914895413 | 1.91E-11 | SPTSSB     | -0.682054729 | 2.75E-28  |
| ADRA2C    | 0.913517263 | 1.11E-09 | PHC1P1     | -0.682288927 | 0.0196312 |
| MRPS17    | 0.91239572  | 2.48E-16 | SLC16A6    | -0.682302765 | 3.80E-05  |
| NCS1      | 0.912135041 | 6.94E-23 | SPRY4      | -0.682333402 | 0.0002294 |
| TFAP4     | 0.911800615 | 1.27E-18 | KCNN4      | -0.683272482 | 0.0002426 |

|            |             |          |            |              |           |
|------------|-------------|----------|------------|--------------|-----------|
| POLR1B     | 0.911514851 | 9.50E-20 | DNAH100S   | -0.68345235  | 0.0016858 |
| WDR3       | 0.911327995 | 1.69E-21 | DHTKD1     | -0.683536246 | 9.21E-09  |
| RNF19B     | 0.911274268 | 2.92E-09 | RESF1      | -0.683973713 | 3.71E-05  |
| TNFRSF10A  | 0.910833724 | 2.16E-11 | TDRD7      | -0.684691506 | 7.81E-12  |
| AC012676.1 | 0.90965812  | 0.006078 | CASP8AP2   | -0.68485337  | 5.90E-11  |
| BTN3A2     | 0.909656724 | 0.017155 | LRP1       | -0.68518988  | 0.0003407 |
| CALML4     | 0.908795644 | 0.001462 | TTC28      | -0.685299448 | 0.0005099 |
| PRELID3A   | 0.908207731 | 1.98E-07 | ARHGEF38   | -0.685423849 | 0.0132824 |
| DHX37      | 0.907074523 | 1.26E-22 | TM7SF2     | -0.685437473 | 2.20E-11  |
| CNKS3R3    | 0.905669326 | 6.83E-06 | ASF1B      | -0.685999839 | 8.39E-06  |
| NAGPA      | 0.902987661 | 4.22E-17 | KIAA0319   | -0.686454959 | 0.0381623 |
| RPARP-AS1  | 0.902884917 | 2.19E-11 | DZANK1     | -0.686715819 | 0.0009751 |
| CC2D2A     | 0.901778952 | 2.21E-10 | PIGZ       | -0.68686395  | 0.0086591 |
| STC2       | 0.901315673 | 4.53E-25 | AC004233.2 | -0.686921292 | 5.11E-07  |
| CBR1       | 0.90020381  | 2.76E-27 | ALDH3B2    | -0.687078201 | 4.21E-08  |
| HDHD5      | 0.89916121  | 2.75E-20 | ENPEP      | -0.687221336 | 0.0205528 |
| C15orf39   | 0.898269819 | 6.31E-12 | STIM1      | -0.68807972  | 2.56E-09  |
| AL024508.1 | 0.897548105 | 9.95E-09 | FLVCR2     | -0.688158202 | 1.76E-13  |
| PES1       | 0.897216632 | 7.97E-22 | ERAP1      | -0.689168329 | 1.31E-08  |
| UBIAD1     | 0.896425904 | 3.81E-14 | ZNF287     | -0.689569116 | 0.0004638 |
| SLC25A37   | 0.89600657  | 1.28E-16 | IKBKGP1    | -0.689576704 | 0.0404986 |
| TIMM44     | 0.894806454 | 4.33E-20 | GALNT4     | -0.689900328 | 0.0007674 |
| RPS27L     | 0.893258611 | 8.45E-19 | AC068587.4 | -0.69007514  | 0.025978  |
| SLC27A4    | 0.892297046 | 3.66E-29 | PLAUR      | -0.690632686 | 0.0388236 |
| BLMH       | 0.889271076 | 1.05E-21 | MT1X       | -0.691584859 | 0.0043729 |
| MRPS26     | 0.889093032 | 4.56E-23 | MOV10      | -0.691957604 | 1.42E-17  |
| CYCS       | 0.888931037 | 2.24E-31 | SMIM5      | -0.692110923 | 9.56E-08  |
| GNB1L      | 0.888778685 | 1.91E-12 | CUL9       | -0.69214821  | 1.13E-13  |
| CTU2       | 0.888480672 | 3.85E-16 | FLT4       | -0.69242029  | 0.0178075 |
| PUS7       | 0.887938611 | 2.62E-15 | HS6ST3     | -0.692524014 | 0.000138  |
| SPESP1     | 0.887138841 | 1.66E-05 | KIAA1211L  | -0.693045045 | 2.42E-10  |
| MRM1       | 0.886137329 | 4.96E-10 | MAST4      | -0.693069667 | 1.07E-09  |
| NFKBIB     | 0.885440558 | 1.73E-22 | PTPRE      | -0.693425219 | 9.36E-07  |
| AKAP1      | 0.885407814 | 2.15E-16 | FADS2      | -0.693614143 | 1.42E-05  |
| SIRT4      | 0.883824489 | 0.000648 | RNASEL     | -0.693883979 | 7.31E-07  |
| NME1       | 0.882410515 | 6.92E-25 | HLA-F      | -0.693995834 | 0.0023212 |
| HSPE1      | 0.882372246 | 1.27E-20 | PCDHB9     | -0.694342264 | 0.0424819 |
| WDR74      | 0.881375902 | 7.05E-24 | ICA1L      | -0.694712231 | 0.005432  |
| NAF1       | 0.880854854 | 9.18E-18 | STX5       | -0.694723273 | 5.54E-14  |
| ACSS1      | 0.88023726  | 0.00089  | TCTN2      | -0.694779205 | 5.12E-06  |
| AC012146.1 | 0.879537426 | 0.006983 | JUN        | -0.694805815 | 1.83E-05  |
| USP31      | 0.879467933 | 1.26E-16 | CYSRT1     | -0.695096916 | 1.82E-08  |
| ESRRA      | 0.878702662 | 7.50E-22 | HPSE       | -0.695149652 | 0.0075869 |
| LBHD1      | 0.878480818 | 2.88E-07 | MFGE8      | -0.695320193 | 0.0003584 |
| ENTR1      | 0.878103015 | 3.58E-34 | CEP126     | -0.695628865 | 0.0144971 |
| CHAC1      | 0.877382097 | 2.18E-10 | C22orf46   | -0.695676134 | 2.02E-13  |
| PDSS1      | 0.876236903 | 1.51E-11 | IL4R       | -0.695703793 | 2.25E-09  |

|            |             |          |            |              |           |
|------------|-------------|----------|------------|--------------|-----------|
| ADCY3      | 0.875871486 | 4.56E-23 | BNIP3L     | -0.695987268 | 2.64E-10  |
| MRPL4      | 0.875429029 | 2.03E-29 | TTC3P1     | -0.696174768 | 8.69E-06  |
| ALDH1B1    | 0.875031206 | 1.91E-17 | LARP6      | -0.696456508 | 0.0053991 |
| SLC45A3    | 0.874959782 | 1.04E-08 | SLX1B      | -0.696772378 | 5.66E-09  |
| SINHCAF    | 0.874820636 | 9.01E-12 | FAM102B    | -0.697066656 | 5.39E-11  |
| RPL23AP42  | 0.874333731 | 0.030097 | MNS1       | -0.697412782 | 0.0030834 |
| ACTL10     | 0.874181298 | 1.83E-07 | TMEM45B    | -0.697520764 | 0.000567  |
| PSAT1      | 0.874171782 | 2.59E-28 | BAZ2B      | -0.697666252 | 7.53E-09  |
| SLIRP      | 0.873324794 | 3.01E-13 | SPC25      | -0.697748532 | 0.000148  |
| BCL11B     | 0.873048029 | 1.98E-07 | GAB1       | -0.697949519 | 2.14E-17  |
| ASB13      | 0.872145486 | 3.37E-17 | LMCD1      | -0.698258742 | 9.63E-07  |
| ACAT1      | 0.87129018  | 3.46E-13 | STAT2      | -0.698370415 | 4.84E-13  |
| MRPS6      | 0.870554769 | 4.64E-19 | CRYL1      | -0.699131349 | 3.51E-06  |
| FAM189B    | 0.869577005 | 5.58E-16 | H3C6       | -0.699310141 | 0.0011855 |
| NCBP2AS2   | 0.868886591 | 6.93E-27 | LINC01572  | -0.700221027 | 0.0095345 |
| SNHG21     | 0.867960915 | 0.001005 | TSPAN9     | -0.701521699 | 9.16E-08  |
| CISD3      | 0.867627119 | 5.88E-18 | SNX29      | -0.702081004 | 6.56E-11  |
| COTL1      | 0.866805437 | 3.91E-24 | UBL3       | -0.702259191 | 3.24E-25  |
| MET        | 0.866474836 | 7.74E-09 | RAB9B      | -0.702642078 | 0.006617  |
| RUVBL1     | 0.865559513 | 9.21E-25 | SUCO       | -0.702847076 | 2.37E-09  |
| GNPDA1     | 0.864740411 | 8.34E-19 | KIFAP3     | -0.703206684 | 0.0001519 |
| PIM2       | 0.86470734  | 1.50E-11 | ARMT1      | -0.703414782 | 0.0369137 |
| S100A4     | 0.863935789 | 0.001399 | FMO5       | -0.703558836 | 0.0134373 |
| TOMM5      | 0.863261781 | 8.43E-22 | GUCY1B1    | -0.703602366 | 0.0002771 |
| FBL        | 0.863158672 | 4.61E-13 | TK1        | -0.703752365 | 3.06E-07  |
| EEF1E1     | 0.86287856  | 4.17E-18 | DIAPH3     | -0.703790986 | 2.26E-05  |
| TIMM13     | 0.862499154 | 1.50E-19 | DMTN       | -0.704037082 | 2.25E-09  |
| KATNB1     | 0.862325997 | 7.71E-20 | AL365181.3 | -0.704056061 | 7.16E-05  |
| DOC2A      | 0.861837551 | 6.27E-13 | CLHC1      | -0.704864703 | 0.0230009 |
| AC109322.1 | 0.861446492 | 1.20E-05 | GRB7       | -0.705073491 | 8.12E-07  |
| UBR5-AS1   | 0.860248957 | 0.007516 | NAP1L2     | -0.705195842 | 0.0031628 |
| DUS3L      | 0.860015588 | 8.76E-20 | FNBP1L     | -0.706053465 | 3.83E-14  |
| MRPL50     | 0.859332906 | 2.95E-15 | SNED1      | -0.706564281 | 0.0131906 |
| AL445423.3 | 0.858805499 | 0.004876 | RAPGEF2    | -0.706868176 | 0.0080514 |
| DCUN1D5    | 0.858600716 | 4.60E-14 | AC004816.1 | -0.707237246 | 2.79E-05  |
| BOLA2B     | 0.858086851 | 2.60E-18 | SMARCD3    | -0.707695536 | 1.90E-08  |
| AL645608.2 | 0.857882888 | 0.045464 | ETV5       | -0.708483008 | 7.39E-08  |
| VPS9D1-AS1 | 0.857762685 | 8.87E-15 | PHF1       | -0.708783636 | 7.85E-11  |
| STK32C     | 0.856067627 | 9.40E-13 | FBXO41     | -0.709319774 | 0.0012826 |
| EBPL       | 0.856045001 | 3.09E-15 | PARP14     | -0.709484985 | 1.27E-16  |
| CHCHD6     | 0.855682376 | 4.32E-13 | TRIM38     | -0.710125723 | 2.24E-07  |
| IFI30      | 0.855373186 | 5.59E-28 | LIN52      | -0.710138415 | 3.36E-07  |
| SHANK3     | 0.854883883 | 1.59E-05 | ANKRD44    | -0.710154617 | 3.88E-05  |
| MRT04      | 0.853684982 | 8.02E-25 | QPCT       | -0.710522941 | 0.0069826 |
| YARS2      | 0.8524674   | 4.69E-16 | TCEAL3     | -0.711145448 | 1.96E-08  |
| ZNRD2      | 0.852315435 | 8.52E-20 | BTN2A2     | -0.711262726 | 0.000198  |
| RIOX2      | 0.851846713 | 4.35E-17 | GOLGA7B    | -0.711818042 | 0.0007818 |

|              |             |          |            |              |           |
|--------------|-------------|----------|------------|--------------|-----------|
| WDR77        | 0.850068463 | 2.29E-29 | DOCK8-AS1  | -0.712190923 | 0.0068957 |
| CUTC         | 0.848665396 | 4.77E-14 | PCDHA11    | -0.712310118 | 1.20E-09  |
| SAPCD2       | 0.84834677  | 4.68E-26 | HTR7P1     | -0.712987651 | 0.0010706 |
| MPP3         | 0.848277658 | 0.000174 | GPR39      | -0.713839001 | 0.0327191 |
| DCAF4        | 0.847639484 | 2.42E-12 | AR         | -0.714020771 | 0.0003581 |
| KLHL18       | 0.84731955  | 1.25E-13 | SFR1       | -0.714370058 | 0.0057499 |
| FP565260.3   | 0.847304558 | 0.000286 | ADCY5      | -0.714868568 | 1.07E-08  |
| TRIAP1       | 0.847275286 | 2.42E-15 | ZCWPW1     | -0.714983574 | 5.85E-05  |
| DANCR        | 0.847020973 | 1.19E-25 | NHLRC3     | -0.715643347 | 5.30E-07  |
| NOC3L        | 0.84697543  | 1.31E-19 | SOX4       | -0.715743562 | 2.56E-07  |
| GPR135       | 0.846015789 | 0.001403 | TSHZ3      | -0.715817844 | 0.0119046 |
| TMEM33       | 0.844959336 | 8.14E-16 | COL27A1    | -0.716047937 | 0.0003542 |
| WDR4         | 0.844583933 | 5.11E-15 | ENPP1      | -0.716443536 | 6.49E-13  |
| NOP56        | 0.84433671  | 1.03E-35 | SLC30A3    | -0.716641548 | 0.0014919 |
| MAST1        | 0.843960805 | 0.001134 | SDC4       | -0.717247921 | 1.56E-17  |
| PSMG4        | 0.843597013 | 1.26E-16 | PARP10     | -0.717398676 | 3.57E-11  |
| PEX5         | 0.842841036 | 2.75E-15 | TMEM164    | -0.717664798 | 0.0370166 |
| GARNL3       | 0.842789441 | 0.006639 | IRF5       | -0.718065972 | 1.32E-06  |
| CCDC58       | 0.842514102 | 6.75E-12 | AC008393.1 | -0.719590454 | 0.0412377 |
| FMNL2        | 0.840894934 | 2.92E-08 | ANLN       | -0.719896049 | 3.09E-10  |
| BBC3         | 0.840670585 | 3.37E-08 | GM2A       | -0.720286779 | 4.12E-06  |
| DNAH14       | 0.840560554 | 2.53E-06 | CRABP2     | -0.72080155  | 9.21E-08  |
| C1orf109     | 0.837826877 | 2.24E-15 | EFNB3      | -0.721116098 | 0.0004949 |
| GALK1        | 0.835043504 | 5.47E-28 | SPAG4      | -0.721360237 | 0.0008072 |
| GLRX3        | 0.834388736 | 1.85E-20 | PBX1       | -0.72169864  | 1.20E-23  |
| CDC42EP2     | 0.833828167 | 0.008239 | AC108488.3 | -0.72218     | 0.0048963 |
| ATP6V0E2-AS1 | 0.833741535 | 9.25E-05 | ERMAP      | -0.722358493 | 3.73E-06  |
| TIMM17A      | 0.83321889  | 1.22E-20 | GMPR       | -0.722771924 | 0.0215194 |
| AC018645.3   | 0.833131685 | 0.033962 | HIPK2      | -0.723064168 | 4.13E-12  |
| WDR43        | 0.833085867 | 2.07E-18 | STIL       | -0.723252578 | 2.55E-09  |
| SH2B2        | 0.833073944 | 1.84E-08 | PDGFRL     | -0.72378802  | 3.09E-05  |
| PLK3         | 0.832045831 | 8.33E-08 | MGLL       | -0.725332494 | 6.84E-05  |
| POLR3E       | 0.831720816 | 1.76E-12 | C3orf14    | -0.725770463 | 4.14E-08  |
| TXLNG        | 0.830296209 | 3.74E-12 | SLC44A3    | -0.725995101 | 0.0012912 |
| RBM19        | 0.830232165 | 1.02E-12 | FAM110C    | -0.726009026 | 9.61E-12  |
| CHN1         | 0.830225111 | 1.26E-16 | KREMEN1    | -0.727051851 | 8.81E-08  |
| NOLC1        | 0.830092154 | 8.82E-23 | ID2-AS1    | -0.727761124 | 0.0084823 |
| PINX1_2      | 0.829547018 | 9.18E-14 | RECK       | -0.728016064 | 0.0157965 |
| IFRD2        | 0.828556039 | 2.32E-29 | MIR210HG   | -0.728531191 | 0.0069005 |
| DDX21        | 0.827789718 | 7.27E-23 | NUSAP1     | -0.72872668  | 9.42E-11  |
| SRM          | 0.827716524 | 9.03E-32 | TES        | -0.729067842 | 1.65E-14  |
| TNFRSF10B    | 0.827348936 | 3.88E-14 | WDR76      | -0.729072794 | 5.33E-07  |
| TYMSOS       | 0.826677847 | 0.001519 | TLN2       | -0.729117454 | 6.25E-07  |
| SLC18B1      | 0.826381025 | 1.65E-10 | ALG10      | -0.729277284 | 6.14E-05  |
| WDR12        | 0.825827114 | 7.32E-15 | FAT1       | -0.729954026 | 2.65E-09  |
| ZNF598       | 0.825784068 | 5.64E-28 | MOSPD3     | -0.731393176 | 1.60E-08  |
| NLE1         | 0.825368958 | 4.10E-18 | MOB3C      | -0.732926019 | 4.51E-06  |

|              |             |          |           |              |           |
|--------------|-------------|----------|-----------|--------------|-----------|
| POP7         | 0.824712678 | 7.44E-23 | SOWAHC    | -0.732954453 | 4.08E-05  |
| SLC39A4      | 0.8238293   | 1.70E-12 | TMEM87B   | -0.733287029 | 1.02E-16  |
| SIM2         | 0.823336862 | 9.97E-06 | TMCO3     | -0.733429903 | 5.35E-10  |
| LINC01534    | 0.823219688 | 0.041505 | ZNF354C   | -0.734049058 | 0.0036936 |
| TYSND1       | 0.822984043 | 2.13E-23 | HECW2     | -0.734308375 | 0.0024963 |
| NOB1         | 0.82295823  | 4.23E-28 | INHBB     | -0.734418951 | 5.19E-14  |
| SLC16A10     | 0.821770945 | 0.022309 | EMP2      | -0.734688596 | 3.92E-13  |
| RSL24D1      | 0.821707352 | 1.98E-18 | BARD1     | -0.735037909 | 1.07E-06  |
| UBE3D        | 0.821303233 | 3.47E-06 | TRIM66    | -0.73524893  | 5.67E-06  |
| EIF5A        | 0.819959952 | 3.94E-30 | BCAS1     | -0.735706402 | 0.0064702 |
| CISD1        | 0.818848942 | 7.20E-11 | HLA-DRB1  | -0.735864622 | 1.77E-11  |
| INO80B       | 0.818691426 | 4.36E-16 | CDK19     | -0.73617647  | 1.86E-15  |
| ADSL         | 0.818634606 | 9.46E-23 | PHF19     | -0.736195806 | 6.04E-08  |
| BAX          | 0.817830972 | 1.32E-23 | PAQR4     | -0.736343394 | 2.90E-07  |
| WDR97        | 0.817652708 | 1.73E-11 | SLC12A6   | -0.737280396 | 9.51E-07  |
| RSAD1        | 0.814535165 | 4.81E-15 | ZNF862    | -0.737321534 | 1.25E-11  |
| SESN1        | 0.814430732 | 6.41E-11 | CCNG2     | -0.737531836 | 9.28E-10  |
| TPST2        | 0.814219825 | 6.30E-12 | LMO2      | -0.737939051 | 0.0124147 |
| FAM136A      | 0.81373465  | 4.55E-24 | HPS3      | -0.738534404 | 1.58E-18  |
| HSPD1        | 0.812966122 | 7.88E-25 | IL17RD    | -0.739352384 | 0.0476436 |
| FAM155B      | 0.812482857 | 2.90E-10 | FAM111A   | -0.739612536 | 6.56E-14  |
| IMP3         | 0.812253231 | 8.22E-21 | LETM2     | -0.739687229 | 0.0034328 |
| PWP1         | 0.810669724 | 9.44E-23 | CTAGE4    | -0.740165727 | 0.0001258 |
| IL15RA       | 0.809352802 | 2.38E-08 | NECTIN2   | -0.7413259   | 1.29E-18  |
| YBX1         | 0.80839745  | 8.14E-29 | CASP4     | -0.741480293 | 0.0011461 |
| CARD9        | 0.807304946 | 5.39E-05 | HOXC10    | -0.741499697 | 0.0013514 |
| SLC35F2      | 0.806878338 | 4.28E-15 | CELSR1    | -0.741595234 | 5.43E-16  |
| FBRSL1       | 0.806729586 | 5.47E-22 | CLSPN     | -0.741652657 | 3.51E-08  |
| CRACR2A      | 0.806689201 | 8.13E-07 | KIF18A    | -0.741828543 | 2.22E-08  |
| DCTPP1       | 0.80501384  | 1.01E-31 | CREB3L4   | -0.742234852 | 4.22E-06  |
| EPB41L4A-AS1 | 0.804349875 | 2.87E-13 | FAM234B   | -0.742968716 | 2.29E-07  |
| PRKAR1B      | 0.80415657  | 8.78E-22 | CENPU     | -0.743134636 | 4.98E-07  |
| MTRR         | 0.804040469 | 3.29E-11 | SRGAP2B   | -0.743670248 | 5.11E-08  |
| KRT8P12      | 0.803956194 | 0.012215 | NLGN2     | -0.743745474 | 8.59E-15  |
| TMEM63C      | 0.802819864 | 1.30E-06 | PLD2      | -0.744222259 | 2.33E-11  |
| THUMPD2      | 0.799708293 | 1.44E-09 | APLP1     | -0.744390772 | 0.0002787 |
| COQ3         | 0.799072591 | 1.28E-09 | ZNF821    | -0.744884417 | 3.90E-05  |
| PAK1IP1      | 0.799067891 | 6.50E-17 | KIF13B    | -0.745540863 | 2.91E-11  |
| TAMM41       | 0.798400553 | 6.23E-14 | FGD1      | -0.745796219 | 0.0493349 |
| COQ10A       | 0.797906824 | 1.21E-06 | C20orf204 | -0.745984652 | 0.0415269 |
| PM20D2       | 0.797266592 | 2.08E-11 | CLDN23    | -0.746237697 | 1.80E-05  |
| CTSC         | 0.796422973 | 1.74E-13 | NT5C2     | -0.746295186 | 1.55E-15  |
| LYRM7        | 0.796028343 | 2.84E-08 | HDAC5     | -0.747513125 | 6.67E-05  |
| PHLDA3       | 0.794546353 | 5.56E-13 | GPR158    | -0.747659415 | 0.0044806 |
| CYP2J2       | 0.793092589 | 0.030649 | TRIOBP    | -0.747796207 | 2.44E-17  |
| NIP7         | 0.792612422 | 1.53E-24 | CCDC191   | -0.747879725 | 0.0003583 |
| SERF1B       | 0.792461238 | 1.50E-15 | REXO5     | -0.749459717 | 9.61E-05  |

|            |             |          |            |              |           |
|------------|-------------|----------|------------|--------------|-----------|
| ADGRA3     | 0.791519864 | 9.46E-12 | VAMP5      | -0.749758755 | 0.0011767 |
| GCFC2      | 0.7913081   | 2.80E-08 | PRRT3      | -0.750557206 | 4.07E-12  |
| DVL1       | 0.790119102 | 2.69E-21 | PCDH9      | -0.751229508 | 0.0076491 |
| CLPP       | 0.790110545 | 1.44E-20 | JAK1       | -0.751497949 | 1.63E-16  |
| QSOX2      | 0.789900454 | 1.73E-16 | CROT       | -0.752156346 | 1.38E-08  |
| TDRD1      | 0.78977435  | 5.97E-12 | COL18A1    | -0.752212623 | 1.06E-13  |
| RASGEF1C   | 0.789475995 | 0.042634 | SCN1B      | -0.752613665 | 0.0040377 |
| LINC01106  | 0.789321286 | 2.55E-06 | MAP3K12    | -0.75327179  | 1.91E-09  |
| SNHG15     | 0.788860336 | 1.92E-08 | ZC2HC1A    | -0.754089878 | 4.49E-06  |
| GTPBP3     | 0.78881422  | 4.91E-15 | ATP2C2     | -0.754405905 | 9.62E-11  |
| ELOF1      | 0.787770565 | 3.24E-26 | THNSL2     | -0.75449044  | 1.77E-10  |
| ZMAT3      | 0.787151438 | 3.31E-09 | NR4A1      | -0.754665898 | 8.79E-09  |
| TBRG4      | 0.786986948 | 4.34E-19 | TMPRSS13   | -0.754876788 | 3.80E-08  |
| TTLL12     | 0.786675821 | 2.06E-20 | KRT87P     | -0.75503181  | 0.0044064 |
| SLC25A27   | 0.786032874 | 0.021499 | KANK2      | -0.75533781  | 6.58E-17  |
| SLC9A3     | 0.785372978 | 1.02E-05 | C21orf58   | -0.75536086  | 4.36E-05  |
| RSL1D1     | 0.785170974 | 1.38E-19 | LASP1      | -0.75549567  | 2.11E-24  |
| THAP11     | 0.785129722 | 3.25E-14 | CORO2A     | -0.755602735 | 9.52E-09  |
| PRRT1      | 0.784568012 | 0.039007 | MIEF2      | -0.756152702 | 5.11E-10  |
| ZNF778     | 0.783277939 | 9.49E-16 | AC023158.1 | -0.756427766 | 0.0001377 |
| HHEX       | 0.783259616 | 0.003149 | ERICD      | -0.756785536 | 0.000381  |
| AHSA1      | 0.782343057 | 1.26E-24 | TMEM107    | -0.756893294 | 0.0019751 |
| DIAPH2     | 0.78101633  | 1.58E-10 | SDCBP2     | -0.757269992 | 0.0136492 |
| C16orf91   | 0.780987738 | 2.76E-12 | GNAO1      | -0.757316596 | 0.0468716 |
| ASIC1      | 0.780062654 | 1.90E-06 | AC112220.2 | -0.757679899 | 6.95E-05  |
| PDP2       | 0.77978593  | 1.08E-07 | CCN2       | -0.757725781 | 0.0326104 |
| TUBE1      | 0.779477529 | 1.36E-06 | ENPP5      | -0.758018142 | 4.19E-05  |
| C5orf30    | 0.779080036 | 1.13E-10 | HLA-DQB1   | -0.758280576 | 1.26E-08  |
| AK2        | 0.778913463 | 1.97E-22 | RBMS2      | -0.759032541 | 3.23E-06  |
| MAPT       | 0.778613092 | 7.88E-08 | AC026748.3 | -0.759104269 | 0.0002551 |
| DFFB       | 0.777973642 | 5.46E-05 | FAM189A2   | -0.759256509 | 0.0008218 |
| NOTCH1     | 0.777742367 | 5.89E-15 | SEMA4A     | -0.759433083 | 1.10E-08  |
| ACOXL      | 0.776337769 | 0.012413 | CD24       | -0.759642507 | 1.87E-14  |
| MGST1      | 0.774724894 | 2.99E-12 | CCNE2      | -0.7602986   | 1.27E-07  |
| CDC123     | 0.77447893  | 1.09E-18 | PSMG3-AS1  | -0.760398434 | 5.74E-17  |
| TSR3       | 0.774358795 | 6.24E-25 | LOXL1-AS1  | -0.760811691 | 0.0006345 |
| GNAI1      | 0.773620137 | 0.001158 | CHROMR     | -0.760848209 | 0.0014533 |
| CGREF1     | 0.773251    | 1.99E-08 | CYP4V2     | -0.760934054 | 5.89E-06  |
| FOXN3-AS1  | 0.772463323 | 0.038468 | KDELR3     | -0.763056805 | 7.93E-06  |
| AK6        | 0.77213731  | 1.24E-12 | MAP4K2     | -0.763857607 | 2.72E-09  |
| PCSK6      | 0.771792749 | 4.08E-08 | IQGAP1     | -0.764131552 | 1.11E-21  |
| KLHL23     | 0.770924951 | 2.90E-06 | LRRC49     | -0.764295766 | 0.0475331 |
| TMCO6      | 0.770644778 | 7.86E-08 | ITPR2      | -0.764375545 | 7.12E-11  |
| AC083899.1 | 0.769273101 | 0.019817 | ASPM       | -0.764521464 | 9.51E-10  |
| TMEM161A   | 0.769082796 | 7.95E-14 | ZNF713     | -0.764534632 | 0.004842  |
| BOD1       | 0.768877763 | 1.65E-18 | NBEA       | -0.765134593 | 3.98E-08  |
| CLUH       | 0.768391889 | 2.52E-18 | TRPS1      | -0.765389307 | 4.09E-12  |

|            |             |          |             |              |           |
|------------|-------------|----------|-------------|--------------|-----------|
| AC107871.1 | 0.768134741 | 4.40E-06 | AP005329.2  | -0.765569288 | 0.0415066 |
| PNPT1      | 0.76686328  | 8.07E-16 | FAM102A     | -0.765705534 | 4.32E-11  |
| GTF2F2     | 0.76611385  | 1.92E-13 | CARF        | -0.766017683 | 0.0031248 |
| ASS1       | 0.76510058  | 9.42E-14 | RHOB        | -0.766426389 | 9.97E-18  |
| ZNF511     | 0.764628898 | 9.88E-12 | NINJ2-AS1   | -0.76688834  | 0.0043813 |
| NT5DC2     | 0.764486205 | 2.14E-21 | C14orf132   | -0.767394025 | 0.0082574 |
| TMEM177    | 0.764479315 | 7.78E-10 | FAM111B     | -0.768466008 | 9.47E-09  |
| MHENCN     | 0.764355828 | 0.00375  | PRX         | -0.768914933 | 0.0122767 |
| AC010655.4 | 0.764253077 | 0.018459 | TTC25       | -0.769458838 | 0.0242557 |
| IKZF5      | 0.763755865 | 1.07E-10 | L1CAM       | -0.769520827 | 0.0088719 |
| RAB29      | 0.76311675  | 3.24E-13 | EPHA1       | -0.769912188 | 7.17E-12  |
| DDX49      | 0.762122347 | 2.22E-25 | CAPG        | -0.770372787 | 7.75E-08  |
| LAPTM4B    | 0.761673086 | 3.99E-17 | KATNAL1     | -0.77098266  | 0.0001903 |
| C12orf29   | 0.761573012 | 5.11E-10 | LAMB2       | -0.770997441 | 1.31E-22  |
| C12orf45   | 0.761178433 | 1.38E-09 | GABARAPL1   | -0.77145285  | 0.0198167 |
| BCS1L      | 0.761104688 | 1.85E-21 | FAM43A      | -0.771676204 | 0.0008762 |
| PTRH2      | 0.76083793  | 3.63E-18 | CBLN3       | -0.771766574 | 0.0475816 |
| ISCU       | 0.760717529 | 5.57E-20 | CABLES2     | -0.771889695 | 1.93E-10  |
| HOMER1     | 0.760657525 | 8.89E-12 | IPP         | -0.771892641 | 1.68E-06  |
| ISOC2      | 0.760096229 | 3.00E-17 | N4BP2L1     | -0.77201325  | 0.0138647 |
| RUNDC3B    | 0.759599234 | 0.013262 | XBP1        | -0.774564949 | 0.0228105 |
| MRPL34     | 0.759379865 | 6.76E-16 | AC010186.3  | -0.775160544 | 0.0241445 |
| KAZN       | 0.759341681 | 4.60E-11 | C19orf33    | -0.77541193  | 4.05E-07  |
| CCDC78     | 0.75915151  | 1.43E-14 | SRCIN1      | -0.775940598 | 1.18E-08  |
| SLC25A15   | 0.758988202 | 1.54E-20 | SLC25A24    | -0.776041699 | 2.33E-13  |
| PRMT5      | 0.758239577 | 5.28E-22 | LTC4S       | -0.77642082  | 0.0385864 |
| SLC4A2     | 0.75758895  | 6.51E-19 | BRCA1       | -0.776919877 | 5.56E-10  |
| RHBDF2     | 0.757516437 | 7.42E-14 | CPQ         | -0.777277554 | 0.0152633 |
| FBXO25     | 0.75699782  | 6.62E-11 | KIAA1324    | -0.777347214 | 1.50E-08  |
| SMPD2      | 0.756957738 | 1.58E-12 | TEAD1       | -0.777708026 | 3.59E-14  |
| ADM5       | 0.756671085 | 6.58E-05 | AHNAK       | -0.778188284 | 1.53E-21  |
| FAH        | 0.756479323 | 2.85E-10 | RAB27B      | -0.778648659 | 7.69E-20  |
| COA4       | 0.756433162 | 8.55E-17 | LDLRAD4     | -0.779249225 | 8.95E-10  |
| NUFIP1     | 0.756410352 | 2.04E-08 | ZNF217      | -0.779979022 | 2.75E-21  |
| POLR2F     | 0.755265458 | 5.00E-17 | TMBIM1      | -0.780052636 | 0.0011396 |
| BEX2       | 0.754985207 | 0.017987 | GSTM4       | -0.780716826 | 0.0120055 |
| AC068547.1 | 0.754929807 | 4.10E-09 | RUNDC3A-AS1 | -0.781052158 | 2.99E-07  |
| TOMM40     | 0.754712437 | 2.40E-26 | PROS1       | -0.781242442 | 0.0268717 |
| MRPL14     | 0.754236635 | 1.75E-21 | RNF213      | -0.781428806 | 3.83E-14  |
| CHORDC1    | 0.75390445  | 9.00E-15 | SH3D21      | -0.781737789 | 7.32E-12  |
| DYRK3      | 0.753268975 | 3.31E-08 | PRKD1       | -0.781900799 | 0.0004016 |
| BEND3      | 0.752800998 | 5.73E-08 | SHISA2      | -0.782216336 | 0.043441  |
| PRDX4      | 0.752453289 | 1.92E-16 | PSMB9       | -0.782438165 | 0.0007648 |
| AK4        | 0.751542539 | 5.32E-09 | WWC3        | -0.782991986 | 6.26E-17  |
| PTDSS1     | 0.751467694 | 1.96E-14 | CLSTN3      | -0.783202584 | 6.41E-08  |
| TMC8       | 0.751091587 | 0.014274 | NUCB2       | -0.784452925 | 7.95E-07  |
| LINC01123  | 0.750812022 | 0.001152 | TLCD4       | -0.785082808 | 2.19E-07  |

|            |             |          |            |              |           |
|------------|-------------|----------|------------|--------------|-----------|
| MEST       | 0.750810485 | 3.38E-16 | MAGED4     | -0.788225026 | 0.0188605 |
| TIMM21     | 0.749560011 | 3.02E-12 | TMEM198    | -0.788443793 | 0.0048987 |
| TOMM34     | 0.748941323 | 2.40E-13 | DAGLA      | -0.788924048 | 8.31E-06  |
| PMPCA      | 0.748807721 | 2.18E-21 | FER        | -0.789017061 | 3.49E-08  |
| AC019069.1 | 0.748795978 | 4.64E-06 | PAQR8      | -0.789209285 | 0.0178075 |
| GEMIN4     | 0.748777854 | 3.25E-18 | EFCAB11    | -0.789685706 | 5.73E-08  |
| CCDC59     | 0.748685718 | 2.79E-15 | CLGN       | -0.791521576 | 0.0384677 |
| PPTC7      | 0.748438328 | 2.91E-09 | NDC80      | -0.791921763 | 1.70E-06  |
| SACS       | 0.748345357 | 9.17E-08 | KNL1       | -0.791977996 | 2.07E-08  |
| AIMP2      | 0.747920667 | 8.84E-18 | SLC24A1    | -0.792013955 | 1.66E-10  |
| IMMP2L     | 0.747521624 | 1.42E-06 | MAN1C1     | -0.792131721 | 0.0232267 |
| WNK2       | 0.747354634 | 1.17E-06 | SYNE2      | -0.792352295 | 3.56E-19  |
| LSM7       | 0.747318388 | 3.55E-19 | VIPR1      | -0.792361484 | 0.0001237 |
| PUM3       | 0.746722507 | 1.65E-18 | RAB4B      | -0.792498789 | 8.46E-06  |
| MRPS23     | 0.746513516 | 1.61E-20 | EFCAB6     | -0.792984693 | 0.0156376 |
| BRIX1      | 0.746140487 | 1.17E-18 | CNTRL      | -0.793666053 | 1.40E-05  |
| CAMKMT     | 0.745468838 | 4.49E-05 | AKAP5      | -0.793866108 | 0.012323  |
| MAX        | 0.744619848 | 2.70E-19 | PHLDA1     | -0.793877975 | 1.79E-08  |
| BMP7       | 0.7443619   | 2.46E-13 | MAGED1     | -0.794185778 | 4.41E-17  |
| RRS1       | 0.74409349  | 3.29E-17 | KLC3       | -0.794299736 | 0.0011933 |
| METTL26    | 0.742820023 | 1.14E-17 | DOCK8      | -0.794580787 | 3.24E-08  |
| NCLN       | 0.742403124 | 3.88E-23 | EPB41L1    | -0.79494848  | 2.57E-10  |
| TRABD      | 0.74172081  | 3.22E-20 | BMP8B      | -0.795049554 | 2.71E-05  |
| MRPS5      | 0.741670412 | 1.32E-11 | TCF19      | -0.795149007 | 1.09E-09  |
| RNF126     | 0.740761389 | 1.42E-18 | BHLHE41    | -0.795436174 | 0.0223846 |
| PRR7       | 0.740598107 | 1.30E-11 | ZNF311     | -0.796036153 | 0.0333859 |
| AC125807.2 | 0.73992316  | 5.94E-06 | KRT81      | -0.796091696 | 1.14E-31  |
| SLC39A14   | 0.739608062 | 1.23E-16 | MAGED2     | -0.796273935 | 4.31E-14  |
| CTPS1      | 0.738903653 | 2.17E-26 | AL358852.1 | -0.796602594 | 0.0486052 |
| PACC1      | 0.738782446 | 9.66E-07 | EDN1       | -0.797023591 | 0.0015215 |
| RPS19BP1   | 0.738629418 | 1.44E-21 | NFKBIZ     | -0.797130813 | 7.07E-19  |
| TMEM102    | 0.738434235 | 3.19E-08 | MCOLN3     | -0.798278983 | 0.0043714 |
| POLR1E     | 0.737788614 | 3.60E-11 | FRMD4B     | -0.798312248 | 1.66E-05  |
| AC021087.5 | 0.736951076 | 0.008232 | EPB41L2    | -0.798622908 | 5.25E-09  |
| APTR       | 0.736230702 | 6.06E-07 | CAPN9      | -0.799390325 | 0.0028667 |
| UBALD1     | 0.735034141 | 2.24E-15 | ULK1       | -0.799546027 | 3.40E-20  |
| ZDHHC9     | 0.734901547 | 1.43E-13 | TFPI       | -0.799980709 | 2.19E-16  |
| TXNL4A     | 0.734628698 | 1.44E-18 | H6PD       | -0.8001881   | 1.87E-10  |
| TRIM65     | 0.734506699 | 6.24E-23 | CDKN2C     | -0.800212919 | 2.03E-05  |
| PCGF1      | 0.73421949  | 1.92E-10 | SYT12      | -0.80074375  | 0.0083036 |
| AL356740.1 | 0.733860016 | 0.035601 | AC138028.6 | -0.801562305 | 0.0141336 |
| PPP2R3B    | 0.733858832 | 1.15E-12 | MCC        | -0.802062225 | 7.79E-05  |
| ZPR1       | 0.733807371 | 2.74E-17 | SLC12A5    | -0.802651386 | 2.56E-07  |
| MRPS24     | 0.733537952 | 1.58E-14 | N4BP2      | -0.803698948 | 3.41E-09  |
| SNHG26     | 0.733516243 | 9.52E-05 | RIN2       | -0.803753978 | 4.05E-06  |
| TIMM22     | 0.732865486 | 1.97E-13 | SLC22A18   | -0.803888825 | 7.35E-07  |
| DES11      | 0.732742005 | 3.33E-13 | TOP2A      | -0.806319635 | 9.25E-12  |



|              |             |          |            |              |           |
|--------------|-------------|----------|------------|--------------|-----------|
| MRPL3        | 0.732062462 | 2.44E-19 | DIPK1B     | -0.806417489 | 5.25E-05  |
| RBM28        | 0.731999696 | 1.33E-16 | IQCD       | -0.806708556 | 0.008763  |
| UTP20        | 0.731523858 | 2.51E-10 | CACFD1     | -0.80694733  | 4.15E-15  |
| WDR81        | 0.731381744 | 1.54E-11 | SMAD3      | -0.809573931 | 0.0014697 |
| RXYLT1       | 0.73024384  | 3.93E-11 | FRG1BP     | -0.810090129 | 9.61E-10  |
| MAPKAPK5-AS1 | 0.730168439 | 8.28E-12 | KIAA1217   | -0.810156179 | 1.15E-08  |
| SCARB1       | 0.729360865 | 7.46E-12 | FAM153CP   | -0.810340361 | 0.0160494 |
| NARS2        | 0.729065905 | 1.41E-10 | ZBTB46     | -0.810420111 | 1.91E-06  |
| ABLIM1       | 0.728960991 | 9.33E-09 | FAM161B    | -0.810721476 | 1.45E-05  |
| MLST8        | 0.728891023 | 2.29E-15 | AC093512.2 | -0.811026646 | 1.16E-05  |
| B3GALT6      | 0.728363838 | 5.24E-15 | BBOF1      | -0.811433515 | 3.48E-06  |
| WASF3        | 0.728257541 | 1.42E-06 | HR         | -0.811779022 | 4.30E-06  |
| SNHG9        | 0.728112003 | 0.018861 | ZSCAN30    | -0.811945586 | 2.97E-06  |
| ITPA         | 0.727874969 | 6.09E-18 | SORBS3     | -0.812598044 | 9.91E-12  |
| HMOX2        | 0.726912499 | 1.29E-20 | REEP1      | -0.812842438 | 0.0028667 |
| TMEM201      | 0.726477685 | 1.74E-13 | IGFBP5     | -0.813177538 | 1.13E-21  |
| MTHFD2       | 0.725848914 | 9.21E-21 | TMEM79     | -0.81444793  | 7.31E-07  |
| DDX31        | 0.72582628  | 5.62E-15 | LRRC37A3   | -0.814860802 | 7.79E-07  |
| TCOF1        | 0.725388912 | 2.35E-19 | RALY-AS1   | -0.815805551 | 0.0004816 |
| PMAIP1       | 0.725200653 | 0.00019  | AC055811.4 | -0.816180975 | 0.0045509 |
| MIF          | 0.724961595 | 1.23E-15 | RORA       | -0.816254187 | 0.0011191 |
| CRLS1        | 0.724304087 | 1.76E-09 | SAMD15     | -0.816279086 | 1.55E-06  |
| SSBP4        | 0.724282386 | 4.55E-17 | TAPBPL     | -0.816747109 | 3.10E-05  |
| PCCA-DT      | 0.724226982 | 0.000152 | DSCAM      | -0.816885911 | 0.005104  |
| URB1         | 0.724098095 | 6.83E-11 | ZFP36L2    | -0.816982887 | 8.14E-29  |
| FMC1         | 0.723872524 | 3.34E-09 | SLC7A2     | -0.817421834 | 1.25E-13  |
| NOP14        | 0.723662967 | 7.41E-16 | EIF4E3     | -0.817623263 | 4.21E-11  |
| INTS13       | 0.723266743 | 4.67E-14 | OR2A9P     | -0.818376606 | 0.0125287 |
| RCL1         | 0.722711317 | 5.80E-14 | NBPF4      | -0.819393742 | 6.77E-05  |
| UNKL         | 0.722683142 | 1.79E-13 | AC068580.4 | -0.819500948 | 0.001325  |
| SLC12A8      | 0.722520777 | 1.07E-05 | CRAT       | -0.819678149 | 0.0395656 |
| ATP1B3       | 0.722514543 | 1.30E-11 | OLFM1      | -0.820117406 | 1.57E-10  |
| MAK16        | 0.722411976 | 5.53E-12 | ZGRF1      | -0.820659529 | 2.81E-08  |
| AMPD2        | 0.722174886 | 4.74E-11 | IL1RAP     | -0.820776173 | 1.66E-05  |
| ISCA1        | 0.721569822 | 6.44E-14 | GPC1       | -0.820904071 | 3.30E-13  |
| CYC1         | 0.721341021 | 7.38E-23 | OCEL1      | -0.822623445 | 6.16E-07  |
| TARS3        | 0.721222248 | 1.33E-07 | KLF2       | -0.822750729 | 0.0203546 |
| KAT2A        | 0.721027381 | 2.21E-15 | KRT19      | -0.822796741 | 3.19E-10  |
| HYAL3        | 0.720451227 | 0.001061 | MICB       | -0.822809622 | 0.0002928 |
| NTMT1        | 0.719790894 | 1.58E-15 | TINCR      | -0.822846994 | 3.11E-07  |
| POLR2I       | 0.719654542 | 2.88E-12 | PRR15      | -0.823086909 | 3.38E-05  |
| SLC25A26     | 0.71906046  | 3.56E-10 | AP001816.1 | -0.823385998 | 9.22E-06  |
| SNU13        | 0.718175891 | 6.15E-24 | PMEL       | -0.82447646  | 0.0034885 |
| TANGO6       | 0.717984547 | 7.23E-09 | KLF8       | -0.825074631 | 0.0073373 |
| UBASH3B      | 0.717874503 | 0.019764 | IGF1R      | -0.827073657 | 1.03E-35  |
| MRPS25       | 0.717502139 | 1.45E-21 | ALPK1      | -0.827094916 | 8.47E-05  |
| GLB1L2       | 0.717471208 | 7.95E-13 | ULBP2      | -0.827315538 | 3.76E-10  |

|            |             |          |            |              |           |
|------------|-------------|----------|------------|--------------|-----------|
| ATAD3A     | 0.716697349 | 2.84E-24 | FOXP3      | -0.827658927 | 0.0429899 |
| SLC7A11    | 0.71659578  | 1.32E-07 | MKI67      | -0.828240271 | 5.11E-16  |
| QTRT1      | 0.716432549 | 3.37E-17 | C1orf115   | -0.828443958 | 5.21E-08  |
| TOMM22     | 0.716023856 | 4.09E-12 | GOLGB1     | -0.828618355 | 2.59E-23  |
| ZNF639     | 0.71568147  | 5.57E-17 | SYT1       | -0.828773803 | 1.33E-05  |
| ID3        | 0.715414405 | 1.29E-09 | ERV3-1     | -0.830067439 | 5.45E-06  |
| DDX51      | 0.714751813 | 7.76E-16 | FBXO27     | -0.830297327 | 0.0436209 |
| NEK6       | 0.714573598 | 1.37E-09 | ST8SIA6    | -0.830371289 | 4.07E-05  |
| GCSH       | 0.714223469 | 2.36E-15 | SMIM14     | -0.830445384 | 1.09E-17  |
| ESF1       | 0.71403578  | 8.94E-11 | KRT8       | -0.830974785 | 2.90E-11  |
| CAB39L     | 0.713217611 | 4.52E-05 | SENP7      | -0.831543976 | 5.33E-10  |
| GADD45GIP1 | 0.712957851 | 9.41E-16 | ZNF362     | -0.832100114 | 4.43E-10  |
| XPO5       | 0.712935662 | 1.08E-13 | EHBP1L1    | -0.832874724 | 5.36E-13  |
| RPF2       | 0.712189723 | 1.56E-11 | MRPL23-AS1 | -0.833179156 | 0.0010694 |
| STK26      | 0.711637875 | 3.26E-12 | RASSF8     | -0.833450843 | 1.62E-07  |
| EFHD2      | 0.711390733 | 3.54E-15 | TCAF1      | -0.833933438 | 5.66E-17  |
| SCLY       | 0.71127163  | 6.76E-14 | ADGRB2     | -0.838749822 | 0.0098531 |
| JMJD6      | 0.711221049 | 1.09E-12 | KIAA0513   | -0.839432715 | 9.37E-15  |
| NT5DC3     | 0.710969307 | 4.68E-06 | KRT80      | -0.841125233 | 1.33E-11  |
| MRPS34     | 0.710914449 | 7.61E-19 | EPOR       | -0.841700337 | 0.000379  |
| TIMM50     | 0.710650923 | 1.13E-21 | TK2        | -0.843496944 | 8.30E-06  |
| PEX10      | 0.709837364 | 2.56E-09 | LIPH       | -0.844258474 | 0.0011276 |
| MRPL15     | 0.709649366 | 7.35E-16 | CDK14      | -0.844736495 | 0.0067762 |
| SF3B5      | 0.709404237 | 2.47E-22 | MYO7A      | -0.844846229 | 0.0324271 |
| CLNS1A     | 0.70882362  | 5.32E-12 | OSBPL5     | -0.845254738 | 6.76E-08  |
| TSFM       | 0.7086269   | 2.60E-10 | RASA4CP    | -0.845370874 | 0.0147179 |
| MRPL1      | 0.70858082  | 1.08E-12 | MAF        | -0.845445628 | 0.0065056 |
| TUFM       | 0.708448525 | 1.88E-17 | ABHD2      | -0.845566574 | 0.0412739 |
| FAM3C2     | 0.708103799 | 0.00366  | ACSS3      | -0.845941978 | 2.10E-08  |
| TRMT10C    | 0.707820419 | 6.32E-11 | AC006372.1 | -0.845948427 | 0.0146324 |
| ADAM11     | 0.706700862 | 0.000607 | AGBL2      | -0.846213098 | 0.0124754 |
| NPM1       | 0.705823412 | 4.81E-15 | ESPN       | -0.847306667 | 6.80E-07  |
| XPOT       | 0.705696875 | 1.10E-17 | TNFAIP2    | -0.847533217 | 0.0384402 |
| POLR3D     | 0.70485217  | 2.48E-14 | TTC21A     | -0.847674006 | 0.0166096 |
| NUDT19     | 0.704032669 | 1.31E-11 | FUT8-AS1   | -0.8478552   | 0.006042  |
| PRMT3      | 0.703564018 | 6.33E-13 | PLXND1     | -0.848386054 | 1.45E-17  |
| SRXN1      | 0.702662886 | 1.75E-13 | PLA2G4F    | -0.848521801 | 8.99E-05  |
| GNL3       | 0.70220793  | 1.59E-16 | TRIM62     | -0.84913803  | 1.76E-12  |
| B4GALT3    | 0.702106792 | 1.56E-17 | GATA3      | -0.849330888 | 1.63E-20  |
| PAXIP1-AS1 | 0.702055693 | 6.38E-12 | ITGA7      | -0.850492855 | 0.0156913 |
| ZNF330     | 0.701890894 | 4.27E-10 | WLS        | -0.850722109 | 0.0011032 |
| GTF2H2     | 0.701819454 | 4.41E-12 | KLHDC9     | -0.85099221  | 0.0242706 |
| ARHGAP39   | 0.70121393  | 1.74E-14 | AL137003.1 | -0.851052359 | 0.0470462 |
| AC022966.1 | 0.700968592 | 1.85E-13 | FRMD5      | -0.852653075 | 0.0141318 |
| LOXL3      | 0.700845268 | 5.97E-05 | PRSS27     | -0.852807511 | 0.017591  |
| ERO1B      | 0.70063212  | 0.014082 | CAMK2N2    | -0.854062979 | 4.09E-06  |
| NFIA       | 0.700576152 | 0.00022  | SMPDL3A    | -0.854636786 | 4.00E-07  |

|            |             |          |            |              |           |
|------------|-------------|----------|------------|--------------|-----------|
| NOCT       | 0.700515247 | 3.59E-07 | GLB1L      | -0.855051022 | 9.21E-05  |
| FAM207A    | 0.700109356 | 8.30E-14 | TMPRSS4    | -0.855289668 | 0.0063721 |
| AL358472.6 | 0.699769761 | 2.83E-05 | KNDC1      | -0.855329943 | 0.0007302 |
| THOP1      | 0.699559444 | 4.17E-18 | EMP1       | -0.855547293 | 0.0055263 |
| POP1       | 0.699137021 | 8.59E-16 | KRTAP5-AS1 | -0.856069758 | 1.35E-06  |
| TMEM186    | 0.699022454 | 1.16E-09 | AC139769.1 | -0.85630836  | 0.0001489 |
| B4GALT2    | 0.698842153 | 4.95E-16 | SNN        | -0.856573424 | 3.64E-07  |
| HTRA2      | 0.698361461 | 7.05E-14 | TMEM229B   | -0.857196212 | 4.26E-08  |
| ACTR3B     | 0.698136203 | 2.05E-13 | RALGPS1    | -0.857523203 | 6.53E-08  |
| TMEM70     | 0.697185861 | 1.90E-14 | ZNF658B    | -0.85782226  | 0.0397839 |
| VASH1-AS1  | 0.697124307 | 2.07E-05 | NUTM2D     | -0.858198591 | 5.56E-05  |
| NOP2       | 0.696771759 | 1.84E-17 | PLK2       | -0.860064411 | 1.51E-25  |
| DHODH      | 0.69558877  | 8.69E-11 | FAM66C     | -0.860577824 | 0.0020873 |
| SLC7A6     | 0.695270501 | 3.94E-07 | CU633904.2 | -0.860860857 | 0.025038  |
| ALG3       | 0.695180147 | 1.15E-16 | HJURP      | -0.861419982 | 8.15E-10  |
| BYSL       | 0.694996976 | 1.88E-15 | TMPRSS3    | -0.862478098 | 0.0377129 |
| LRIG3      | 0.693712831 | 0.000516 | PLEKHA2    | -0.863306236 | 3.14E-10  |
| FAS        | 0.693315253 | 4.97E-09 | BX322234.1 | -0.86566341  | 0.0485586 |
| MARC1      | 0.692783863 | 5.53E-07 | BAIAP3     | -0.866155169 | 4.62E-05  |
| NDUFAB1    | 0.6927521   | 4.35E-15 | HHAT       | -0.866944444 | 1.98E-05  |
| SMIM4      | 0.692497023 | 0.000168 | AC104452.1 | -0.867158567 | 0.0102589 |
| TRMU       | 0.692237585 | 4.39E-13 | SUCLG2-AS1 | -0.867219501 | 0.0282116 |
| NETO2      | 0.691729677 | 1.72E-16 | RAB8B      | -0.867279048 | 1.93E-10  |
| CU633906.7 | 0.69157107  | 9.61E-05 | CLU        | -0.867302924 | 2.05E-19  |
| PFAS       | 0.691283385 | 6.02E-12 | SLC22A15   | -0.867328255 | 5.25E-08  |
| POLRMT     | 0.690461775 | 7.30E-15 | PRODH      | -0.86988568  | 0.018116  |
| MPLKIP     | 0.69038057  | 2.53E-11 | MTMR7      | -0.870011155 | 0.0096972 |
| TUBGCP4    | 0.688646309 | 2.08E-08 | CCDC153    | -0.870601697 | 0.0024667 |
| GTF3A      | 0.688090824 | 6.41E-22 | HDAC6      | -0.870664701 | 3.23E-16  |
| RAB17      | 0.688034802 | 1.62E-09 | SELENBP1   | -0.872450692 | 0.002947  |
| CSPG5      | 0.687999717 | 0.00457  | ETHE1      | -0.87268505  | 4.35E-05  |
| MRPL52     | 0.687528461 | 2.08E-10 | CCM2L      | -0.872783801 | 0.0110675 |
| PDCD11     | 0.687488614 | 1.83E-13 | CRYBG3     | -0.873738484 | 0.0003015 |
| NIIPB12    | 0.687094751 | 1.66E-06 | KIF24      | -0.874029984 | 6.27E-07  |
| CHAC2      | 0.686912073 | 1.86E-08 | COL5A2     | -0.874239401 | 3.76E-07  |
| URI1       | 0.686833632 | 3.33E-15 | DSC2       | -0.87472035  | 2.09E-17  |
| SIX1       | 0.686692722 | 2.16E-06 | TET1       | -0.87481619  | 0.0389591 |
| CEBPB      | 0.686613922 | 1.69E-11 | TRPV4      | -0.875206511 | 1.67E-06  |
| EIF3J      | 0.685965072 | 4.22E-21 | PAC SIN1   | -0.875213411 | 3.22E-10  |
| AC097448.1 | 0.685041089 | 0.000384 | NOS1AP     | -0.875282312 | 0.0003615 |
| SNAPC4     | 0.684941511 | 1.51E-12 | ARHGEF10L  | -0.875826478 | 7.92E-11  |
| UTP25      | 0.68424474  | 8.44E-11 | ERICH6-AS1 | -0.876583873 | 0.0317528 |
| ATP5MC1    | 0.684110699 | 2.21E-19 | GDPD3      | -0.877508888 | 1.25E-08  |
| AL441992.3 | 0.683992796 | 0.001752 | STX1B      | -0.87792875  | 0.0122421 |
| GALK2      | 0.683481518 | 4.51E-07 | NEMP2      | -0.878232548 | 2.95E-07  |
| ELAC2      | 0.683388069 | 1.89E-17 | HMGB2      | -0.878323959 | 0.0083677 |
| SNHG17     | 0.683138322 | 1.62E-09 | ARHGAP29   | -0.879046476 | 5.18E-11  |

|              |             |          |            |              |           |
|--------------|-------------|----------|------------|--------------|-----------|
| CDK5R1       | 0.681780923 | 0.000984 | TIGD7      | -0.879119005 | 0.005432  |
| BZW2         | 0.681007235 | 5.11E-16 | SYCP2      | -0.879471632 | 1.48E-15  |
| CLCN2        | 0.680983764 | 3.78E-05 | ADD3       | -0.881333177 | 0.0001453 |
| AGPAT5       | 0.680734456 | 1.54E-15 | EPPK1      | -0.881376938 | 9.87E-22  |
| EMC8         | 0.678289436 | 9.94E-15 | SLC8B1     | -0.882137201 | 3.81E-06  |
| ANKRD27      | 0.678127972 | 1.99E-09 | PLAAT3     | -0.882889275 | 8.37E-09  |
| NDUFB9       | 0.677939916 | 2.80E-18 | AC126564.1 | -0.883052711 | 6.41E-08  |
| CFAP97       | 0.677754028 | 2.17E-09 | RAB32      | -0.88390017  | 5.22E-12  |
| EBNA1BP2     | 0.677350859 | 4.21E-19 | SH3TC1     | -0.884141133 | 3.23E-05  |
| USP2         | 0.677254212 | 0.000575 | BMERB1     | -0.884930487 | 7.92E-06  |
| PHKA1        | 0.677046029 | 9.55E-09 | PLA2G10    | -0.885254765 | 0.0104721 |
| PROCR        | 0.676616358 | 0.000291 | CYLD       | -0.885381676 | 1.79E-14  |
| RN7SL3       | 0.676463492 | 0.004307 | KRT18      | -0.885798912 | 3.30E-13  |
| PRELID1      | 0.67608741  | 2.64E-23 | SLC66A3    | -0.88616191  | 5.51E-11  |
| BRAT1        | 0.675717574 | 2.22E-16 | LINC01137  | -0.886169249 | 0.0037691 |
| NOL10        | 0.675240472 | 1.06E-13 | KAAG1      | -0.88669885  | 0.0303421 |
| FLVCR1       | 0.6749699   | 8.48E-06 | F2R        | -0.887500389 | 0.0001382 |
| MRPS27       | 0.674613443 | 1.92E-13 | MAP1B      | -0.88767664  | 0.0164858 |
| RRAS2        | 0.674305627 | 3.09E-14 | CLDN9      | -0.888013448 | 2.85E-08  |
| EIF3B        | 0.673748137 | 1.97E-17 | PCOLCE     | -0.888057094 | 1.66E-06  |
| NCL          | 0.673421576 | 7.95E-20 | TRIM29     | -0.888585056 | 0.0071131 |
| RAPGEF5      | 0.672851738 | 0.008279 | H1-0       | -0.888817474 | 8.98E-05  |
| MRPL32       | 0.672802009 | 1.91E-17 | RALGPS2    | -0.888841543 | 5.89E-09  |
| ZNF276       | 0.672144068 | 2.26E-08 | MBOAT2     | -0.889877406 | 4.75E-18  |
| TMEM147      | 0.671519083 | 9.33E-17 | SEMA3F     | -0.89008099  | 4.32E-11  |
| KREMEN2      | 0.670728536 | 0.000401 | HDAC11     | -0.890815703 | 3.46E-09  |
| PYCR1        | 0.670698532 | 6.95E-17 | NAIPP2     | -0.891245896 | 0.0013709 |
| POLG2        | 0.67021337  | 1.36E-10 | CTSD       | -0.891417845 | 0.0469393 |
| COA7         | 0.669837126 | 8.57E-14 | GYG2       | -0.891963704 | 0.0195031 |
| NOC2L        | 0.669762025 | 1.63E-21 | ACSS2      | -0.892497759 | 5.58E-13  |
| PRPS1        | 0.669488054 | 4.72E-11 | DISP1      | -0.893548194 | 0.0004502 |
| AL121832.2   | 0.668469931 | 0.013652 | ZG16B      | -0.894669879 | 4.61E-08  |
| SGTA         | 0.667934705 | 1.97E-18 | SRR        | -0.89487736  | 3.11E-07  |
| CDR2L        | 0.667498056 | 6.72E-14 | ARNTL      | -0.895944126 | 3.22E-07  |
| FOXO3B       | 0.667079063 | 0.000592 | VWA5B2     | -0.896713207 | 0.0254876 |
| ABCF2_2      | 0.666965133 | 8.28E-23 | CTDSP2     | -0.896935845 | 1.18E-19  |
| ATAD3B       | 0.66666867  | 2.08E-12 | SLC16A13   | -0.896955648 | 5.83E-06  |
| ZNF749       | 0.666552031 | 0.000412 | ATP6V0A4   | -0.897021095 | 6.03E-11  |
| ATP6V1E2     | 0.666085092 | 1.12E-05 | ZNF365     | -0.897661867 | 5.37E-05  |
| ATP5F1D      | 0.665306144 | 1.18E-22 | MAPK11     | -0.898026638 | 2.29E-12  |
| METTL5       | 0.664930418 | 3.70E-10 | RAP1GAP    | -0.898051482 | 7.92E-14  |
| ABHD14A-ACY1 | 0.664607055 | 0.039628 | ZNF678     | -0.900411817 | 5.01E-06  |
| DOCK4        | 0.664547002 | 0.016784 | SCNN1A     | -0.900415138 | 6.38E-06  |
| DUSP14       | 0.663981142 | 7.92E-11 | IFNLR1     | -0.901559078 | 0.0489191 |
| GID4         | 0.66392209  | 0.000177 | NPHP3      | -0.902946301 | 1.36E-10  |
| FBXO31       | 0.663868933 | 2.42E-11 | RRAS       | -0.903100097 | 1.61E-11  |
| ZNF584       | 0.661225778 | 5.20E-07 | AC021066.1 | -0.903274744 | 4.36E-22  |

|             |             |          |            |              |           |
|-------------|-------------|----------|------------|--------------|-----------|
| MRRF        | 0.661111175 | 6.75E-14 | POLD4      | -0.904907727 | 3.60E-18  |
| PDK1        | 0.660640643 | 8.88E-06 | MICAL1     | -0.905778189 | 1.42E-14  |
| AC004980.1  | 0.659746848 | 0.029072 | UNC13D     | -0.907601799 | 1.17E-18  |
| GATAD2A     | 0.659508825 | 1.99E-12 | AL136295.1 | -0.909047367 | 0.0394381 |
| NDUFAF5     | 0.659111805 | 3.76E-07 | PAQR7      | -0.909192695 | 3.47E-06  |
| PFDN4       | 0.659097177 | 3.00E-11 | RHOU       | -0.90929683  | 2.83E-11  |
| SLC16A1-AS1 | 0.659020958 | 0.044182 | ABLIM2     | -0.909604151 | 0.0092706 |
| RWDD4       | 0.658931064 | 1.13E-11 | LINC01503  | -0.909727904 | 0.0016431 |
| KLF16       | 0.658858827 | 7.50E-13 | MDGA2      | -0.909965801 | 0.0055185 |
| DNAJA3      | 0.658582367 | 2.25E-16 | ZNF610     | -0.910093358 | 0.0262654 |
| POLR1D      | 0.658422768 | 1.10E-10 | LNCAROD    | -0.910545541 | 0.0051672 |
| DNPH1       | 0.65831882  | 7.78E-12 | C4orf33    | -0.911645437 | 0.0009476 |
| MEMO1       | 0.657908871 | 4.40E-09 | DENND3     | -0.911820867 | 1.34E-09  |
| FBXO45      | 0.657902572 | 3.18E-20 | SFXN5      | -0.913262706 | 8.16E-10  |
| GCAT        | 0.657832537 | 2.25E-07 | PYROXD2    | -0.914291775 | 1.18E-08  |
| TEAD4       | 0.656728917 | 1.08E-09 | SYNGR3     | -0.914634289 | 1.73E-07  |
| SAC3D1      | 0.656606381 | 9.73E-14 | FOS        | -0.914921929 | 4.71E-19  |
| ABCE1       | 0.656321529 | 1.04E-14 | TUBB3      | -0.914958875 | 6.86E-17  |
| WDR90       | 0.656271997 | 8.96E-05 | MACF1      | -0.915528596 | 2.86E-11  |
| SEPTIN6     | 0.656041382 | 0.044072 | PBLD       | -0.91671231  | 5.82E-07  |
| ENDOG       | 0.655701843 | 1.73E-13 | TRGV9      | -0.917281499 | 0.0014468 |
| TSPO        | 0.655428689 | 1.18E-13 | RGS12      | -0.918459974 | 6.34E-07  |
| ANGEL1      | 0.65520227  | 2.43E-07 | DOCK11     | -0.918619079 | 3.86E-09  |
| MRPL21      | 0.654837279 | 2.34E-10 | MIR9-3HG   | -0.919082037 | 8.86E-05  |
| CDK20       | 0.654433141 | 6.65E-10 | MUC20      | -0.919906952 | 5.00E-10  |
| RALGDS      | 0.654201371 | 2.39E-10 | MYOF       | -0.920522598 | 5.37E-18  |
| LONP1       | 0.653280701 | 2.21E-14 | CCHCR1     | -0.920790044 | 1.13E-05  |
| GAR1        | 0.652878388 | 3.68E-09 | ARHGEF37   | -0.921883201 | 0.0037704 |
| SETD6       | 0.652604186 | 1.35E-09 | CLEC2D     | -0.922058769 | 8.10E-05  |
| GTF2H2B     | 0.652131425 | 0.002814 | AL590822.3 | -0.922840717 | 0.0301866 |
| NUDT4P2     | 0.651913667 | 0.035694 | CEACAM6    | -0.92298567  | 1.98E-19  |
| TSEN2       | 0.651380081 | 8.69E-11 | MATN2      | -0.923459191 | 3.04E-11  |
| TBC1D14     | 0.651254097 | 6.79E-10 | GPR137C    | -0.923507575 | 1.53E-05  |
| ABT1        | 0.65103584  | 2.85E-14 | CLTCL1     | -0.926037949 | 2.12E-07  |
| TRIB1       | 0.650944105 | 5.35E-06 | USH1G      | -0.926260551 | 0.0006889 |
| MTHFD1L     | 0.65071439  | 2.05E-19 | ZNF879     | -0.926876535 | 0.0076357 |
| COX5A       | 0.650649574 | 2.64E-17 | GNA14      | -0.92737326  | 0.0281891 |
| CCDC124     | 0.650196008 | 7.61E-16 | TMEM8B     | -0.927782979 | 0.0001469 |
| AL034430.1  | 0.649919923 | 0.011925 | SPATA6     | -0.930813512 | 0.0034154 |
| GPR63       | 0.649370542 | 0.018067 | TRIM45     | -0.931677477 | 5.65E-13  |
| RTKN        | 0.649309382 | 1.45E-12 | SYNE3      | -0.931786548 | 0.0058224 |
| SPG21       | 0.648995732 | 5.64E-14 | ZNF66      | -0.932026649 | 0.0020138 |
| MFSD12      | 0.648231342 | 4.98E-12 | CCDC170    | -0.932656326 | 3.75E-11  |
| FDXR        | 0.64819946  | 1.23E-10 | TTC39B     | -0.932873093 | 0.0205114 |
| WDR46       | 0.646896949 | 1.90E-18 | AL022069.3 | -0.933128369 | 0.006951  |
| CBWD6       | 0.64677294  | 2.27E-05 | SRRM2-AS1  | -0.933612829 | 0.0001783 |
| SLC9A3R2    | 0.646583552 | 3.26E-11 | AC016705.2 | -0.933663847 | 0.0353214 |

|              |             |          |            |              |           |
|--------------|-------------|----------|------------|--------------|-----------|
| DBP          | 0.646451045 | 0.003532 | PCDHGB5    | -0.934106057 | 3.49E-14  |
| PPM1F        | 0.646426909 | 3.36E-14 | EXT1       | -0.934212915 | 4.28E-08  |
| IFRD1        | 0.64642446  | 4.95E-20 | RFTN2      | -0.934291224 | 0.0019642 |
| DEGS1        | 0.645764706 | 2.50E-10 | GABRP      | -0.934404822 | 0.01123   |
| PRTG         | 0.645188119 | 0.000258 | LOXL1      | -0.936761445 | 0.0246641 |
| KTI12        | 0.645121475 | 1.11E-07 | CAPS       | -0.936867875 | 0.0040866 |
| BOLA2-SMG1P6 | 0.644979318 | 1.30E-12 | PTK2B      | -0.937159796 | 2.74E-07  |
| GART         | 0.644711672 | 2.46E-13 | Z99129.4   | -0.938190652 | 0.0118253 |
| SPR          | 0.644711386 | 3.33E-18 | TMEM154    | -0.938600614 | 0.0014534 |
| SPATA5L1     | 0.644622803 | 2.74E-07 | CYP4F11    | -0.939436575 | 0.001459  |
| ZNF787       | 0.644233578 | 3.09E-05 | ZNF211     | -0.939642423 | 0.0001106 |
| UTP15        | 0.644080427 | 1.37E-13 | ADSS1      | -0.93991753  | 1.62E-08  |
| SRRD         | 0.643906165 | 1.67E-09 | C4A        | -0.940440177 | 0.0035477 |
| EFNA3        | 0.64374475  | 0.000715 | VPS9D1     | -0.941278814 | 5.60E-10  |
| HAUS7        | 0.643499234 | 1.38E-10 | SEPTIN10   | -0.942009584 | 2.54E-07  |
| TMEM243      | 0.642825808 | 1.42E-15 | SAP30L-AS1 | -0.942124501 | 0.0058494 |
| ATP11C       | 0.642820712 | 6.54E-09 | DDX60L     | -0.943190493 | 0.004228  |
| CA5BP1       | 0.642633187 | 7.00E-05 | DNAH7      | -0.944508999 | 0.0170941 |
| IL27RA       | 0.642481649 | 1.50E-05 | ZNF709     | -0.947301128 | 0.014345  |
| ACTR5        | 0.642050228 | 6.63E-06 | TENT5A     | -0.947384787 | 4.11E-09  |
| ATP5F1B      | 0.64191339  | 2.39E-20 | ALOX15     | -0.948201042 | 4.62E-10  |
| PFDN6        | 0.641791284 | 1.89E-12 | CTSO       | -0.948951539 | 3.09E-05  |
| FCHO1        | 0.641331844 | 8.21E-09 | RNF213-AS1 | -0.950009908 | 0.0380117 |
| CDV3         | 0.64124548  | 1.84E-18 | HIPK1-AS1  | -0.952644675 | 0.0231441 |
| ALG1         | 0.640829485 | 1.97E-17 | CIT        | -0.952765466 | 1.31E-11  |
| NUS1         | 0.640765319 | 4.40E-11 | AC144450.1 | -0.955166959 | 0.0040746 |
| NAT9         | 0.640629453 | 6.67E-09 | SLC22A17   | -0.955478859 | 4.49E-05  |
| MRPL16       | 0.640419406 | 9.13E-11 | NRP1       | -0.957505542 | 5.49E-19  |
| PPAT         | 0.639516127 | 1.31E-17 | PLTP       | -0.95784707  | 0.0069826 |
| DFFA         | 0.639492809 | 6.20E-13 | RNFT1      | -0.959073278 | 3.03E-06  |
| TLCD1        | 0.639492337 | 2.81E-07 | NAALADL2   | -0.95911695  | 0.0391241 |
| PPID         | 0.639347234 | 1.49E-09 | DPYSL2     | -0.959151972 | 6.81E-09  |
| SEH1L        | 0.639149106 | 1.52E-14 | S1PR3      | -0.960313696 | 3.38E-15  |
| MICOS13      | 0.638780059 | 4.22E-10 | BRIP1      | -0.961091602 | 4.82E-18  |
| PPA1         | 0.638014656 | 3.97E-13 | RNFT2      | -0.961773411 | 6.58E-07  |
| FAM210A      | 0.637527614 | 1.34E-07 | RTN2       | -0.962521319 | 0.0042487 |
| DHX33        | 0.637526663 | 9.55E-10 | LNCOC1     | -0.962686561 | 0.0108158 |
| CENPX        | 0.637094614 | 3.45E-20 | FLNA       | -0.962712571 | 4.11E-34  |
| SURF6        | 0.636152866 | 6.69E-12 | RGS9       | -0.96285275  | 0.0095692 |
| GEMIN7       | 0.635482171 | 1.46E-12 | AP002761.4 | -0.963300766 | 1.27E-17  |
| MAFK         | 0.63545022  | 8.11E-08 | TMEM139    | -0.964503891 | 5.17E-05  |
| TNPO2        | 0.634345261 | 1.88E-18 | TPI1P2     | -0.964925132 | 0.0083868 |
| MRI1         | 0.634307512 | 3.83E-13 | SRGAP2     | -0.964994528 | 1.76E-16  |
| AC006504.5   | 0.634054459 | 0.001416 | NTN4       | -0.965845063 | 0.0036184 |
| HAGHL        | 0.633968693 | 4.19E-13 | LRRCC1     | -0.966161678 | 5.26E-08  |
| ZNRD1        | 0.633835823 | 2.51E-06 | CATSPERG   | -0.966527763 | 0.0076745 |
| LTV1         | 0.633806694 | 1.47E-14 | ELFN1      | -0.967005638 | 6.48E-09  |

|            |             |          |            |              |           |
|------------|-------------|----------|------------|--------------|-----------|
| ITGB1BP1   | 0.633518394 | 3.65E-14 | RNF224     | -0.968088273 | 0.0001042 |
| ISYNA1     | 0.633504827 | 4.28E-10 | RDX        | -0.968163977 | 2.34E-34  |
| ACTA2      | 0.633428713 | 0.000166 | BTG1       | -0.968165605 | 5.70E-20  |
| C3orf52    | 0.633425171 | 0.008829 | CKAP2L     | -0.968557622 | 8.37E-08  |
| ZNF485     | 0.632819117 | 1.07E-05 | CTAGE15    | -0.968757877 | 0.0195262 |
| KARS1      | 0.632580798 | 3.71E-14 | MYEOV      | -0.969845081 | 5.21E-14  |
| DGKE       | 0.632216338 | 7.58E-09 | AMOTL1     | -0.970006022 | 4.41E-13  |
| PA2G4      | 0.632180996 | 1.27E-22 | KLF12      | -0.971287891 | 4.39E-07  |
| GNAS-AS1   | 0.632147602 | 0.007982 | HCAR3      | -0.972270826 | 0.013065  |
| RP9        | 0.632099945 | 1.09E-07 | ANXA6      | -0.97281881  | 8.34E-19  |
| PAX9       | 0.631886644 | 2.81E-07 | TRIM16     | -0.972936599 | 1.07E-16  |
| JTB        | 0.631390767 | 6.97E-15 | ARID5B     | -0.973994469 | 1.17E-12  |
| PITPNC1    | 0.631235974 | 3.94E-13 | AC004943.2 | -0.974252486 | 5.77E-08  |
| EIF1AX     | 0.631179694 | 9.83E-12 | SOCS1      | -0.97543058  | 0.0361948 |
| USP18      | 0.63063419  | 5.18E-06 | AC015712.6 | -0.977860327 | 4.19E-05  |
| UAP1       | 0.630385361 | 9.45E-11 | SLCO3A1    | -0.978375425 | 7.48E-07  |
| FARSA      | 0.630238102 | 1.95E-20 | ITPRIP     | -0.978470739 | 7.73E-08  |
| MRPL30     | 0.629709208 | 1.61E-13 | LAMA3      | -0.978745351 | 0.00319   |
| PEBP1      | 0.629491965 | 4.25E-19 | TNS3       | -0.979659809 | 0.0008712 |
| NDUFAB1    | 0.629077185 | 1.01E-06 | PLA2G4C    | -0.979867176 | 0.0006889 |
| RUVBL2     | 0.629044335 | 1.55E-13 | VSIR       | -0.980846253 | 0.0087251 |
| HSPA12B    | 0.628273086 | 0.035156 | C3orf67    | -0.981098048 | 0.0015398 |
| SURF2      | 0.628272635 | 4.66E-11 | SH3TC2     | -0.982793655 | 0.0045543 |
| ZBTB45P2   | 0.626953686 | 0.011216 | KYNU       | -0.983244227 | 2.01E-07  |
| CLDN15     | 0.62630726  | 0.000105 | AC159540.2 | -0.983491984 | 0.0002564 |
| PSPH       | 0.626174946 | 1.79E-09 | STARD8     | -0.983775296 | 0.0390749 |
| NUDCD1     | 0.626088262 | 5.75E-16 | MAPK8IP1   | -0.983818818 | 0.000207  |
| MTFMT      | 0.625980236 | 6.69E-08 | IFITM10    | -0.984059643 | 0.0287052 |
| DUSP7      | 0.62588426  | 2.84E-05 | AQP3       | -0.985639407 | 2.93E-10  |
| ZMYND19    | 0.625327182 | 8.26E-20 | SYT10      | -0.985863421 | 3.68E-11  |
| CEBPZ      | 0.625135562 | 5.91E-13 | CDC25C     | -0.985956049 | 1.84E-07  |
| WDR36      | 0.625031287 | 7.49E-10 | TRGC1      | -0.986147891 | 1.67E-33  |
| LDHA       | 0.625019399 | 1.26E-08 | ZSWIM4     | -0.986275554 | 3.21E-07  |
| EIF2A      | 0.624664799 | 3.46E-10 | LINC01963  | -0.987042625 | 3.17E-06  |
| AUP1       | 0.624552014 | 1.51E-15 | BTC        | -0.988261384 | 2.75E-07  |
| NDUFB8     | 0.624345273 | 2.99E-08 | C1QTNF6    | -0.988415842 | 7.47E-31  |
| TIMM8A     | 0.624241897 | 2.19E-12 | PSCA       | -0.988495308 | 0.0001142 |
| PRR22      | 0.624238361 | 0.004925 | AP006222.1 | -0.989338861 | 2.83E-07  |
| PSMB5      | 0.62416494  | 1.14E-14 | MARCKS     | -0.989597713 | 1.50E-17  |
| MRPL12     | 0.6239444   | 2.50E-10 | GRHL3      | -0.989723025 | 3.43E-28  |
| EMC6       | 0.623700299 | 7.55E-12 | PCDHA12    | -0.990669733 | 0.0019249 |
| ANKS3      | 0.623239228 | 5.81E-09 | AC015802.1 | -0.991440545 | 0.0388354 |
| AC114271.1 | 0.622958439 | 0.015309 | SYNPO      | -0.992586686 | 2.00E-05  |
| H2BC11     | 0.622767019 | 0.019936 | SSPO       | -0.992826808 | 6.59E-05  |
| APIP       | 0.622374609 | 7.01E-06 | APCDD1     | -0.992828611 | 6.32E-05  |
| NOC4L      | 0.622302703 | 4.44E-11 | VASH1      | -0.994393664 | 1.33E-12  |
| FASTKD3    | 0.62180329  | 7.17E-05 | STARD13    | -0.994730992 | 0.0007905 |

|            |             |          |            |              |           |
|------------|-------------|----------|------------|--------------|-----------|
| EXOSC3     | 0.621626931 | 2.41E-10 | GPX3       | -0.994774264 | 7.65E-11  |
| RPL22L1    | 0.621585192 | 1.37E-08 | ZNF682     | -0.995247749 | 0.0044368 |
| RRP7BP     | 0.621516684 | 5.36E-05 | CCDC171    | -0.997166888 | 0.0193131 |
| AC002310.5 | 0.621401402 | 0.009302 | EHD2       | -0.997901997 | 1.46E-09  |
| XPO6       | 0.620850243 | 1.79E-14 | MUC1       | -0.997992192 | 6.83E-07  |
| SMIM20     | 0.620537121 | 2.68E-05 | NGEF       | -0.999068191 | 0.0145388 |
| NT5C3A     | 0.620245901 | 6.79E-09 | ENTPD2     | -0.999475794 | 8.40E-05  |
| DKC1       | 0.619408643 | 4.95E-20 | ADAMTSL5   | -1.000342141 | 4.42E-06  |
| MTHFD2L    | 0.619295051 | 3.25E-05 | ACOT4      | -1.000668481 | 1.61E-07  |
| TASOR2     | 0.6189657   | 1.07E-07 | CALML5     | -1.001766493 | 0.0015944 |
| INTS10     | 0.618933383 | 3.39E-10 | GMDS-DT    | -1.002011811 | 0.0142927 |
| MRGBP      | 0.618705438 | 6.38E-12 | CCDC15     | -1.002730346 | 0.0002875 |
| UQCC3      | 0.618107567 | 1.32E-09 | CMTM3      | -1.002740243 | 0.0052823 |
| CAD        | 0.617308914 | 2.55E-13 | LINC00461  | -1.003019559 | 0.0034559 |
| UBE2S      | 0.617140785 | 6.45E-11 | MBOAT1     | -1.003227997 | 0.0150623 |
| SLC30A1    | 0.61681753  | 3.27E-08 | COL6A2     | -1.003283171 | 1.21E-05  |
| MAPK15     | 0.615751443 | 0.000932 | HSPA2      | -1.003297222 | 4.62E-08  |
| WDR18      | 0.615697355 | 6.99E-12 | AL139385.1 | -1.003805644 | 0.0010118 |
| FAM86B1    | 0.615596919 | 6.07E-06 | KRT15      | -1.004003746 | 0.0320217 |
| TFR2       | 0.615484992 | 0.001332 | ZNF750     | -1.004086946 | 0.0045225 |
| FTSJ1      | 0.61484435  | 2.82E-12 | E2F2       | -1.004469997 | 1.19E-06  |
| PGAM5      | 0.614432026 | 1.18E-14 | HERC6      | -1.004678046 | 3.60E-07  |
| DMKN       | 0.614307812 | 9.28E-15 | CASTOR1    | -1.004830014 | 0.000941  |
| COX10      | 0.614091764 | 2.23E-07 | FAM66D     | -1.005207646 | 0.0009111 |
| IPO5       | 0.613609812 | 1.54E-10 | LINC00689  | -1.005274421 | 0.0197789 |
| AGTRAP     | 0.613131502 | 1.35E-08 | SLCO4C1    | -1.005356091 | 7.72E-06  |
| ACBD6      | 0.613033833 | 8.55E-13 | GNG7       | -1.006183365 | 0.0002284 |
| MRPL45     | 0.612448136 | 3.33E-09 | DIRC3      | -1.00634567  | 0.0011593 |
| SMYD5      | 0.611950691 | 7.02E-11 | MT2A       | -1.006598072 | 0.0030086 |
| WDR35      | 0.611628815 | 1.20E-07 | ATP2A3     | -1.006613783 | 5.92E-57  |
| PTDSS2     | 0.611294292 | 1.72E-10 | BMP8A      | -1.007205292 | 0.0242706 |
| PDCD5      | 0.611249193 | 1.39E-12 | ZNF462     | -1.007773024 | 5.37E-15  |
| TOMM6      | 0.611160888 | 5.41E-11 | ADORA1     | -1.007906838 | 0.0372645 |
| ASH1L-AS1  | 0.610256394 | 0.012467 | PAPLN      | -1.00792924  | 8.63E-06  |
| FBXO22     | 0.610127615 | 4.72E-15 | C2orf72    | -1.009667176 | 0.0001767 |
| DHX34      | 0.609436855 | 3.98E-09 | SLC25A42   | -1.009977191 | 1.30E-12  |
| MDN1       | 0.60889431  | 4.84E-07 | CEACAM5    | -1.010227784 | 0.0026929 |
| NUDT5      | 0.608823752 | 1.37E-13 | ITGA5      | -1.011490865 | 4.70E-19  |
| NP1PB11    | 0.608735227 | 0.005712 | PRRT2      | -1.012601992 | 2.61E-06  |
| RPL14      | 0.608479674 | 1.84E-12 | ARSD       | -1.012632602 | 1.83E-24  |
| STOML2     | 0.608233059 | 7.79E-13 | BDKRB2     | -1.012914428 | 4.58E-13  |
| CEP83      | 0.608220744 | 4.24E-08 | NCAM2      | -1.0130818   | 7.08E-18  |
| FBXL4      | 0.606977119 | 5.49E-07 | MYZAP      | -1.013541053 | 2.78E-07  |
| TIMM23     | 0.606898149 | 3.09E-14 | SLC2A10    | -1.014390919 | 7.22E-17  |
| TTC27      | 0.606125554 | 6.61E-08 | TIGD3      | -1.014988782 | 0.004624  |
| RPRD1A     | 0.605805453 | 5.96E-11 | AC104825.1 | -1.016530884 | 0.0032191 |
| MNT        | 0.605786773 | 1.02E-05 | ITGA2      | -1.016970199 | 9.03E-23  |



|            |             |          |            |              |           |
|------------|-------------|----------|------------|--------------|-----------|
| UTP4       | 0.60565262  | 1.33E-15 | HIVEP3     | -1.017280733 | 0.0001509 |
| NTPCR      | 0.605614759 | 4.64E-09 | C18orf54   | -1.01769134  | 1.01E-06  |
| RELT       | 0.605378171 | 2.13E-07 | IKZF2      | -1.018439787 | 1.02E-09  |
| RABGGTB    | 0.605334614 | 8.17E-12 | DGCR9      | -1.020001572 | 0.0072835 |
| TFRC       | 0.60447394  | 1.52E-10 | ARL4C      | -1.02062517  | 8.60E-07  |
| AC008966.1 | 0.604127581 | 0.000978 | SLC25A35   | -1.022191837 | 0.0016001 |
| ZNF331     | 0.604048861 | 1.46E-05 | SGMS1-AS1  | -1.022544104 | 0.0006452 |
| PRDX6      | 0.603817992 | 2.55E-15 | HEG1       | -1.022609759 | 6.78E-06  |
| UTP6       | 0.603814783 | 1.75E-11 | PLCD1      | -1.022915689 | 0.0017578 |
| TRAF4      | 0.603230068 | 2.88E-09 | RAB19      | -1.023021508 | 0.0001244 |
| PRKX       | 0.602817194 | 3.31E-09 | CEMIP2     | -1.023466088 | 1.60E-27  |
| PPT2-EGFL8 | 0.602728999 | 0.005262 | PLEKHO2    | -1.024849616 | 0.000206  |
| NDUFAF7    | 0.602625936 | 2.85E-06 | PRIMA1     | -1.025396782 | 0.016811  |
| WDR27      | 0.602588255 | 2.76E-07 | RARA       | -1.026862341 | 0.0034908 |
| SETDB2     | 0.601677547 | 0.000293 | AL359258.3 | -1.027423568 | 0.0085551 |
| NOL7       | 0.601420563 | 1.84E-12 | HELZ2      | -1.030018674 | 2.29E-15  |
| UTP23      | 0.601218689 | 9.43E-09 | IGDCC3     | -1.031327911 | 0.0002921 |
| SRPRB      | 0.600982155 | 1.68E-12 | AC245297.1 | -1.032800431 | 0.0067687 |
| TIMM9      | 0.600755713 | 5.28E-08 | PPL        | -1.032868343 | 2.44E-42  |
| LRPPRC     | 0.600504511 | 3.88E-12 | CCDC69     | -1.035766547 | 3.54E-07  |
| ZNF581     | 0.600162328 | 3.96E-05 | ALDH6A1    | -1.035936196 | 6.90E-13  |
| SLC25A12   | 0.599834967 | 4.60E-05 | P2RX2      | -1.036758938 | 0.0044631 |
| ANTKMT     | 0.599644257 | 2.30E-10 | ALPK3      | -1.037087978 | 2.01E-05  |
| PDHA1      | 0.599276488 | 1.37E-16 | ZNF117     | -1.037371828 | 2.71E-14  |
| ZNF770     | 0.598899163 | 1.85E-07 | AC068580.3 | -1.039807181 | 0.0250683 |
| WRAP73     | 0.598194121 | 6.53E-08 | ZBED6      | -1.039884427 | 0.0119865 |
| SPATC1L    | 0.597829887 | 0.000216 | PCDH1      | -1.040647521 | 1.25E-16  |
| MRPL46     | 0.597639328 | 2.13E-09 | SYNM       | -1.040700356 | 2.38E-07  |
| FP565260.1 | 0.597564255 | 9.47E-13 | IL1R1      | -1.041942965 | 1.96E-17  |
| RP9P       | 0.597265698 | 0.000512 | HIP1       | -1.042058635 | 1.28E-12  |
| SNHG16     | 0.5971842   | 1.71E-09 | AC100810.3 | -1.042138266 | 0.0030245 |
| PARVB      | 0.596943273 | 0.005913 | GPR37L1    | -1.043220505 | 1.36E-07  |
| AGAP3      | 0.595686128 | 9.66E-14 | BAIAP2-DT  | -1.04415111  | 7.07E-13  |
| MBTD1      | 0.595519871 | 7.02E-07 | BSN        | -1.044385577 | 0.009302  |
| LETM1      | 0.595301597 | 2.65E-11 | SELL       | -1.044654094 | 0.0092183 |
| ARL5A      | 0.595036511 | 6.84E-07 | C9orf152   | -1.045243903 | 5.09E-06  |
| ME1        | 0.594631439 | 8.59E-11 | PRKACB     | -1.045849018 | 8.70E-06  |
| RBM38      | 0.594283699 | 1.23E-11 | SPEF2      | -1.049065907 | 4.59E-05  |
| ETS2       | 0.594182938 | 8.95E-06 | B4GALT1    | -1.049742105 | 1.61E-15  |
| TSR1       | 0.594152248 | 4.80E-17 | LHX1       | -1.05027377  | 0.0001388 |
| ZNF692     | 0.59391395  | 2.28E-07 | CNIH2      | -1.050531085 | 0.0005067 |
| FEM1A      | 0.592642741 | 2.74E-05 | IQCN       | -1.051014609 | 0.0322729 |
| ALG5       | 0.592215056 | 4.76E-08 | FMNL1      | -1.051867422 | 1.79E-09  |
| MTURN      | 0.591828271 | 1.14E-05 | C1orf226   | -1.052398433 | 0.0061773 |
| CTC1       | 0.591412747 | 5.23E-09 | RIMS3      | -1.052624081 | 2.65E-15  |
| GRWD1      | 0.591345679 | 4.79E-13 | AMTN       | -1.053151659 | 0.000523  |
| MPST       | 0.591294826 | 1.43E-09 | ARHGDIB    | -1.053577036 | 0.0100562 |

|            |             |          |            |              |           |
|------------|-------------|----------|------------|--------------|-----------|
| DLAT       | 0.590930523 | 1.48E-12 | DIO2       | -1.054618768 | 0.0020212 |
| DGAT2      | 0.590651514 | 0.003249 | ZMAT1      | -1.056174906 | 0.0007464 |
| ZNF696     | 0.590383865 | 6.91E-13 | PIP5KL1    | -1.057792371 | 0.0098184 |
| C3orf33    | 0.590279663 | 0.000171 | SDC2       | -1.057826555 | 1.99E-09  |
| TXN        | 0.589917504 | 5.53E-10 | DUSP4      | -1.058984747 | 4.69E-47  |
| GPT2       | 0.589668154 | 1.15E-15 | CA12       | -1.05937714  | 0.0368233 |
| DDX39A     | 0.589574401 | 4.63E-21 | DMC1       | -1.060880246 | 0.0373942 |
| PHB2       | 0.58881731  | 6.44E-14 | ESR1       | -1.060986249 | 6.02E-23  |
| EIF3M      | 0.588311098 | 1.07E-12 | PLEKHA4    | -1.061755881 | 0.0180404 |
| DUS1L      | 0.588186917 | 1.64E-18 | AC098934.1 | -1.061882255 | 3.54E-06  |
| OSGIN1     | 0.588129041 | 4.51E-09 | ABLIM3     | -1.061994299 | 8.16E-16  |
| VDAC2      | 0.58786334  | 5.14E-14 | MCTP1      | -1.062656608 | 0.0039973 |
| AC093323.1 | 0.587840628 | 4.50E-07 | AMIGO3     | -1.062781113 | 0.0177516 |
| CYP1B1     | 0.587258861 | 7.10E-06 | LRRC75A    | -1.063057679 | 0.0002197 |
| VAR51      | 0.587099852 | 2.25E-14 | SLC16A4    | -1.063357658 | 0.0059086 |
| GPR155     | 0.587017807 | 0.041874 | AC139099.1 | -1.063664936 | 7.81E-05  |
| SSB        | 0.586815767 | 3.33E-11 | ABCC3      | -1.063695943 | 1.08E-19  |
| NXT1       | 0.586633497 | 1.30E-08 | MTMR11     | -1.06382291  | 2.42E-12  |
| CACYBP     | 0.586584339 | 5.66E-13 | AC244197.3 | -1.064338419 | 1.04E-06  |
| RPP38      | 0.586458116 | 7.14E-06 | REEP2      | -1.06507589  | 0.0006946 |
| UQCRH      | 0.586427481 | 1.33E-12 | ABCA7      | -1.06552685  | 1.32E-10  |
| PLA2G12A   | 0.585762084 | 5.99E-09 | NAV2       | -1.065695594 | 9.01E-30  |
| GPATCH4    | 0.585659356 | 4.82E-11 | AL031123.2 | -1.065894569 | 0.0014876 |
| KRI1       | 0.585546807 | 5.45E-10 | ITGB2      | -1.065976977 | 0.0079224 |
| TGFB1      | 0.585321851 | 1.06E-11 | FGF12      | -1.067427496 | 3.58E-05  |
| OGFRP1     | 0.584991427 | 1.39E-05 | SP6        | -1.067524872 | 0.0013946 |
| EEF1B2     | 0.58498141  | 3.86E-14 | MVP        | -1.068360135 | 2.75E-21  |
|            |             |          | MX1        | -1.068666971 | 0.0035294 |
|            |             |          | AC092821.4 | -1.068925477 | 0.0045974 |
|            |             |          | MYBL1      | -1.069350863 | 7.36E-06  |
|            |             |          | MEGF6      | -1.069586288 | 3.56E-24  |
|            |             |          | GGT6       | -1.070041266 | 4.23E-05  |
|            |             |          | TIMP2      | -1.070372531 | 4.35E-25  |
|            |             |          | APH1B      | -1.07045256  | 5.07E-07  |
|            |             |          | FAM114A1   | -1.071484662 | 5.06E-08  |
|            |             |          | CDKN2B     | -1.071694044 | 0.0011582 |
|            |             |          | AC015813.6 | -1.072798926 | 2.12E-17  |
|            |             |          | PLXDC2     | -1.074706255 | 4.57E-05  |
|            |             |          | AC096677.1 | -1.075028141 | 0.0046113 |
|            |             |          | TPO        | -1.075256569 | 0.0007732 |
|            |             |          | AL365181.2 | -1.07582689  | 4.61E-07  |
|            |             |          | ZBTB38     | -1.076167688 | 2.92E-09  |
|            |             |          | CES3       | -1.076240892 | 0.0010146 |
|            |             |          | ARNT2      | -1.077886795 | 2.43E-36  |
|            |             |          | AHRR_1     | -1.078441534 | 0.0024667 |
|            |             |          | IGF2BP1    | -1.081918104 | 0.0198702 |
|            |             |          | PLEKHH2    | -1.082584417 | 1.17E-05  |

|            |              |           |
|------------|--------------|-----------|
| APOBEC3F   | -1.084165378 | 0.0046201 |
| CLCF1      | -1.084582152 | 1.02E-05  |
| MALRD1     | -1.086326456 | 0.0062085 |
| AGAP11     | -1.086892224 | 8.28E-06  |
| CCDC96     | -1.088937634 | 0.0005606 |
| FHDC1      | -1.089108277 | 1.31E-11  |
| MAPK4      | -1.090309141 | 0.0006147 |
| STOX2      | -1.090340559 | 5.93E-05  |
| AL031123.3 | -1.09058119  | 0.0237322 |
| A4GALT     | -1.091683214 | 0.0029988 |
| SQOR       | -1.092066609 | 3.25E-13  |
| SUSD2      | -1.092384017 | 1.82E-06  |
| DAPK2      | -1.094846544 | 1.85E-09  |
| VGLL1      | -1.095085177 | 0.000567  |
| LPP-AS2    | -1.096427371 | 1.31E-05  |
| NRM        | -1.096657567 | 3.69E-07  |
| SOWAHB     | -1.097126298 | 9.22E-09  |
| CYP46A1    | -1.097745584 | 0.0012795 |
| SLC22A18AS | -1.097908585 | 0.0023414 |
| STON1      | -1.098955007 | 9.25E-07  |
| USP51      | -1.099228987 | 0.0010065 |
| KCND1      | -1.09939395  | 0.0004447 |
| LINC02321  | -1.101377771 | 0.0075574 |
| CELSR2     | -1.102470271 | 3.25E-06  |
| DLC1       | -1.103855505 | 2.58E-10  |
| LUM        | -1.105060825 | 1.94E-07  |
| FA2H       | -1.10851202  | 1.48E-05  |
| TMEM40     | -1.108516431 | 4.02E-07  |
| GPR132     | -1.108935861 | 0.0050039 |
| NHS        | -1.110016714 | 3.65E-20  |
| TMSB4X     | -1.110088157 | 6.52E-19  |
| TXNIP      | -1.110389615 | 4.08E-39  |
| SPEG       | -1.110657219 | 9.80E-08  |
| AMZ1       | -1.110975576 | 3.76E-09  |
| CBFA2T3    | -1.113051147 | 0.0021034 |
| EEPD1      | -1.11355592  | 0.0011589 |
| PRR36      | -1.113608938 | 0.0001438 |
| TTYH3      | -1.113709303 | 1.62E-17  |
| SLC34A3    | -1.114239915 | 0.0003899 |
| ITGB4      | -1.117105286 | 4.69E-46  |
| DDX60      | -1.119110062 | 1.09E-05  |
| SBK1       | -1.121205753 | 5.66E-09  |
| PALLD      | -1.121379289 | 2.12E-29  |
| LHX2       | -1.121671624 | 5.45E-05  |
| LAMB3      | -1.122224518 | 0.0003031 |
| ANXA3      | -1.122960837 | 9.40E-13  |
| MST1R      | -1.124188167 | 3.18E-06  |

|            |              |           |
|------------|--------------|-----------|
| IFI27L1    | -1.124815404 | 0.0007215 |
| SALL2      | -1.125785962 | 0.0226822 |
| SLITRK6    | -1.126285028 | 0.0005864 |
| AC007743.1 | -1.127913996 | 0.0062788 |
| AC093001.1 | -1.128113527 | 3.02E-21  |
| ZFHx2      | -1.128641887 | 0.0001018 |
| C4orf19    | -1.129703441 | 1.80E-11  |
| AC027601.1 | -1.131137977 | 0.000567  |
| PIM1       | -1.131203489 | 2.07E-06  |
| SLC1A4     | -1.132068625 | 6.23E-12  |
| SLC16A2    | -1.133064212 | 0.0002216 |
| THBS1      | -1.133631192 | 8.38E-20  |
| FER1L4     | -1.13401301  | 5.14E-18  |
| FAM47E-    |              |           |
| STBD1      | -1.134324424 | 2.25E-05  |
| DDAH2      | -1.134498913 | 0.0052406 |
| CISH       | -1.135093332 | 0.0422715 |
| AC040970.1 | -1.137260911 | 0.0003736 |
| TNFAIP8L1  | -1.137297222 | 4.70E-06  |
| MAFF       | -1.138209152 | 1.33E-05  |
| ANOS1      | -1.138597237 | 8.12E-05  |
| ADGRF4     | -1.138904017 | 7.45E-05  |
| MYO15B     | -1.141172055 | 1.86E-13  |
| IRF7       | -1.141810678 | 3.79E-09  |
| FRAS1      | -1.142038379 | 0.0002551 |
| TCHH       | -1.142153177 | 0.0001336 |
| GALC       | -1.145917556 | 1.10E-06  |
| GSTM2      | -1.14872767  | 0.0141674 |
| FGD3       | -1.150631025 | 2.35E-18  |
| DUSP10     | -1.151074582 | 0.0001526 |
| KIAA1210   | -1.153699295 | 0.0009056 |
| ZNF396     | -1.154498733 | 0.0004553 |
| CEMIP      | -1.155100732 | 2.82E-10  |
| GPX8       | -1.155421918 | 2.61E-12  |
| ANKRD6     | -1.159799482 | 0.0041901 |
| CLIP2      | -1.159908236 | 6.70E-08  |
| TTLL7      | -1.160790217 | 3.13E-06  |
| PPP1R18    | -1.161090414 | 3.09E-14  |
| ADGRG6     | -1.164403615 | 3.27E-47  |
| LMO7       | -1.164599655 | 1.49E-43  |
| CTSV       | -1.164775597 | 4.66E-06  |
| CDKL5      | -1.165661593 | 4.10E-10  |
| MAFB       | -1.169211766 | 0.0001881 |
| PXDC1      | -1.169629839 | 0.0004005 |
| MYO16      | -1.171503362 | 0.0033989 |
| MUC3A      | -1.175267863 | 0.0009307 |
| FBXO48     | -1.175781863 | 0.001104  |

|            |              |           |
|------------|--------------|-----------|
| LINC02620  | -1.175880012 | 0.0373771 |
| PLEKHG1    | -1.176644335 | 0.0004664 |
| OPHN1      | -1.177583275 | 1.17E-07  |
| MAOA       | -1.17883456  | 7.72E-10  |
| ADGRA2     | -1.179667588 | 0.0002951 |
| RPS6KA2    | -1.179820605 | 2.81E-10  |
| PEG10      | -1.183213413 | 4.41E-09  |
| AMOTL2     | -1.18341318  | 8.03E-31  |
| GPRC5A     | -1.1845458   | 1.71E-31  |
| SYTL2      | -1.184936965 | 3.24E-51  |
| AC015802.6 | -1.187167831 | 1.45E-05  |
| ETNK2      | -1.188296001 | 9.29E-08  |
| HEYL       | -1.189175791 | 5.37E-06  |
| APAF1      | -1.189594736 | 2.23E-13  |
| STEAP4     | -1.190813336 | 6.25E-07  |
| LGALS1     | -1.191976227 | 6.23E-19  |
| MAB21L4    | -1.192817004 | 6.56E-11  |
| INPP5J     | -1.19304953  | 3.66E-07  |
| THSD4      | -1.19324444  | 1.97E-21  |
| SEMA3C     | -1.193470102 | 1.04E-19  |
| MYLK       | -1.193767012 | 1.09E-05  |
| RIBC2      | -1.19555008  | 9.57E-07  |
| LYPD6      | -1.198024121 | 4.51E-09  |
| CLIC3      | -1.199036184 | 6.50E-17  |
| GPR173     | -1.199233233 | 3.95E-05  |
| CCDC103    | -1.199472463 | 0.0048922 |
| EGFR       | -1.200558333 | 1.12E-11  |
| ITGB6      | -1.200916622 | 2.03E-29  |
| CRISPLD2   | -1.201705215 | 4.03E-06  |
| FMN1       | -1.203698039 | 1.73E-10  |
| TUBA1A     | -1.203947475 | 1.65E-16  |
| AC079414.2 | -1.206283737 | 0.0007247 |
| ZNF792     | -1.207162305 | 0.0001852 |
| SYTL4      | -1.208867737 | 2.97E-08  |
| IQGAP3     | -1.209998343 | 2.59E-18  |
| OAS3       | -1.210569549 | 1.27E-20  |
| SPSB4      | -1.211731314 | 0.0022813 |
| DCDC2      | -1.211873342 | 0.0004202 |
| AL109918.1 | -1.215181288 | 1.23E-05  |
| CORO1A     | -1.215928529 | 5.14E-06  |
| RET        | -1.216872982 | 0.0290891 |
| ZNF836     | -1.217010791 | 0.0018655 |
| PALM2AKAP2 | -1.221358201 | 0.0007292 |
| ACACB      | -1.221668606 | 3.13E-05  |
| C2CD4C     | -1.222024245 | 8.88E-05  |
| CENPI      | -1.222407046 | 6.23E-12  |
| AC080112.4 | -1.229252785 | 0.0037451 |

|            |              |           |
|------------|--------------|-----------|
| BTBD8      | -1.229635955 | 0.0005727 |
| KLK6       | -1.231758376 | 0.001082  |
| PGM5       | -1.23272551  | 3.00E-06  |
| PRKG1      | -1.235619935 | 0.0106166 |
| SYNE1      | -1.236933285 | 4.54E-06  |
| EFR3B      | -1.237662425 | 1.02E-05  |
| SPOCK2     | -1.237996281 | 0.0066552 |
| PLEKHG2    | -1.238648875 | 8.38E-17  |
| ERP27      | -1.239516642 | 3.36E-07  |
| S100A9     | -1.246885963 | 1.17E-05  |
| RTKN2      | -1.247708599 | 1.06E-13  |
| CLDN1      | -1.250046706 | 3.85E-15  |
| ATP2B4     | -1.252655218 | 3.96E-06  |
| CACNG4     | -1.254050852 | 5.00E-22  |
| FAM122C    | -1.256348598 | 3.07E-08  |
| MKRN2OS    | -1.260264281 | 0.0007572 |
| LINC02732  | -1.263288988 | 3.38E-15  |
| C5         | -1.264116509 | 1.29E-12  |
| LHFPL6     | -1.265162873 | 5.44E-17  |
| PTGR1      | -1.26631109  | 0.000327  |
| KLF6       | -1.267158518 | 9.67E-18  |
| RASGRP1    | -1.273390684 | 3.35E-07  |
| MALL       | -1.278804473 | 3.78E-28  |
| CSRP2      | -1.27924869  | 0.0005886 |
| RIMBP3     | -1.282724192 | 0.0044134 |
| SH3PXD2A   | -1.283020466 | 0.0004075 |
| PTPRG-AS1  | -1.284319464 | 1.76E-11  |
| LYN        | -1.287137654 | 0.0002217 |
| CAPN5      | -1.288851221 | 7.29E-19  |
| EDIL3      | -1.288889212 | 3.32E-05  |
| CAV1       | -1.298254692 | 1.08E-25  |
| FAM167A    | -1.299639126 | 2.46E-05  |
| TLCD2      | -1.301134208 | 3.46E-13  |
| CCDC88B    | -1.301678204 | 0.0011255 |
| PTAFR      | -1.30181785  | 0.0001266 |
| COL5A1     | -1.302979657 | 7.64E-18  |
| COL12A1    | -1.304038497 | 1.04E-19  |
| GCOM1      | -1.30419098  | 8.36E-05  |
| AC012513.3 | -1.306983133 | 1.30E-05  |
| PDK4       | -1.307588307 | 0.0001563 |
| ESAM       | -1.311099843 | 4.37E-06  |
| ARRDC3     | -1.311616331 | 1.40E-06  |
| LRRC15     | -1.315017358 | 9.26E-07  |
| AC010735.2 | -1.316869893 | 0.0010006 |
| PRICKLE2   | -1.31750117  | 4.86E-08  |
| FRK        | -1.324435972 | 3.42E-06  |
| ABCA4      | -1.326880958 | 0.0118682 |

|            |              |           |
|------------|--------------|-----------|
| MID1       | -1.330743294 | 6.48E-33  |
| TOX2       | -1.331454678 | 4.30E-05  |
| NEDD9      | -1.333553933 | 4.18E-07  |
| RAP2C-AS1  | -1.337921091 | 0.0014534 |
| PCLO       | -1.339273851 | 8.67E-14  |
| MEIS3      | -1.34668861  | 4.83E-15  |
| EFEMP1     | -1.347792425 | 3.03E-13  |
| LYPD3      | -1.34851276  | 1.71E-16  |
| EPHA4      | -1.348884428 | 3.42E-22  |
| PRLR       | -1.351292457 | 7.56E-15  |
| KLF7       | -1.351734982 | 4.33E-05  |
| NFATC2     | -1.357170566 | 3.14E-17  |
| SERPINA1   | -1.36042563  | 0.0003843 |
| AC121757.2 | -1.362353677 | 0.0014876 |
| HSPB8      | -1.363391621 | 0.0080537 |
| MAP1A      | -1.366699321 | 0.0013502 |
| FREM2      | -1.367801809 | 3.42E-19  |
| STRIP2     | -1.370945358 | 0.000384  |
| WNT9A      | -1.371173662 | 0.0001794 |
| ULBP1      | -1.372404132 | 6.38E-08  |
| SCARA3     | -1.375180368 | 1.21E-14  |
| ZNF185     | -1.376944408 | 7.80E-44  |
| MATN3      | -1.37743638  | 3.19E-11  |
| TGM1       | -1.381397824 | 2.47E-15  |
| TMEM47     | -1.381525257 | 0.0005805 |
| INPP4B     | -1.382192743 | 2.14E-27  |
| BANK1      | -1.383860116 | 8.57E-06  |
| PAPSS2     | -1.385994798 | 4.39E-38  |
| AL157935.2 | -1.387071813 | 0.0006359 |
| TRIM2      | -1.39088128  | 2.08E-06  |
| AC110619.1 | -1.392054106 | 1.47E-30  |
| ARHGAP33   | -1.396428518 | 2.19E-12  |
| FAM155A    | -1.403543405 | 1.23E-10  |
| MRAS       | -1.407566231 | 9.09E-06  |
| ST6GALNAC2 | -1.4184371   | 2.29E-14  |
| AL732372.1 | -1.419449317 | 3.90E-08  |
| UBA7       | -1.428273984 | 1.67E-08  |
| AC144831.1 | -1.428532717 | 1.39E-06  |
| PHLDB2     | -1.432163784 | 8.49E-06  |
| LAMC2      | -1.438238035 | 3.82E-24  |
| RIPOR3     | -1.438761807 | 8.66E-16  |
| AC022034.1 | -1.439845731 | 1.55E-09  |
| SAMD9      | -1.443182628 | 1.98E-08  |
| SPOCK1     | -1.445448209 | 2.05E-13  |
| FN1        | -1.447996957 | 2.46E-29  |
| AFAP1L2    | -1.451571186 | 2.80E-06  |
| CMYA5      | -1.456388452 | 2.95E-19  |

|            |              |           |
|------------|--------------|-----------|
| FAT4       | -1.45969351  | 1.01E-09  |
| SLFN5      | -1.460018489 | 6.26E-15  |
| ACHE       | -1.468918718 | 0.0129768 |
| MAGED4B    | -1.471500191 | 5.07E-07  |
| LINC01213  | -1.476513236 | 0.0011895 |
| LINC00514  | -1.477809233 | 2.38E-05  |
| SCN8A      | -1.504828688 | 1.66E-07  |
| DNAJB5     | -1.507789507 | 3.87E-09  |
| LRRC46     | -1.511248933 | 1.29E-06  |
| UGT1A6     | -1.51657415  | 2.91E-08  |
| CLIP4      | -1.525497977 | 2.90E-05  |
| DKK1       | -1.533439215 | 2.18E-25  |
| TCIM       | -1.534584571 | 2.09E-13  |
| TENT5B     | -1.548757542 | 3.30E-05  |
| LIN7A      | -1.553234322 | 3.54E-13  |
| PRSS23     | -1.576228826 | 0.0017715 |
| SEMA3B     | -1.59353442  | 0.0002001 |
| TNFRSF11B  | -1.60089026  | 3.65E-08  |
| ABAT       | -1.601198193 | 4.95E-10  |
| HRH2       | -1.603049002 | 4.91E-05  |
| AL158211.5 | -1.605155207 | 5.21E-05  |
| TNS1       | -1.606276241 | 1.97E-08  |
| SYTL5      | -1.611897144 | 0.0028675 |
| AC131649.2 | -1.616861543 | 1.71E-08  |
| NEURL1B    | -1.617289529 | 2.14E-17  |
| CYP26B1    | -1.621818248 | 2.01E-06  |
| LINC00365  | -1.622308347 | 7.19E-05  |
| CGNL1      | -1.637984036 | 2.56E-08  |
| JPH2       | -1.645609675 | 7.60E-09  |
| CMPK2      | -1.64637252  | 3.46E-05  |
| MYPN       | -1.652377022 | 4.61E-22  |
| NRCAM      | -1.670340979 | 1.71E-25  |
| PLXNA2     | -1.682577561 | 6.97E-16  |
| PAOX       | -1.691481159 | 1.87E-06  |
| SERPINA3   | -1.692498893 | 5.78E-07  |
| LINC02747  | -1.69682187  | 1.24E-10  |
| APOL6      | -1.706216815 | 6.00E-18  |
| APOBEC3B   | -1.737546365 | 6.12E-13  |
| MAP2       | -1.74476769  | 2.08E-14  |
| PCDHAC2    | -1.76459825  | 4.53E-14  |
| ABCC13     | -1.792301823 | 0.0001054 |
| PSG5       | -1.798457024 | 4.54E-06  |
| DHRS2      | -1.806317385 | 2.22E-08  |
| INHBA      | -1.829807877 | 3.80E-18  |
| AL354740.1 | -1.84221277  | 3.52E-08  |
| SLCO2A1    | -1.853260427 | 9.76E-10  |
| TGFB2      | -1.860669311 | 2.17E-17  |



|  |            |              |           |
|--|------------|--------------|-----------|
|  | SNAI2      | -1.894166773 | 2.66E-06  |
|  | PSG9       | -1.913367873 | 2.04E-05  |
|  | NT5E       | -1.94169842  | 1.03E-35  |
|  | MIR503HG   | -1.969192754 | 3.11E-15  |
|  | AL590004.3 | -2.005858889 | 1.11E-16  |
|  | HMCN1      | -2.028877911 | 4.52E-07  |
|  | SLIT2      | -2.036898066 | 1.22E-10  |
|  | NECAB1     | -2.193808119 | 0.0007335 |

**Table S7:** mRNAs significantly up- or downregulated ( $\geq 1.5$ x fold change) in MCF-7/pRTR-c-MYC cells (*AP4* wild-type/*p53* -/-).

| Significantly up-regulated mRNAs |                              |           | Significantly down-regulated mRNAs |                              |             |
|----------------------------------|------------------------------|-----------|------------------------------------|------------------------------|-------------|
| Gene symbol                      | Log <sub>2</sub> Fold Change | padj      | Gene symbol                        | Log <sub>2</sub> Fold Change | padj        |
| AC026786.1                       | 4.168743284                  | 1.60E-51  | MR1                                | -0.585044157                 | 1.34E-07    |
| MYC                              | 3.903295402                  | 0         | TFPI                               | -0.58520387                  | 8.18E-16    |
| PDE4A                            | 3.001954731                  | 1.49E-52  | RABAC1                             | -0.585262689                 | 6.60E-11    |
| GAL                              | 2.756563751                  | 1.17E-187 | KIFAP3                             | -0.585284581                 | 0.000472111 |
| USP2-AS1                         | 2.745916792                  | 2.34E-29  | ATP6V0A4                           | -0.585721812                 | 6.63E-09    |
| FABP5                            | 2.724558312                  | 1.20E-265 | FUT4                               | -0.585882024                 | 0.002397269 |
| CR2                              | 2.338092286                  | 3.71E-12  | TTC39A                             | -0.585887917                 | 2.66E-12    |
| KCNQ4                            | 2.185403978                  | 3.15E-20  | POLR3GL                            | -0.585953519                 | 2.10E-07    |
| DUSP2                            | 2.136294355                  | 1.63E-45  | RHOBTB2                            | -0.58624241                  | 1.88E-13    |
| POLR3G                           | 2.091549742                  | 1.32E-125 | EMP2                               | -0.586464975                 | 1.89E-20    |
| LRFN1                            | 1.899460333                  | 8.76E-24  | SEN7                               | -0.586645492                 | 4.78E-08    |
| WNT10B                           | 1.863022183                  | 7.92E-39  | GLMP                               | -0.586852439                 | 9.38E-09    |
| PLD6                             | 1.858176844                  | 8.99E-64  | PRSS27                             | -0.587725767                 | 0.048251373 |
| ADGRE2                           | 1.857540829                  | 8.04E-10  | RORA                               | -0.588366593                 | 0.031748198 |
| RAB3IL1                          | 1.794692082                  | 4.70E-43  | C2orf72                            | -0.58863795                  | 0.010419683 |
| SLC16A1                          | 1.791770196                  | 1.15E-212 | EVI5L                              | -0.588716547                 | 8.34E-12    |
| NPTX1                            | 1.784690357                  | 6.08E-08  | GPR158                             | -0.589054098                 | 0.012884772 |
| TBC1D4                           | 1.751374829                  | 4.41E-77  | MAN1A1                             | -0.589188988                 | 2.03E-07    |
| CPNE7                            | 1.744356869                  | 3.52E-16  | TMEM87B                            | -0.589268102                 | 8.11E-14    |
| MATK                             | 1.738545515                  | 4.85E-86  | ERMARD                             | -0.589515099                 | 1.21E-06    |
| PCOLCE2                          | 1.720706642                  | 1.32E-37  | SSH3                               | -0.589951119                 | 2.45E-17    |
| PPARGC1B                         | 1.705575216                  | 8.12E-31  | MEGF8                              | -0.590484584                 | 2.78E-11    |
| TMEM52                           | 1.683241341                  | 3.78E-09  | MT1X                               | -0.59056572                  | 0.047671617 |
| EN2                              | 1.625584562                  | 3.94E-54  | FZD2                               | -0.590828125                 | 7.83E-06    |
| SORD                             | 1.621020622                  | 9.78E-122 | INSR                               | -0.591322886                 | 4.86E-06    |
| HOXC8                            | 1.547256336                  | 1.42E-05  | LFNG                               | -0.591488612                 | 8.43E-08    |
| HRK                              | 1.54488201                   | 1.64E-05  | TRIM34                             | -0.591855078                 | 0.005426254 |
| TERT                             | 1.54118703                   | 3.66E-08  | TECPR1                             | -0.59196299                  | 9.41E-08    |
| RAB3A                            | 1.537641498                  | 2.26E-22  | BHLHB9                             | -0.592233054                 | 0.018931373 |
| PAQR5                            | 1.534887099                  | 1.80E-07  | TMCO3                              | -0.592514557                 | 1.45E-13    |
| EMSLR                            | 1.532995273                  | 3.11E-80  | IRF5                               | -0.593687122                 | 0.000164952 |
| TAF4B                            | 1.522432721                  | 1.66E-67  | MINDY1                             | -0.594131369                 | 1.07E-06    |
| RPP25                            | 1.481613063                  | 5.44E-61  | B3GNT3                             | -0.594135034                 | 1.34E-08    |
| DLX2                             | 1.464265311                  | 2.35E-06  | IRF2BPL                            | -0.594567063                 | 4.76E-23    |
| KCTD12                           | 1.461378578                  | 6.91E-27  | LINC00888                          | -0.59531163                  | 0.001924064 |
| SLC29A1                          | 1.459293514                  | 1.07E-111 | ZKSCAN3                            | -0.595433244                 | 0.009979342 |
| AC040162.1                       | 1.437841716                  | 1.08E-18  | VPS35L                             | -0.595754392                 | 4.77E-10    |
| RNF125                           | 1.428496731                  | 1.64E-16  | PLEKHA2                            | -0.595764009                 | 1.01E-06    |
| AMER1                            | 1.409844045                  | 1.95E-42  | AL049834.1                         | -0.596016008                 | 0.005149988 |
| CENPV                            | 1.406190586                  | 1.12E-23  | TRPS1                              | -0.596223352                 | 2.86E-17    |
| FJX1                             | 1.402221192                  | 1.85E-44  | FAM161B                            | -0.596930945                 | 0.001086243 |
| LYAR                             | 1.401034028                  | 5.08E-93  | TMEM219                            | -0.597125137                 | 4.17E-10    |

|            |             |             |            |              |             |
|------------|-------------|-------------|------------|--------------|-------------|
| HPDL       | 1.395315807 | 3.14E-70    | AKAP5      | -0.597976948 | 0.036577878 |
| MAP3K21    | 1.389916636 | 7.90E-28    | RHBDF1     | -0.598328191 | 3.61E-22    |
| ACTL8      | 1.388052051 | 3.47E-06    | MIEF2      | -0.598465121 | 8.46E-08    |
| CDC42EP1   | 1.387989629 | 1.94E-84    | MREG       | -0.598618331 | 0.001976676 |
| HS3ST3B1   | 1.370410811 | 9.47E-09    | HLA-C      | -0.598879153 | 2.96E-23    |
| CARMIL2    | 1.342906197 | 1.40E-10    | OR2A9P     | -0.599017282 | 0.043273894 |
| ADAT2      | 1.326172319 | 3.53E-37    | MIDN       | -0.599036258 | 1.44E-17    |
| GFOD1      | 1.308494275 | 1.97E-27    | EGR1       | -0.599069163 | 0.004744943 |
| SLC19A3    | 1.291542102 | 0.000137158 | ZFHX2      | -0.599604127 | 0.043193141 |
| PPIF       | 1.281441935 | 2.36E-97    | EGFR       | -0.5999695   | 2.22E-05    |
| RRP9       | 1.280738481 | 8.99E-64    | PRSS16     | -0.600229677 | 0.012771903 |
| ANKRD13B   | 1.278552645 | 2.81E-37    | CRYL1      | -0.600438388 | 1.77E-07    |
| ARID5A     | 1.273774072 | 4.79E-15    | CAPG       | -0.600442204 | 5.31E-19    |
| PODXL2     | 1.266758468 | 6.68E-47    | ZNF287     | -0.600656364 | 0.001359099 |
| SLC25A19   | 1.260927197 | 1.67E-47    | AC016747.1 | -0.601166817 | 0.001230974 |
| AC007342.4 | 1.258360566 | 0.000730911 | CDKL5      | -0.601420352 | 0.001408544 |
| JPH1       | 1.258113821 | 3.03E-29    | MXD4       | -0.601548984 | 9.26E-19    |
| PFKM       | 1.25562162  | 1.31E-90    | SLITRK6    | -0.601639081 | 0.004625962 |
| MPP6       | 1.246682766 | 2.85E-47    | MATN2      | -0.601824268 | 1.54E-06    |
| NPM3       | 1.24593111  | 4.27E-87    | AC026748.3 | -0.60233853  | 0.001066852 |
| NRARP      | 1.230978078 | 5.62E-77    | GHDC       | -0.602405728 | 6.22E-07    |
| SLC27A5    | 1.22648696  | 3.48E-17    | ZNF606     | -0.603389387 | 0.01607702  |
| NFE2L3     | 1.220789336 | 7.82E-22    | ZNF737     | -0.603581542 | 0.007069973 |
| GEMIN5     | 1.217565663 | 3.11E-70    | CDC25C     | -0.603688729 | 2.62E-05    |
| GPRC5B     | 1.210266495 | 2.95E-05    | WIP1       | -0.60393687  | 1.33E-11    |
| JAG2       | 1.210104722 | 2.15E-47    | TMEM107    | -0.604107229 | 0.000838196 |
| TWNK       | 1.208697354 | 6.60E-72    | FADS3      | -0.604359784 | 2.64E-10    |
| PITX1      | 1.206161534 | 1.71E-40    | DSCAM      | -0.604372694 | 0.000177436 |
| MXI1       | 1.204172477 | 5.94E-53    | PACSIN1    | -0.604918372 | 1.21E-09    |
| ABCC4      | 1.196223303 | 1.07E-32    | TMPRSS13   | -0.604959939 | 3.41E-08    |
| RGS16      | 1.196139256 | 2.82E-28    | PLAAT3     | -0.605008193 | 1.50E-08    |
| DUSP9      | 1.195538598 | 4.54E-05    | OLFM1      | -0.605090653 | 7.24E-11    |
| LRP4       | 1.191184302 | 2.88E-06    | CD59       | -0.605447406 | 3.79E-23    |
| FAM81A     | 1.178296339 | 1.31E-12    | GABARAPL1  | -0.605702697 | 0.043496794 |
| NAT8L      | 1.177162139 | 4.29E-34    | DOCK11     | -0.606166035 | 2.44E-07    |
| KLHL31     | 1.176125873 | 0.009580722 | SHFL       | -0.606468367 | 4.16E-06    |
| MIR17HG    | 1.175548265 | 0.002610658 | ZNF333     | -0.607038428 | 0.016474662 |
| SACS       | 1.168582882 | 1.20E-39    | TOM1L2     | -0.607103538 | 8.41E-12    |
| SNAI1      | 1.168225541 | 0.000145496 | ZBTB22     | -0.607450752 | 1.57E-09    |
| FAM216A    | 1.160159107 | 6.94E-14    | FHL2       | -0.60748465  | 4.20E-08    |
| FAM89A     | 1.157729288 | 4.64E-10    | LMNTD2     | -0.607648066 | 0.02324875  |
| PALD1      | 1.156654877 | 4.73E-05    | PGAP3      | -0.607785513 | 7.19E-05    |
| GALNT18    | 1.152843041 | 1.33E-43    | CAPRIN2    | -0.608227945 | 0.010990887 |
| GALNT14    | 1.152730767 | 3.02E-24    | TAPBPL     | -0.608352584 | 2.84E-05    |
| NOP16      | 1.151147592 | 6.26E-98    | THBS3      | -0.608793857 | 1.18E-08    |
| CHCHD4     | 1.14372346  | 7.21E-57    | ACER2      | -0.608817614 | 0.045190394 |
| IL10RB-DT  | 1.143640996 | 0.006601152 | SFR1       | -0.609851069 | 0.004273291 |

|            |             |             |            |              |             |
|------------|-------------|-------------|------------|--------------|-------------|
| NR1D1      | 1.142948435 | 2.76E-12    | ERV3-1     | -0.610709936 | 3.07E-06    |
| YRDC       | 1.139111698 | 9.16E-28    | ARID5B     | -0.610844713 | 4.08E-12    |
| AC009831.1 | 1.138558853 | 0.000570686 | BICDL2     | -0.611013123 | 3.39E-15    |
| BEND3      | 1.137910206 | 2.21E-25    | TP53TG1    | -0.611131074 | 1.84E-05    |
| SLCO4A1    | 1.135432641 | 2.72E-33    | MELTF      | -0.611339624 | 1.67E-10    |
| PNP        | 1.133570925 | 1.91E-62    | AL162458.1 | -0.611655716 | 5.76E-05    |
| RPIA       | 1.132057549 | 1.94E-66    | GOLT1A     | -0.611807852 | 0.00245137  |
| CCDC86     | 1.128193087 | 1.02E-86    | ACOT4      | -0.612085298 | 0.021285016 |
| FAM131C    | 1.127678412 | 8.63E-05    | CRIP2      | -0.612467082 | 2.98E-28    |
| AC106820.4 | 1.12101298  | 0.007184018 | BAIAP3     | -0.612853671 | 0.001117946 |
| METTL8     | 1.120634306 | 4.40E-47    | RAB5B      | -0.612986407 | 4.57E-21    |
| RNF145     | 1.114117236 | 1.16E-08    | TSPAN9     | -0.613012092 | 3.60E-08    |
| ZNF296     | 1.114041546 | 1.50E-15    | PTPRG-AS1  | -0.613103915 | 1.03E-05    |
| BTN3A2     | 1.11393867  | 0.001814134 | RAB8B      | -0.613119244 | 1.67E-06    |
| AC146944.3 | 1.106956496 | 0.000122779 | COL11A2    | -0.61365434  | 4.06E-05    |
| SNHG30     | 1.10182859  | 3.82E-16    | SYT12      | -0.614617422 | 1.38E-19    |
| AEN        | 1.101204624 | 4.84E-48    | TRIM45     | -0.614660121 | 3.48E-10    |
| FERMT1     | 1.098118093 | 9.85E-10    | AL031777.2 | -0.614811161 | 0.023802977 |
| MLKL       | 1.097584124 | 3.74E-42    | MICALL2    | -0.615207532 | 1.97E-14    |
| BAG2       | 1.09688704  | 3.28E-18    | SAMD15     | -0.61536236  | 0.000907885 |
| LOXL3      | 1.094441204 | 3.35E-12    | COL4A5     | -0.615397758 | 3.59E-05    |
| DBF4P1     | 1.092911211 | 0.003237982 | SLX4       | -0.615898149 | 4.06E-10    |
| SMKR1      | 1.092743136 | 5.04E-22    | GPR37L1    | -0.616054573 | 0.000184434 |
| CD3EAP     | 1.091162071 | 5.22E-61    | ZFP36L2    | -0.616456344 | 3.38E-44    |
| DNAJC2     | 1.090362486 | 6.77E-89    | FAM43A     | -0.616503722 | 0.005666298 |
| EEF1AKMT4  | 1.081558871 | 6.07E-44    | AMOTL1     | -0.617065443 | 1.88E-18    |
| MON1A      | 1.081314928 | 5.00E-24    | TRIOBP     | -0.617372635 | 3.79E-16    |
| RABEPK     | 1.080057391 | 1.01E-46    | PNPLA7     | -0.617505484 | 0.006791136 |
| PSMG1      | 1.079562019 | 1.86E-57    | TNFAIP8    | -0.617959571 | 4.56E-06    |
| EPOP       | 1.079112399 | 1.47E-54    | PRR15L     | -0.61806454  | 2.50E-10    |
| NDUFAF4    | 1.078433652 | 4.79E-33    | NAGK       | -0.618324885 | 1.91E-16    |
| CAMKK1     | 1.077802743 | 3.79E-07    | EFNB3      | -0.619842237 | 0.001107915 |
| DPH2       | 1.075255563 | 2.77E-60    | EFEMP1     | -0.62037173  | 6.49E-11    |
| LDLRAD3    | 1.068563865 | 2.57E-20    | ALDH4A1    | -0.620468803 | 1.01E-17    |
| LYSMD2     | 1.064817872 | 7.98E-28    | KLC3       | -0.620656276 | 0.020743313 |
| AC012510.1 | 1.06466799  | 0.008234892 | SPRY4      | -0.621172854 | 0.043477491 |
| AC006111.2 | 1.06242595  | 4.43E-05    | DNASE1L1   | -0.621906895 | 3.70E-14    |
| NLN        | 1.061487359 | 6.04E-64    | PLIN3      | -0.622186652 | 3.04E-16    |
| SLC25A32   | 1.054916767 | 9.36E-46    | TRPT1      | -0.622865627 | 1.37E-09    |
| RPUSD1     | 1.048547124 | 1.81E-63    | CTDSP2     | -0.62291706  | 2.22E-19    |
| DNAH17-AS1 | 1.047099487 | 0.001777912 | PRSS8      | -0.623065386 | 9.33E-16    |
| WDR3       | 1.046118453 | 1.65E-78    | BBOF1      | -0.623169815 | 0.000205469 |
| CDIP1      | 1.041764984 | 0.004450896 | DENND3     | -0.623296923 | 1.88E-05    |
| RRP1B      | 1.037989811 | 9.81E-66    | TMEM256    | -0.623541165 | 4.02E-05    |
| L3HYPDH    | 1.035925757 | 7.33E-21    | ABHD2      | -0.623608196 | 5.77E-15    |
| NDUFAF2    | 1.033695268 | 6.28E-38    | SYNGR3     | -0.623797927 | 0.000249545 |
| AL161756.1 | 1.03291938  | 0.005364383 | LINC00365  | -0.623903278 | 0.001026369 |

|             |             |             |              |              |             |
|-------------|-------------|-------------|--------------|--------------|-------------|
| DDX21       | 1.030082276 | 1.87E-105   | POC1B-GALNT4 | -0.624115714 | 0.049128784 |
| GBX2        | 1.027567816 | 0.000528841 | ITGA3        | -0.624183119 | 4.81E-25    |
| SFXN4       | 1.027359964 | 1.79E-37    | IL17RE       | -0.624791635 | 0.012561153 |
| GRPEL1      | 1.024983938 | 3.30E-56    | AL359258.2   | -0.625051251 | 0.025697343 |
| ADAMTS17    | 1.024658758 | 0.000240665 | NRSN2        | -0.625255585 | 0.032425041 |
| WDR43       | 1.022096705 | 7.19E-81    | TMEM191B     | -0.62540433  | 0.043013981 |
| CACHD1      | 1.021388418 | 0.001968313 | AC027601.1   | -0.62541398  | 0.019695035 |
| DDX10       | 1.021167503 | 5.36E-44    | AC092718.3   | -0.625527554 | 0.015476564 |
| UTP20       | 1.020278332 | 3.88E-38    | TSPAN5       | -0.625593875 | 0.013597851 |
| AC103706.1  | 1.016098304 | 0.00651578  | SEZ6L2       | -0.627270663 | 2.49E-25    |
| CRYM-AS1    | 1.014011259 | 0.008001121 | TCTN2        | -0.627301295 | 2.27E-07    |
| TXLNG       | 1.00713091  | 2.97E-51    | PTK2B        | -0.627502882 | 0.001343659 |
| REXO4       | 1.007009327 | 3.48E-65    | PPARA        | -0.6275209   | 0.032528897 |
| ANP32A      | 1.006670083 | 3.30E-56    | PCDHGB5      | -0.627580834 | 7.66E-06    |
| SLC25A33    | 1.006056711 | 4.04E-37    | PYCARD       | -0.627891871 | 3.39E-14    |
| AL445423.3  | 1.005221119 | 0.001324991 | KIAA1211L    | -0.628061917 | 2.07E-11    |
| ASB13       | 1.003595484 | 1.70E-25    | S100A16      | -0.628115916 | 5.54E-29    |
| ZNF239      | 1.000685201 | 2.01E-11    | CLTCL1       | -0.628122158 | 0.000770816 |
| NANOS1      | 1.0000073   | 1.06E-08    | FAM102A      | -0.628180511 | 4.82E-15    |
| AP006333.1  | 0.99982688  | 0.000648592 | LPP-AS2      | -0.628228225 | 0.012937665 |
| COQ8A       | 0.99923375  | 4.76E-33    | LINC01232    | -0.628406535 | 0.032133886 |
| SINHCAF     | 0.998277536 | 2.99E-52    | CCDC24       | -0.628698102 | 0.000170481 |
| EIF2B3      | 0.997774284 | 1.79E-25    | NUCB2        | -0.629446729 | 2.95E-13    |
| TRMT61A     | 0.997697153 | 1.20E-44    | DNAJB2       | -0.62950241  | 5.71E-15    |
| KLHL21      | 0.993411544 | 4.72E-29    | IFI27L2      | -0.630010993 | 2.46E-05    |
| NOLC1       | 0.990694894 | 8.38E-95    | TMEM79       | -0.630337473 | 6.69E-10    |
| E2F5        | 0.987890173 | 3.20E-25    | ACSS2        | -0.631055236 | 2.26E-12    |
| ICAM5       | 0.987533939 | 9.39E-05    | RPS10P7      | -0.631340892 | 0.013253396 |
| CHN1        | 0.986571817 | 2.81E-21    | PIM1         | -0.631474037 | 0.000433134 |
| HMGA1       | 0.986043938 | 1.65E-74    | PRSS22       | -0.632148648 | 4.62E-10    |
| RRP1        | 0.985842642 | 1.95E-56    | NFATC4       | -0.632217332 | 0.011612319 |
| PDCD2L      | 0.984478555 | 4.44E-24    | AGRN         | -0.632448679 | 6.37E-19    |
| UCK2        | 0.98441605  | 7.61E-56    | ZNF446       | -0.632834882 | 0.001037485 |
| HHEX        | 0.982054448 | 0.00047084  | FARP1        | -0.633032655 | 1.56E-14    |
| SCML2       | 0.981400413 | 9.86E-09    | AC244197.3   | -0.633348114 | 0.001242208 |
| TCOF1       | 0.980906815 | 1.39E-67    | MAN2B2       | -0.633628066 | 1.27E-09    |
| SCO2        | 0.979039692 | 5.39E-22    | SMIM29       | -0.634600025 | 1.03E-06    |
| PPAN        | 0.978340928 | 4.66E-44    | IFITM1       | -0.635554741 | 0.001176269 |
| DUSP7       | 0.976588342 | 1.18E-17    | IL1R1        | -0.635983163 | 3.60E-09    |
| RPL23AP7    | 0.971367696 | 9.90E-05    | NRBP2        | -0.635992714 | 9.95E-10    |
| SLC16A1-AS1 | 0.971279794 | 0.00014125  | ARHGEF10L    | -0.636650531 | 8.43E-08    |
| KLHL23      | 0.96661664  | 2.51E-17    | GRB7         | -0.636740196 | 4.94E-07    |
| RPP40       | 0.964409562 | 9.47E-24    | ZDHHC12      | -0.636992013 | 5.87E-17    |
| SKP2        | 0.961245259 | 2.14E-21    | KCNK15       | -0.637250958 | 2.32E-20    |
| TMEM158     | 0.961011392 | 0.001778693 | BHLHE41      | -0.637409491 | 0.025720503 |
| PUS7        | 0.960808323 | 9.06E-62    | ACADS        | -0.638909218 | 0.000624209 |
| TRMT11      | 0.960328932 | 1.42E-32    | TTC30A       | -0.639489634 | 0.000279709 |

|            |             |             |            |              |             |
|------------|-------------|-------------|------------|--------------|-------------|
| CCDC58     | 0.959977431 | 2.98E-30    | AC005821.1 | -0.639934025 | 0.00498031  |
| AC011603.3 | 0.958630824 | 0.004423583 | SELENBP1   | -0.640294069 | 0.032290407 |
| LAMC3      | 0.958330866 | 0.001761234 | SELL       | -0.640338364 | 0.002860034 |
| POLR1B     | 0.95820442  | 3.71E-58    | SEC14L2    | -0.641744652 | 0.002423724 |
| TFB2M      | 0.957192901 | 2.59E-26    | GRAMD2B    | -0.641856896 | 8.14E-08    |
| SNHG4      | 0.956949853 | 8.26E-22    | CEMIP2     | -0.641971703 | 2.03E-17    |
| FAM117B    | 0.956316626 | 9.76E-19    | TTLL1      | -0.64246778  | 0.000216795 |
| SNHG26     | 0.954780041 | 2.71E-06    | IDNK       | -0.643201677 | 0.002142416 |
| CYCS       | 0.952690168 | 1.62E-76    | H2BC21     | -0.643486239 | 8.26E-18    |
| RIOK1      | 0.952430158 | 4.24E-43    | PCDH1      | -0.644011411 | 1.31E-12    |
| IFRD1      | 0.952003866 | 1.09E-60    | NRM        | -0.644065345 | 7.55E-05    |
| TYRO3      | 0.951913718 | 1.14E-23    | OAS1       | -0.644124736 | 1.23E-05    |
| CCDC85B    | 0.950855449 | 3.44E-66    | ARSA       | -0.644831046 | 7.44E-09    |
| DLEU1      | 0.949832954 | 1.91E-13    | ALDH6A1    | -0.644891954 | 3.21E-13    |
| CDR2L      | 0.948666222 | 7.78E-39    | STAT2      | -0.645430057 | 7.30E-15    |
| DIMT1      | 0.947625328 | 7.55E-48    | CLDN23     | -0.645759076 | 3.70E-06    |
| ADAM11     | 0.947044091 | 4.32E-08    | IL4R       | -0.645769443 | 2.01E-11    |
| SUPV3L1    | 0.945371579 | 1.22E-36    | ZBED6      | -0.645960271 | 4.74E-12    |
| TASOR2     | 0.944986792 | 2.66E-12    | ZDHHC2     | -0.64609104  | 0.033783312 |
| NFKBIB     | 0.941599972 | 8.00E-24    | LINC01547  | -0.646739376 | 2.60E-05    |
| BCL11B     | 0.938960581 | 7.33E-09    | ZNF747     | -0.646817917 | 2.41E-05    |
| THAP4      | 0.937767128 | 3.15E-45    | COL9A2     | -0.647019324 | 0.000251021 |
| AC125807.2 | 0.936783504 | 5.01E-12    | TSPAN31    | -0.647970472 | 8.64E-11    |
| C15orf39   | 0.936697816 | 1.92E-34    | LINC00638  | -0.648408364 | 0.034648062 |
| ODC1       | 0.936308697 | 1.09E-65    | DIO2       | -0.648516401 | 2.82E-12    |
| UBE3D      | 0.935344352 | 2.27E-08    | TMEM86A    | -0.64868648  | 0.000328898 |
| DGUOK-AS1  | 0.931973327 | 0.003144912 | EPHA2      | -0.64884693  | 3.05E-17    |
| SLC39A14   | 0.928135101 | 5.53E-41    | UPK2       | -0.649709318 | 6.73E-11    |
| GLS        | 0.92723611  | 2.50E-58    | WDR31      | -0.649743096 | 0.011447094 |
| SNRPA1     | 0.926608743 | 8.67E-64    | MYADM      | -0.649969811 | 1.05E-11    |
| PNO1       | 0.923873503 | 1.20E-41    | ALPP       | -0.650015004 | 0.003131963 |
| ZBTB2      | 0.923526976 | 5.18E-45    | GPX8       | -0.650523513 | 1.33E-09    |
| NT5DC3     | 0.921788997 | 3.17E-10    | WDR66      | -0.650908728 | 0.037417547 |
| FMNL2      | 0.921046413 | 2.61E-22    | RAB26      | -0.650931348 | 2.60E-09    |
| POLR1C     | 0.919447407 | 5.20E-46    | REEP1      | -0.651152518 | 0.020091214 |
| NCS1       | 0.916638757 | 7.61E-51    | CYLD       | -0.651320845 | 1.31E-10    |
| CALML4     | 0.914021986 | 0.001139166 | ST6GALNAC4 | -0.65193393  | 0.002002803 |
| CNTNAP2    | 0.913846732 | 0.003290861 | SRRM2-AS1  | -0.652408343 | 0.013458648 |
| PDSS1      | 0.911850531 | 1.79E-22    | OBSL1      | -0.652463245 | 2.14E-29    |
| CNKSR3     | 0.911359291 | 1.43E-07    | MAPK4      | -0.652512764 | 0.047965054 |
| PRR5       | 0.911022135 | 7.13E-31    | FCHSD1     | -0.652866609 | 5.24E-08    |
| IMPDH1     | 0.907852928 | 2.04E-55    | SFXN3      | -0.65373942  | 2.93E-07    |
| NTHL1      | 0.906509843 | 8.43E-24    | FIBCD1     | -0.653989309 | 1.16E-09    |
| SLC35F2    | 0.905359616 | 1.33E-32    | GATA3      | -0.65410395  | 1.17E-49    |
| MRM3       | 0.905105817 | 1.44E-37    | RPRM       | -0.654416137 | 0.023240542 |
| NUDT4P2    | 0.904828288 | 0.000223142 | PLAUR      | -0.655798553 | 0.013428242 |
| SLC12A8    | 0.904756336 | 1.87E-08    | LRRC23     | -0.655939052 | 0.008874137 |

|            |             |             |            |              |             |
|------------|-------------|-------------|------------|--------------|-------------|
| ADCY3      | 0.902227285 | 1.41E-43    | SH3BGRL    | -0.655941099 | 5.95E-17    |
| RNA5-8SN1  | 0.90136834  | 0.005900427 | S1PR3      | -0.655952988 | 4.65E-13    |
| TOP1MT     | 0.900634435 | 8.13E-55    | TES        | -0.656031156 | 6.40E-16    |
| SIK1B      | 0.89888919  | 3.82E-22    | MCOLN3     | -0.656489563 | 0.009875578 |
| FZD9       | 0.898693138 | 0.006692309 | MOSPD3     | -0.656703476 | 6.49E-10    |
| NUFIP1     | 0.898203201 | 7.94E-21    | LAMA3      | -0.656862169 | 0.008180159 |
| PFDN2      | 0.897671126 | 1.15E-32    | AC008014.1 | -0.657143972 | 0.015128399 |
| FASTKD1    | 0.896372216 | 3.54E-22    | SMPDL3A    | -0.657169245 | 1.63E-05    |
| BLMH       | 0.89626238  | 1.88E-31    | C4orf19    | -0.657510721 | 4.00E-11    |
| RAPGEF5    | 0.89281739  | 0.000299315 | C5AR2      | -0.657805662 | 0.019586294 |
| SLC9B2     | 0.89256409  | 9.63E-10    | AC021087.5 | -0.657808391 | 0.003787764 |
| AL391244.2 | 0.892442329 | 0.003344699 | TNRC6C-AS1 | -0.657823503 | 0.000717655 |
| SLC19A1    | 0.89122131  | 8.23E-38    | RNF215     | -0.658506861 | 2.53E-08    |
| FXN        | 0.889602438 | 3.52E-17    | RNFT1      | -0.658742445 | 2.72E-08    |
| PRR19      | 0.888346148 | 3.85E-06    | CLCN4      | -0.659079545 | 0.030310346 |
| AP002387.2 | 0.888062986 | 6.64E-05    | LHX2       | -0.659556136 | 0.005911418 |
| SCLY       | 0.886923144 | 1.26E-26    | KLF4       | -0.659953042 | 1.62E-13    |
| PSAT1      | 0.885983294 | 6.95E-57    | ZNF117     | -0.659991653 | 6.25E-08    |
| WDR12      | 0.885872875 | 7.40E-41    | DHRS12     | -0.660779798 | 0.013421505 |
| AL118516.1 | 0.882206331 | 2.76E-06    | C20orf204  | -0.660780252 | 0.048186707 |
| CEBPD      | 0.878470276 | 3.66E-10    | PXDN       | -0.660920685 | 5.27E-18    |
| PPTC7      | 0.875224841 | 6.30E-28    | SLCO4C1    | -0.662257548 | 0.021449729 |
| ISM1       | 0.873322755 | 0.010184143 | AL162258.1 | -0.662673839 | 0.035307741 |
| CDC42EP2   | 0.873224463 | 0.000294462 | CAV1       | -0.662842743 | 3.83E-20    |
| TRAP1      | 0.872944348 | 3.78E-79    | MTMR7      | -0.66311857  | 0.032305768 |
| KBTBD6     | 0.872877158 | 4.28E-20    | RNFT2      | -0.663177003 | 0.000627445 |
| NAMPTP1    | 0.872026008 | 4.63E-13    | SH3TC2     | -0.663608138 | 0.03144905  |
| ATP6V1C2   | 0.872004412 | 0.000946923 | TTC30B     | -0.664075658 | 0.000541879 |
| POLR3K     | 0.8712951   | 1.94E-46    | PNPLA8     | -0.664769685 | 9.21E-22    |
| MCTS2P     | 0.870268579 | 0.019456982 | TRIM62     | -0.665370348 | 7.05E-10    |
| NOP56      | 0.869963352 | 1.43E-62    | LARP6      | -0.665738285 | 0.008519193 |
| DIXDC1     | 0.865166266 | 0.000289186 | COL18A1    | -0.666301468 | 8.34E-17    |
| BOP1       | 0.864213445 | 3.83E-79    | TPO        | -0.667006267 | 0.015903696 |
| C1QBP      | 0.862623105 | 4.06E-71    | BNIP3L     | -0.667190587 | 8.99E-16    |
| XPOT       | 0.86161174  | 7.43E-78    | EDN1       | -0.667439173 | 0.003023683 |
| PUM3       | 0.861260851 | 8.50E-41    | ADIRF      | -0.667532666 | 1.03E-09    |
| MTHFD2     | 0.860830383 | 2.68E-71    | PPOX       | -0.667713696 | 7.58E-06    |
| RPUSD4     | 0.859932391 | 1.66E-24    | SULT2B1    | -0.667732495 | 9.22E-06    |
| SLC25A22   | 0.859326055 | 1.57E-36    | MYO16      | -0.667991516 | 0.021838327 |
| FTL        | 0.859127443 | 2.49E-47    | TBC1D2     | -0.668445173 | 1.30E-07    |
| AC097448.1 | 0.858425995 | 2.65E-06    | VMAC       | -0.668966763 | 0.027427861 |
| NCL        | 0.858242771 | 3.16E-65    | AC244090.1 | -0.668983052 | 0.01542087  |
| ZC3H8      | 0.857553925 | 9.73E-19    | TMSB4X     | -0.669446441 | 3.10E-51    |
| ADGRA3     | 0.856276365 | 6.66E-35    | SNAI3-AS1  | -0.669716141 | 0.032425041 |
| SLC7A11    | 0.855990354 | 2.74E-12    | ATP2B4     | -0.669813189 | 0.002279983 |
| PRELID3A   | 0.855687339 | 2.92E-07    | ANXA9      | -0.669867261 | 7.08E-13    |
| PER1       | 0.853367079 | 4.08E-12    | SQOR       | -0.670002842 | 3.11E-10    |

|            |             |             |            |              |             |
|------------|-------------|-------------|------------|--------------|-------------|
| IMP4       | 0.851828242 | 3.00E-59    | MOCS1      | -0.670400968 | 0.000117463 |
| NOTCH1     | 0.851228186 | 2.06E-20    | ARNTL      | -0.670442774 | 9.63E-07    |
| GRK5       | 0.850113684 | 7.54E-05    | EVA1B      | -0.670908558 | 0.002362178 |
| PMAIP1     | 0.849932914 | 1.18E-06    | PHF1       | -0.671445417 | 1.45E-11    |
| AC011462.5 | 0.84976626  | 0.046213411 | SCN8A      | -0.671480073 | 0.011982044 |
| MARS2      | 0.849401297 | 7.68E-23    | AP006222.1 | -0.671889342 | 0.000687555 |
| GNB1L      | 0.848576949 | 3.97E-16    | ANKRD20A5P | -0.672722848 | 0.008925979 |
| C1orf109   | 0.848157926 | 1.50E-19    | S100A9     | -0.672891634 | 5.67E-05    |
| NKD2       | 0.848082699 | 2.76E-06    | AL137003.1 | -0.673529592 | 0.043730754 |
| MRPS2      | 0.847860989 | 5.41E-52    | UPK3BL2    | -0.6741818   | 0.035112137 |
| DHX37      | 0.84735292  | 2.72E-45    | ARHGAP29   | -0.674263806 | 2.44E-15    |
| CTU2       | 0.846590069 | 1.62E-24    | CCDC162P   | -0.674914987 | 0.010033943 |
| CTU1       | 0.846039676 | 1.44E-11    | OCEL1      | -0.675013577 | 0.000380721 |
| FBXO45     | 0.842162642 | 2.01E-54    | RALY-AS1   | -0.675256422 | 0.005195751 |
| NOC3L      | 0.839295201 | 6.38E-31    | YPEL5      | -0.675332306 | 4.25E-17    |
| TTLL12     | 0.837740191 | 5.08E-60    | SYTL1      | -0.675831329 | 1.08E-07    |
| MYBBP1A    | 0.83560049  | 1.22E-48    | BMF        | -0.675922823 | 0.000345197 |
| PCSK6      | 0.834825268 | 1.57E-12    | ARFGAP3    | -0.676046207 | 2.24E-11    |
| AGPAT5     | 0.834019767 | 6.70E-38    | MDK        | -0.676856034 | 2.44E-22    |
| FKBP11     | 0.832255026 | 2.78E-18    | PRKACB     | -0.677320319 | 0.00469611  |
| TANGO6     | 0.832120592 | 3.15E-15    | IDUA       | -0.677321743 | 0.000375215 |
| HSPE1-MOB4 | 0.831880147 | 3.65E-06    | AL354707.1 | -0.677473277 | 0.002997606 |
| ZIC5       | 0.831755368 | 2.01E-08    | CUEDC1     | -0.677484218 | 1.06E-12    |
| PDXP       | 0.831743422 | 7.25E-21    | ERRF1      | -0.677532705 | 9.63E-06    |
| DNAAF2     | 0.829886125 | 1.63E-26    | SLC16A13   | -0.677726932 | 0.001227367 |
| LRRC3      | 0.829210627 | 0.000937852 | RSPH3      | -0.678119881 | 2.58E-07    |
| NIP7       | 0.828857826 | 1.66E-49    | TRG-AS1    | -0.678634133 | 0.023546182 |
| C12orf29   | 0.828386148 | 1.97E-17    | CCT6B      | -0.678852132 | 0.047819763 |
| TRPM6      | 0.827416771 | 0.018918766 | AMOTL2     | -0.678875089 | 8.74E-20    |
| NXPH4      | 0.827194105 | 1.47E-11    | MTMR11     | -0.67894957  | 5.72E-10    |
| TAF1A      | 0.827041376 | 1.39E-08    | UPK3B      | -0.679183482 | 2.01E-12    |
| HOMER1     | 0.826022106 | 4.49E-31    | SEMA7A     | -0.680135924 | 0.000283588 |
| PTDSS1     | 0.825986673 | 1.13E-50    | RIMS3      | -0.680233712 | 1.64E-12    |
| WDR74      | 0.82492759  | 3.14E-44    | RMST       | -0.680558796 | 0.038383176 |
| CD320      | 0.824290425 | 4.22E-26    | AC022400.7 | -0.681598094 | 0.021612218 |
| GARNL3     | 0.82325485  | 0.009308968 | GALNT12    | -0.681691472 | 3.45E-05    |
| SEH1L      | 0.823220503 | 1.74E-37    | AP3B2      | -0.682004616 | 0.047091808 |
| MAK16      | 0.823200912 | 2.45E-24    | VGLL1      | -0.682445323 | 0.001836436 |
| THAP11     | 0.822734186 | 3.24E-29    | CU634019.2 | -0.682614206 | 0.036678346 |
| AHCTF1     | 0.821909701 | 6.35E-34    | AHRR_1     | -0.682727555 | 0.000880965 |
| PUS1       | 0.821817402 | 6.05E-34    | FLNA       | -0.683742783 | 2.18E-26    |
| TNFRSF10A  | 0.821743613 | 2.58E-15    | HLA-F      | -0.684262273 | 0.000720842 |
| C12orf73   | 0.821191541 | 8.02E-10    | USP35      | -0.684746103 | 2.94E-05    |
| CMTM8      | 0.820099803 | 0.000118496 | MAGED1     | -0.685009598 | 8.48E-32    |
| EXOSC4     | 0.819165443 | 9.59E-39    | ZNF713     | -0.68587083  | 0.001785481 |
| NCR3LG1    | 0.819136266 | 0.030007308 | AL365181.2 | -0.685908176 | 0.002079514 |
| AC022384.1 | 0.818740721 | 0.002542558 | RAB19      | -0.686367006 | 0.018533172 |



|            |             |             |              |              |             |
|------------|-------------|-------------|--------------|--------------|-------------|
| RIOX2      | 0.817979348 | 3.17E-39    | PARP10       | -0.686665896 | 7.79E-22    |
| INTS13     | 0.81740508  | 2.45E-30    | TCAF2        | -0.686710558 | 0.008112666 |
| EEF1E1     | 0.817398878 | 5.17E-23    | NEU1         | -0.686751029 | 9.28E-22    |
| HSPD1      | 0.816595003 | 1.16E-71    | AC023158.1   | -0.687037658 | 0.002761818 |
| CHORDC1    | 0.815912787 | 4.76E-36    | H6PD         | -0.687209697 | 1.84E-09    |
| SLC27A4    | 0.815775564 | 2.36E-36    | MARCHF2      | -0.688173947 | 4.91E-06    |
| EIF3J      | 0.815402881 | 7.55E-48    | TGFBI        | -0.688918379 | 0.003643243 |
| CDV3       | 0.815391171 | 2.18E-52    | CALCOCO1     | -0.688970624 | 1.79E-12    |
| MDN1       | 0.814390068 | 7.90E-21    | ADAMTS13     | -0.689101298 | 3.54E-05    |
| USP31      | 0.813684643 | 2.31E-21    | CDKN2B       | -0.689202861 | 2.05E-13    |
| RBM28      | 0.813565575 | 8.15E-43    | DSC2         | -0.689292903 | 1.35E-15    |
| RSL1D1     | 0.81162889  | 5.49E-76    | RSPH1        | -0.689326319 | 0.000356024 |
| SLC25A15   | 0.811272096 | 1.61E-36    | ATP2B1-AS1   | -0.689849972 | 0.00813413  |
| VPS9D1-AS1 | 0.81024368  | 4.09E-24    | INHA         | -0.689912801 | 0.000666342 |
| MAST1      | 0.809185992 | 0.005890739 | OSBPL5       | -0.690069365 | 1.43E-06    |
| CCDC59     | 0.808475612 | 4.64E-32    | PPP1R14B-AS1 | -0.690117022 | 0.04921954  |
| C16orf46   | 0.808453558 | 0.047369044 | BASP1        | -0.690133857 | 1.25E-33    |
| NT5C3A     | 0.8084032   | 3.36E-24    | USP51        | -0.69065145  | 0.003022498 |
| WNK2       | 0.808094535 | 1.76E-21    | CTSO         | -0.690674303 | 0.001323587 |
| SLC25A37   | 0.807240759 | 1.79E-23    | CD82         | -0.690690232 | 0.00012874  |
| COQ10A     | 0.807154814 | 1.90E-06    | FO681492.1   | -0.690727395 | 0.002208194 |
| MRT04      | 0.806946301 | 1.34E-41    | PLEKHB1      | -0.69166829  | 0.004183953 |
| RUVBL1     | 0.805561877 | 5.01E-53    | PPP2R5B      | -0.69204367  | 8.74E-07    |
| PM20D2     | 0.804812226 | 5.34E-23    | LINC02600    | -0.692347092 | 0.026494564 |
| APTR       | 0.804798835 | 4.87E-12    | ST3GAL3      | -0.692469358 | 0.013174561 |
| KLHL18     | 0.804088072 | 1.47E-21    | VPS9D1       | -0.692479828 | 1.14E-07    |
| ADRA2C     | 0.803834681 | 3.53E-13    | UNC13D       | -0.692689124 | 9.00E-22    |
| RPF2       | 0.803565162 | 2.53E-30    | DBN1         | -0.692718587 | 8.79E-17    |
| AP001505.1 | 0.802762352 | 0.028798038 | LXN          | -0.692726673 | 4.28E-06    |
| ZNF639     | 0.799102905 | 2.49E-31    | OAS3         | -0.692754671 | 2.79E-28    |
| FAM189B    | 0.798106968 | 2.90E-22    | SLC24A1      | -0.693101071 | 1.24E-11    |
| DGKE       | 0.797170211 | 3.93E-21    | TSPAN1       | -0.693214619 | 4.31E-06    |
| BRIX1      | 0.797099967 | 2.62E-38    | NECTIN2      | -0.693290754 | 1.36E-29    |
| XPO5       | 0.79706311  | 6.89E-44    | TENT5C       | -0.694952327 | 7.08E-05    |
| CMSS1      | 0.796821292 | 1.20E-32    | PBLD         | -0.695545491 | 6.43E-05    |
| QSOX2      | 0.796651925 | 1.70E-40    | ERP27        | -0.695721239 | 5.95E-05    |
| CTSC       | 0.796590694 | 2.49E-17    | ADIRF-AS1    | -0.69580214  | 0.00013942  |
| TIMM44     | 0.796361284 | 1.02E-28    | EPS8L1       | -0.696012808 | 5.86E-16    |
| SOX12      | 0.796328096 | 2.19E-32    | PALLD        | -0.696265018 | 4.88E-23    |
| LYRM4      | 0.794050721 | 1.83E-11    | ACACB        | -0.697372484 | 1.07E-06    |
| TEC        | 0.793079431 | 0.000200216 | APOBEC3B     | -0.697667522 | 7.10E-05    |
| DHX33      | 0.79224587  | 5.88E-27    | OSCP1        | -0.698680708 | 0.016855578 |
| PACC1      | 0.791542851 | 4.83E-08    | FAM221A      | -0.698829554 | 0.001023019 |
| ELL3       | 0.791057606 | 2.63E-08    | NFKBIZ       | -0.698902111 | 2.22E-11    |
| DEPTOR     | 0.790676912 | 3.14E-06    | TRIM16       | -0.699155372 | 5.96E-24    |
| ENTR1      | 0.790118188 | 5.09E-40    | TRIM2        | -0.699320115 | 0.000622016 |
| ZIC2       | 0.787453596 | 1.70E-12    | LYN          | -0.699468407 | 0.02391598  |

|            |             |             |            |              |             |
|------------|-------------|-------------|------------|--------------|-------------|
| DCUN1D5    | 0.786664328 | 1.21E-34    | TP53I3     | -0.699981565 | 5.08E-05    |
| FLVCR1     | 0.785830606 | 9.45E-10    | DUSP5      | -0.70010079  | 6.04E-07    |
| MTCP1      | 0.785515987 | 0.025848853 | GALC       | -0.700149619 | 0.01505069  |
| NPL        | 0.78453819  | 0.045097623 | AC093001.1 | -0.701482979 | 8.54E-12    |
| SHANK3     | 0.784450527 | 4.08E-07    | LAMB2      | -0.702130113 | 2.28E-34    |
| NUDT19     | 0.784358396 | 1.04E-22    | C1orf115   | -0.702167387 | 1.27E-05    |
| MIR4458HG  | 0.783596587 | 0.014756497 | ETHE1      | -0.702608193 | 4.25E-06    |
| PNPT1      | 0.783171705 | 7.53E-39    | MLPH       | -0.702948874 | 1.67E-39    |
| RNA5-8SN2  | 0.782705405 | 0.007404306 | DAPK2      | -0.703001831 | 1.27E-08    |
| RTN4RL2    | 0.782511967 | 0.030947942 | FRG1BP     | -0.703110617 | 1.50E-12    |
| ESF1       | 0.781845333 | 1.53E-30    | PKD1L2     | -0.704262579 | 0.01239411  |
| CFAP97     | 0.781012169 | 5.53E-33    | GLB1L      | -0.704848247 | 0.003940069 |
| GAR1       | 0.780499667 | 1.07E-14    | DOCK8-AS1  | -0.70486539  | 0.011292924 |
| GNB4       | 0.779668419 | 0.000330964 | CACFD1     | -0.704917361 | 4.42E-12    |
| IL17D      | 0.779572732 | 7.39E-10    | LRP10      | -0.705023082 | 1.14E-31    |
| RNF138     | 0.779297959 | 2.70E-27    | OAS2       | -0.705587972 | 1.09E-06    |
| RP9        | 0.778767491 | 1.74E-12    | AC006372.2 | -0.705810092 | 0.017014091 |
| CISD1      | 0.777157489 | 4.20E-16    | LMCD1      | -0.706016442 | 6.18E-06    |
| MPP3       | 0.777004584 | 1.06E-05    | WLS        | -0.70618595  | 0.01416594  |
| HSPE1      | 0.77635068  | 3.16E-56    | KIAA0513   | -0.706317536 | 2.27E-14    |
| YDJC       | 0.775572091 | 1.81E-33    | GOLGA7B    | -0.706788717 | 0.000189338 |
| ABLIM1     | 0.774799004 | 1.97E-28    | OPHN1      | -0.708041178 | 6.36E-08    |
| GRB14      | 0.773208452 | 4.29E-10    | COL4A6     | -0.708565776 | 0.005370012 |
| Z83844.3   | 0.773156983 | 9.66E-06    | PCDHA11    | -0.708608715 | 2.51E-09    |
| PAK1IP1    | 0.77219936  | 1.04E-23    | SMAD3      | -0.708824186 | 5.19E-20    |
| KAZN       | 0.771754586 | 1.35E-16    | CAMK2N1    | -0.709952413 | 4.67E-21    |
| AC107871.1 | 0.770726545 | 1.48E-06    | NFATC2     | -0.710048772 | 4.22E-06    |
| RPARP-AS1  | 0.769209634 | 6.14E-09    | DGCR6      | -0.710075991 | 0.002423178 |
| GLRX3      | 0.769126388 | 6.96E-39    | TENT5A     | -0.710464012 | 1.31E-14    |
| ADM5       | 0.768004385 | 0.000104913 | DNAH10OS   | -0.710518544 | 0.000922585 |
| CC2D2A     | 0.767926901 | 1.09E-06    | SMIM14     | -0.711221526 | 6.23E-28    |
| POLR1E     | 0.767373623 | 4.26E-17    | PRRT1B     | -0.711328933 | 0.025631145 |
| THRA       | 0.767021821 | 5.03E-05    | EPHA1      | -0.711471588 | 3.49E-17    |
| RNA5-8SN3  | 0.766742972 | 0.008676367 | C1orf226   | -0.711840115 | 4.30E-05    |
| LTV1       | 0.765914483 | 8.86E-31    | CPEB4      | -0.712833718 | 6.56E-10    |
| AKAP1      | 0.764709113 | 2.10E-44    | CD109      | -0.713168015 | 1.95E-05    |
| DNAH14     | 0.764344091 | 9.27E-06    | SDSL       | -0.714094399 | 1.60E-16    |
| MBLAC2     | 0.763452733 | 1.74E-08    | KIAA1217   | -0.714619729 | 7.45E-11    |
| NPM1       | 0.763196594 | 9.93E-64    | HDAC5      | -0.715904126 | 1.12E-05    |
| WDR4       | 0.762545016 | 7.82E-15    | CREB3L4    | -0.716009127 | 1.91E-14    |
| ADORA2B    | 0.762146838 | 2.54E-07    | GPR173     | -0.717548617 | 0.02629132  |
| DFFB       | 0.761850344 | 2.95E-05    | YPEL3      | -0.717700088 | 4.08E-12    |
| FP565260.1 | 0.761700119 | 3.24E-28    | CTSK       | -0.71872055  | 0.048187344 |
| STOM       | 0.761563064 | 3.46E-31    | LRTOMT     | -0.718784964 | 0.000291773 |
| CIART      | 0.760651851 | 2.78E-11    | PRLR       | -0.719005755 | 1.28E-16    |
| FAM155B    | 0.760566064 | 5.07E-12    | SMPD1      | -0.71911358  | 2.72E-19    |
| PDP2       | 0.758686319 | 7.37E-16    | PCLO       | -0.719983919 | 0.000380538 |

|             |             |             |            |              |             |
|-------------|-------------|-------------|------------|--------------|-------------|
| CDC25A      | 0.757674923 | 3.86E-14    | PCOLCE     | -0.720867857 | 0.000225817 |
| PPID        | 0.756557821 | 1.35E-31    | CES3       | -0.721076574 | 0.030840339 |
| NOP14       | 0.755497486 | 5.58E-43    | SPSB2      | -0.721190553 | 0.00026106  |
| PINX1_2     | 0.755268517 | 1.04E-11    | LIPH       | -0.721606896 | 0.001617841 |
| HEATR1      | 0.754612492 | 2.63E-29    | SLC46A3    | -0.721896534 | 8.04E-05    |
| BOD1        | 0.754591554 | 4.86E-47    | MUC3A      | -0.722063025 | 8.01E-07    |
| GATAD2A     | 0.754346692 | 5.24E-45    | HELZ2      | -0.722150037 | 5.39E-21    |
| C12orf45    | 0.753511219 | 6.97E-10    | KCNN4      | -0.724075016 | 3.71E-09    |
| TUBGCP4     | 0.752434409 | 4.43E-21    | MAGED2     | -0.724110997 | 5.22E-26    |
| EXOSC7      | 0.752202902 | 5.08E-19    | MFGE8      | -0.724577119 | 2.53E-05    |
| ECSIT       | 0.751517703 | 2.40E-26    | TMEM154    | -0.725638696 | 0.00977576  |
| PPAT        | 0.750953351 | 2.45E-35    | PLA2G4F    | -0.726387101 | 0.014327778 |
| CNNM1       | 0.749511987 | 6.41E-07    | HID1       | -0.726660031 | 4.26E-28    |
| TFAP4       | 0.749351224 | 2.76E-21    | AC092117.1 | -0.72723822  | 0.000142774 |
| AC125257.1  | 0.74915626  | 0.003749388 | ABCD1      | -0.727338801 | 4.12E-07    |
| C20orf27    | 0.7491526   | 4.11E-47    | ZNF703     | -0.727548448 | 0.000218228 |
| RNASEH1-AS1 | 0.74848059  | 1.11E-08    | AC090114.2 | -0.727595816 | 3.32E-09    |
| URB1        | 0.747267295 | 1.72E-19    | CELSR2     | -0.727658359 | 1.68E-07    |
| PRMT5       | 0.746872567 | 6.48E-47    | HERC6      | -0.728890475 | 2.91E-07    |
| MRPL50      | 0.746647624 | 3.74E-27    | LRP1       | -0.728965198 | 0.000272085 |
| SNHG21      | 0.745809015 | 0.00254813  | KIF13B     | -0.729119751 | 3.33E-11    |
| TYW3        | 0.744126467 | 5.69E-17    | ENPP5      | -0.730162541 | 1.11E-05    |
| NOB1        | 0.743434982 | 7.69E-42    | PMEL       | -0.730638134 | 0.018166583 |
| CCT6P1      | 0.742934703 | 0.00045588  | ZNF658     | -0.731728313 | 0.014238365 |
| GTF2F2      | 0.742690015 | 2.57E-23    | THNSL2     | -0.73176302  | 1.46E-09    |
| TMC8        | 0.741013519 | 0.003918342 | CLEC2D     | -0.732032075 | 0.000211622 |
| BZW2        | 0.740861991 | 9.47E-31    | SPAG4      | -0.732261624 | 0.003781858 |
| SNHG10      | 0.740712048 | 9.10E-12    | ZNF596     | -0.732736391 | 0.002413609 |
| CDK5R1      | 0.739362895 | 0.001976414 | MCC        | -0.73420192  | 0.001214136 |
| AP000648.4  | 0.739328218 | 0.049371246 | PTPRE      | -0.73482253  | 1.32E-06    |
| FOXO3B      | 0.739050671 | 4.75E-05    | PRPF40B    | -0.734835336 | 6.31E-07    |
| NAF1        | 0.738408543 | 1.80E-14    | CHMP2A     | -0.73515233  | 4.94E-22    |
| WDR35       | 0.738101343 | 1.31E-14    | JAKMIP2    | -0.735468958 | 0.019248463 |
| PRMT1       | 0.737832325 | 7.39E-42    | BCAS1      | -0.73599539  | 3.87E-25    |
| SAPCD2      | 0.737829969 | 2.15E-37    | KRT7-AS    | -0.736173315 | 0.02113065  |
| CCDC88C     | 0.737157902 | 5.46E-22    | CMPK2      | -0.736352523 | 0.005619612 |
| NFIX        | 0.736498354 | 1.79E-10    | C17orf82   | -0.736489198 | 0.008652504 |
| C5orf30     | 0.735869348 | 1.58E-17    | S100A14    | -0.736537803 | 7.50E-05    |
| PES1        | 0.735632461 | 3.94E-48    | PLD1       | -0.736720237 | 0.000453442 |
| PDCD11      | 0.735004333 | 1.77E-30    | KRT80      | -0.736879285 | 9.68E-29    |
| DLX1        | 0.734949637 | 3.10E-08    | PALM2AKAP2 | -0.73845072  | 0.005686575 |
| TAF5        | 0.734195065 | 1.67E-10    | KRT18      | -0.738819287 | 1.80E-07    |
| MRPS12      | 0.734144018 | 3.53E-30    | HLA-DQB1   | -0.738862115 | 3.38E-09    |
| DIAPH2      | 0.733168145 | 3.55E-11    | PLTP       | -0.73891163  | 0.027524001 |
| PARVB       | 0.73284775  | 0.000352986 | LYPD6      | -0.739115727 | 8.86E-12    |
| AK6         | 0.732520992 | 5.29E-24    | TK2        | -0.739566241 | 6.07E-05    |
| TIMM17A     | 0.732256744 | 1.60E-30    | DYRK1B     | -0.739625818 | 2.40E-10    |

|            |             |             |            |              |             |
|------------|-------------|-------------|------------|--------------|-------------|
| DCTPP1     | 0.732183512 | 1.60E-45    | C2CD4C     | -0.740199328 | 0.013999747 |
| GTF2H2     | 0.731883373 | 5.98E-24    | SMOX       | -0.74053881  | 0.01883898  |
| GTPBP4     | 0.731556938 | 2.15E-44    | ANXA3      | -0.741174798 | 1.91E-13    |
| ZBTB24     | 0.731542727 | 2.18E-18    | ULBP2      | -0.742683371 | 1.24E-07    |
| GEMIN4     | 0.729835355 | 2.56E-29    | SEMA4F     | -0.742890643 | 2.16E-05    |
| PIM2       | 0.729627225 | 1.22E-08    | CMAHP      | -0.743056044 | 0.022576642 |
| FBL        | 0.729572063 | 8.90E-29    | NAP1L2     | -0.743858604 | 0.009223137 |
| LRIG3      | 0.729384509 | 2.31E-07    | GNG7       | -0.744117315 | 0.003040604 |
| FASTKD3    | 0.728269348 | 5.59E-10    | SLC28A1    | -0.745003047 | 0.033829282 |
| MARC1      | 0.72800537  | 4.32E-11    | RIN2       | -0.745016656 | 2.15E-09    |
| CDC123     | 0.727912027 | 5.62E-38    | CBLB       | -0.7452978   | 7.70E-08    |
| SLC19A2    | 0.727582411 | 3.81E-15    | LINC01521  | -0.745313705 | 1.49E-05    |
| PAM16      | 0.727290932 | 1.16E-19    | ULK1       | -0.745585791 | 5.10E-33    |
| C15orf61   | 0.726597172 | 1.22E-06    | FAM214B    | -0.745650971 | 0.003084751 |
| RAB29      | 0.726324167 | 1.22E-14    | FXYD3      | -0.746134433 | 3.95E-23    |
| ICOSLG     | 0.726075673 | 1.59E-05    | C9orf106   | -0.746367805 | 0.030582129 |
| FBRSL1     | 0.725535022 | 8.88E-41    | PHLDA1     | -0.746969346 | 0.000867991 |
| DOHH       | 0.724705376 | 1.30E-12    | BAIAP2-DT  | -0.747562824 | 2.77E-12    |
| DUS3L      | 0.72438753  | 1.55E-20    | AC159540.2 | -0.747750039 | 0.034678204 |
| RPRD1A     | 0.723692555 | 1.94E-32    | AMZ1       | -0.748095396 | 5.07E-08    |
| CHAC2      | 0.722801264 | 4.75E-10    | F2R        | -0.748321257 | 0.001594142 |
| NOP2       | 0.721986035 | 1.66E-38    | WDR78      | -0.749235196 | 0.020841609 |
| CEP83      | 0.721731988 | 1.13E-14    | PTGR1      | -0.750683479 | 0.005280979 |
| UTP4       | 0.721097922 | 9.28E-35    | ALDH1A3    | -0.750686453 | 1.77E-09    |
| AHSA1      | 0.721058811 | 4.18E-49    | MYLK       | -0.750742604 | 0.011765441 |
| MRPS30     | 0.720452874 | 2.08E-24    | GABRP      | -0.751335905 | 7.51E-10    |
| TUBE1      | 0.718937189 | 1.03E-06    | SERPINB8   | -0.751381579 | 0.019784783 |
| ARMC6      | 0.718420257 | 1.97E-24    | ZBED5-AS1  | -0.751648548 | 0.014974447 |
| MEST       | 0.717714786 | 4.67E-41    | ETV5       | -0.751938669 | 0.005498879 |
| NT5DC2     | 0.717087161 | 8.93E-30    | PRRT2      | -0.75206839  | 0.000208828 |
| CTPS1      | 0.715579133 | 1.00E-34    | APOL6      | -0.75214333  | 2.04E-09    |
| SIM2       | 0.715418752 | 1.34E-05    | HSH2D      | -0.752168448 | 1.33E-07    |
| GNPDA1     | 0.71522927  | 6.20E-21    | GPR132     | -0.752723007 | 0.049522251 |
| PHB        | 0.714165409 | 1.40E-54    | PROB1      | -0.752767715 | 0.001143458 |
| AC022966.1 | 0.712506798 | 9.21E-29    | SLC31A2    | -0.752972379 | 4.08E-09    |
| COA7       | 0.712484937 | 1.12E-23    | ORAI3      | -0.753131761 | 1.34E-08    |
| THAP2      | 0.710757278 | 0.002949135 | ZNF396     | -0.753200837 | 0.017705786 |
| TOMM5      | 0.710733547 | 2.14E-26    | LPXN       | -0.753810875 | 0.048371388 |
| STC2       | 0.710715154 | 2.11E-33    | CCDC9B     | -0.754177844 | 0.030987532 |
| JMJD6      | 0.709972297 | 8.11E-18    | TCEAL3     | -0.754269538 | 9.86E-16    |
| POP7       | 0.709958338 | 2.90E-31    | TOX2       | -0.755074503 | 0.022400592 |
| RPL23AP82  | 0.709752552 | 6.78E-09    | HEG1       | -0.755372006 | 0.000666111 |
| PEX5       | 0.709226656 | 9.06E-27    | TRGV9      | -0.755632732 | 0.000215299 |
| EIF1AX     | 0.708927723 | 5.97E-39    | PRX        | -0.756078661 | 0.000957401 |
| TRMT1      | 0.708110319 | 3.62E-28    | MB         | -0.756431926 | 1.36E-08    |
| MRPL36     | 0.707608835 | 4.27E-24    | LDLRAD4    | -0.756553382 | 9.17E-10    |
| EFHD2      | 0.707592882 | 2.85E-25    | ADSS1      | -0.756825926 | 1.92E-07    |

|         |             |             |            |              |             |
|---------|-------------|-------------|------------|--------------|-------------|
| PWP1    | 0.707194252 | 2.63E-31    | MBOAT1     | -0.756948421 | 3.68E-10    |
| SMAD6   | 0.705149935 | 9.88E-07    | CLU        | -0.756951225 | 1.27E-59    |
| UBIAD1  | 0.704421954 | 2.92E-16    | FAM167A    | -0.756966054 | 0.000629052 |
| TRNP1   | 0.703897086 | 4.24E-06    | EMID1      | -0.757425587 | 2.33E-06    |
| ARL6    | 0.703095749 | 2.91E-06    | LRRC56     | -0.757773383 | 0.002639825 |
| SMG1P2  | 0.702610491 | 4.95E-09    | LINC01137  | -0.758318156 | 0.015754245 |
| IPO5    | 0.70230032  | 5.36E-44    | RAP1GAP    | -0.758859174 | 6.69E-13    |
| CLUH    | 0.701892693 | 4.76E-33    | UGT1A6     | -0.759279199 | 4.04E-08    |
| TAMM41  | 0.699450559 | 3.06E-12    | LINC01503  | -0.759709195 | 0.000703015 |
| NME1    | 0.698966608 | 1.78E-38    | KRT8       | -0.760119352 | 2.42E-34    |
| MTHFD1L | 0.698456571 | 3.07E-41    | EPHA4      | -0.760234734 | 5.35E-13    |
| REXO2   | 0.698110291 | 1.11E-11    | PRICKLE2   | -0.760277859 | 0.00665984  |
| IFRD2   | 0.696929262 | 9.72E-36    | ITGA7      | -0.76057162  | 0.005551066 |
| CSPG5   | 0.696907603 | 0.020384418 | RTN2       | -0.760779583 | 0.007751881 |
| CACYBP  | 0.696616027 | 2.17E-31    | IRS2       | -0.762406565 | 1.24E-08    |
| TDRD1   | 0.695924884 | 3.33E-14    | TNFAIP8L1  | -0.762428099 | 0.00024482  |
| CRACR2A | 0.693043304 | 0.000305841 | ADGRA2     | -0.762566254 | 0.004548434 |
| FAM222A | 0.692932745 | 2.16E-12    | LOXL2      | -0.762641184 | 1.64E-07    |
| AMD1    | 0.692905499 | 5.97E-41    | MST1       | -0.763296295 | 0.010052429 |
| EXOSC5  | 0.692063059 | 5.87E-21    | CASTOR3    | -0.763635781 | 1.97E-10    |
| FAM136A | 0.69194404  | 9.99E-42    | AC139099.1 | -0.76369449  | 0.00581445  |
| TOMM40  | 0.689950637 | 3.33E-43    | SCARA3     | -0.763966916 | 3.63E-17    |
| CEBPZ   | 0.689786154 | 1.78E-31    | IER3       | -0.764346074 | 0.008509454 |
| UTP25   | 0.689703446 | 5.69E-17    | ANXA6      | -0.764562747 | 4.67E-31    |
| SLC7A6  | 0.688977929 | 7.01E-18    | TMEM198    | -0.765694304 | 0.020441502 |
| RSAD1   | 0.688263354 | 2.39E-29    | MAP2       | -0.765849962 | 0.000325821 |
| TMEM201 | 0.686962312 | 1.04E-15    | CDKN1A     | -0.765969534 | 7.18E-09    |
| PRMT3   | 0.686363449 | 2.41E-19    | CHST3      | -0.766424617 | 0.003721493 |
| HSPA4L  | 0.68636289  | 3.49E-16    | FLT3LG     | -0.766851162 | 0.040904886 |
| TBC1D14 | 0.685560816 | 5.89E-23    | MRPL23-AS1 | -0.766852217 | 0.005782865 |
| MAD2L1  | 0.684919599 | 1.18E-32    | SLC66A3    | -0.767219636 | 3.92E-13    |
| NOL10   | 0.684913307 | 2.04E-28    | IGFBP3     | -0.768678541 | 0.028708204 |
| ACTR3B  | 0.684336724 | 1.39E-14    | NUTM2A     | -0.769087809 | 0.035404454 |
| NAA25   | 0.68399609  | 1.29E-24    | PAPLN      | -0.769230119 | 0.00050395  |
| DKC1    | 0.683946611 | 1.67E-33    | CLSTN3     | -0.770106822 | 4.14E-08    |
| NLE1    | 0.6819368   | 3.42E-14    | CCDC153    | -0.770302388 | 0.002356503 |
| NDC1    | 0.681656865 | 1.98E-25    | LINC00514  | -0.770399334 | 0.008849367 |
| SHISA9  | 0.681641998 | 6.96E-15    | FBXO48     | -0.77040864  | 0.020375685 |
| GPR135  | 0.680676866 | 0.020435896 | AC110285.6 | -0.770485397 | 0.03466857  |
| SLIRP   | 0.680493942 | 1.08E-15    | PSCA       | -0.770685398 | 1.35E-06    |
| PDCD5   | 0.680020132 | 7.62E-25    | OPLAH      | -0.771271569 | 1.82E-05    |
| ANKRD16 | 0.679440807 | 2.03E-06    | IL17RC     | -0.771276175 | 1.37E-17    |
| PA2G4   | 0.678674691 | 1.48E-51    | AC126564.1 | -0.771355238 | 9.53E-06    |
| MEMO1   | 0.67786767  | 1.23E-19    | NBPF4      | -0.771547255 | 7.06E-05    |
| ZNF778  | 0.677230021 | 1.54E-12    | ZNF555     | -0.771558606 | 0.00090212  |
| PGAM5   | 0.676230804 | 8.82E-34    | EPOR       | -0.772103972 | 3.66E-06    |
| NR6A1   | 0.676226851 | 0.001046373 | WBP1       | -0.772194165 | 2.28E-25    |

|             |             |             |            |              |             |
|-------------|-------------|-------------|------------|--------------|-------------|
| MRPS26      | 0.675812805 | 7.66E-25    | FAM47E     | -0.772406526 | 0.006423099 |
| LYRM7       | 0.67546603  | 5.47E-10    | SH3PXD2A   | -0.772838607 | 0.010396251 |
| PRKAR1B     | 0.674755618 | 2.18E-26    | ZNF610     | -0.772969291 | 0.026541533 |
| DANCR       | 0.674388348 | 1.04E-24    | AL139385.1 | -0.773955918 | 0.0199304   |
| RRP12       | 0.672522277 | 8.28E-32    | PYROXD2    | -0.774241854 | 1.45E-06    |
| SRXN1       | 0.672223226 | 2.82E-24    | USH1G      | -0.774482591 | 1.07E-05    |
| FAM210A     | 0.672056795 | 1.32E-18    | PPP1R18    | -0.775621162 | 9.43E-13    |
| SLC5A3      | 0.671988738 | 1.59E-16    | CACNG4     | -0.775657278 | 7.90E-18    |
| IL15RA      | 0.670707119 | 1.01E-06    | GPX3       | -0.77568785  | 1.41E-07    |
| ATP11C      | 0.67063192  | 5.02E-23    | EHD2       | -0.776167779 | 3.29E-05    |
| TEAD4       | 0.670097971 | 1.17E-13    | KLF6       | -0.776377152 | 1.20E-11    |
| EIF3B       | 0.669926196 | 1.81E-50    | ADAMTSL5   | -0.776664876 | 6.15E-05    |
| RRP15       | 0.669646465 | 1.17E-14    | FGF12      | -0.776916214 | 0.00516551  |
| ZNF598      | 0.669579201 | 9.59E-34    | ARSD       | -0.776976641 | 1.98E-24    |
| UNKL        | 0.669474676 | 3.23E-15    | LMNTD2-AS1 | -0.778337979 | 0.002544187 |
| DTX4        | 0.669135995 | 5.40E-09    | CLDN9      | -0.779242439 | 1.07E-11    |
| CAD         | 0.669107005 | 1.08E-24    | WNT4       | -0.779254322 | 0.026731554 |
| LARP4       | 0.669080435 | 2.78E-36    | DNAJC4     | -0.779834108 | 5.54E-12    |
| GLB1L2      | 0.668859002 | 3.86E-14    | GMPR       | -0.780011375 | 0.003749388 |
| NEIL2       | 0.668179799 | 6.61E-06    | UBA7       | -0.780565678 | 7.04E-07    |
| MTFMT       | 0.667806801 | 3.80E-12    | AC079414.2 | -0.780624079 | 0.01642161  |
| POP1        | 0.66780153  | 3.48E-24    | MAGI2      | -0.781194158 | 0.001949409 |
| ABCE1       | 0.667656095 | 1.97E-37    | LINC01569  | -0.781783217 | 0.001321259 |
| DLAT        | 0.666858465 | 4.31E-26    | PAQR7      | -0.782201022 | 0.000379669 |
| IL27RA      | 0.66590957  | 3.31E-13    | TTYH3      | -0.782441582 | 2.91E-18    |
| GTPBP3      | 0.665839566 | 1.21E-16    | SGMS1-AS1  | -0.782488257 | 0.004580459 |
| PCGF1       | 0.665479007 | 2.14E-11    | TMC4       | -0.78289845  | 9.99E-17    |
| MRPS6       | 0.664566026 | 9.27E-20    | AC022034.1 | -0.784407319 | 0.000243437 |
| PPAN-P2RY11 | 0.664173227 | 0.001146879 | BTG1       | -0.785565868 | 6.10E-38    |
| AK4         | 0.664085782 | 2.99E-16    | OPTN       | -0.786525202 | 5.43E-19    |
| LRRCS8      | 0.662153894 | 1.51E-33    | GSTM4      | -0.786562641 | 1.68E-16    |
| AC105339.2  | 0.661260648 | 0.033420199 | RNF223     | -0.787041879 | 0.000417988 |
| LRRCS9      | 0.66074248  | 2.66E-42    | TMEM40     | -0.787235428 | 0.000135403 |
| RBM19       | 0.659644873 | 5.19E-24    | CMYA5      | -0.787275738 | 6.69E-07    |
| BYSL        | 0.659484153 | 2.52E-24    | RRAS       | -0.787375323 | 3.28E-09    |
| ZNF593      | 0.659192392 | 1.67E-11    | FMN1       | -0.787534877 | 3.25E-06    |
| COQ3        | 0.658938979 | 5.07E-09    | LTBP2      | -0.787647891 | 0.00090529  |
| SETDB2      | 0.658003397 | 2.09E-05    | TM7SF2     | -0.78783865  | 3.69E-29    |
| TATDN2      | 0.65784983  | 1.76E-26    | KIFC3      | -0.788082593 | 2.24E-11    |
| TSEN2       | 0.657562669 | 1.02E-16    | LINC00461  | -0.788461231 | 0.030653274 |
| ISCA1       | 0.657372473 | 3.92E-21    | AP001816.1 | -0.788628121 | 6.71E-09    |
| UCHL5       | 0.656896368 | 9.06E-27    | AMOT       | -0.788728356 | 0.038763417 |
| GPR63       | 0.654342078 | 0.026923528 | FUT8-AS1   | -0.790539352 | 0.037828589 |
| METTL5      | 0.654135034 | 1.99E-16    | DDX60      | -0.790897286 | 1.89E-09    |
| CHCHD10     | 0.654022072 | 4.31E-13    | CCDC170    | -0.791385765 | 0.000703467 |
| SPHK1       | 0.653922816 | 4.17E-18    | FBXO41     | -0.791807878 | 0.001575833 |
| TSR1        | 0.653833316 | 4.56E-39    | IRF7       | -0.792011642 | 1.03E-08    |

|          |             |             |            |              |             |
|----------|-------------|-------------|------------|--------------|-------------|
| DESI1    | 0.653576224 | 7.50E-25    | SEMA3C     | -0.793574855 | 3.08E-35    |
| MRPL1    | 0.653168469 | 3.39E-17    | SLC2A10    | -0.793888998 | 8.91E-23    |
| FUT10    | 0.652687535 | 0.000382503 | EDIL3      | -0.793920861 | 1.02E-07    |
| TBRG4    | 0.652205983 | 1.86E-28    | ZSWIM4     | -0.794085774 | 0.000205466 |
| YBX3     | 0.651663624 | 3.48E-43    | FAM110C    | -0.794717593 | 7.89E-19    |
| OAF      | 0.651585818 | 2.65E-07    | ADCY5      | -0.795372462 | 4.06E-07    |
| ID2      | 0.651056533 | 9.88E-08    | PLXND1     | -0.795434792 | 4.63E-22    |
| KANK1    | 0.650149372 | 9.40E-12    | PLEKHA6    | -0.796289347 | 6.74E-20    |
| KAT2A    | 0.649935355 | 2.62E-24    | BTN2A2     | -0.796435736 | 0.000112086 |
| COX10    | 0.649825093 | 1.59E-09    | PDGFB      | -0.79777257  | 1.59E-11    |
| RCL1     | 0.647504157 | 4.33E-13    | LOXL1-AS1  | -0.797948328 | 0.005503294 |
| CLNS1A   | 0.647058387 | 4.00E-30    | DUSP10     | -0.798418836 | 0.002409115 |
| SIX1     | 0.646599258 | 1.51E-08    | SDCBP2     | -0.79943072  | 0.037202602 |
| NOL8     | 0.646531076 | 2.38E-26    | CMTM3      | -0.799572787 | 0.025254715 |
| MRPL4    | 0.646005311 | 3.76E-33    | KRT81      | -0.800761387 | 3.09E-49    |
| EBNA1BP2 | 0.645556353 | 2.52E-30    | GSTM2      | -0.802363223 | 0.019682676 |
| NSUN2    | 0.64554078  | 2.38E-37    | AC079848.1 | -0.802798488 | 0.011184355 |
| SELENOI  | 0.64537985  | 7.50E-24    | GFRA1      | -0.802965309 | 0.002403961 |
| SPATA5L1 | 0.645080593 | 4.95E-07    | PRRT3      | -0.803740795 | 1.53E-18    |
| ATAD3A   | 0.644924087 | 1.70E-17    | PLA2G10    | -0.803901235 | 0.003766232 |
| KLF16    | 0.644922279 | 9.06E-18    | UPP1       | -0.803964318 | 5.22E-06    |
| TMEM33   | 0.643289182 | 6.44E-22    | SARDH      | -0.805164829 | 0.014330434 |
| KDM2B    | 0.642381152 | 8.21E-24    | TXNIP      | -0.805426489 | 4.37E-57    |
| EIF5A    | 0.64183286  | 4.23E-48    | MYOF       | -0.805734776 | 1.01E-54    |
| ALDH1B1  | 0.641526638 | 8.07E-16    | ENTPD2     | -0.806152839 | 0.006597109 |
| CDK8     | 0.641227845 | 2.99E-16    | H2AC13     | -0.807129558 | 0.010143263 |
| SNHG17   | 0.640948807 | 1.50E-14    | HDAC6      | -0.807640599 | 1.85E-19    |
| RSL24D1  | 0.640135948 | 3.50E-37    | IQCN       | -0.808725254 | 0.048186707 |
| ATXN7L2  | 0.640072215 | 2.47E-07    | SYT10      | -0.809460794 | 3.61E-12    |
| NOCT     | 0.639892259 | 6.24E-06    | RHOB       | -0.809622866 | 9.76E-34    |
| ZNF30    | 0.639687849 | 0.000416248 | TJP3       | -0.809707979 | 6.11E-13    |
| TBC1D30  | 0.639486887 | 7.90E-25    | MAOA       | -0.809917455 | 0.013798134 |
| ME2      | 0.638973023 | 8.25E-13    | PSMG3-AS1  | -0.810180239 | 6.77E-19    |
| NAGPA    | 0.638851835 | 9.24E-12    | LINC01135  | -0.811572742 | 0.025973819 |
| EMC8     | 0.638569294 | 2.14E-22    | TP53INP2   | -0.811876299 | 6.21E-06    |
| RP9P     | 0.637912585 | 1.49E-05    | PTAFR      | -0.811955404 | 0.00481118  |
| ARC      | 0.637355817 | 0.011205026 | H3C6       | -0.81196697  | 9.57E-05    |
| MRM1     | 0.637175438 | 7.61E-07    | AL022069.3 | -0.812958038 | 0.023672705 |
| CBR1     | 0.6353054   | 1.54E-27    | ALS2CL     | -0.81406633  | 8.56E-08    |
| POLR3E   | 0.633968854 | 3.00E-24    | MX1        | -0.81563036  | 0.003531459 |
| LINGO1   | 0.633767421 | 5.71E-05    | AC021066.1 | -0.815734342 | 8.33E-35    |
| THUMPD2  | 0.632834521 | 1.57E-06    | NEDD9      | -0.817081303 | 1.91E-06    |
| SKA3     | 0.63230629  | 7.78E-21    | BAALC-AS1  | -0.817107942 | 0.003653395 |
| IKZF5    | 0.630870913 | 4.22E-13    | PLA2G4C    | -0.81755041  | 0.00104919  |
| KBTBD8   | 0.630448143 | 2.84E-05    | ESR1       | -0.818183825 | 8.70E-07    |
| URB2     | 0.629812688 | 5.59E-16    | SFXN5      | -0.818350988 | 3.16E-10    |
| ABCF2_2  | 0.628624907 | 6.21E-31    | AL109918.1 | -0.820590998 | 0.000449557 |

|            |             |             |            |              |             |
|------------|-------------|-------------|------------|--------------|-------------|
| SUV39H2    | 0.628441635 | 3.83E-17    | SLC16A4    | -0.820939621 | 0.030051271 |
| ALKBH2     | 0.628439093 | 5.09E-15    | STX1B      | -0.821644469 | 0.010184143 |
| GNL3       | 0.627891889 | 5.21E-31    | NTN4       | -0.821869219 | 0.001761234 |
| RINL       | 0.627411568 | 0.013416366 | RAI2       | -0.822021885 | 0.027487525 |
| WDR77      | 0.627174645 | 3.64E-28    | ZG16B      | -0.822705507 | 3.05E-11    |
| NAA15      | 0.626973137 | 2.16E-31    | MID1       | -0.822822269 | 9.59E-21    |
| NXT1       | 0.626577404 | 3.55E-13    | CYP4F11    | -0.823045335 | 0.006315896 |
| AATF       | 0.625790992 | 5.26E-22    | Z97634.1   | -0.823189479 | 0.014794489 |
| SNAPC4     | 0.625714539 | 1.74E-17    | GLDN       | -0.823338265 | 0.009080118 |
| UBE2S      | 0.625631806 | 3.63E-27    | SSPO       | -0.823501385 | 0.003847075 |
| UTP15      | 0.625424244 | 2.56E-16    | ZNF599     | -0.823618594 | 0.012545643 |
| AC027228.2 | 0.624963193 | 2.76E-05    | STARD13    | -0.82398334  | 4.72E-06    |
| MRPL3      | 0.624436867 | 7.66E-34    | IL17RD     | -0.824039671 | 0.030395553 |
| NUDCD1     | 0.62441637  | 2.38E-30    | LINC02732  | -0.826150057 | 1.26E-10    |
| CFAP157    | 0.624124431 | 0.021664837 | AC015712.6 | -0.827662048 | 7.38E-11    |
| FP565260.3 | 0.6239515   | 0.0004123   | HTR7P1     | -0.827794693 | 4.36E-05    |
| RFK        | 0.623804365 | 2.51E-21    | KRT7       | -0.828883515 | 5.29E-24    |
| TFAM       | 0.623307174 | 1.45E-27    | AMPD3      | -0.829084924 | 0.036126793 |
| NIFK       | 0.622533342 | 2.06E-21    | PBXIP1     | -0.829238903 | 4.64E-21    |
| SMAD1      | 0.622442563 | 4.05E-10    | MEGF6      | -0.830056906 | 8.21E-19    |
| TRMT5      | 0.621321138 | 3.38E-16    | C8orf58    | -0.830337758 | 8.94E-08    |
| GCFC2      | 0.620535994 | 4.67E-09    | LMO7       | -0.830339422 | 2.44E-26    |
| MNX1-AS1   | 0.620392718 | 4.14E-05    | CCDC69     | -0.830366803 | 0.00132017  |
| OXNAD1     | 0.619735564 | 3.29E-09    | RAB11B-AS1 | -0.830418892 | 0.026542754 |
| WDR75      | 0.619632276 | 8.79E-21    | ABTB1      | -0.830673977 | 5.51E-09    |
| MRPS25     | 0.619072199 | 1.98E-26    | RIMKLA     | -0.83082357  | 0.024169049 |
| AL359922.1 | 0.61762421  | 0.047021199 | PADI1      | -0.830824967 | 0.034729747 |
| GPATCH4    | 0.616168421 | 2.14E-20    | GPRASP1    | -0.830983417 | 0.009766763 |
| COLGALT1   | 0.61612888  | 1.54E-30    | HIVEP3     | -0.831168068 | 6.81E-06    |
| FAM162A    | 0.615583627 | 1.82E-12    | KCNAB3     | -0.831827074 | 0.043237448 |
| POLG2      | 0.615516299 | 4.05E-14    | CLGN       | -0.832321692 | 0.02723187  |
| CCDC138    | 0.615458677 | 1.80E-06    | IRF9       | -0.832333003 | 6.51E-20    |
| FKBP7      | 0.614600308 | 0.038440008 | RPS6KA2    | -0.832459449 | 2.11E-07    |
| OTUD6B     | 0.614542666 | 1.83E-16    | TIMP2      | -0.832973783 | 1.42E-21    |
| DDX51      | 0.613802785 | 2.55E-10    | SNX33      | -0.833081538 | 2.57E-06    |
| ZNF695     | 0.613625685 | 0.008497997 | SCN1B      | -0.833307932 | 0.001204186 |
| NUP35      | 0.613160708 | 8.46E-11    | FAXDC2     | -0.834196098 | 0.038440008 |
| MTRR       | 0.612763962 | 1.86E-15    | BCAM       | -0.834539085 | 7.44E-19    |
| NCLN       | 0.612172523 | 3.32E-20    | PPL        | -0.834734238 | 2.83E-55    |
| B4GALT5    | 0.612155641 | 2.34E-25    | CCDC159    | -0.834791576 | 4.16E-05    |
| ZNF511     | 0.612064791 | 6.73E-14    | SAMD9      | -0.835084133 | 8.58E-19    |
| SNHG15     | 0.611675326 | 7.02E-06    | ITGB4      | -0.835736144 | 1.07E-30    |
| XPO4       | 0.611452158 | 4.39E-12    | IFI6       | -0.835971518 | 2.29E-05    |
| JADE1      | 0.611128648 | 4.59E-13    | MAPK11     | -0.836257441 | 2.77E-12    |
| SH2D5      | 0.610672516 | 0.021356289 | AC068580.3 | -0.836274152 | 0.005573908 |
| RAI14      | 0.61058517  | 6.37E-12    | CAMK2N2    | -0.838628792 | 4.22E-05    |
| POLR3D     | 0.610446289 | 1.91E-14    | SLC25A42   | -0.839058633 | 1.49E-08    |



|         |             |             |            |              |             |
|---------|-------------|-------------|------------|--------------|-------------|
| NDUFAF5 | 0.610331573 | 7.34E-08    | FAR2       | -0.839128366 | 0.042952522 |
| TOMM34  | 0.61032017  | 3.44E-26    | HLA-DRB5   | -0.839594644 | 0.005530151 |
| APIP    | 0.610174761 | 2.67E-09    | LNCOC1     | -0.839757456 | 0.019415318 |
| DDX39A  | 0.60977119  | 2.91E-36    | TMEM125    | -0.839920065 | 9.71E-08    |
| ARHGEF4 | 0.609589319 | 0.008165741 | SYTL4      | -0.840647068 | 0.000110573 |
| MRPS23  | 0.609536967 | 3.67E-26    | NOX5       | -0.84179546  | 0.018168319 |
| PPT2    | 0.60945226  | 3.09E-10    | ALPK3      | -0.842125421 | 2.69E-07    |
| FAIM    | 0.609042836 | 5.99E-08    | CCN5       | -0.842592943 | 1.83E-14    |
| EBPL    | 0.608867813 | 1.74E-16    | MRAS       | -0.843441358 | 0.01318507  |
| CHD1    | 0.608712351 | 2.24E-23    | SOWAHB     | -0.843659842 | 3.43E-06    |
| TRIP13  | 0.608035103 | 9.03E-18    | DCDC2      | -0.845013858 | 3.96E-23    |
| PTRH2   | 0.607053867 | 1.92E-23    | LINC02015  | -0.845078592 | 0.001380928 |
| UBE2O   | 0.606951612 | 2.32E-20    | MAB21L4    | -0.845353567 | 2.02E-10    |
| CCDC137 | 0.606421232 | 2.15E-20    | RAB43      | -0.845425501 | 0.01247616  |
| YARS2   | 0.605958263 | 2.35E-10    | ARRDC3     | -0.846438922 | 3.66E-06    |
| ZNF587B | 0.605922499 | 1.48E-06    | MYO7A      | -0.846449425 | 0.027371772 |
| HSPBAP1 | 0.605699656 | 0.000570686 | PLEK2      | -0.846877973 | 0.000688518 |
| MCRIP2  | 0.605671812 | 1.72E-13    | CCNG2      | -0.847002553 | 2.43E-21    |
| ZNF330  | 0.605543751 | 9.56E-18    | TSHZ3      | -0.850195786 | 0.000488337 |
| ALKBH8  | 0.604334849 | 6.81E-08    | ATP6V1B1   | -0.851515993 | 0.032528897 |
| MRPS17  | 0.604170192 | 1.10E-07    | SHISA2     | -0.852110975 | 0.001624779 |
| ETS2    | 0.60387076  | 2.07E-10    | LEPR       | -0.854507704 | 0.044379636 |
| DDX31   | 0.603771679 | 8.34E-17    | IQCD       | -0.85484047  | 0.001620622 |
| TMEM70  | 0.603764211 | 6.70E-15    | B4GALT1    | -0.855516074 | 7.46E-11    |
| F12     | 0.603603443 | 4.29E-12    | AL021392.1 | -0.855716916 | 0.036065899 |
| ATP13A3 | 0.603372106 | 1.03E-23    | RARA       | -0.855922004 | 6.48E-05    |
| MCAT    | 0.603221446 | 6.05E-15    | BMERB1     | -0.857534247 | 8.06E-05    |
| DCAF1   | 0.602936096 | 1.97E-16    | TMEM229B   | -0.858915557 | 4.73E-12    |
| NAT10   | 0.602864537 | 1.17E-27    | GRIN2D     | -0.859149111 | 0.000191222 |
| ZDHHC18 | 0.602295898 | 3.70E-15    | LINC01963  | -0.859905826 | 0.000291568 |
| CDCA7L  | 0.602155215 | 3.41E-13    | FER1L4     | -0.860908317 | 9.61E-07    |
| STK26   | 0.601948194 | 3.88E-23    | COL6A2     | -0.861510285 | 0.000243889 |
| MRPL14  | 0.601683415 | 3.97E-23    | TUBB8P7    | -0.861969001 | 0.02291124  |
| NPIPB12 | 0.601571829 | 1.09E-07    | APAF1      | -0.862631124 | 2.85E-07    |
| EIF5    | 0.601472548 | 2.15E-30    | A4GALT     | -0.862643905 | 0.019161368 |
| AK2     | 0.601366212 | 4.00E-32    | PCDHA12    | -0.862737218 | 0.014808228 |
| NETO2   | 0.600818694 | 1.23E-21    | PADI2      | -0.863453608 | 0.004699916 |
| ANKRD27 | 0.600717838 | 2.10E-25    | VSIR       | -0.864071819 | 0.013648696 |
| MGST1   | 0.600377194 | 1.03E-20    | ATP2A3     | -0.864403163 | 1.89E-53    |
| BAZ1A   | 0.599802249 | 7.73E-35    | F3         | -0.864471639 | 0.000103256 |
| TIMM13  | 0.599790137 | 2.61E-13    | AC144831.1 | -0.865045614 | 3.62E-05    |
| IMP3    | 0.599374341 | 5.18E-19    | KREMEN1    | -0.86506355  | 8.34E-09    |
| NAA50   | 0.599287118 | 3.04E-37    | FAT4       | -0.865063784 | 7.47E-05    |
| SHLD2   | 0.599060178 | 6.17E-19    | ELFN1      | -0.865329176 | 1.42E-05    |
| ADGRL1  | 0.59900817  | 3.99E-28    | PPM1K      | -0.866103286 | 0.018908518 |
| NFIA    | 0.599005882 | 9.72E-07    | SRR        | -0.866624624 | 7.29E-09    |
| NOP58   | 0.598833214 | 1.36E-28    | LDB3       | -0.867851854 | 0.013222972 |

|            |             |             |            |              |             |
|------------|-------------|-------------|------------|--------------|-------------|
| GALK2      | 0.598269049 | 1.74E-08    | LOXL1      | -0.868370717 | 0.036123142 |
| NOM1       | 0.598167276 | 6.07E-23    | TNFAIP2    | -0.869374633 | 0.000329097 |
| LRFN4      | 0.598069154 | 9.65E-24    | NHS        | -0.869753624 | 1.28E-12    |
| QTRT2      | 0.598060822 | 1.55E-22    | SLC22A18   | -0.870006811 | 5.35E-11    |
| NUS1       | 0.597735553 | 1.80E-25    | ESPN       | -0.870547014 | 3.48E-17    |
| SMIM13     | 0.597546746 | 5.66E-11    | CORO1A     | -0.87313455  | 5.18E-14    |
| B4GALT3    | 0.59731909  | 4.93E-16    | MT1F       | -0.874046476 | 0.008563142 |
| ENOPH1     | 0.59728863  | 2.03E-24    | FAM114A1   | -0.875568612 | 7.12E-06    |
| TIMM22     | 0.597179341 | 4.19E-14    | AL670729.3 | -0.875626194 | 0.021514485 |
| KDM1A      | 0.595978452 | 3.72E-27    | EFR3B      | -0.875660566 | 0.000539962 |
| RIPK2      | 0.595861574 | 9.79E-14    | NOXA1      | -0.875689436 | 1.59E-08    |
| TFRC       | 0.595748186 | 2.75E-35    | LAMB3      | -0.875709346 | 2.11E-06    |
| CUL4A      | 0.595725539 | 8.88E-25    | DDX60L     | -0.876639944 | 0.000124277 |
| RRN3       | 0.595692459 | 7.16E-26    | TTLL7      | -0.876691894 | 0.023023146 |
| XPO6       | 0.594213794 | 5.48E-32    | SBK1       | -0.877592791 | 4.95E-07    |
| TRMU       | 0.593742454 | 7.01E-18    | SLC4A3     | -0.879108364 | 0.001345417 |
| AC068547.1 | 0.593526105 | 2.00E-05    | ARHGAP33   | -0.88007469  | 7.79E-10    |
| SNRPD1     | 0.593028966 | 3.15E-22    | PIP5KL1    | -0.881098512 | 0.005214447 |
| FAM72A     | 0.592547081 | 1.96E-07    | AC144450.1 | -0.881269476 | 0.000577247 |
| UTP6       | 0.592492886 | 1.98E-15    | XBP1       | -0.881308006 | 0.000969922 |
| CCDC85C    | 0.591685904 | 2.77E-27    | MAST4      | -0.883462946 | 1.51E-27    |
| DBF4       | 0.59165275  | 8.75E-23    | TCHH       | -0.884655032 | 0.01013653  |
| RELT       | 0.59125709  | 3.31E-08    | CPHL1P     | -0.885097084 | 0.04093286  |
| TRIM65     | 0.590566585 | 9.12E-18    | FRMD4B     | -0.885443687 | 1.09E-06    |
| NME1-NME2  | 0.590408373 | 0.000775985 | AC015802.6 | -0.885589564 | 0.004121639 |
| METAP2     | 0.590303324 | 1.88E-23    | HSPB8      | -0.886056406 | 0.000299315 |
| KARS1      | 0.589553778 | 6.60E-40    | MARCKS     | -0.886853645 | 9.96E-09    |
| AC113189.4 | 0.588986664 | 0.02362539  | APCDD1     | -0.887353436 | 0.00038554  |
| RNF126     | 0.588946497 | 1.24E-15    | TUBB3      | -0.887913661 | 1.95E-26    |
| NAMPT      | 0.588406667 | 2.49E-31    | VPS37D     | -0.888249903 | 0.001949664 |
| TNPO2      | 0.588363355 | 7.78E-28    | SPEF1      | -0.889025939 | 0.041604725 |
| WDR36      | 0.588344366 | 2.19E-17    | C14orf132  | -0.889159151 | 0.00103081  |
| INTS10     | 0.588291199 | 5.87E-17    | TUBA1A     | -0.889228586 | 4.67E-23    |
| PRPS1      | 0.588195336 | 1.04E-23    | SOCS1      | -0.889532276 | 0.002597811 |
| GPT2       | 0.588187036 | 5.19E-22    | TAT        | -0.892097855 | 0.028085817 |
| TSFM       | 0.587517147 | 5.47E-18    | BTC        | -0.892154176 | 8.38E-07    |
| TENT4B     | 0.586791404 | 2.78E-10    | STEAP4     | -0.892786021 | 5.92E-05    |
| MRPL15     | 0.586742728 | 1.10E-17    | TFAP2A-AS1 | -0.894921851 | 0.040227528 |
| ATP1B3     | 0.586625847 | 4.91E-24    | AC099343.4 | -0.895145042 | 0.015036351 |
| GART       | 0.585354871 | 1.13E-30    | PRR36      | -0.89516714  | 0.002618507 |
|            |             |             | ALOX15     | -0.895619016 | 1.46E-13    |
|            |             |             | COL5A2     | -0.896770474 | 5.48E-05    |
|            |             |             | RAB4B      | -0.896860123 | 2.25E-06    |
|            |             |             | CEACAM5    | -0.897748252 | 1.55E-05    |
|            |             |             | IGFBP5     | -0.897769122 | 6.99E-33    |
|            |             |             | PXDC1      | -0.89890327  | 2.10E-06    |
|            |             |             | ITGA5      | -0.899098173 | 4.38E-12    |

|            |              |             |
|------------|--------------|-------------|
| SCNN1A     | -0.89930545  | 0.016447154 |
| RAP2C-AS1  | -0.899457702 | 0.006347046 |
| NES        | -0.907119437 | 7.50E-05    |
| KRT19      | -0.907144891 | 7.24E-45    |
| ZNF185     | -0.907466832 | 1.53E-28    |
| ST8SIA6    | -0.908799223 | 0.002225865 |
| RASD1      | -0.910110453 | 0.011682666 |
| POLD4      | -0.910119702 | 4.13E-14    |
| TMEM45B    | -0.910662938 | 1.41E-10    |
| SCIN       | -0.911223324 | 0.010649133 |
| MKRN2OS    | -0.911456062 | 0.030987532 |
| CTSD       | -0.911553532 | 3.62E-07    |
| TGM1       | -0.911560981 | 2.16E-09    |
| AFAP1L2    | -0.913352668 | 4.53E-06    |
| NEURL1B    | -0.913437015 | 9.30E-20    |
| LRRC46     | -0.91645566  | 0.002289924 |
| ABCA4      | -0.91689467  | 0.000333493 |
| CNTNAP1    | -0.917252594 | 0.026000291 |
| SPATA6     | -0.917669096 | 0.006005605 |
| HMOX1      | -0.91823255  | 0.000267028 |
| SLFN5      | -0.91884027  | 1.30E-09    |
| C19orf33   | -0.919487621 | 4.72E-11    |
| PAPSS2     | -0.920168926 | 5.62E-50    |
| AL031123.3 | -0.921693992 | 0.035843553 |
| MICAL1     | -0.922077579 | 7.60E-14    |
| NATD1      | -0.922314625 | 2.23E-08    |
| PLA2G6     | -0.922499075 | 4.07E-07    |
| TENT5B     | -0.923333853 | 0.001020286 |
| TGFBR2     | -0.925346913 | 3.14E-06    |
| TNFSF15    | -0.92714817  | 4.21E-07    |
| MIR210HG   | -0.927631678 | 0.000880424 |
| ZNF365     | -0.927758561 | 0.000156384 |
| ANKRD6     | -0.928236186 | 0.001929136 |
| AC006372.1 | -0.929815072 | 0.025823332 |
| IGFBP4     | -0.929961853 | 0.015212964 |
| COL12A1    | -0.930340507 | 5.06E-09    |
| HIPK1-AS1  | -0.930398405 | 0.02454828  |
| APH1B      | -0.932146126 | 0.000102133 |
| SYTL2      | -0.932349201 | 4.69E-69    |
| LGALS1     | -0.933914424 | 1.52E-26    |
| ABCA7      | -0.934140771 | 4.27E-09    |
| CATSPERG   | -0.934725535 | 0.006350276 |
| CCDC96     | -0.934943561 | 0.003440927 |
| LINC00885  | -0.936047571 | 0.007344663 |
| NRCAM      | -0.936961508 | 8.71E-32    |
| PCDHAC2    | -0.936969893 | 0.000375259 |
| ZIC4       | -0.937840779 | 9.40E-05    |

|            |              |             |
|------------|--------------|-------------|
| NAV2       | -0.938627125 | 1.36E-05    |
| GPC2       | -0.943179638 | 0.011444855 |
| DDAH2      | -0.946126132 | 4.09E-17    |
| EPGN       | -0.947255487 | 0.003354853 |
| UNC5A      | -0.948164384 | 0.006318087 |
| MUC20      | -0.949197183 | 2.34E-12    |
| ITGA2      | -0.949298106 | 1.98E-26    |
| THSD4      | -0.949925702 | 3.65E-14    |
| CYP26B1    | -0.950745335 | 0.000743853 |
| AC245297.1 | -0.952202386 | 0.011671937 |
| AC131649.2 | -0.954238654 | 0.010462853 |
| RBM11      | -0.956278834 | 0.005168278 |
| CFAP206    | -0.956410885 | 0.001116629 |
| RNF224     | -0.956486041 | 0.000100294 |
| MATN3      | -0.957722901 | 6.01E-05    |
| KLF8       | -0.959313325 | 0.00660486  |
| LRRC75A    | -0.960057692 | 0.000607584 |
| PLEKHG2    | -0.960832361 | 5.98E-21    |
| C1QTNF6    | -0.961066861 | 6.94E-73    |
| THBS1      | -0.96183383  | 2.75E-29    |
| GPRC5A     | -0.962604378 | 8.93E-61    |
| CLCF1      | -0.964839951 | 1.27E-06    |
| COL5A1     | -0.964890541 | 2.34E-29    |
| DKK1       | -0.965106694 | 6.59E-24    |
| GGT6       | -0.965125294 | 1.12E-11    |
| SLC22A17   | -0.965287804 | 0.000212299 |
| SLC16A2    | -0.967937295 | 3.24E-05    |
| FRK        | -0.969163922 | 0.000463501 |
| CCM2L      | -0.969907506 | 0.004418907 |
| CCN2       | -0.970509163 | 0.000550326 |
| GRIK3      | -0.970577844 | 0.015950171 |
| CLDN1      | -0.970677378 | 1.98E-15    |
| FILIP1L    | -0.971402588 | 0.00033001  |
| LMO2       | -0.973674471 | 0.000457058 |
| PLEKHG1    | -0.973697891 | 0.005027543 |
| GYG2       | -0.974273811 | 0.002844995 |
| KIAA1210   | -0.974522723 | 0.000692469 |
| KIAA1324   | -0.97559232  | 9.72E-27    |
| PLAAT4     | -0.975654817 | 0.010197497 |
| MYPN       | -0.975717617 | 1.41E-12    |
| GLRA3      | -0.976222203 | 0.002156324 |
| WNT9A      | -0.977039934 | 0.000908026 |
| MGP        | -0.977965158 | 5.31E-16    |
| BEX5       | -0.978170633 | 0.004910045 |
| HDAC11     | -0.978908375 | 9.02E-11    |
| CEACAM6    | -0.981654731 | 1.16E-44    |
| CGNL1      | -0.985409483 | 4.16E-06    |

|              |              |             |
|--------------|--------------|-------------|
| SP2-AS1      | -0.986404505 | 7.04E-05    |
| ZNF175       | -0.987528558 | 2.11E-06    |
| AC092070.2   | -0.9878503   | 0.007175746 |
| SPNS2        | -0.989736402 | 1.75E-05    |
| ITGB2        | -0.989936861 | 0.011636236 |
| MYZAP        | -0.993824444 | 6.75E-08    |
| DNAH7        | -0.996547599 | 0.010094796 |
| RASSF8-AS1   | -0.997448332 | 0.000233073 |
| AGAP11       | -0.997476176 | 0.002638907 |
| CRAT         | -0.999743647 | 1.79E-05    |
| CLIP2        | -1.000375347 | 3.14E-05    |
| MT2A         | -1.002310207 | 0.019641429 |
| DEGS2        | -1.003934734 | 0.011124382 |
| MUC20P1      | -1.00511966  | 0.009712922 |
| MYEOV        | -1.006597408 | 3.42E-26    |
| PRODH        | -1.006908203 | 0.003316981 |
| AOX1         | -1.007387605 | 0.021040369 |
| LRG1         | -1.009739302 | 0.002770209 |
| MSH5-SAPCD1  | -1.010746582 | 0.005499358 |
| FGD3         | -1.011445955 | 2.49E-07    |
| JPH2         | -1.011677544 | 4.67E-24    |
| GDF15        | -1.012707475 | 3.34E-19    |
| SPEG         | -1.013734108 | 1.72E-05    |
| ARHGEF40     | -1.014691298 | 0.002787701 |
| ACKR3        | -1.014748582 | 1.51E-14    |
| ULBP1        | -1.014902551 | 1.65E-06    |
| GMDS-DT      | -1.01563784  | 0.008623212 |
| INPP4B       | -1.015659185 | 1.83E-37    |
| KRT15        | -1.017124601 | 7.80E-14    |
| MMRN2        | -1.017127546 | 0.017757604 |
| PTK6         | -1.017525176 | 1.44E-17    |
| ENTPD3-AS1   | -1.017676746 | 0.002451884 |
| CASTOR1      | -1.02317211  | 0.000753462 |
| AQP3         | -1.023710999 | 3.01E-05    |
| STX16-NPEPL1 | -1.026620349 | 0.00853654  |
| FN1          | -1.027265876 | 3.65E-08    |
| MAFF         | -1.027516361 | 1.42E-06    |
| MICB         | -1.027600662 | 0.000156074 |
| LINC00482    | -1.028147457 | 0.024949091 |
| AP003419.1   | -1.028257478 | 0.00367535  |
| FOS          | -1.029443531 | 6.36E-07    |
| ETNK2        | -1.030430167 | 6.12E-17    |
| MEIS3        | -1.031845616 | 3.09E-10    |
| LHFPL6       | -1.032891031 | 0.010408788 |
| TCIM         | -1.033124138 | 6.39E-10    |
| TMEM8B       | -1.034156251 | 5.23E-05    |
| SLC22A18AS   | -1.034917561 | 0.001026369 |

|            |              |             |
|------------|--------------|-------------|
| TH         | -1.035073958 | 0.00293351  |
| ANOS1      | -1.036088482 | 0.000181106 |
| ZMAT1      | -1.039160434 | 1.24E-05    |
| ABCC3      | -1.040930959 | 1.32E-06    |
| MVP        | -1.042143771 | 7.69E-39    |
| KRT13      | -1.042355605 | 0.001353512 |
| BEST1      | -1.044753746 | 0.000291529 |
| FA2H       | -1.04661145  | 6.42E-06    |
| MYO15B     | -1.050691061 | 3.06E-10    |
| TNFRSF11B  | -1.052095807 | 1.01E-07    |
| SEMA5B     | -1.052159136 | 2.13E-07    |
| CAPN5      | -1.052828695 | 4.54E-23    |
| CALML5     | -1.053000036 | 1.45E-06    |
| APOBEC3F   | -1.053626097 | 0.000299028 |
| BDKRB2     | -1.055586632 | 1.11E-06    |
| VWF        | -1.057718185 | 0.00367246  |
| AL031123.2 | -1.058649766 | 0.000539962 |
| AC110619.1 | -1.058945204 | 7.74E-31    |
| CLIC3      | -1.059088039 | 4.33E-55    |
| GPR39      | -1.066282891 | 0.000241803 |
| MUC1       | -1.067411162 | 7.78E-28    |
| ITGB6      | -1.069663137 | 9.68E-10    |
| DIRC3      | -1.070946983 | 0.002168062 |
| DNAJB5     | -1.071395378 | 9.24E-05    |
| JAG1       | -1.072171983 | 0.002422273 |
| TGFB2      | -1.072183358 | 8.42E-09    |
| GSN        | -1.07325871  | 4.63E-81    |
| LYPD3      | -1.074930732 | 1.66E-28    |
| MIR503HG   | -1.075192531 | 4.92E-13    |
| LIF        | -1.081803293 | 8.56E-14    |
| RIPOR3     | -1.083777183 | 2.66E-11    |
| SUSD2      | -1.08394175  | 1.17E-11    |
| EMP1       | -1.087367828 | 0.000173704 |
| AL157935.2 | -1.088466947 | 0.006606276 |
| LRRC15     | -1.091028486 | 0.001518422 |
| AL158211.5 | -1.094558918 | 0.00014793  |
| MAGED4B    | -1.096464787 | 0.000630182 |
| ZNF750     | -1.096600979 | 1.92E-05    |
| MALRD1     | -1.10244636  | 0.016815272 |
| ABCC13     | -1.103322492 | 0.000423579 |
| ST6GALNAC2 | -1.105298463 | 1.19E-18    |
| DUSP4      | -1.10576258  | 4.08E-12    |
| AMTN       | -1.106736625 | 8.89E-05    |
| DHRS2      | -1.107042051 | 7.38E-13    |
| GRAMD2A    | -1.1084185   | 0.000164905 |
| DGCR9      | -1.110793104 | 0.008074279 |
| SH3TC1     | -1.117052997 | 5.40E-10    |

|             |              |             |
|-------------|--------------|-------------|
| TP53INP1    | -1.11863113  | 5.54E-06    |
| SLC1A2      | -1.120535123 | 3.80E-05    |
| LINC02620   | -1.130800307 | 0.005020231 |
| CAPN9       | -1.139872912 | 7.66E-05    |
| MAFB        | -1.145042248 | 3.29E-05    |
| SNAI2       | -1.147843156 | 7.91E-07    |
| KLF7        | -1.153621509 | 0.000265906 |
| CYSRT1      | -1.154427455 | 1.11E-13    |
| RUNDC3A-AS1 | -1.154780267 | 8.46E-10    |
| CBFA2T3     | -1.15897656  | 0.001405412 |
| NR2F1       | -1.160501052 | 1.31E-08    |
| IFITM10     | -1.161105631 | 7.27E-09    |
| ACTA2       | -1.164308165 | 1.33E-05    |
| SEMA3B      | -1.165338413 | 9.74E-08    |
| TNS1        | -1.166385526 | 6.34E-08    |
| ANKRD24     | -1.166778651 | 0.00265528  |
| INHBA       | -1.168709867 | 6.73E-13    |
| ISG20       | -1.172308671 | 9.75E-07    |
| TRIM29      | -1.180709572 | 8.01E-05    |
| PRSS23      | -1.184859666 | 3.59E-06    |
| LAMC2       | -1.185477746 | 3.07E-18    |
| TIGD3       | -1.186317375 | 0.000506742 |
| AL590004.3  | -1.18688627  | 0.001424549 |
| HMCN1       | -1.187593834 | 1.24E-08    |
| SPOCK1      | -1.189143352 | 1.76E-18    |
| ABCA12      | -1.192185988 | 0.000331633 |
| FOXI1       | -1.197236327 | 5.26E-06    |
| SLC34A3     | -1.199937119 | 0.000177387 |
| BANK1       | -1.200971389 | 4.19E-07    |
| CAPN2       | -1.205008348 | 7.39E-17    |
| ADORA1      | -1.206425389 | 0.001168634 |
| ZNF709      | -1.209920028 | 0.00197716  |
| KLHDC9      | -1.210016583 | 0.000237067 |
| MST1R       | -1.234664761 | 2.33E-08    |
| PRR15       | -1.239670838 | 6.31E-08    |
| PHLDB2      | -1.240962177 | 1.14E-07    |
| AC010735.2  | -1.246154289 | 3.46E-06    |
| STIMATE-    |              |             |
| MUSTN1      | -1.246918174 | 0.000188977 |
| KLK6        | -1.249745678 | 3.53E-05    |
| C9orf152    | -1.251761496 | 6.17E-05    |
| IFI27       | -1.252260188 | 0.000103791 |
| ABAT        | -1.254492326 | 3.54E-51    |
| DOK7        | -1.287210741 | 0.003256135 |
| LDHD        | -1.292397327 | 6.78E-08    |
| PLXNA2      | -1.296941146 | 7.66E-13    |
| ACTG2       | -1.297528785 | 1.16E-05    |

|            |              |             |
|------------|--------------|-------------|
| RET        | -1.300504238 | 0.007734095 |
| SERPINA3   | -1.308871453 | 9.24E-05    |
| SYTL5      | -1.309806811 | 1.37E-06    |
| NT5E       | -1.313115995 | 5.48E-44    |
| AL359258.3 | -1.314995883 | 0.00190009  |
| SLCO2A1    | -1.322100414 | 4.07E-06    |
| ADGRF4     | -1.334900215 | 7.58E-10    |
| CEMIP      | -1.334904026 | 0.032531246 |
| RASGRP1    | -1.340736581 | 4.34E-17    |
| AC008556.1 | -1.354978053 | 1.53E-05    |
| KCNMB1     | -1.356655106 | 1.94E-05    |
| CISH       | -1.362207601 | 0.00690796  |
| KNDC1      | -1.362323601 | 5.83E-05    |
| PAOX       | -1.374332656 | 0.000111863 |
| MALL       | -1.37595949  | 6.68E-47    |
| CYP24A1    | -1.38200716  | 0.000184516 |
| KRT16      | -1.388943724 | 2.51E-17    |
| KRT17      | -1.412793387 | 6.41E-10    |
| AREG       | -1.453935003 | 0.001107915 |
| LINC02747  | -1.482761639 | 0.000415819 |
| PSG9       | -1.485899116 | 2.36E-09    |
| PTGES      | -1.577125601 | 3.83E-05    |
| EGR3       | -2.046502579 | 0.040859521 |



**Table S8:** mRNAs significantly up- or downregulated ( $\geq 1.5$ x fold change) in MCF-7/pRTR-c-MYC cells (*AP4* KO/*p53* -/-).

| Significantly up-regulated mRNAs |                              |           | Significantly down-regulated mRNAs |                              |             |
|----------------------------------|------------------------------|-----------|------------------------------------|------------------------------|-------------|
| Gene symbol                      | Log <sub>2</sub> fold change | padj      | Gene symbol                        | Log <sub>2</sub> fold change | padj        |
| MYC                              | 4.167260266                  | 0         | GADD45B                            | -0.5853533                   | 1.85E-08    |
| AC026786.1                       | 4.124040958                  | 5.17E-239 | NLRX1                              | -0.585709861                 | 2.17E-14    |
| CTRL                             | 3.601294943                  | 9.14E-46  | PCYOX1L                            | -0.585920005                 | 3.58E-11    |
| PDE4A                            | 3.446885938                  | 1.33E-94  | CCDC69                             | -0.585955072                 | 0.003163952 |
| FABP5                            | 3.188506776                  | 3.79E-112 | TSC22D2                            | -0.585961161                 | 1.04E-30    |
| GAL                              | 3.022289043                  | 0         | PI4K2A                             | -0.586362733                 | 4.69E-14    |
| CR2                              | 2.73504122                   | 4.86E-44  | SP2-AS1                            | -0.586726432                 | 0.021529526 |
| HS3ST3B1                         | 2.673459104                  | 8.48E-27  | GSEC                               | -0.58675942                  | 0.000358986 |
| DUSP2                            | 2.5827638                    | 3.24E-71  | TMEM140                            | -0.58680189                  | 1.58E-05    |
| POLR3G                           | 2.551053106                  | 2.92E-253 | TRADD                              | -0.58730785                  | 2.73E-15    |
| PLD6                             | 2.301153868                  | 1.61E-125 | ATP2C2                             | -0.587318979                 | 8.49E-11    |
| TBC1D4                           | 2.205894498                  | 5.40E-200 | ATXN7L1                            | -0.587949727                 | 2.97E-05    |
| SORD                             | 2.189827081                  | 9.41E-68  | ERVK13-1                           | -0.588348351                 | 5.46E-05    |
| HOXC8                            | 2.180284092                  | 5.84E-13  | SHANK2                             | -0.588433595                 | 1.99E-16    |
| KCNQ4                            | 2.15695759                   | 5.08E-19  | TBC1D8                             | -0.588772612                 | 2.26E-13    |
| WNT10B                           | 2.133754824                  | 6.46E-49  | BACE1-AS                           | -0.588872469                 | 0.037903203 |
| CPNE7                            | 2.119732291                  | 5.16E-27  | YPEL2                              | -0.588887105                 | 1.73E-07    |
| TERT                             | 2.112713842                  | 6.38E-12  | MIF4GD                             | -0.589464762                 | 5.46E-12    |
| SLC16A1                          | 2.095697655                  | 0         | KDELRL3                            | -0.589599039                 | 2.60E-07    |
| RAB3IL1                          | 2.011081879                  | 1.86E-85  | SH3BP5                             | -0.589788142                 | 1.70E-66    |
| RNF125                           | 1.981591856                  | 4.14E-56  | AC026471.1                         | -0.589869425                 | 0.000487668 |
| PPARGC1B                         | 1.965141668                  | 7.39E-69  | TPST1                              | -0.589878592                 | 0.000218189 |
| SORD2P                           | 1.849616813                  | 4.79E-12  | NUTM2D                             | -0.590107585                 | 0.002897891 |
| AC007342.4                       | 1.847173942                  | 7.08E-10  | HES1                               | -0.59053327                  | 2.31E-22    |
| AC040162.1                       | 1.834654439                  | 1.30E-36  | SEMA4C                             | -0.59084077                  | 6.99E-23    |
| RPP25                            | 1.833185012                  | 1.73E-149 | MAMDC4                             | -0.591072602                 | 1.60E-05    |
| SLC19A3                          | 1.832146424                  | 4.78E-09  | SLC6A8                             | -0.591100966                 | 6.65E-06    |
| ADGRE2                           | 1.823419258                  | 8.02E-26  | JAK1                               | -0.591203571                 | 8.83E-46    |
| SLC7A11                          | 1.811035481                  | 2.31E-70  | SAT1                               | -0.591263177                 | 2.27E-21    |
| TMEM52                           | 1.772524984                  | 2.43E-13  | ZNF333                             | -0.591504839                 | 0.013074569 |
| EMSLR                            | 1.736910924                  | 1.81E-164 | GMPPB                              | -0.59157568                  | 1.42E-15    |
| MIR17HG                          | 1.689194918                  | 8.80E-07  | ST3GAL4                            | -0.591728494                 | 3.91E-31    |
| CMTM8                            | 1.681194148                  | 3.61E-22  | ITPRIP                             | -0.591844318                 | 4.08E-06    |
| ADAT2                            | 1.675636771                  | 1.68E-92  | DNAH5                              | -0.591930982                 | 0.001631734 |
| LRFN1                            | 1.661666047                  | 1.03E-26  | AC005229.4                         | -0.591960909                 | 0.001478488 |
| ACTL8                            | 1.66038723                   | 1.49E-11  | LMNA                               | -0.592138776                 | 1.81E-83    |
| AMER1                            | 1.650959405                  | 2.38E-90  | AC005332.6                         | -0.592601839                 | 9.21E-25    |
| MATK                             | 1.634481721                  | 1.25E-110 | PIGQ                               | -0.592684202                 | 1.57E-21    |
| ID2                              | 1.61588637                   | 3.05E-76  | BST2                               | -0.592890343                 | 1.14E-23    |
| EN2                              | 1.607673494                  | 2.95E-71  | TECPR2                             | -0.593007762                 | 6.96E-15    |
| RGS16                            | 1.605806631                  | 7.41E-67  | ISG15                              | -0.593347328                 | 3.41E-22    |
| DNAH17-AS1                       | 1.601583462                  | 1.53E-08  | IER5L                              | -0.593475648                 | 1.15E-48    |

|             |             |             |               |              |             |
|-------------|-------------|-------------|---------------|--------------|-------------|
| PCOLCE2     | 1.580123972 | 2.81E-46    | IFT22         | -0.593976953 | 2.57E-21    |
| TAF4B       | 1.576386291 | 6.35E-110   | NICN1         | -0.594669566 | 0.004704443 |
| FJX1        | 1.568263931 | 9.44E-63    | FAM187A       | -0.594918367 | 0.021889704 |
| PFKM        | 1.548933199 | 2.22E-189   | KCNAB2        | -0.594924225 | 9.47E-08    |
| PITX1       | 1.540201322 | 4.03E-108   | ZBTB4         | -0.595391011 | 3.36E-19    |
| PODXL2      | 1.538909671 | 7.43E-117   | SH3BGRL3      | -0.595838127 | 6.26E-18    |
| ARID5A      | 1.524734157 | 2.12E-28    | TBC1D3L       | -0.596010498 | 6.30E-06    |
| METTL8      | 1.51735701  | 1.81E-113   | GLI4          | -0.59605901  | 1.21E-05    |
| ZIC5        | 1.507387866 | 6.56E-25    | RNF19A        | -0.596093619 | 1.33E-20    |
| HPDL        | 1.498607336 | 9.41E-103   | ETV5          | -0.59611932  | 1.40E-13    |
| ANKRD13B    | 1.495856119 | 6.57E-78    | DDB2          | -0.596132353 | 2.15E-07    |
| LYAR        | 1.485646615 | 5.45E-143   | PHLDA3        | -0.596215175 | 1.35E-15    |
| NRARP       | 1.484131369 | 1.53E-133   | AC009005.1    | -0.596378729 | 0.019914023 |
| SLC29A1     | 1.466158087 | 7.38E-194   | IL10RB        | -0.596499336 | 2.16E-12    |
| SNHG30      | 1.464057589 | 2.04E-42    | MYLK          | -0.596733823 | 0.021761621 |
| MPP6        | 1.43879113  | 2.10E-114   | FAM214A       | -0.596797638 | 1.42E-27    |
| MLKL        | 1.422811397 | 5.80E-88    | LUM           | -0.597424377 | 0.006489557 |
| RNF145      | 1.418391491 | 4.46E-25    | UCP2          | -0.597562053 | 7.19E-25    |
| NLN         | 1.409250023 | 2.90E-223   | TRIM62        | -0.597652698 | 7.66E-11    |
| GFOD1       | 1.400559139 | 6.64E-48    | JUND          | -0.597797615 | 1.29E-55    |
| FAM89A      | 1.399060885 | 2.88E-16    | SULT1A1       | -0.59786313  | 2.03E-10    |
| PPIF        | 1.397085198 | 2.32E-232   | REX1BD        | -0.5980511   | 1.53E-10    |
| SLC25A32    | 1.39033954  | 9.77E-150   | SLX4IP        | -0.598057678 | 1.97E-05    |
| CRYM-AS1    | 1.388592113 | 3.77E-05    | YJEFN3        | -0.598158713 | 5.17E-06    |
| RPIA        | 1.386003014 | 4.20E-164   | SNX33         | -0.59867581  | 9.31E-05    |
| MXI1        | 1.385357585 | 6.10E-102   | RHBDL1        | -0.598786879 | 0.001404136 |
| JPH1        | 1.372662988 | 1.15E-47    | ZFP36L1       | -0.598955431 | 1.28E-25    |
| GUCY1A1     | 1.371373102 | 5.30E-06    | ERBB3         | -0.599100432 | 1.16E-39    |
| CAMKK1      | 1.3688632   | 4.39E-13    | RCAN1         | -0.599666005 | 4.21E-18    |
| NPM3        | 1.367519266 | 1.92E-126   | PFKFB4        | -0.59967822  | 3.98E-06    |
| NR1D1       | 1.363861388 | 5.52E-20    | SAMD4A        | -0.599853144 | 8.83E-10    |
| AC138894.1  | 1.363425832 | 0.029202721 | PBX1          | -0.600328827 | 2.27E-37    |
| ABLIM1      | 1.35873986  | 3.20E-112   | SFXN3         | -0.600806322 | 3.58E-10    |
| IFRD1       | 1.356575559 | 5.67E-165   | TACSTD2       | -0.601153806 | 1.91E-59    |
| YRDC        | 1.355305687 | 1.44E-74    | C3orf14       | -0.60126027  | 7.46E-38    |
| NFE2L3      | 1.35474349  | 5.64E-38    | PGPEP1        | -0.6016626   | 3.00E-18    |
| CHAC1       | 1.354270954 | 7.73E-33    | SIGIRR        | -0.601816606 | 1.47E-14    |
| CHCHD4      | 1.354020246 | 1.17E-93    | LAMA5         | -0.602178764 | 3.11E-30    |
| MAP3K21     | 1.35071825  | 2.31E-32    | ZNF219        | -0.602268887 | 3.34E-09    |
| CHN1        | 1.349153646 | 1.31E-58    | RAB27B        | -0.602303107 | 1.44E-21    |
| ODC1        | 1.34108909  | 2.91E-240   | CDK2AP2       | -0.602476653 | 9.88E-28    |
| SEN3-EIF4A1 | 1.333965057 | 0.019065022 | AL354707.1    | -0.603138864 | 0.008164638 |
| CENPV       | 1.33126905  | 1.39E-31    | JMJD7-PLA2G4B | -0.603153571 | 0.000407866 |
| SLC25A19    | 1.328884592 | 3.34E-89    | ZDHHC8        | -0.603236193 | 0.000556289 |
| CCDC86      | 1.328627167 | 1.04E-193   | PLEKHO2       | -0.603911035 | 0.006879597 |
| SLCO4A1     | 1.328541872 | 1.86E-49    | NSUN7         | -0.603919766 | 0.000826469 |
| PSAT1       | 1.318107973 | 5.96E-176   | RSPH3         | -0.604155562 | 2.42E-07    |

|            |             |             |            |              |             |
|------------|-------------|-------------|------------|--------------|-------------|
| RRP9       | 1.317637321 | 3.08E-109   | GAB2       | -0.604254813 | 0.000486918 |
| HHEX       | 1.31612689  | 3.55E-12    | NDRG4      | -0.604504542 | 0.000167206 |
| TWINK      | 1.315034634 | 2.92E-110   | VAV3       | -0.605255144 | 8.11E-09    |
| EEF1AKMT4  | 1.313950782 | 3.01E-85    | ZNF350     | -0.606294434 | 0.015533406 |
| FAM117B    | 1.296472992 | 9.21E-40    | RASSF8     | -0.606401554 | 7.48E-10    |
| CARMIL2    | 1.294436393 | 7.75E-20    | JAZF1      | -0.607881613 | 0.003248433 |
| NDUFAF4    | 1.291106076 | 1.94E-61    | AJUBA      | -0.608024739 | 6.34E-24    |
| ZNF296     | 1.290168477 | 4.80E-27    | ADAM8      | -0.608437805 | 0.000952282 |
| CACHD1     | 1.289478629 | 1.21E-06    | CDK19      | -0.608491243 | 2.29E-18    |
| SMKR1      | 1.287819134 | 7.46E-37    | SLC30A3    | -0.608623091 | 0.005059186 |
| PMAIP1     | 1.285011907 | 9.64E-17    | AOPEP      | -0.608780535 | 8.67E-15    |
| PSMG1      | 1.2817345   | 8.77E-130   | CELSR1     | -0.608806402 | 2.95E-19    |
| CDC42EP1   | 1.281419667 | 1.66E-160   | TMEM121    | -0.608815077 | 1.33E-05    |
| RPP40      | 1.279165783 | 7.27E-41    | HIPK2      | -0.608844747 | 7.18E-06    |
| DNAJC2     | 1.267065503 | 5.45E-156   | ZFP14      | -0.608966161 | 0.002244882 |
| RRP1B      | 1.259631481 | 1.43E-161   | C21orf58   | -0.609296012 | 6.80E-07    |
| RABEPK     | 1.25810531  | 1.99E-86    | CCS        | -0.60943011  | 3.70E-13    |
| BAG2       | 1.248647495 | 4.36E-33    | SHLD1      | -0.609534128 | 0.038669878 |
| PNP        | 1.24517478  | 1.75E-111   | GPR137C    | -0.610183786 | 1.04E-05    |
| SACS       | 1.239585544 | 6.51E-75    | LMBRD1     | -0.610254332 | 5.22E-19    |
| GEMIN5     | 1.236984226 | 1.95E-166   | HSD17B1    | -0.610598186 | 3.45E-05    |
| USP2       | 1.232067123 | 1.00E-09    | RNF213     | -0.610713422 | 6.88E-22    |
| RIOK1      | 1.230989773 | 7.95E-84    | FRMD6-AS1  | -0.610812089 | 0.025030943 |
| AL358113.1 | 1.230644965 | 1.26E-05    | ENPEP      | -0.61083958  | 0.029852565 |
| KCTD12     | 1.22855912  | 1.48E-22    | TGFBR1     | -0.610997061 | 8.52E-26    |
| CDC42EP2   | 1.220400428 | 3.59E-11    | TSPAN15    | -0.611226937 | 1.35E-40    |
| SLC25A33   | 1.21792528  | 7.09E-72    | ATP7A      | -0.611300455 | 1.05E-07    |
| AL445423.3 | 1.217895249 | 0.000200717 | RELL2      | -0.611405781 | 2.83E-06    |
| GBX2       | 1.217146208 | 5.33E-08    | KIFC2      | -0.611661267 | 3.41E-06    |
| SLC27A5    | 1.215264061 | 8.02E-23    | CDYL2      | -0.611679284 | 1.80E-32    |
| ANP32A     | 1.214019006 | 2.32E-175   | LINC01503  | -0.611708433 | 0.019494884 |
| FASTKD1    | 1.211646286 | 9.69E-51    | PARP14     | -0.612703061 | 1.81E-23    |
| TMEM158    | 1.204359846 | 0.000476261 | H3C10      | -0.612767025 | 2.54E-05    |
| FAM131C    | 1.20227226  | 5.00E-07    | MPZL2      | -0.613154425 | 4.25E-41    |
| NTHL1      | 1.201646025 | 5.43E-41    | RAB24      | -0.613372586 | 5.79E-21    |
| CD3EAP     | 1.201491748 | 2.10E-118   | MBOAT1     | -0.614142198 | 6.07E-07    |
| GPR63      | 1.200218768 | 1.73E-09    | MEGF8      | -0.614374272 | 3.52E-16    |
| AP002387.2 | 1.188215989 | 1.20E-12    | MYH9       | -0.614444664 | 4.16E-16    |
| NAT8L      | 1.187447028 | 8.26E-45    | AP003108.2 | -0.614955883 | 0.000295036 |
| FAM81A     | 1.183513753 | 3.30E-14    | FBXO32     | -0.615107088 | 2.57E-05    |
| GALNT18    | 1.182847752 | 2.55E-70    | FBXO41     | -0.615398291 | 0.002675973 |
| EPOP       | 1.18076485  | 6.97E-102   | NUTM2B     | -0.615574393 | 0.013424628 |
| LOXL3      | 1.17980504  | 3.62E-17    | FRMD4B     | -0.616003714 | 9.46E-06    |
| SFXN4      | 1.175951521 | 1.51E-63    | ERAP1      | -0.616111155 | 2.24E-16    |
| CTU2       | 1.171517809 | 1.68E-52    | HGSNAT     | -0.616247718 | 8.83E-10    |
| REXO4      | 1.166925956 | 6.77E-175   | JUP        | -0.616554747 | 2.43E-69    |
| SNRPA1     | 1.161369807 | 9.68E-136   | SLC2A1     | -0.617158782 | 1.01E-51    |

|          |             |             |            |              |             |
|----------|-------------|-------------|------------|--------------|-------------|
| TFB2M    | 1.160086334 | 5.15E-60    | BHLHE40    | -0.617296466 | 2.07E-42    |
| CCDC58   | 1.158983013 | 3.89E-49    | LRRC27     | -0.61734013  | 7.48E-05    |
| DIMT1    | 1.158644317 | 3.67E-122   | TMEM170B   | -0.617579812 | 1.75E-07    |
| WDR3     | 1.157009719 | 1.99E-155   | DUSP5      | -0.618060365 | 2.26E-06    |
| ADAMTS17 | 1.153179885 | 8.51E-05    | GABBR1     | -0.618431201 | 0.00033958  |
| GALNT14  | 1.152910618 | 7.25E-41    | SLC16A3    | -0.618524425 | 0.003240731 |
| TRMT11   | 1.15247867  | 2.94E-56    | AC105219.4 | -0.618627758 | 0.018903225 |
| SUPV3L1  | 1.151952553 | 1.93E-79    | C3orf67    | -0.61869749  | 0.028651182 |
| DPH2     | 1.151375564 | 1.49E-108   | STAG3L5P   | -0.61876046  | 0.002367631 |
| MON1A    | 1.150819064 | 2.56E-40    | NRM        | -0.618811986 | 2.56E-07    |
| ASS1     | 1.150724438 | 1.12E-138   | MSRB2      | -0.618952898 | 3.34E-10    |
| CCDC85B  | 1.142523522 | 1.96E-146   | PLCB3      | -0.619043638 | 3.71E-39    |
| CDKL1    | 1.142014794 | 0.004947484 | TRPS1      | -0.619401433 | 5.79E-38    |
| WDR43    | 1.141229839 | 3.46E-185   | HS1BP3     | -0.619533098 | 1.65E-09    |
| MTHFD2   | 1.139864299 | 7.71E-217   | SRR        | -0.619847096 | 7.03E-06    |
| NOC3L    | 1.139862503 | 8.80E-91    | ZNF548     | -0.620079067 | 0.008071748 |
| GRB14    | 1.13963617  | 1.04E-21    | PHYKPL     | -0.620227829 | 2.27E-11    |
| NOP16    | 1.139624389 | 9.47E-136   | ALKBH6     | -0.620270701 | 1.43E-10    |
| DDX10    | 1.139041075 | 1.00E-66    | RGS12      | -0.621018897 | 7.12E-07    |
| NDUFAB2  | 1.135357211 | 1.15E-56    | SDCBP      | -0.621299083 | 4.05E-25    |
| GLS      | 1.132534187 | 1.24E-146   | NAGLU      | -0.621402128 | 2.54E-20    |
| PALD1    | 1.131302193 | 1.03E-09    | RIMS3      | -0.623028619 | 1.13E-10    |
| DDX21    | 1.129848318 | 7.59E-200   | GATA3-AS1  | -0.623394182 | 0.003447654 |
| SMG1P6   | 1.129334212 | 0.007039814 | CADM4      | -0.623776403 | 0.000188954 |
| ASB13    | 1.129324529 | 8.44E-54    | AC074143.1 | -0.623923809 | 1.97E-06    |
| NOLC1    | 1.12855734  | 2.25E-188   | GOLGA2P5   | -0.623982796 | 0.000785122 |
| NCR3LG1  | 1.12845201  | 0.001036546 | SUSD1      | -0.624005093 | 0.000107332 |
| C1orf109 | 1.127899112 | 1.15E-45    | HTRA1      | -0.624116691 | 0.001632741 |
| ABCC4    | 1.126918452 | 1.15E-57    | ING4       | -0.624284761 | 6.30E-06    |
| IMPDH1   | 1.125672746 | 1.25E-146   | TMUB2      | -0.624458605 | 6.04E-09    |
| DCUN1D5  | 1.124986656 | 1.24E-108   | SLC27A1    | -0.624597374 | 0.012835098 |
| TXLNG    | 1.124589467 | 2.21E-97    | FLNB       | -0.625123253 | 2.06E-53    |
| ZNF778   | 1.121465992 | 9.79E-107   | LINC01569  | -0.625129904 | 0.030522291 |
| PNO1     | 1.118925282 | 2.28E-83    | LINC00205  | -0.625140249 | 7.29E-19    |
| GNB4     | 1.115156605 | 6.73E-10    | LPIN3      | -0.625159864 | 9.22E-24    |
| PDCD2L   | 1.113260862 | 3.12E-41    | PKD2       | -0.625361774 | 3.28E-12    |
| JAG2     | 1.112555718 | 1.48E-75    | GSTZ1      | -0.625539903 | 2.56E-18    |
| RAB3A    | 1.111105816 | 4.22E-11    | HSD17B11   | -0.625870626 | 0.018497288 |
| EIF2B3   | 1.111057075 | 2.13E-46    | ATP2B1-AS1 | -0.625980836 | 0.003921009 |
| KLHL21   | 1.109811794 | 2.12E-78    | GHDC       | -0.626529384 | 2.01E-09    |
| BEND3    | 1.109173086 | 1.84E-30    | STAG3      | -0.626565758 | 0.007802965 |
| CMSS1    | 1.107605796 | 1.45E-83    | CASP4      | -0.627996308 | 0.00221885  |
| FBXO45   | 1.105841787 | 6.71E-175   | DNASE1L2   | -0.628095121 | 0.016753515 |
| UCK2     | 1.102671853 | 2.37E-122   | HSPB1      | -0.628096615 | 5.18E-55    |
| SLC39A14 | 1.101795932 | 6.72E-97    | PARP11     | -0.628556082 | 0.000429702 |
| GPRC5B   | 1.100948537 | 0.000412286 | MPND       | -0.628678881 | 1.67E-09    |
| RPUSD1   | 1.100852601 | 9.06E-139   | ZNF329     | -0.628740299 | 0.005913125 |

|             |             |             |            |              |             |
|-------------|-------------|-------------|------------|--------------|-------------|
| HOMER1      | 1.100544512 | 1.91E-84    | BAALC-AS1  | -0.629090895 | 0.03755858  |
| RNASEH1-AS1 | 1.099838159 | 2.21E-21    | IL10RB-DT  | -0.629208568 | 0.016902677 |
| TASOR2      | 1.097735049 | 2.94E-140   | ITGA7      | -0.629273733 | 0.031437223 |
| AL024508.1  | 1.097189477 | 2.16E-23    | FHDC1      | -0.629333972 | 5.02E-06    |
| RPUSD4      | 1.092946361 | 2.04E-42    | GRIPAP1    | -0.629459378 | 1.30E-23    |
| ZIC2        | 1.0907191   | 2.14E-22    | PHETA1     | -0.629813512 | 5.35E-08    |
| RP9P        | 1.09025839  | 1.87E-16    | PREX1      | -0.630053813 | 1.72E-57    |
| FTL         | 1.08995073  | 1.01E-129   | PDIA3P1    | -0.630171059 | 0.000126996 |
| RRP1        | 1.0884505   | 2.41E-105   | AGER       | -0.630765891 | 0.013838384 |
| FAM216A     | 1.088218433 | 1.47E-19    | CSRP1      | -0.630823553 | 8.81E-80    |
| SCML2       | 1.086309949 | 3.30E-15    | TNNT1      | -0.630833855 | 1.99E-16    |
| POLR1C      | 1.085840263 | 1.73E-112   | MSRB1      | -0.631334909 | 6.88E-25    |
| COQ3        | 1.085563152 | 2.14E-25    | MYADM      | -0.63134981  | 5.01E-13    |
| UTP20       | 1.085131247 | 1.66E-98    | PSD4       | -0.631717005 | 5.43E-26    |
| GRPEL1      | 1.084353203 | 7.95E-99    | KCTD21     | -0.631873547 | 4.88E-06    |
| DIXDC1      | 1.078095401 | 0.000418417 | BMP1       | -0.631883518 | 1.85E-12    |
| TIMM44      | 1.07712375  | 9.71E-82    | TSNAXIP1   | -0.632209396 | 0.049934813 |
| AEN         | 1.076909945 | 1.00E-72    | SMIM5      | -0.632377999 | 1.01E-06    |
| ZNF639      | 1.075782985 | 6.11E-58    | LMF1       | -0.632838793 | 8.43E-08    |
| ELL3        | 1.074357591 | 1.60E-14    | ATP6V1FNB  | -0.633029372 | 0.039542045 |
| MRPS30      | 1.071575952 | 4.68E-90    | TSPAN4     | -0.633077459 | 4.95E-14    |
| MRM3        | 1.071418722 | 2.66E-64    | CD82       | -0.633318188 | 3.78E-06    |
| KLHL23      | 1.070180606 | 4.75E-23    | TMEM143    | -0.633427648 | 0.012107109 |
| HMGA1       | 1.070037926 | 6.68E-195   | SH3BGR1    | -0.633750071 | 6.06E-35    |
| MAK16       | 1.067308334 | 3.33E-67    | ZNF641     | -0.633995664 | 1.98E-09    |
| NANOS1      | 1.063697047 | 4.67E-15    | CKB        | -0.634756686 | 0.000153266 |
| USP31       | 1.061533404 | 2.57E-60    | LINC00963  | -0.635852873 | 1.59E-25    |
| UBE3D       | 1.061204402 | 1.65E-11    | TMEM87B    | -0.636027155 | 1.64E-21    |
| TOP1MT      | 1.06020807  | 4.27E-90    | EFCAB6     | -0.636271586 | 0.045961377 |
| SINHCAF     | 1.05842097  | 4.82E-55    | ACADVL     | -0.6364753   | 8.31E-46    |
| POLR1E      | 1.056421658 | 6.07E-36    | LINC01116  | -0.636543614 | 0.013393722 |
| FMNL2       | 1.053363794 | 9.74E-28    | CCHCR1     | -0.637179476 | 3.33E-08    |
| COQ8A       | 1.051263535 | 1.25E-51    | FAM66D     | -0.637897572 | 0.047186204 |
| RINL        | 1.049646002 | 2.08E-05    | ABHD2      | -0.638127276 | 2.62E-22    |
| RSL1D1      | 1.049026511 | 6.40E-182   | SPSB1      | -0.638273823 | 0.000394863 |
| KAZN        | 1.049014485 | 1.66E-42    | PTPN21     | -0.638385325 | 4.45E-16    |
| WDR12       | 1.048691187 | 1.70E-80    | CABLES2    | -0.638436842 | 6.41E-15    |
| PRR19       | 1.045561127 | 5.24E-11    | GRIN1      | -0.638509153 | 2.73E-05    |
| TRAP1       | 1.045215884 | 5.07E-188   | SLX1A      | -0.63885549  | 1.52E-05    |
| XPOT        | 1.042848708 | 1.81E-236   | DOCK11     | -0.639133903 | 1.34E-12    |
| SLC43A1     | 1.042805281 | 0.002410094 | LINC01089  | -0.639473593 | 0.038539971 |
| OSBPL6      | 1.040561561 | 5.19E-14    | PDE5A      | -0.639582607 | 2.51E-05    |
| TUBE1       | 1.037823973 | 4.57E-12    | AC073957.3 | -0.639768653 | 0.002648823 |
| SH2D5       | 1.036061888 | 9.57E-07    | CYP4V2     | -0.640096149 | 2.41E-06    |
| DNAH14      | 1.034035978 | 2.10E-12    | ZNF774     | -0.640179832 | 0.00692373  |
| PRR5        | 1.030188055 | 1.99E-61    | LINC00847  | -0.640298283 | 2.47E-07    |
| LDLRAD3     | 1.028550037 | 9.28E-18    | GPAA1      | -0.640333652 | 8.55E-50    |

|             |             |             |             |              |             |
|-------------|-------------|-------------|-------------|--------------|-------------|
| BLMH        | 1.027827212 | 2.17E-49    | AC022400.9  | -0.640560538 | 0.019150744 |
| FXN         | 1.026408568 | 1.58E-27    | ENO2        | -0.640579225 | 2.01E-05    |
| ESF1        | 1.023815451 | 2.18E-85    | PPP1R15A    | -0.640746646 | 5.15E-06    |
| NT5DC3      | 1.022080072 | 2.52E-17    | OPHN1       | -0.640802473 | 3.82E-07    |
| KIF9        | 1.020116553 | 7.36E-14    | NMB         | -0.640809398 | 1.89E-23    |
| RBM28       | 1.019240851 | 2.85E-73    | CFAP410     | -0.641224308 | 3.02E-15    |
| ADORA2B     | 1.018776988 | 4.86E-17    | LRIG1       | -0.64163368  | 1.26E-13    |
| ID1         | 1.017982857 | 1.46E-131   | EML2        | -0.641681444 | 8.02E-17    |
| FAM155B     | 1.017330394 | 9.51E-27    | DNAL4       | -0.64215129  | 1.33E-08    |
| RPL23AP7    | 1.016800391 | 6.24E-05    | H4C11       | -0.642628753 | 0.033227256 |
| CAMKMT      | 1.016665057 | 6.43E-10    | FAM174B     | -0.642709089 | 1.57E-51    |
| DEPTOR      | 1.016649917 | 4.18E-10    | NCSTN       | -0.643022155 | 9.47E-22    |
| CHAC2       | 1.012037942 | 1.36E-25    | UBL3        | -0.64319536  | 2.57E-57    |
| CDV3        | 1.009560007 | 6.33E-143   | SERPINB1    | -0.643259695 | 1.01E-12    |
| PNPT1       | 1.009204259 | 5.71E-87    | AC244090.1  | -0.643364653 | 0.00290113  |
| THAP11      | 1.008917116 | 6.82E-82    | CARF        | -0.644418061 | 0.000763131 |
| CRACR2A     | 1.008016651 | 3.30E-21    | LIPH        | -0.644450406 | 0.00782212  |
| MARS2       | 1.00786106  | 3.79E-45    | GABARAP     | -0.645177046 | 3.75E-34    |
| PPTC7       | 1.007782179 | 4.01E-53    | WDR13       | -0.645214703 | 3.52E-25    |
| NUFIP1      | 1.007418798 | 1.74E-37    | CXXC5       | -0.645229831 | 1.16E-55    |
| AC009831.1  | 1.007234455 | 0.001111071 | CRELD1      | -0.645402316 | 2.18E-07    |
| CNKS3R3     | 1.006466246 | 4.38E-09    | KLF12       | -0.645837593 | 0.000919505 |
| ZNF30       | 1.006169114 | 8.09E-11    | LNK1        | -0.646279953 | 2.09E-05    |
| PDSS1       | 1.005884226 | 1.03E-35    | TMEM79      | -0.646341726 | 4.05E-12    |
| THAP4       | 1.003949831 | 5.40E-101   | ITPR2       | -0.6464927   | 2.77E-12    |
| KLHL18      | 1.003390979 | 2.56E-49    | IGSF3       | -0.646500733 | 3.90E-55    |
| CCDC59      | 1.002945433 | 4.16E-57    | GOLT1A      | -0.646574708 | 3.58E-05    |
| BRIX1       | 1.001511397 | 1.24E-55    | SLC46A3     | -0.646722429 | 1.66E-06    |
| NOTCH1      | 1.000973153 | 2.61E-46    | NUDT16      | -0.647373581 | 4.98E-21    |
| NT5C3A      | 0.999658214 | 1.05E-63    | ANKRA2      | -0.647386934 | 1.87E-06    |
| SLC16A1-AS1 | 0.99907774  | 0.000240484 | BAD         | -0.647416203 | 3.30E-20    |
| GTF2H2      | 0.998957591 | 3.79E-65    | C19orf57    | -0.647728377 | 0.000708889 |
| MRPL1       | 0.998707678 | 4.39E-50    | SLC25A5-AS1 | -0.648397437 | 0.035860955 |
| MXN1-AS1    | 0.9982327   | 1.68E-12    | PROB1       | -0.648868557 | 0.003490105 |
| AC107871.1  | 0.998058676 | 1.95E-09    | RMND5B      | -0.649089688 | 9.42E-63    |
| TCOF1       | 0.997198778 | 4.03E-129   | PLIN3       | -0.649190477 | 1.43E-27    |
| SOX12       | 0.99640963  | 1.50E-77    | FICD        | -0.649290338 | 1.06E-06    |
| DNAAF2      | 0.996303968 | 1.53E-58    | ATF7-NPFF   | -0.649403903 | 0.026892191 |
| LYSMD2      | 0.995865184 | 2.02E-41    | CHST14      | -0.649434696 | 2.46E-11    |
| INTS13      | 0.995259854 | 3.91E-63    | PPP1R3E     | -0.649608599 | 7.46E-05    |
| ACTR5       | 0.995200183 | 1.36E-17    | CNPY4       | -0.64969212  | 2.26E-10    |
| RIOX2       | 0.991930998 | 6.26E-87    | ODF2L       | -0.650140824 | 0.000687331 |
| POLR1B      | 0.990824199 | 4.50E-104   | MAN2B2      | -0.650333834 | 4.92E-13    |
| TRPM6       | 0.990320651 | 0.000120433 | PMS2P4      | -0.650377081 | 0.039130248 |
| LYRM4       | 0.989896365 | 1.40E-23    | TBC1D8B     | -0.650527925 | 1.33E-08    |
| FASTKD3     | 0.988959644 | 2.26E-15    | P3H1        | -0.650823169 | 4.10E-09    |
| DLEU1       | 0.988585406 | 8.51E-20    | TSC22D3     | -0.650833135 | 2.06E-39    |

|            |             |             |            |              |             |
|------------|-------------|-------------|------------|--------------|-------------|
| PFDN2      | 0.987362626 | 2.98E-70    | SLC22A4    | -0.650847608 | 0.048323392 |
| SMG1P2     | 0.986994829 | 8.84E-17    | PLEKHM1P1  | -0.650958664 | 1.87E-11    |
| MRPS2      | 0.986602112 | 3.86E-112   | BDH2       | -0.650994409 | 0.035946472 |
| PAK1IP1    | 0.986443321 | 1.59E-50    | XYLT1      | -0.65104501  | 0.032229336 |
| ZC3H8      | 0.986154375 | 9.01E-31    | LINC00886  | -0.651064653 | 0.000164232 |
| C1QBP      | 0.984938501 | 1.12E-157   | GM2A       | -0.651079095 | 1.52E-08    |
| SLC35F2    | 0.98421611  | 7.85E-52    | RHOBTB1    | -0.651157708 | 4.28E-05    |
| C5orf30    | 0.982795015 | 2.28E-36    | DPYSL2     | -0.651206405 | 1.57E-14    |
| NOL10      | 0.981250048 | 6.03E-77    | SYNC       | -0.651253448 | 0.002218689 |
| CHORDC1    | 0.976130833 | 1.72E-63    | FAM47E     | -0.651330735 | 0.045961377 |
| GTF2F2     | 0.975713602 | 2.96E-56    | QSOX1      | -0.651743376 | 7.59E-72    |
| GNPDA1     | 0.974267928 | 1.20E-49    | TCAF1P1    | -0.651965099 | 6.86E-08    |
| TYW3       | 0.973899914 | 6.94E-35    | NPEPL1     | -0.652627879 | 1.26E-41    |
| RUVBL1     | 0.973707284 | 1.29E-99    | CTNNBIP1   | -0.652773488 | 5.55E-14    |
| ADAM11     | 0.971486959 | 5.05E-06    | CERCAM     | -0.653598939 | 7.23E-36    |
| DHX33      | 0.971110572 | 9.37E-58    | RNASEL     | -0.654180732 | 2.12E-06    |
| MRTO4      | 0.970951044 | 5.89E-85    | STOML1     | -0.654251987 | 7.39E-06    |
| CTU1       | 0.970390504 | 1.04E-14    | ICA1L      | -0.654710478 | 0.001858005 |
| PHGDH      | 0.969803559 | 2.20E-120   | TBC1D9     | -0.654943026 | 3.51E-27    |
| NFKBIB     | 0.969397039 | 4.63E-47    | FLVCR2     | -0.655214836 | 2.38E-25    |
| NIP7       | 0.968644191 | 1.11E-126   | SMTN       | -0.655377784 | 2.39E-27    |
| SNHG4      | 0.968450199 | 3.65E-23    | OPTN       | -0.655784816 | 1.01E-28    |
| GLRX3      | 0.967764181 | 6.46E-96    | S1PR3      | -0.655844469 | 7.60E-19    |
| ZNF239     | 0.96753087  | 1.53E-16    | CIC        | -0.656707677 | 5.84E-34    |
| KBTBD6     | 0.967246659 | 1.64E-28    | ARPC4-TTL3 | -0.656995412 | 0.010595614 |
| STOM       | 0.966409756 | 4.25E-82    | TRPV1      | -0.65728681  | 0.00031463  |
| TMEM33     | 0.965488876 | 2.90E-65    | ALG10B     | -0.657452993 | 1.97E-08    |
| AL118516.1 | 0.964350503 | 1.87E-07    | TMEM187    | -0.658150751 | 5.05E-05    |
| E2F5       | 0.963666845 | 1.89E-37    | CORO2A     | -0.658507622 | 4.13E-08    |
| WDR4       | 0.962573756 | 1.08E-29    | N4BP3      | -0.658916084 | 7.48E-40    |
| CYCS       | 0.96127361  | 1.69E-104   | FAT1       | -0.659016543 | 3.75E-38    |
| EIF3J      | 0.961225766 | 8.66E-96    | AC010184.1 | -0.659023958 | 0.013615844 |
| CIART      | 0.960121347 | 8.40E-20    | CTSK       | -0.659524272 | 0.031484192 |
| TIMM17A    | 0.959911796 | 6.10E-78    | PDLIM2     | -0.659744188 | 9.38E-12    |
| HSPD1      | 0.958731196 | 1.31E-157   | BMP8B      | -0.660127159 | 8.74E-05    |
| DUSP7      | 0.957707376 | 7.50E-18    | PRLR       | -0.660195575 | 3.69E-06    |
| ECSIT      | 0.956522196 | 1.85E-65    | RHPN1      | -0.660773102 | 9.33E-38    |
| PACC1      | 0.954978453 | 6.66E-14    | RNF207     | -0.66088262  | 5.13E-07    |
| PPID       | 0.954276562 | 1.80E-73    | HERC6      | -0.662280577 | 7.73E-06    |
| RAB29      | 0.9530415   | 1.17E-44    | RHOBTB2    | -0.663205638 | 2.79E-27    |
| THUMPD2    | 0.952860026 | 2.73E-17    | CLTB       | -0.663267388 | 1.92E-92    |
| PPM1M      | 0.951336015 | 4.69E-06    | CCDC157    | -0.664577464 | 0.000860955 |
| PRMT5      | 0.950319554 | 9.31E-119   | PXMP4      | -0.664633853 | 1.29E-12    |
| DGKE       | 0.949550115 | 1.76E-40    | HS6ST3     | -0.664643243 | 2.21E-08    |
| NAF1       | 0.94908458  | 4.55E-36    | MSH5       | -0.665030788 | 0.0025942   |
| SLC16A10   | 0.948015844 | 0.000480013 | MFAP2      | -0.665071268 | 0.000931786 |
| CDC123     | 0.94728095  | 2.54E-104   | AK9        | -0.665209152 | 3.25E-06    |

|            |             |             |            |              |             |
|------------|-------------|-------------|------------|--------------|-------------|
| ICOSLG     | 0.947050182 | 1.05E-09    | SLC38A10   | -0.665639416 | 2.68E-44    |
| GATAD2A    | 0.945852363 | 2.18E-120   | FBXL2      | -0.665817317 | 0.022507235 |
| LTV1       | 0.945450652 | 2.95E-71    | PLSCR3     | -0.666133736 | 2.26E-20    |
| SHISA9     | 0.94495779  | 1.06E-13    | NUAK1      | -0.666182461 | 1.27E-07    |
| FP565260.3 | 0.944652178 | 8.11E-10    | HEG1       | -0.666662286 | 2.39E-05    |
| COA6       | 0.943682894 | 3.00E-19    | INPP5J     | -0.666706241 | 0.015096359 |
| CDC25A     | 0.942874415 | 3.64E-30    | TEP1       | -0.666847577 | 3.59E-10    |
| PRMT3      | 0.942661896 | 1.06E-49    | RBM43      | -0.666865775 | 0.000171646 |
| GNB1L      | 0.941967002 | 3.79E-26    | CIRBP      | -0.667007843 | 3.46E-34    |
| WDR74      | 0.941497461 | 3.86E-86    | H2BC18     | -0.667012088 | 0.012194788 |
| IMP4       | 0.941131774 | 3.18E-137   | TRIM21     | -0.667493465 | 3.07E-09    |
| CCDC138    | 0.939815606 | 1.84E-16    | RHOC       | -0.667963229 | 1.27E-65    |
| PDP2       | 0.937597935 | 2.63E-41    | ZNF217     | -0.669081159 | 1.48E-72    |
| PPT2       | 0.936023387 | 6.84E-20    | TNFRSF12A  | -0.669136126 | 1.16E-11    |
| MRPL50     | 0.934932141 | 5.77E-47    | QDPR       | -0.669259849 | 1.83E-08    |
| PER1       | 0.934196071 | 5.96E-15    | ZBTB38     | -0.669367185 | 3.80E-09    |
| TRNP1      | 0.933810375 | 4.82E-08    | GRAMD1A    | -0.669383029 | 2.27E-11    |
| TNFRSF10A  | 0.932123392 | 1.28E-29    | GIHCG      | -0.669788962 | 0.007450422 |
| SIK1B      | 0.932052191 | 5.89E-33    | ALCAM      | -0.669972033 | 1.20E-47    |
| SLC25A15   | 0.930707522 | 3.45E-67    | AL365181.3 | -0.671189656 | 7.58E-07    |
| SEH1L      | 0.930583554 | 4.34E-71    | IFT140     | -0.671616293 | 7.74E-21    |
| LRIG3      | 0.930568828 | 6.20E-12    | ZBED6      | -0.671716443 | 2.29E-05    |
| RNF138     | 0.929557367 | 1.30E-52    | HR         | -0.671909055 | 8.19E-13    |
| ASNS       | 0.92927061  | 7.44E-106   | GRIN2D     | -0.672313783 | 0.005306656 |
| GTF2H2B    | 0.929047751 | 4.59E-08    | ENPP5      | -0.672322111 | 0.000265041 |
| PCOTH      | 0.927694622 | 0.013241972 | ADCY6      | -0.67243079  | 1.17E-36    |
| GCFC2      | 0.927691503 | 4.00E-24    | FRAT1      | -0.672784472 | 2.39E-05    |
| MET        | 0.927065114 | 5.60E-18    | TGFBR2     | -0.67282182  | 9.49E-05    |
| TRMT61A    | 0.926959938 | 2.20E-48    | FAM111A-DT | -0.672918446 | 0.002442749 |
| PUS7       | 0.925990752 | 1.67E-88    | BBS1       | -0.673045692 | 1.06E-06    |
| KRT8P12    | 0.925700343 | 0.00090267  | PXYLP1     | -0.673072832 | 5.34E-05    |
| NREP       | 0.925177682 | 0.01429461  | IQGAP3     | -0.673272346 | 6.95E-28    |
| PUM3       | 0.924745386 | 2.86E-70    | GAMT       | -0.673344424 | 7.95E-05    |
| SLC25A37   | 0.924397425 | 9.64E-50    | PLEKHA4    | -0.673377947 | 0.032800521 |
| TDRD1      | 0.924294994 | 1.88E-33    | LRRC37A3   | -0.673991424 | 2.08E-05    |
| SMAD9      | 0.923698487 | 0.006996801 | TMEM44     | -0.674000454 | 2.88E-08    |
| MARC1      | 0.923496331 | 2.81E-23    | MARCHF9    | -0.674859446 | 3.51E-12    |
| AK6        | 0.923481654 | 3.08E-66    | SLC26A11   | -0.674873061 | 8.44E-10    |
| GRPEL2     | 0.922656759 | 1.07E-30    | TMEM107    | -0.674945441 | 2.06E-05    |
| SETDB2     | 0.921479509 | 3.60E-12    | CSGALNACT1 | -0.675502099 | 8.35E-06    |
| DUSP9      | 0.921379799 | 0.002823524 | PIK3R3     | -0.675584207 | 3.46E-31    |
| ZBTB2      | 0.921046586 | 4.68E-66    | MAP3K6     | -0.67576463  | 5.12E-12    |
| C15orf39   | 0.919702321 | 3.57E-54    | KANK2      | -0.675798407 | 2.16E-30    |
| RPF2       | 0.919664006 | 1.09E-60    | AC015813.6 | -0.676218362 | 1.13E-08    |
| HSPA4L     | 0.918602406 | 2.38E-38    | MR1        | -0.676281778 | 7.10E-08    |
| UCHL5      | 0.918353627 | 3.35E-85    | STAT2      | -0.6763569   | 3.17E-19    |
| PRELID3A   | 0.918160671 | 6.17E-10    | MAP4K2     | -0.676710389 | 3.97E-10    |



|            |             |             |            |              |             |
|------------|-------------|-------------|------------|--------------|-------------|
| PWP1       | 0.917794997 | 4.10E-91    | ALDH16A1   | -0.676810891 | 2.22E-26    |
| USP18      | 0.91742954  | 2.88E-16    | MOV10      | -0.677282047 | 9.09E-33    |
| AC083899.1 | 0.915912238 | 0.000587223 | MMP25-AS1  | -0.677401016 | 7.48E-09    |
| PHB        | 0.915185686 | 9.37E-160   | SCARF2     | -0.677704389 | 0.031478584 |
| EEF1E1     | 0.915106968 | 9.11E-33    | CCDC189    | -0.677847801 | 6.03E-05    |
| ADM5       | 0.914380554 | 1.12E-06    | SEMA6B     | -0.67795652  | 2.77E-05    |
| NPM1       | 0.913900944 | 5.43E-141   | TAX1BP3    | -0.678111748 | 3.81E-53    |
| MAPRE2     | 0.913650143 | 2.40E-06    | SLC22A23   | -0.678279398 | 1.03E-13    |
| EIF1AX     | 0.911052345 | 8.89E-92    | AL109918.1 | -0.678458343 | 0.001179876 |
| NFIX       | 0.91022717  | 4.09E-22    | LAMB1      | -0.678757022 | 1.44E-48    |
| GNL3LP1    | 0.910132548 | 8.01E-07    | NPNT       | -0.679043713 | 2.20E-39    |
| POLR3K     | 0.909827097 | 1.05E-67    | ACAD11     | -0.679642739 | 3.66E-12    |
| FAM136A    | 0.908305636 | 5.76E-122   | LINC00265  | -0.679751674 | 0.000691294 |
| AHSA1      | 0.908247718 | 1.87E-97    | TPBG       | -0.680592608 | 1.93E-54    |
| WNK2       | 0.907535959 | 9.27E-24    | S100A16    | -0.68076479  | 2.10E-77    |
| SLC9B2     | 0.90557871  | 2.08E-14    | TAPBP      | -0.680892752 | 1.40E-28    |
| ATP11C     | 0.905392015 | 3.96E-57    | CCDC68     | -0.681379215 | 0.000171432 |
| AGPAT5     | 0.904793071 | 2.30E-67    | TTC9       | -0.681819471 | 4.91E-26    |
| JMJD6      | 0.904386094 | 6.95E-37    | HSF4       | -0.681974833 | 1.35E-08    |
| RSL24D1    | 0.903931105 | 3.15E-106   | RNF223     | -0.681975149 | 2.10E-17    |
| AL161772.1 | 0.903642626 | 8.90E-13    | AC055811.4 | -0.682438382 | 0.004195018 |
| SCO2       | 0.902752034 | 4.66E-21    | DENND1C    | -0.68262544  | 4.06E-05    |
| PPAN       | 0.902291137 | 5.04E-14    | RAB13      | -0.683621464 | 4.78E-40    |
| RN7SL3     | 0.901913229 | 0.032256434 | KRTAP5-AS1 | -0.683953817 | 6.04E-10    |
| FLVCR1     | 0.900831988 | 3.44E-14    | MALRD1     | -0.684416284 | 0.017262773 |
| NUP35      | 0.900043602 | 2.55E-36    | RBM11      | -0.68457035  | 0.0378601   |
| OAF        | 0.896305233 | 1.94E-13    | KIAA0895L  | -0.684796105 | 2.18E-11    |
| ZBTB24     | 0.894679243 | 3.21E-38    | ZNF226     | -0.68501928  | 0.000161348 |
| KBTBD8     | 0.894302589 | 7.84E-12    | RNFT1      | -0.68567815  | 5.62E-13    |
| TENT4B     | 0.89389658  | 3.37E-36    | TIGD7      | -0.68574751  | 0.009592552 |
| ZPR1       | 0.892759727 | 2.34E-43    | RGS9       | -0.686093305 | 0.02010857  |
| MRPS6      | 0.8903131   | 3.43E-48    | NINL       | -0.686340914 | 7.34E-15    |
| RP9        | 0.890239681 | 3.14E-26    | HSPA2      | -0.686437697 | 3.47E-09    |
| RPARP-AS1  | 0.890016836 | 7.02E-14    | GNAI2      | -0.686496029 | 1.15E-47    |
| DUS3L      | 0.888397545 | 5.20E-40    | FOXO4      | -0.686568772 | 0.000839887 |
| OXNAD1     | 0.888137381 | 3.57E-29    | CDKN2C     | -0.687023501 | 3.94E-12    |
| NCS1       | 0.885866004 | 3.26E-83    | AHNAK      | -0.687654386 | 3.81E-19    |
| C12orf29   | 0.8857381   | 1.20E-30    | ARHGEF25   | -0.688125713 | 2.43E-05    |
| BOP1       | 0.885716461 | 1.20E-128   | CHKB-CPT1B | -0.688954455 | 1.57E-05    |
| CEBPZ      | 0.885654932 | 2.92E-74    | PHLDB1     | -0.689288413 | 5.56E-12    |
| TRMT1      | 0.885603318 | 5.14E-71    | PIM1       | -0.689660551 | 1.71E-05    |
| NCL        | 0.885234256 | 4.00E-147   | CSKMT      | -0.689724358 | 9.08E-08    |
| LARP4      | 0.884239495 | 1.17E-130   | RWDD2A     | -0.691292768 | 6.32E-09    |
| MTHFD1L    | 0.884000218 | 8.25E-86    | AL031123.2 | -0.691472923 | 0.027152624 |
| BCL11B     | 0.882886441 | 1.24E-12    | PMEPA1     | -0.691520671 | 2.60E-83    |
| NOB1       | 0.882838987 | 1.23E-98    | TMCO3      | -0.691820664 | 1.02E-22    |
| PTDSS1     | 0.882444964 | 5.39E-112   | IER3       | -0.691843124 | 3.85E-33    |

|              |             |             |           |              |             |
|--------------|-------------|-------------|-----------|--------------|-------------|
| CDK8         | 0.880869975 | 1.33E-43    | TBC1D2    | -0.692717291 | 6.71E-11    |
| CD320        | 0.880805346 | 1.85E-40    | SDHAP3    | -0.693186162 | 0.006519705 |
| XYLB         | 0.880290645 | 6.17E-09    | SLC25A45  | -0.693229157 | 9.32E-05    |
| SIX1         | 0.880002897 | 1.86E-19    | VAMP1     | -0.693258442 | 0.000739763 |
| VPS9D1-AS1   | 0.87920076  | 8.06E-48    | PLEKHA2   | -0.693383713 | 4.36E-08    |
| DANCR        | 0.879089704 | 3.56E-60    | CYFIP2    | -0.693831174 | 1.43E-15    |
| DGAT2        | 0.876900686 | 3.15E-08    | IRS2      | -0.693911628 | 3.19E-09    |
| NUDT19       | 0.876465711 | 2.84E-37    | CD27-AS1  | -0.694005829 | 0.000515505 |
| Z83844.3     | 0.87627266  | 0.000376955 | PARD6A    | -0.69427476  | 1.03E-05    |
| FAM162A      | 0.875506024 | 5.35E-43    | PCAT7     | -0.694407466 | 6.23E-07    |
| C12orf45     | 0.875375509 | 1.96E-17    | C10orf143 | -0.694757729 | 0.001118761 |
| CFAP97       | 0.874908094 | 4.75E-67    | FIG4      | -0.694973117 | 2.25E-15    |
| CACYBP       | 0.874172456 | 9.71E-66    | SPSB4     | -0.695171853 | 0.032807974 |
| SAPCD2       | 0.873387875 | 1.52E-95    | CCDC71L   | -0.695403592 | 6.22E-10    |
| TMC8         | 0.872904865 | 0.003596138 | KLHL24    | -0.695534118 | 4.26E-11    |
| PSPH         | 0.87185691  | 1.58E-26    | ZNF362    | -0.696152522 | 1.10E-12    |
| MRPL36       | 0.871003472 | 2.09E-37    | ATF6B     | -0.69616818  | 9.92E-29    |
| TRIAP1       | 0.868740837 | 9.07E-36    | STX5      | -0.69630759  | 9.73E-25    |
| TAMM41       | 0.867325783 | 9.08E-26    | TMEM132A  | -0.696391719 | 9.94E-54    |
| DGUOK-AS1    | 0.866492343 | 0.000501153 | ARTN      | -0.696987161 | 0.007100428 |
| SLC25A22     | 0.866354971 | 8.59E-64    | MYL5      | -0.697029926 | 0.001308655 |
| ALKBH2       | 0.865666921 | 9.42E-39    | CADM1     | -0.697099495 | 7.84E-21    |
| YBX3         | 0.863719642 | 4.18E-100   | H1-2      | -0.697122587 | 3.75E-05    |
| FIRRE        | 0.863275005 | 4.54E-08    | TMEM129   | -0.697155133 | 4.70E-13    |
| AC125257.1   | 0.86278449  | 0.000193279 | FARP1     | -0.699149011 | 2.63E-32    |
| TMC5         | 0.862203049 | 7.17E-05    | SLC25A24  | -0.699575739 | 2.30E-73    |
| ADGRA3       | 0.861815822 | 2.89E-45    | KHNYN     | -0.699730215 | 2.63E-28    |
| MRPS12       | 0.861643116 | 1.87E-52    | PGAP6     | -0.700055346 | 2.05E-44    |
| RPRD1A       | 0.861474184 | 6.41E-84    | RTKN2     | -0.700807794 | 8.64E-10    |
| APTR         | 0.860843479 | 2.42E-15    | F8        | -0.700903188 | 0.002743843 |
| MTIF2        | 0.860251942 | 1.09E-60    | CAPN1     | -0.700925232 | 5.60E-84    |
| COX10        | 0.86021684  | 1.78E-17    | AGAP2     | -0.701309976 | 5.16E-14    |
| SPRY1        | 0.860208011 | 1.22E-07    | TMSB15B_1 | -0.701336081 | 0.041048487 |
| CDR2L        | 0.859936934 | 1.82E-45    | GLIPR2    | -0.701374077 | 0.000991152 |
| EXOSC4       | 0.858094544 | 2.33E-57    | CPE       | -0.701458099 | 1.88E-26    |
| PPAT         | 0.857569714 | 8.53E-68    | IRF2BPL   | -0.701491013 | 1.82E-61    |
| LRRC58       | 0.857247982 | 1.87E-97    | TINF2     | -0.701773331 | 7.04E-16    |
| EXOSC7       | 0.856206227 | 3.05E-28    | OTUB2     | -0.701801405 | 0.009037828 |
| TAF5         | 0.855465288 | 8.31E-14    | ZBTB46    | -0.701931093 | 2.80E-07    |
| PES1         | 0.855146944 | 3.41E-98    | N4BP2L1   | -0.70308753  | 0.016332733 |
| NOP56        | 0.853468898 | 2.77E-102   | WWC3      | -0.703257028 | 1.81E-60    |
| HELB         | 0.853357337 | 2.86E-08    | PTOV1-AS2 | -0.703415717 | 0.024398384 |
| ABCE1        | 0.852914073 | 6.59E-119   | CDC20B    | -0.703748609 | 0.000544047 |
| ZHX1-C8orf76 | 0.852345479 | 1.10E-05    | PDK2      | -0.704106972 | 1.51E-12    |
| MEST         | 0.851346002 | 5.64E-96    | OPN3      | -0.704367179 | 1.08E-10    |
| DHX37        | 0.85034933  | 1.05E-78    | MIR34AHG  | -0.704486132 | 0.000525472 |
| INTS10       | 0.849662127 | 1.38E-44    | IFT27     | -0.705048674 | 1.21E-10    |

|            |             |             |            |              |             |
|------------|-------------|-------------|------------|--------------|-------------|
| EPB41L4B   | 0.849371616 | 3.67E-57    | ZDHHC2     | -0.705239375 | 0.004830848 |
| PM20D2     | 0.848773218 | 1.05E-35    | AL365181.2 | -0.705421145 | 0.001116807 |
| DYRK3      | 0.848738267 | 1.13E-11    | SMPD1      | -0.705449422 | 5.61E-26    |
| AL161665.1 | 0.848706325 | 0.047002971 | GOLGB1     | -0.705585328 | 3.73E-55    |
| SLC27A4    | 0.848529961 | 1.02E-59    | AC112220.2 | -0.705683645 | 2.11E-05    |
| MPP3       | 0.848395582 | 2.36E-07    | CNKSR1     | -0.705780016 | 1.45E-08    |
| TUBGCP4    | 0.848289988 | 1.84E-40    | PGAP3      | -0.705832575 | 3.08E-07    |
| ADCY3      | 0.846510779 | 4.14E-75    | SLC22A15   | -0.705966098 | 4.94E-06    |
| TFAP4      | 0.845300186 | 1.74E-28    | PXDN       | -0.708302842 | 7.69E-45    |
| KDM4A-AS1  | 0.844960335 | 0.010132057 | ENPP1      | -0.708453987 | 3.48E-21    |
| DFFB       | 0.844640441 | 7.30E-08    | MALAT1     | -0.708803129 | 6.06E-43    |
| SNHG10     | 0.844579855 | 5.25E-18    | PHYH       | -0.70959715  | 3.03E-08    |
| NUDCD1     | 0.844333154 | 5.78E-94    | ACADS      | -0.709735735 | 1.60E-05    |
| RRP15      | 0.842820424 | 3.48E-29    | SPACA9     | -0.709795485 | 0.002125438 |
| MRPL3      | 0.84213863  | 7.85E-105   | GOLGA8N    | -0.709862703 | 0.019892359 |
| SCLY       | 0.84148306  | 8.73E-26    | TMEM198B   | -0.709995467 | 1.59E-06    |
| RSAD1      | 0.840803015 | 1.45E-61    | IQCD       | -0.710544551 | 0.006660541 |
| MYBBP1A    | 0.840177503 | 4.26E-102   | WDR91      | -0.711117287 | 6.23E-10    |
| GRK5       | 0.839417059 | 3.68E-07    | PPP3CB-AS1 | -0.711127014 | 0.006279793 |
| TYRO3      | 0.83884823  | 1.06E-25    | TSTD1      | -0.71198977  | 2.65E-14    |
| NDC1       | 0.838623461 | 1.92E-66    | MCOLN3     | -0.712028395 | 0.002734577 |
| TOMM5      | 0.838565337 | 1.05E-54    | DENND6B    | -0.712626464 | 5.15E-06    |
| ICAM5      | 0.838453909 | 0.000375137 | PLCD3      | -0.71305323  | 1.58E-56    |
| FKBP11     | 0.838016004 | 2.56E-22    | FZD7       | -0.713188417 | 0.000361703 |
| C12orf73   | 0.837957455 | 1.62E-12    | DTX3       | -0.71349103  | 6.62E-10    |
| NOP14      | 0.837556148 | 2.95E-77    | IGFLR1     | -0.713589614 | 0.02017191  |
| PINX1_2    | 0.837182802 | 2.32E-19    | JUN        | -0.713600597 | 9.46E-24    |
| ZNF511     | 0.836441791 | 3.98E-28    | REEP6      | -0.714414515 | 1.55E-08    |
| KTN1-AS1   | 0.835237409 | 1.65E-07    | TIMP1      | -0.714469789 | 4.99E-28    |
| SOD2_1     | 0.835028175 | 3.60E-55    | CPEB2      | -0.714594544 | 6.90E-05    |
| IL17D      | 0.833789825 | 6.04E-18    | CUL7       | -0.714668134 | 8.75E-32    |
| DNAJA3     | 0.833565619 | 3.18E-106   | LINC00888  | -0.714680272 | 9.54E-05    |
| CISD1      | 0.833498873 | 2.69E-23    | IL11RA     | -0.715210868 | 0.046890786 |
| MTRR       | 0.83185427  | 1.82E-22    | GLB1L      | -0.715329947 | 0.00122599  |
| TIMM21     | 0.831572529 | 2.89E-29    | TMEM35B    | -0.715347162 | 6.07E-05    |
| NXPH4      | 0.831166571 | 9.07E-12    | SDC3       | -0.715555899 | 9.49E-15    |
| LINC01311  | 0.83038185  | 0.00252794  | SLC2A11    | -0.716716501 | 6.63E-10    |
| SRPK1      | 0.830168487 | 4.71E-64    | SLC37A1    | -0.716808023 | 2.91E-40    |
| CUTC       | 0.82946661  | 3.09E-19    | GPR153     | -0.717052554 | 2.12E-06    |
| ENTR1      | 0.829131126 | 9.87E-74    | IKBKGP1    | -0.717358057 | 0.00294455  |
| NARS2      | 0.828110016 | 5.77E-33    | PINK1      | -0.717599674 | 1.87E-26    |
| NLE1       | 0.827736858 | 9.31E-28    | PEG10      | -0.71773191  | 4.73E-09    |
| AC146944.3 | 0.827521565 | 0.002080075 | BTN2A2     | -0.718098527 | 0.000414468 |
| GPT2       | 0.827438606 | 2.05E-59    | TRPV4      | -0.718130669 | 7.38E-06    |
| TANGO6     | 0.825130693 | 3.14E-18    | CTAGE4     | -0.71820279  | 0.000832351 |
| FAM156B    | 0.825107241 | 2.55E-05    | RHOU       | -0.718513945 | 2.66E-14    |
| CTSC       | 0.824678607 | 2.07E-23    | SLC44A3    | -0.718514332 | 0.000824129 |

|            |             |             |            |              |             |
|------------|-------------|-------------|------------|--------------|-------------|
| NFIA       | 0.82340629  | 6.24E-17    | TMEM63A    | -0.718787887 | 1.65E-28    |
| FAM210A    | 0.823358658 | 1.13E-35    | KAT2B      | -0.71941412  | 1.03E-20    |
| PPM1J      | 0.823142843 | 0.001427762 | MIDN       | -0.720276272 | 1.08E-64    |
| MRPS23     | 0.822990001 | 2.27E-66    | CYLD       | -0.720780105 | 1.69E-14    |
| REXO2      | 0.822609578 | 3.65E-26    | TCEA2      | -0.720816907 | 9.26E-15    |
| IKZF5      | 0.822139546 | 2.47E-30    | AP002761.4 | -0.720963588 | 1.93E-16    |
| SEPTIN6    | 0.821958083 | 0.002328581 | RNFT2      | -0.721173917 | 1.13E-05    |
| ARL6       | 0.821809676 | 6.88E-09    | HOTAIR     | -0.721706887 | 0.025393617 |
| FAM189B    | 0.821412988 | 5.46E-36    | ANXA2      | -0.721826096 | 1.40E-95    |
| IPO5       | 0.821131009 | 4.15E-95    | ZNF75D     | -0.722225329 | 3.83E-16    |
| THAP2      | 0.820869504 | 0.000297063 | USP46-AS1  | -0.722338981 | 0.003201709 |
| XPO5       | 0.819695482 | 1.59E-104   | NBPF4      | -0.723496246 | 0.000134368 |
| ADSL       | 0.819622052 | 2.08E-72    | SOX4       | -0.723584629 | 6.26E-41    |
| ENTPD1-AS1 | 0.818012972 | 1.18E-23    | NPHP3      | -0.723757049 | 5.88E-11    |
| BOD1       | 0.817615448 | 4.70E-66    | C1orf115   | -0.724283386 | 4.32E-07    |
| PDCD11     | 0.815812045 | 4.67E-81    | CNFN       | -0.724289304 | 0.037039852 |
| PEX5       | 0.814970551 | 1.59E-46    | FREM2      | -0.724418289 | 1.10E-20    |
| RFESD      | 0.814052566 | 0.005264993 | S100A6     | -0.724523969 | 2.54E-33    |
| AHCTF1     | 0.813333163 | 2.23E-71    | RAB5B      | -0.724644886 | 1.94E-55    |
| PRPS1      | 0.812731651 | 3.55E-67    | S100A9     | -0.725092698 | 0.002390025 |
| HEATR1     | 0.812377184 | 1.43E-69    | RTL8C      | -0.725097923 | 8.46E-40    |
| COA7       | 0.812307855 | 3.71E-45    | SRRM2-AS1  | -0.725549238 | 0.005971486 |
| ZNRF2P1    | 0.811927555 | 0.000335976 | ZNF750     | -0.725669167 | 0.011314412 |
| QRSL1      | 0.81153395  | 5.58E-25    | PPDPF      | -0.726270477 | 7.70E-59    |
| UTP15      | 0.811250025 | 7.68E-45    | SNX21      | -0.726580313 | 4.45E-17    |
| MBLAC2     | 0.809842693 | 3.85E-15    | GLRX       | -0.727150866 | 0.011549464 |
| FBRSL1     | 0.80934377  | 2.06E-88    | ATG16L2    | -0.727172952 | 2.00E-11    |
| RPL23AP82  | 0.808921385 | 1.02E-13    | GRHL3      | -0.727291229 | 6.62E-40    |
| DLAT       | 0.808882948 | 4.30E-53    | MYL6       | -0.727696337 | 6.59E-110   |
| SKP2       | 0.80776896  | 1.93E-13    | HECW2      | -0.728117731 | 0.000156862 |
| CCDC112    | 0.807227634 | 1.23E-12    | TUFT1      | -0.728356554 | 5.75E-35    |
| DIAPH2     | 0.806725718 | 1.31E-23    | LINC01001  | -0.728556253 | 0.005942497 |
| AKAP1      | 0.806518284 | 1.14E-85    | JMJD1C-AS1 | -0.728587729 | 0.033319116 |
| TRIP13     | 0.806268964 | 2.15E-30    | ZDHHC12    | -0.728808183 | 3.92E-29    |
| TIPIN      | 0.805982847 | 2.57E-21    | NUCB2      | -0.728925819 | 3.23E-32    |
| EXOSC5     | 0.805443484 | 8.84E-46    | ANO9       | -0.729046849 | 6.02E-10    |
| TOMM40     | 0.804191779 | 4.54E-94    | GPRASP1    | -0.729441883 | 0.040347527 |
| UBIAD1     | 0.803708724 | 8.12E-22    | AC026748.3 | -0.729532293 | 0.000242956 |
| DHODH      | 0.803168373 | 2.19E-26    | MGLL       | -0.729795489 | 2.22E-10    |
| SHLD3      | 0.80245723  | 0.000150685 | IGF1R      | -0.729806248 | 2.00E-50    |
| NGDN       | 0.802281016 | 1.43E-28    | PIEZO1     | -0.730191083 | 1.24E-87    |
| STK26      | 0.802218707 | 1.93E-60    | MTHFR      | -0.730241968 | 5.46E-10    |
| DBF4P1     | 0.801724399 | 0.006083011 | OLFM1      | -0.730474111 | 4.38E-29    |
| NOL8       | 0.801562705 | 1.94E-52    | AC093512.2 | -0.730846496 | 7.32E-07    |
| MAD2L1     | 0.801511635 | 1.50E-56    | MEAK7      | -0.731161884 | 2.60E-17    |
| AC018645.3 | 0.800834265 | 0.021347566 | GALNT12    | -0.731314502 | 1.00E-07    |
| GTPBP4     | 0.800260584 | 1.02E-81    | DISP1      | -0.731650689 | 0.008192574 |

|            |             |             |            |              |             |
|------------|-------------|-------------|------------|--------------|-------------|
| RBM19      | 0.800193417 | 1.01E-39    | MXD3       | -0.731765618 | 3.43E-17    |
| RMRP_2     | 0.799509929 | 0.002192081 | MVD        | -0.732071127 | 2.67E-32    |
| PA2G4      | 0.798146814 | 8.51E-125   | GRN        | -0.732117944 | 1.79E-65    |
| SLC45A3    | 0.798072747 | 4.33E-09    | LINC01138  | -0.732148356 | 0.014074348 |
| TBRG4      | 0.797835172 | 2.06E-72    | AAMDC      | -0.732376959 | 0.000147687 |
| NKD2       | 0.797199244 | 2.00E-05    | CPT1B      | -0.733241123 | 1.18E-08    |
| RRP12      | 0.79713335  | 8.80E-70    | RAPGEF2    | -0.733250803 | 9.19E-44    |
| METTL5     | 0.797069124 | 7.26E-30    | PDGFA      | -0.733683943 | 2.52E-13    |
| GFM1       | 0.79682094  | 1.39E-75    | ZNF311     | -0.734038964 | 0.021889704 |
| CTPS1      | 0.796796101 | 1.14E-77    | FKBP2      | -0.735110251 | 2.66E-20    |
| ENAH       | 0.796503531 | 2.51E-48    | MINDY1     | -0.73540275  | 9.37E-09    |
| HSPA14_2   | 0.79576732  | 4.26E-32    | RAB8B      | -0.735415326 | 2.86E-10    |
| PGAM5      | 0.795296851 | 6.94E-82    | AGO4       | -0.735558599 | 2.26E-07    |
| NAA15      | 0.795090834 | 3.82E-85    | CCDC102A   | -0.73568212  | 3.04E-05    |
| FKBP4      | 0.794407801 | 6.28E-120   | HEYL       | -0.735943061 | 0.003953179 |
| MRPS27     | 0.794272529 | 7.00E-79    | GRAMD2B    | -0.736104582 | 2.13E-12    |
| MEMO1      | 0.794083668 | 7.37E-40    | SLITRK6    | -0.73688922  | 0.000265014 |
| NAA50      | 0.793937388 | 1.08E-147   | ALPK1      | -0.736905635 | 1.56E-05    |
| TMEM70     | 0.793579979 | 3.64E-33    | ROGDI      | -0.73703567  | 3.44E-22    |
| MRPS5      | 0.792867734 | 2.79E-53    | LINC01547  | -0.737068588 | 1.19E-09    |
| SUV39H2    | 0.792860044 | 7.63E-43    | CLTCL1     | -0.737334481 | 0.000119214 |
| EIF5       | 0.792175132 | 1.13E-143   | AL031777.2 | -0.737502337 | 0.041700073 |
| UTP4       | 0.792135752 | 2.54E-94    | DUSP1      | -0.737911375 | 4.18E-17    |
| GALK2      | 0.791684347 | 3.66E-19    | SAMD15     | -0.738013294 | 7.87E-06    |
| AL139353.1 | 0.79109856  | 0.027046958 | PCED1A     | -0.738448185 | 4.42E-13    |
| POP7       | 0.790735516 | 1.25E-54    | BACE1      | -0.738500055 | 3.30E-46    |
| UAP1       | 0.789762562 | 5.82E-42    | LFNG       | -0.739845993 | 1.44E-15    |
| C15orf61   | 0.789677119 | 6.42E-10    | H2BC8      | -0.740937584 | 0.000188964 |
| ZNF770     | 0.788183715 | 3.35E-42    | PLXND1     | -0.740974291 | 6.13E-34    |
| DKC1       | 0.788112321 | 9.66E-72    | SRCIN1     | -0.741173798 | 1.87E-09    |
| DTX4       | 0.788103268 | 1.03E-10    | TTLL1      | -0.741245266 | 4.07E-06    |
| RCL1       | 0.787212103 | 5.40E-29    | CCDC162P   | -0.741505867 | 0.001387519 |
| PDXP       | 0.786922531 | 3.06E-31    | P2RX4      | -0.742235331 | 4.85E-21    |
| C20orf27   | 0.7855568   | 4.04E-71    | NEK11      | -0.7423966   | 2.10E-05    |
| L3HYPDH    | 0.784872554 | 3.59E-21    | ANO6       | -0.742788903 | 1.04E-46    |
| ALDH1B1    | 0.784743814 | 7.31E-36    | PROM2      | -0.742918376 | 1.31E-56    |
| ARMC6      | 0.783594165 | 7.70E-59    | GTF2IP13   | -0.743645573 | 0.004470696 |
| KARS1      | 0.783385332 | 4.05E-112   | LMTK3      | -0.74371304  | 2.57E-12    |
| FAH        | 0.783187129 | 3.13E-16    | FGFR2      | -0.74387893  | 3.50E-24    |
| ACAT1      | 0.782976527 | 2.05E-35    | S100A13    | -0.744005518 | 6.93E-50    |
| LINC-PINT  | 0.782723375 | 0.01988894  | LMF2       | -0.744056308 | 2.51E-31    |
| AP001505.1 | 0.781935716 | 0.002736259 | PCDHGB5    | -0.744511912 | 1.02E-11    |
| HSPA9      | 0.78192604  | 5.76E-108   | C5orf38    | -0.744667288 | 1.25E-11    |
| ELOA       | 0.781420581 | 3.92E-53    | S100A14    | -0.744974854 | 1.42E-52    |
| STC2       | 0.781361514 | 1.83E-54    | ACTR1B     | -0.745271689 | 3.26E-35    |
| LYRM7      | 0.781230488 | 3.01E-15    | DGKQ       | -0.74535583  | 1.90E-12    |
| SLIRP      | 0.78052347  | 5.79E-38    | TRIM34     | -0.746182851 | 0.000786635 |

|            |             |             |            |              |             |
|------------|-------------|-------------|------------|--------------|-------------|
| SLC19A1    | 0.780516485 | 6.90E-51    | CALCOCO1   | -0.746274882 | 1.69E-19    |
| WDR75      | 0.78049632  | 8.23E-59    | PRSS27     | -0.746677111 | 0.029844612 |
| HSPE1-MOB4 | 0.780386961 | 0.045872843 | TMEM219    | -0.747697505 | 1.07E-13    |
| TTLL12     | 0.779950299 | 3.35E-104   | MRAS       | -0.748368589 | 0.007828533 |
| YARS1      | 0.779346801 | 5.68E-84    | H4C15      | -0.748521466 | 0.004026235 |
| MRPL15     | 0.779186988 | 1.39E-49    | SYTL1      | -0.748547983 | 2.97E-09    |
| RHEBL1     | 0.778940042 | 0.02067077  | ARSI       | -0.749451122 | 1.47E-05    |
| MRPS17     | 0.77851611  | 2.87E-18    | ZIC4       | -0.749515877 | 0.000712273 |
| PRMT1      | 0.778246968 | 3.71E-102   | ST3GAL3    | -0.749834033 | 0.003069923 |
| RRN3       | 0.778118338 | 1.53E-71    | AL499602.1 | -0.75022565  | 5.95E-05    |
| PAM16      | 0.777452562 | 2.91E-25    | AR         | -0.750467301 | 0.000271693 |
| TRMT10C    | 0.776519197 | 1.64E-36    | PLEK2      | -0.750890093 | 3.02E-05    |
| PPP2R1B    | 0.776272772 | 9.33E-28    | MAN1C1     | -0.7510807   | 0.017914986 |
| NSUN2      | 0.776120382 | 1.52E-67    | SEC14L2    | -0.751542344 | 1.11E-06    |
| PUS1       | 0.775994839 | 3.60E-41    | AC093673.1 | -0.751688042 | 0.016658064 |
| TTYH2      | 0.775939731 | 0.015752118 | ARRDC3     | -0.751758806 | 1.29E-05    |
| MCAT       | 0.775595663 | 2.37E-25    | ARHGAP42   | -0.752506533 | 0.000818982 |
| AMD1       | 0.77521606  | 1.23E-94    | SPTSSB     | -0.752701817 | 6.78E-145   |
| ISCA1      | 0.775149407 | 4.73E-54    | MBNL2      | -0.753504545 | 4.73E-21    |
| RRAS2      | 0.774965755 | 1.33E-38    | PCDHGB1    | -0.754101847 | 0.000258645 |
| TATDN2     | 0.773778277 | 3.12E-71    | TES        | -0.754526467 | 1.90E-29    |
| CALML4     | 0.773504325 | 0.003049647 | VPS37D     | -0.754578649 | 0.003198248 |
| NOCT       | 0.772774119 | 2.09E-13    | NCAM2      | -0.75521818  | 9.23E-27    |
| FKBP14     | 0.771746504 | 1.58E-19    | UTRN       | -0.755288512 | 1.22E-27    |
| DCTPP1     | 0.771161369 | 1.41E-99    | SLC24A1    | -0.756049311 | 9.20E-15    |
| SRXN1      | 0.770429461 | 1.25E-52    | UBE2Q2P1   | -0.75646039  | 0.010993625 |
| CBR1       | 0.770342019 | 2.86E-61    | PRSS30P    | -0.756545417 | 0.001719258 |
| AC011462.5 | 0.769887054 | 0.013398986 | FRS3       | -0.757118563 | 0.004707667 |
| GARS1      | 0.769721749 | 2.96E-83    | CTDSP2     | -0.757191274 | 4.52E-51    |
| GTF2H2C    | 0.76869193  | 9.78E-43    | SLX1B      | -0.757301041 | 1.46E-29    |
| CLNS1A     | 0.768659347 | 1.01E-77    | TTC30B     | -0.757482868 | 1.04E-06    |
| F12        | 0.768528038 | 6.26E-21    | TRIM5      | -0.757607159 | 8.21E-10    |
| URB2       | 0.768465734 | 1.07E-30    | TRIM16     | -0.75779605  | 2.02E-35    |
| GNL3       | 0.768237521 | 2.45E-71    | SEPTIN1    | -0.758214377 | 0.049991882 |
| RAI14      | 0.767808956 | 4.48E-18    | ANGPTL4    | -0.75855144  | 2.39E-11    |
| SPHK1      | 0.766706893 | 2.66E-34    | SLC31A2    | -0.758721128 | 2.02E-08    |
| ENOPH1     | 0.766697866 | 4.41E-64    | CFAP44     | -0.758750859 | 9.61E-08    |
| OTUD6B     | 0.766431191 | 1.00E-32    | SGCB       | -0.758928465 | 2.23E-12    |
| UTP6       | 0.766307362 | 6.41E-34    | HLA-C      | -0.759135414 | 7.09E-56    |
| NR4A3      | 0.765141678 | 9.15E-06    | C20orf204  | -0.759179764 | 0.026386712 |
| EIF5A      | 0.764971568 | 1.52E-111   | CDKN2D     | -0.75965292  | 0.000470477 |
| EMC8       | 0.764728904 | 5.61E-45    | PLAUR      | -0.760368554 | 6.56E-05    |
| NOP58      | 0.764019911 | 1.61E-72    | EIF4E3     | -0.760545439 | 1.83E-15    |
| GTPBP10    | 0.763585267 | 1.29E-41    | MFGF8      | -0.761162811 | 9.37E-08    |
| SHLD2      | 0.763377551 | 1.62E-43    | ARL4C      | -0.761368094 | 1.63E-09    |
| DDX51      | 0.761784954 | 2.19E-33    | ADGRB2     | -0.761678943 | 0.006952269 |
| MRPL4      | 0.761772635 | 3.00E-64    | LARP6      | -0.761750037 | 0.000102729 |

|            |             |             |              |              |             |
|------------|-------------|-------------|--------------|--------------|-------------|
| TSR1       | 0.761752335 | 2.05E-67    | MARCHF2      | -0.761804036 | 3.09E-08    |
| TTC27      | 0.761329049 | 2.67E-28    | PLA2G6       | -0.761879297 | 3.21E-05    |
| DFFA       | 0.760550614 | 7.74E-52    | KLF4         | -0.762024294 | 8.61E-30    |
| LRRC59     | 0.760523302 | 1.60E-104   | PODNL1       | -0.762602729 | 0.001637309 |
| NHP2       | 0.757590295 | 3.88E-100   | IL4R         | -0.762887397 | 2.86E-21    |
| TMED5      | 0.756637296 | 4.71E-40    | PYCARD       | -0.762943193 | 5.35E-21    |
| ZNF598     | 0.75611909  | 1.15E-74    | CRABP2       | -0.762954791 | 1.00E-86    |
| WDR77      | 0.755841644 | 4.85E-60    | NPAS2        | -0.763050756 | 1.71E-30    |
| PTPN2      | 0.755153017 | 1.73E-37    | RIBC2        | -0.763064962 | 0.000157978 |
| GPR135     | 0.754780236 | 0.004988853 | LRRC23       | -0.763971334 | 0.000910481 |
| SIAH2      | 0.753927595 | 2.52E-44    | TVP23C       | -0.764165977 | 0.016505543 |
| MND1       | 0.753631189 | 7.28E-13    | ITGB5        | -0.765432375 | 2.96E-98    |
| ISM1       | 0.753508242 | 0.008606522 | KLRG2        | -0.765660195 | 0.03167788  |
| METAP2     | 0.753088405 | 2.03E-67    | AP3B2        | -0.765709038 | 0.019524946 |
| FKBP5      | 0.752788477 | 3.70E-46    | SPRY4        | -0.76669535  | 5.39E-06    |
| AC012676.1 | 0.752373938 | 0.025713984 | GRB7         | -0.766710888 | 7.09E-12    |
| NME1       | 0.752334389 | 1.65E-74    | IFI35        | -0.766821825 | 4.75E-06    |
| KHDRBS3    | 0.751233575 | 5.77E-05    | PHC1P1       | -0.768167671 | 0.013526643 |
| IPO11      | 0.75075318  | 2.67E-42    | ZNF497       | -0.768534673 | 4.93E-05    |
| FAM72B     | 0.750672214 | 8.49E-05    | PRPH         | -0.768670883 | 0.020031783 |
| RDH13      | 0.74958844  | 1.81E-22    | SHISA2       | -0.768702317 | 0.017637738 |
| NOP2       | 0.749424207 | 2.95E-49    | BASP1        | -0.768872593 | 7.58E-64    |
| LARP1B     | 0.749334778 | 1.93E-25    | FAM47E-STBD1 | -0.769499383 | 0.000245184 |
| PARBPB     | 0.749318151 | 1.25E-22    | SPIRE2       | -0.769861545 | 3.83E-15    |
| XRCC2      | 0.748429443 | 4.54E-29    | SNED1        | -0.770008071 | 0.003137192 |
| ABCF2_2    | 0.74824325  | 4.98E-79    | RPS10P7      | -0.770477783 | 0.004084793 |
| ARC        | 0.74813936  | 0.00193275  | AL022069.3   | -0.771291862 | 0.026534414 |
| NOC2L      | 0.747870936 | 3.96E-88    | CELSR2       | -0.771354315 | 1.81E-14    |
| METAP1     | 0.747020378 | 2.04E-56    | CREB3L4      | -0.771890385 | 2.95E-25    |
| PAICS      | 0.746496786 | 5.03E-90    | HEXD         | -0.771995878 | 4.74E-12    |
| RTN4IP1    | 0.746335922 | 2.41E-11    | ALDH4A1      | -0.772615459 | 6.29E-25    |
| AC022966.1 | 0.745564628 | 4.28E-53    | CALHM2       | -0.773074094 | 3.01E-17    |
| SRPX       | 0.745006938 | 0.00590037  | EFHC1        | -0.773549351 | 5.78E-13    |
| SMG1P1     | 0.744682831 | 0.000128559 | TMEM234      | -0.773595873 | 0.000173752 |
| DDX31      | 0.744676848 | 4.99E-35    | SLC4A11      | -0.773752647 | 1.10E-08    |
| NAA25      | 0.74384152  | 8.69E-46    | GALNT10      | -0.773888549 | 1.62E-70    |
| HDHD5      | 0.743120851 | 4.76E-53    | GPR158       | -0.774177396 | 0.003909965 |
| NAMPT      | 0.742975141 | 1.65E-99    | PRKCZ        | -0.774526287 | 9.54E-20    |
| GEMIN4     | 0.742974287 | 4.07E-52    | LASP1        | -0.774687491 | 4.11E-73    |
| WDR35      | 0.742860095 | 2.45E-23    | EPPK1        | -0.77469278  | 2.01E-09    |
| HSD11B2    | 0.741524721 | 0.004439645 | TRPT1        | -0.775477827 | 3.96E-19    |
| TCP1       | 0.741488293 | 2.38E-70    | C1orf226     | -0.775498308 | 4.88E-15    |
| TOMM34     | 0.741169902 | 5.53E-50    | AC133644.3   | -0.775599111 | 0.000159235 |
| KDM1A      | 0.74030394  | 1.39E-47    | CCN1         | -0.775765147 | 5.70E-24    |
| TBC1D14    | 0.739918084 | 2.66E-53    | EPS8L2       | -0.776046499 | 3.40E-18    |
| RBM38      | 0.739751435 | 7.66E-56    | ILDR1        | -0.776089658 | 4.91E-05    |
| AC005831.1 | 0.739613732 | 0.023718936 | ERBB2        | -0.77641522  | 4.27E-77    |

|          |             |             |            |              |             |
|----------|-------------|-------------|------------|--------------|-------------|
| DTWD1    | 0.739371548 | 6.60E-29    | TTC30A     | -0.776955769 | 1.48E-05    |
| EXOSC3   | 0.739233492 | 2.74E-26    | HBP1       | -0.777217254 | 5.72E-45    |
| UTP23    | 0.739178133 | 4.70E-28    | AC068888.1 | -0.777262283 | 1.17E-41    |
| FZD9     | 0.738957005 | 0.007349074 | CHMP2A     | -0.777507959 | 4.50E-41    |
| ZNRF3    | 0.738829281 | 2.04E-16    | SLC25A35   | -0.777592308 | 0.017334449 |
| ZC3H15   | 0.738117733 | 2.18E-62    | LRRC46     | -0.777642445 | 0.017423903 |
| FAM53B   | 0.737877786 | 8.31E-43    | MARC2      | -0.777656979 | 0.002644052 |
| SLC18B1  | 0.737564412 | 9.28E-20    | AC004816.1 | -0.778587326 | 9.93E-08    |
| GART     | 0.737403879 | 2.70E-71    | GNAO1      | -0.778770879 | 0.023997622 |
| UNC5B    | 0.737234393 | 0.000598872 | ALDH6A1    | -0.778793769 | 1.84E-25    |
| QSOX2    | 0.737098528 | 1.53E-52    | DHRS2      | -0.778803211 | 4.89E-08    |
| NUS1     | 0.736624213 | 1.03E-77    | RORA       | -0.778834835 | 0.000368964 |
| CERS1    | 0.736518799 | 1.24E-08    | ADAP2      | -0.779219953 | 0.03487717  |
| NAT10    | 0.736322942 | 7.39E-73    | BBOF1      | -0.77934811  | 1.70E-06    |
| KNSTRN   | 0.73605372  | 1.01E-19    | PAQR8      | -0.77961317  | 0.008813613 |
| NR1D2    | 0.735994043 | 2.67E-37    | PDGFB      | -0.779858659 | 5.16E-28    |
| IMP3     | 0.735827182 | 1.48E-44    | STARD4     | -0.780040578 | 1.10E-07    |
| UTP25    | 0.735291345 | 8.44E-23    | CLDN4      | -0.78010931  | 1.63E-78    |
| RBM18    | 0.735052387 | 2.15E-29    | CCDC74A    | -0.780355405 | 0.009514116 |
| ME2      | 0.735030237 | 4.95E-22    | PHLDB3     | -0.780536419 | 5.88E-09    |
| SAAL1    | 0.734781474 | 2.47E-21    | SMPDL3A    | -0.780768289 | 3.95E-08    |
| ZNRD2    | 0.734529967 | 8.28E-26    | MAPK8IP1   | -0.780865807 | 0.00020918  |
| NOL11    | 0.734434001 | 8.06E-79    | ANKRD9     | -0.780945751 | 1.50E-30    |
| C8orf33  | 0.733456377 | 5.57E-65    | DMPK       | -0.781254474 | 1.65E-46    |
| ZNF331   | 0.733121466 | 2.36E-11    | SH3BP5-AS1 | -0.781778803 | 1.39E-06    |
| YARS2    | 0.733042794 | 4.95E-18    | VMO1       | -0.782106751 | 0.042943986 |
| IL27RA   | 0.732919804 | 9.27E-20    | PLA2G15    | -0.782415371 | 1.68E-23    |
| SLC5A3   | 0.732816833 | 1.00E-20    | FHL1       | -0.782570087 | 0.035470363 |
| IFRD2    | 0.73263097  | 4.92E-63    | ZFP36      | -0.78260226  | 2.40E-14    |
| KDM1B    | 0.732219631 | 3.29E-21    | GPR173     | -0.783140211 | 0.007154983 |
| AIMP2    | 0.732115416 | 7.82E-38    | TRIM38     | -0.783219844 | 1.64E-09    |
| NEIL2    | 0.732114368 | 1.86E-12    | SRRM3      | -0.783664727 | 2.27E-06    |
| SDAD1    | 0.731167653 | 5.74E-50    | TMEM45A    | -0.783707668 | 0.030467287 |
| DBF4     | 0.730578377 | 1.35E-54    | AC008556.1 | -0.783739975 | 0.001608018 |
| ARL5A    | 0.730217135 | 3.77E-45    | PRKACB     | -0.784334619 | 0.000139961 |
| TMEM201  | 0.730140101 | 5.21E-30    | MAPRE3     | -0.784571772 | 8.53E-10    |
| ETF1     | 0.729650912 | 5.56E-92    | SWT1       | -0.784899686 | 0.023639927 |
| ABCF2_1  | 0.729628667 | 1.95E-50    | CRIP2      | -0.784917789 | 4.25E-45    |
| XPO4     | 0.729628506 | 1.62E-39    | EPHX2      | -0.785156605 | 0.008539769 |
| EBNA1BP2 | 0.729401297 | 3.87E-67    | VAMP5      | -0.785212274 | 0.000165575 |
| KPNA3    | 0.729302216 | 7.94E-48    | PDE9A      | -0.785224917 | 1.64E-08    |
| PFDN4    | 0.728626578 | 7.78E-66    | CCDC120    | -0.785611293 | 8.82E-27    |
| CUL4A    | 0.728510102 | 5.98E-53    | AC023509.1 | -0.785663704 | 0.000315103 |
| MFHAS1   | 0.727344892 | 2.62E-28    | OSBPL7     | -0.785841556 | 9.24E-13    |
| SLC25A12 | 0.727256266 | 4.96E-11    | ADM        | -0.787009717 | 2.92E-11    |
| TSFM     | 0.72662754  | 2.69E-36    | SPPL2B     | -0.787077218 | 1.70E-16    |
| SMAD1    | 0.726597819 | 2.55E-17    | ARMCX3     | -0.787344657 | 3.77E-22    |



|              |             |             |            |              |             |
|--------------|-------------|-------------|------------|--------------|-------------|
| RWDD4        | 0.726294907 | 1.12E-29    | FAM167A    | -0.78799408  | 0.00526904  |
| RFK          | 0.72623949  | 2.59E-47    | SMIM29     | -0.788877241 | 1.55E-10    |
| XPO6         | 0.724732559 | 1.53E-90    | MAN2B1     | -0.789201475 | 4.28E-43    |
| POLG2        | 0.724287038 | 1.82E-19    | TSPAN14    | -0.789773606 | 5.47E-82    |
| FOXO3B       | 0.723703763 | 1.12E-06    | CORO1B     | -0.789883434 | 1.15E-64    |
| ZDHHC9       | 0.723485689 | 7.97E-64    | BNIP3L     | -0.791533742 | 3.46E-36    |
| SCO1         | 0.723320308 | 1.41E-32    | GYG2       | -0.791940779 | 0.032752399 |
| RITA1        | 0.723024371 | 1.89E-42    | LYSMD4     | -0.792051603 | 5.10E-09    |
| TPST2        | 0.722333638 | 6.62E-16    | SLC4A8     | -0.792194024 | 6.32E-08    |
| B4GALT3      | 0.721873735 | 2.33E-35    | TMEM238    | -0.792879349 | 1.81E-08    |
| HSD17B6      | 0.721832094 | 0.009044319 | ERRFI1     | -0.793586773 | 8.00E-58    |
| NDUF5AF5     | 0.721201265 | 3.65E-12    | COPZ2      | -0.793703992 | 9.57E-11    |
| ANKRD27      | 0.71963832  | 4.39E-54    | DNASE1L1   | -0.793857344 | 2.42E-25    |
| UBA2         | 0.719490149 | 1.22E-82    | ZNF703     | -0.794204729 | 5.60E-47    |
| RMND5A       | 0.71922911  | 1.89E-32    | ACSF2      | -0.794861978 | 2.38E-23    |
| TEAD4        | 0.71889431  | 8.40E-20    | GALC       | -0.795082292 | 0.007339064 |
| RNF8         | 0.718773397 | 1.82E-22    | ZSCAN31    | -0.79522219  | 0.010791761 |
| DUS2         | 0.718647581 | 3.13E-22    | PRSS22     | -0.795309845 | 5.19E-21    |
| RAPGEF5      | 0.718181341 | 1.17E-05    | ETHE1      | -0.796289627 | 1.24E-06    |
| IFI30        | 0.718086754 | 2.92E-42    | FAM3C2     | -0.796318791 | 0.000121833 |
| PLIN2        | 0.717926898 | 1.37E-05    | TSPAN5     | -0.796748648 | 1.78E-06    |
| NTMT1        | 0.717761574 | 4.83E-45    | XBP1       | -0.796786472 | 4.24E-26    |
| MRPL30       | 0.717754561 | 7.60E-40    | MAFA       | -0.79776809  | 2.65E-05    |
| DCAF4        | 0.717701791 | 3.72E-34    | RGL2       | -0.79801008  | 5.13E-64    |
| HSPE1        | 0.717488324 | 8.43E-60    | AIFM3      | -0.798191585 | 0.000364618 |
| UNG          | 0.71679982  | 6.76E-78    | RDX        | -0.798232709 | 2.61E-141   |
| CRLS1        | 0.716183386 | 5.79E-26    | LIMCH1     | -0.79830426  | 9.98E-42    |
| KANK1        | 0.715317569 | 1.18E-29    | HOMER3     | -0.799027951 | 9.51E-21    |
| CDK5R1       | 0.715249433 | 0.000566985 | HSPB8      | -0.799095768 | 1.40E-36    |
| PPA1         | 0.714922615 | 7.31E-67    | AC006128.1 | -0.799630969 | 1.42E-05    |
| ATP6V0E2-AS1 | 0.714711786 | 0.001656126 | WDR78      | -0.799875974 | 0.025329446 |
| NAGPA        | 0.713604374 | 9.70E-16    | INHBB      | -0.799877107 | 1.53E-71    |
| TIMM22       | 0.712841897 | 3.25E-24    | HID1       | -0.800238133 | 6.51E-74    |
| MDN1         | 0.712439643 | 1.66E-32    | ZFP36L2    | -0.800618611 | 4.76E-125   |
| PRTG         | 0.711675533 | 2.12E-06    | ZNF385A    | -0.800680249 | 1.21E-36    |
| LRPPRC       | 0.71133858  | 6.53E-102   | NDUFA6-DT  | -0.800743274 | 0.000352391 |
| EIF2A        | 0.71068193  | 1.14E-61    | H2AC19     | -0.800917338 | 1.50E-24    |
| ZNF330       | 0.710525955 | 8.31E-29    | GOLGA6L5P  | -0.800957336 | 6.26E-06    |
| FYN          | 0.709962698 | 0.001099296 | TFF3       | -0.801335704 | 3.32E-07    |
| SSB          | 0.709891028 | 7.31E-76    | SYCP2      | -0.80260326  | 9.76E-21    |
| IARS1        | 0.709842003 | 2.68E-122   | STARD13    | -0.802672895 | 1.22E-05    |
| MRPL45       | 0.709740744 | 3.39E-29    | FOXJ1      | -0.803345496 | 0.009015209 |
| POP1         | 0.709508118 | 1.29E-41    | PTGR1      | -0.803381549 | 0.00132788  |
| UBE2S        | 0.709491655 | 6.95E-65    | SH3TC2     | -0.803509076 | 0.008130328 |
| SMYD5        | 0.709157502 | 4.03E-33    | CROT       | -0.803780326 | 4.17E-15    |
| MRPS26       | 0.709071171 | 2.00E-41    | DAPK1      | -0.803850909 | 0.009638238 |
| URI1         | 0.708840594 | 1.58E-63    | RAB43      | -0.803934497 | 2.91E-20    |

|            |             |             |              |              |             |
|------------|-------------|-------------|--------------|--------------|-------------|
| AC012146.1 | 0.708669057 | 0.035698288 | ASB16-AS1    | -0.804539785 | 0.000107241 |
| LRRC8D     | 0.708231467 | 6.59E-31    | ARHGEF10L    | -0.80598969  | 2.57E-14    |
| THRA       | 0.707782194 | 7.71E-05    | GDPGP1       | -0.806649471 | 0.001248628 |
| PLK1       | 0.707536295 | 1.94E-87    | UBALD2       | -0.80726205  | 1.23E-27    |
| URB1       | 0.70748369  | 4.90E-49    | LRRC56       | -0.807349084 | 0.001382311 |
| CHCHD10    | 0.706473518 | 1.16E-23    | MISP3        | -0.807351741 | 4.83E-11    |
| WASF3      | 0.706347181 | 6.27E-12    | H2AC6        | -0.807409564 | 4.91E-18    |
| MTPAP      | 0.706209702 | 5.75E-27    | GPC1         | -0.807463066 | 2.04E-22    |
| SLC25A26   | 0.705933641 | 1.84E-16    | PPP1R13L     | -0.807680628 | 1.74E-37    |
| DDX18      | 0.70567669  | 9.32E-72    | PPP1R14B-AS1 | -0.807799832 | 0.002589063 |
| GPR180     | 0.703906673 | 1.60E-15    | LHPP         | -0.808207547 | 3.99E-11    |
| TFAM       | 0.702706541 | 1.04E-53    | AC034193.1   | -0.808338418 | 0.008986773 |
| POLR1D     | 0.702348325 | 1.97E-49    | KIF3C        | -0.809142221 | 5.89E-09    |
| SBDSP1     | 0.701770009 | 7.79E-26    | MOB3C        | -0.809495335 | 7.33E-08    |
| EBPL       | 0.700983793 | 1.67E-25    | HLA-DRB5     | -0.809516286 | 0.039855522 |
| USP7       | 0.700571165 | 4.70E-93    | PLXNB2       | -0.809595106 | 6.28E-102   |
| GNPNAT1    | 0.700445487 | 1.39E-69    | AL136295.7   | -0.8098757   | 0.019494884 |
| SKA3       | 0.700383897 | 4.88E-35    | CCNO         | -0.810287351 | 6.60E-12    |
| VDAC2      | 0.700197053 | 9.17E-79    | TECPR1       | -0.811013164 | 2.30E-22    |
| CYB5D1     | 0.699742849 | 1.13E-21    | FBXO27       | -0.811122928 | 0.043920216 |
| RPL7L1     | 0.699688191 | 1.22E-95    | GLP2R        | -0.811392773 | 0.018081809 |
| PFAS       | 0.699517329 | 1.24E-42    | PRSS8        | -0.812345604 | 4.14E-33    |
| SMAD6      | 0.6990434   | 9.34E-06    | OR2A9P       | -0.812360192 | 0.006003401 |
| FAM72D     | 0.698957352 | 5.33E-15    | GUSB         | -0.81247987  | 8.95E-61    |
| CDCA7L     | 0.698744476 | 3.34E-36    | CAPG         | -0.812814795 | 1.19E-43    |
| TEX10      | 0.698686516 | 4.17E-46    | GMDS-DT      | -0.812833183 | 0.037672574 |
| SPATA5     | 0.698228409 | 3.20E-09    | AC023158.1   | -0.812976681 | 1.40E-06    |
| TRMU       | 0.697994722 | 2.73E-30    | MICB         | -0.813000378 | 5.18E-09    |
| AK2        | 0.69754213  | 2.64E-70    | SYDE1        | -0.814057145 | 1.52E-16    |
| DNAJC11    | 0.696537446 | 9.84E-46    | KCND3        | -0.814390736 | 0.017239888 |
| RPF1       | 0.696388328 | 2.97E-19    | TCIRG1       | -0.814614627 | 1.29E-10    |
| ACTR3B     | 0.696341123 | 2.14E-21    | REEP2        | -0.81471001  | 0.000907678 |
| ATP13A3    | 0.696066622 | 1.03E-88    | NUDT18       | -0.814867647 | 9.95E-07    |
| STX2       | 0.695924496 | 2.91E-13    | AC098934.1   | -0.815235871 | 2.47E-05    |
| TDG        | 0.695919477 | 2.83E-52    | EPHA1        | -0.815833194 | 1.83E-29    |
| ELOF1      | 0.69525384  | 2.01E-47    | RSPH1        | -0.815964634 | 3.12E-06    |
| GPN3       | 0.695183104 | 2.25E-16    | LINC01719    | -0.816482463 | 0.000700692 |
| PRPF4      | 0.694562563 | 9.63E-47    | FLNA         | -0.816579083 | 3.29E-113   |
| FUT10      | 0.694443795 | 6.04E-06    | PRRT1B       | -0.81693775  | 0.006260891 |
| MTREX      | 0.694270959 | 4.21E-71    | TRIM45       | -0.817428573 | 2.49E-18    |
| PSMD14     | 0.693401427 | 1.79E-57    | PLXNA3       | -0.817704355 | 6.88E-36    |
| C1orf52    | 0.69334398  | 1.37E-15    | BICDL2       | -0.818433735 | 5.07E-25    |
| EIF4E      | 0.692940154 | 1.70E-64    | LHX2         | -0.818541269 | 1.90E-05    |
| MIEF1      | 0.692643084 | 1.28E-32    | TMEM53       | -0.818933116 | 0.000146479 |
| AP000944.5 | 0.692447077 | 5.64E-08    | KIF13B       | -0.819023986 | 1.62E-16    |
| CDIP1      | 0.69094957  | 0.044248896 | AMZ1         | -0.819280426 | 1.88E-11    |
| QTRT2      | 0.690661389 | 1.56E-41    | TMEM175      | -0.82004884  | 5.39E-12    |

|            |             |             |                    |              |             |
|------------|-------------|-------------|--------------------|--------------|-------------|
| UTP18      | 0.69018648  | 3.38E-37    | PTK6               | -0.820676276 | 7.59E-18    |
| ALKBH8     | 0.690178274 | 1.05E-11    | IDI2-AS1           | -0.821261503 | 0.004446749 |
| GPATCH4    | 0.689963806 | 2.93E-44    | TMPRSS13           | -0.821497255 | 2.69E-17    |
| MRPL32     | 0.689941891 | 1.91E-29    | ZNF747             | -0.821837831 | 1.12E-08    |
| AC022384.1 | 0.688943368 | 0.00101599  | TNRC6C-AS1         | -0.821936634 | 0.000166316 |
| SRPRB      | 0.68828594  | 2.80E-65    | SEPTIN10           | -0.823147985 | 4.51E-13    |
| KIAA1958   | 0.688031766 | 1.42E-13    | MAP3K12            | -0.823177032 | 1.16E-14    |
| LAPTM4B    | 0.687591747 | 1.83E-91    | SNN                | -0.82345253  | 9.63E-17    |
| ZNF354A    | 0.687075221 | 7.40E-25    | SARDH              | -0.824228891 | 0.034702105 |
| ZCCHC7     | 0.686132695 | 1.64E-14    | OGDHL              | -0.824493413 | 0.018719737 |
| POM121     | 0.686001565 | 7.16E-57    | GTF2IRD2B          | -0.824547073 | 1.91E-18    |
| POLR3D     | 0.685885764 | 4.80E-25    | CRACR2B            | -0.824764952 | 7.81E-13    |
| TOMM22     | 0.685753185 | 1.99E-36    | SH3D21             | -0.824915444 | 4.99E-16    |
| PDCD5      | 0.685668293 | 7.54E-35    | FADS3              | -0.824994754 | 9.24E-21    |
|            |             |             | ARHGAP27P1-BPTFP1- |              |             |
| RIF1       | 0.685284251 | 5.46E-53    | KPNA2P3            | -0.825051039 | 2.29E-08    |
| NPL        | 0.685222339 | 0.035730096 | BCL6               | -0.825097392 | 1.54E-15    |
| ZYG11A     | 0.685206823 | 7.66E-10    | AL356056.2         | -0.825586306 | 1.29E-06    |
| NOL7       | 0.684613593 | 2.69E-51    | SDC4               | -0.826000337 | 1.16E-105   |
| NOL9       | 0.683965722 | 1.75E-22    | OAS3               | -0.826199551 | 7.32E-31    |
| CHRNA5     | 0.683492652 | 1.93E-26    | FAM43A             | -0.826979636 | 4.25E-05    |
| ZFAND4     | 0.68277499  | 0.041522091 | CD24               | -0.827432068 | 2.39E-143   |
| TRMT6      | 0.682661618 | 4.03E-17    | FIBCD1             | -0.827849698 | 1.32E-40    |
| DUS4L      | 0.682555795 | 4.12E-15    | PLEKHA6            | -0.827855643 | 1.27E-22    |
| ANKRD16    | 0.681954872 | 5.10E-10    | SEMA4F             | -0.827960183 | 3.21E-09    |
| PRDM6      | 0.681738417 | 0.002756273 | WDR31              | -0.828133789 | 0.000245334 |
| ATP6V1C2   | 0.681591103 | 0.010015623 | CITED2             | -0.828740968 | 7.75E-53    |
| POLR3E     | 0.681310218 | 7.07E-39    | GPRASP2            | -0.829013754 | 1.42E-06    |
| TRMT5      | 0.681230142 | 6.33E-25    | B3GNT3             | -0.829120924 | 1.30E-32    |
| MRPL21     | 0.680967496 | 3.54E-28    | S100A10            | -0.829250649 | 2.70E-121   |
| EIF5B      | 0.680582323 | 9.53E-68    | QPCT               | -0.830110706 | 0.00042374  |
| PLCD4      | 0.679329784 | 0.00334183  | DMC1               | -0.830532417 | 0.017208009 |
| KDM2B      | 0.678659872 | 1.73E-41    | PLEKHB1            | -0.830712226 | 2.50E-07    |
| CCNB1IP1   | 0.678611384 | 7.68E-19    | TENT5A             | -0.831401478 | 1.24E-35    |
| MRM1       | 0.678216583 | 2.30E-08    | HLA-F              | -0.831992442 | 1.53E-05    |
| SLC30A1    | 0.678047903 | 1.13E-31    | SMOC1              | -0.832160029 | 0.007629378 |
| PRPF39     | 0.677481692 | 3.54E-39    | CUL9               | -0.832204003 | 1.01E-26    |
| BMP7       | 0.677398419 | 1.69E-56    | CCDC159            | -0.832431386 | 2.25E-05    |
| MCRIP2     | 0.677190173 | 7.26E-24    | AL132800.1         | -0.833202434 | 0.022618851 |
| METTL16    | 0.677166026 | 3.43E-39    | SLC12A5            | -0.833837263 | 5.68E-07    |
| UMPS       | 0.676517161 | 2.21E-48    | RBMS2              | -0.833944826 | 7.18E-08    |
| OSGIN2     | 0.676111602 | 3.62E-37    | MIR1915HG          | -0.834098039 | 2.66E-09    |
| MGST1      | 0.67518167  | 4.31E-24    | C4orf33            | -0.834580288 | 0.000932219 |
| RIOK2      | 0.674993025 | 1.42E-28    | TCAF2              | -0.835321951 | 0.003566457 |
| RCHY1      | 0.674930959 | 1.83E-18    | TMEM125            | -0.835958571 | 8.63E-11    |
| MICAL2     | 0.674878076 | 9.83E-08    | MMP24OS            | -0.836044348 | 1.59E-26    |

|            |             |             |            |              |             |
|------------|-------------|-------------|------------|--------------|-------------|
| AC012360.3 | 0.674746683 | 7.71E-05    | CRYBG3     | -0.836172    | 5.10E-05    |
| TIMM23     | 0.674666692 | 5.64E-41    | TK2        | -0.836701855 | 4.17E-07    |
| LRRC61     | 0.67442726  | 1.07E-14    | CLGN       | -0.836882851 | 0.012117759 |
| SLC9A3     | 0.67438408  | 3.25E-08    | CCDC170    | -0.837044155 | 1.53E-19    |
| MTERF3     | 0.674201094 | 1.76E-16    | ATP1B1     | -0.838172495 | 3.55E-62    |
| BAZ1A      | 0.67340969  | 2.82E-66    | PLCH2      | -0.838627197 | 0.015847327 |
| MTFR1      | 0.673141697 | 2.89E-43    | CFAP53     | -0.838863697 | 0.033856505 |
| TACO1      | 0.672947943 | 8.79E-33    | SPINK5     | -0.839246685 | 0.018481603 |
| RNA5-8SN1  | 0.672318293 | 0.013730039 | FMN1       | -0.839357469 | 2.34E-10    |
| EMG1       | 0.671953201 | 2.16E-35    | AC068580.4 | -0.839567792 | 2.91E-07    |
| CHD1       | 0.671752113 | 5.04E-46    | EPOR       | -0.839904613 | 9.57E-06    |
| MPHOSPH6   | 0.670764789 | 2.00E-21    | IL17RC     | -0.840011473 | 3.93E-19    |
| HMOX2      | 0.670634593 | 4.01E-50    | OPLAH      | -0.840231164 | 5.19E-06    |
| CA5BP1     | 0.670000977 | 2.44E-05    | ARSG       | -0.840397527 | 1.51E-09    |
| FP565260.1 | 0.669908887 | 1.30E-28    | AC067930.8 | -0.84183557  | 0.002036732 |
| LYPLA1     | 0.669735575 | 5.51E-46    | KCND1      | -0.84196927  | 0.005023782 |
| UBE2O      | 0.669573012 | 2.20E-33    | ATP2A1     | -0.842283579 | 0.026638037 |
| ZNF584     | 0.668465297 | 3.37E-09    | ALKBH7     | -0.842317935 | 7.51E-16    |
| RPP38      | 0.667736149 | 6.66E-16    | TEN1-CDK3  | -0.842326352 | 0.016483883 |
| DOHH       | 0.667323508 | 2.61E-16    | VIPR1      | -0.842344147 | 2.93E-07    |
| DDIAS      | 0.667102795 | 2.35E-22    | AC004233.2 | -0.842646572 | 4.00E-12    |
| TMEM38B    | 0.666991048 | 1.56E-28    | DSC2       | -0.843093099 | 2.04E-31    |
| LIAS       | 0.666656019 | 2.93E-06    | RAB32      | -0.843276831 | 3.51E-17    |
| GRSF1      | 0.666633849 | 1.29E-74    | RABAC1     | -0.843320491 | 4.24E-29    |
| ZBED9      | 0.665755242 | 0.000475958 | HIVEP3     | -0.843427466 | 2.08E-05    |
| UTP11      | 0.665417329 | 3.19E-21    | LYPD6      | -0.844531717 | 4.52E-18    |
| KAT2A      | 0.665097597 | 8.45E-36    | GPR37L1    | -0.844693541 | 4.80E-08    |
| KLHL8      | 0.664505013 | 3.44E-33    | AL732372.2 | -0.844765492 | 0.007860666 |
| DOC2A      | 0.664345369 | 5.25E-08    | SP6        | -0.844864777 | 0.008238179 |
| NOTCH2     | 0.664151861 | 2.17E-52    | SDSL       | -0.846105505 | 7.96E-30    |
| SPAST      | 0.664067327 | 9.08E-19    | ITGA3      | -0.846240821 | 3.97E-104   |
| STK32C     | 0.663897781 | 4.73E-14    | IRF5       | -0.846295313 | 1.85E-09    |
| SRRD       | 0.663743625 | 2.14E-17    | SLCO3A1    | -0.846435322 | 3.13E-07    |
| COQ10A     | 0.663205189 | 2.30E-06    | LINC01963  | -0.846574415 | 5.48E-06    |
| EIF3B      | 0.663168182 | 6.37E-89    | SEMA3F     | -0.846693942 | 2.12E-16    |
| TRAF3      | 0.662124899 | 1.73E-49    | APOD       | -0.846930203 | 4.74E-07    |
| SGTA       | 0.662065093 | 9.47E-40    | KREMEN1    | -0.847106824 | 4.50E-12    |
| OIP5       | 0.661819522 | 1.15E-07    | AL118558.3 | -0.847596057 | 0.004113998 |
| NUP188     | 0.661572451 | 9.10E-64    | BAIAP2-DT  | -0.847879432 | 4.51E-12    |
| GCSH       | 0.661502231 | 9.23E-59    | ZNF112     | -0.847964824 | 0.013103547 |
| CHUK       | 0.661270494 | 5.64E-36    | ZNF862     | -0.848688304 | 4.73E-16    |
| NETO2      | 0.660672888 | 5.91E-30    | SPATA20    | -0.84917444  | 7.49E-53    |
| ZNF586     | 0.660479232 | 0.022991239 | ADGRG6     | -0.849296176 | 1.41E-119   |
| ZBTB44     | 0.660315944 | 1.60E-23    | AL441992.2 | -0.849750029 | 0.003242605 |
| PAX9       | 0.660260357 | 3.83E-11    | NLGN2      | -0.849776321 | 8.46E-32    |
| SLC19A2    | 0.660122744 | 1.62E-15    | DOCK8      | -0.850276124 | 6.29E-15    |
| RABGGTB    | 0.659703647 | 2.43E-29    | H19        | -0.850460945 | 2.87E-06    |

|              |             |             |            |              |             |
|--------------|-------------|-------------|------------|--------------|-------------|
| DCAF13       | 0.658570966 | 1.65E-40    | SNX29      | -0.850496966 | 2.79E-16    |
| HMGXB3       | 0.658356233 | 2.37E-42    | AL133216.2 | -0.850723637 | 0.001417352 |
| RRS1         | 0.658211188 | 8.00E-35    | BAMBI      | -0.851309498 | 1.68E-68    |
| DPH5         | 0.658082578 | 1.63E-12    | TMPRSS2    | -0.851333814 | 2.30E-33    |
| WDR36        | 0.657898622 | 3.53E-37    | CCDC171    | -0.852111536 | 0.021775451 |
| HOMER2       | 0.657545136 | 7.13E-27    | KLF2       | -0.852378442 | 0.010490971 |
| CEP85        | 0.65744828  | 2.82E-14    | GGT6       | -0.852505412 | 0.000330474 |
| C9orf78      | 0.657396807 | 1.30E-50    | RIMBP3     | -0.852753883 | 0.02840143  |
| ZNF593       | 0.657199392 | 9.43E-15    | KIFAP3     | -0.853121258 | 1.99E-07    |
| CCDC66       | 0.656991335 | 1.48E-09    | PACSIN1    | -0.853486785 | 3.36E-14    |
| SNRPD1       | 0.656274209 | 2.11E-37    | BCAR3      | -0.853810769 | 4.71E-16    |
| YBX1         | 0.655586172 | 2.23E-87    | LYN        | -0.85411946  | 0.001830772 |
| TFRC         | 0.655565233 | 2.87E-122   | EXT1       | -0.854392511 | 1.26E-12    |
| CCT8         | 0.655356079 | 1.48E-61    | MDK        | -0.854793978 | 2.23E-48    |
| EIF3M        | 0.65507588  | 2.50E-47    | TSPAN9     | -0.854939903 | 1.57E-16    |
| GRWD1        | 0.654625486 | 2.85E-39    | CD2BP2-DT  | -0.855816246 | 0.013329451 |
| SERTAD2      | 0.654615025 | 4.03E-15    | LRP10      | -0.856079099 | 1.21E-90    |
| SDHB         | 0.653835858 | 3.79E-23    | C1orf210   | -0.856327879 | 1.22E-05    |
| MRPL42       | 0.653711263 | 7.78E-36    | SEZ6L2     | -0.857157807 | 8.57E-63    |
| CDK5RAP1     | 0.653696742 | 2.25E-20    | CYTH2      | -0.857176659 | 3.70E-31    |
| CC2D2A       | 0.653177274 | 7.04E-07    | CCDC153    | -0.857270791 | 0.000746032 |
| APIP         | 0.653159763 | 1.62E-15    | GGACT      | -0.857580886 | 0.001104253 |
| B4GALT5      | 0.653115248 | 9.58E-56    | ZNF365     | -0.858335949 | 7.72E-07    |
| BOLA2-SMG1P6 | 0.652697724 | 1.46E-27    | CAMK2N2    | -0.858444507 | 3.78E-08    |
| CGAS         | 0.65257456  | 2.28E-16    | AKAP5      | -0.85892728  | 0.001022648 |
| RXYLT1       | 0.652372704 | 7.34E-32    | PLXDC2     | -0.859119892 | 0.00092653  |
| TRIT1        | 0.652164381 | 1.43E-12    | TP53TG1    | -0.859396955 | 2.91E-10    |
| CNOT7        | 0.651622088 | 1.17E-48    | SLC12A6    | -0.859433034 | 7.28E-11    |
| EXOSC2       | 0.650973861 | 8.15E-27    | PTAFR      | -0.860024739 | 0.000196066 |
| H2BC11       | 0.650723112 | 0.037679114 | CBX7       | -0.860297892 | 2.66E-14    |
| ZCCHC2       | 0.65049356  | 4.32E-14    | RNF215     | -0.860409553 | 4.16E-13    |
| MZT1         | 0.650315182 | 1.69E-20    | DLC1       | -0.861863646 | 2.36E-08    |
| DHX34        | 0.650306707 | 4.05E-22    | ARHGAP29   | -0.862225065 | 6.82E-26    |
| SNHG17       | 0.649850065 | 5.36E-18    | FAM102A    | -0.862947105 | 4.39E-84    |
| MAX          | 0.649817574 | 1.28E-35    | SLC2A12    | -0.86419993  | 0.003557251 |
| AATF         | 0.649692166 | 7.66E-39    | FAM114A1   | -0.864285651 | 4.25E-07    |
| FASTKD5      | 0.649118231 | 1.29E-13    | IDNK       | -0.86476815  | 1.24E-05    |
| EFHD2        | 0.648051563 | 1.08E-27    | MLPH       | -0.864900516 | 1.20E-103   |
| SELENOI      | 0.647699984 | 3.28E-46    | PTK2B      | -0.864915379 | 2.05E-06    |
| EIF2S2       | 0.647686591 | 1.06E-51    | SGMS1-AS1  | -0.865747116 | 0.001695061 |
| CCDC85C      | 0.647588273 | 2.07E-54    | CDKN1A     | -0.865802101 | 6.16E-28    |
| YDJC         | 0.647574819 | 5.30E-29    | BAIAP3     | -0.865883629 | 3.81E-06    |
| TIMM9        | 0.647551892 | 3.18E-17    | NOX5       | -0.866311278 | 0.013640338 |
| NIPA2        | 0.647509734 | 1.31E-46    | URAHP      | -0.866325625 | 0.002963669 |
| STARD7       | 0.64702182  | 8.20E-81    | LRTOMT     | -0.866593662 | 1.15E-07    |
| BZW2         | 0.646723545 | 6.50E-48    | C5         | -0.866715541 | 7.31E-13    |
| DDX49        | 0.646378737 | 2.73E-35    | GGT7       | -0.86694099  | 4.53E-11    |

|            |             |             |             |              |             |
|------------|-------------|-------------|-------------|--------------|-------------|
| GEMIN6     | 0.646327902 | 2.43E-14    | TIMP3       | -0.867085355 | 1.92E-05    |
| GNL2       | 0.64608681  | 1.64E-42    | CARD14      | -0.867148429 | 1.87E-14    |
| NIFK       | 0.64591869  | 2.42E-27    | TMEM254-AS1 | -0.867458752 | 0.000381327 |
| AASDHPPT   | 0.645676976 | 2.02E-23    | AC073508.2  | -0.867669877 | 5.67E-05    |
| ATP5F1B    | 0.645649998 | 4.96E-103   | MAP1B       | -0.867912602 | 0.012102944 |
| TIMM50     | 0.645636309 | 1.42E-32    | COL11A2     | -0.868303562 | 2.76E-07    |
| EIF2S1     | 0.645585925 | 4.13E-60    | OSBPL5      | -0.868338513 | 6.52E-12    |
| NOM1       | 0.645353906 | 1.03E-33    | ARHGAP30    | -0.868913793 | 0.010881484 |
| POLR3A     | 0.644738091 | 4.36E-29    | SUOX        | -0.868937633 | 1.11E-16    |
| MTDH       | 0.643975019 | 6.33E-73    | MAGED1      | -0.869132248 | 2.67E-115   |
| C16orf91   | 0.643358794 | 3.52E-12    | KRT81       | -0.869428121 | 2.10E-147   |
| DDI2       | 0.642937013 | 1.07E-23    | ERMAP       | -0.869864503 | 2.77E-11    |
| THOC5      | 0.642797093 | 2.06E-31    | LPP-AS2     | -0.870093414 | 0.00021265  |
| CEBPG      | 0.642657847 | 2.31E-35    | KRT80       | -0.8701972   | 2.17E-182   |
| ZNRD1      | 0.642321633 | 2.79E-10    | FAM229A     | -0.870219725 | 0.019796528 |
| DNAJC7     | 0.642271072 | 3.07E-29    | GSN         | -0.870380594 | 1.83E-92    |
| MYCBP2     | 0.641909571 | 5.99E-27    | TSPAN31     | -0.870730936 | 4.38E-24    |
| FBXO25     | 0.641794306 | 1.50E-14    | CD59        | -0.871052852 | 1.06E-140   |
| MRPS24     | 0.641777495 | 2.98E-34    | FAM20C      | -0.871238727 | 5.41E-10    |
| PIGW       | 0.641777202 | 5.00E-21    | F2R         | -0.872058989 | 4.68E-06    |
| ZNHIT6     | 0.641726747 | 1.05E-14    | SEMA4B      | -0.872377235 | 2.11E-35    |
| FAM72A     | 0.640776831 | 1.18E-10    | GATA3       | -0.872718977 | 1.40E-115   |
| NEK6       | 0.640589974 | 1.12E-21    | NR4A1       | -0.872836229 | 1.39E-34    |
| SPATA5L1   | 0.64020801  | 2.07E-08    | TSHZ3       | -0.873026007 | 5.67E-05    |
| BCS1L      | 0.640200123 | 1.83E-22    | NINJ2-AS1   | -0.874880633 | 0.003078658 |
| GAR1       | 0.639307356 | 3.91E-06    | FAM110C     | -0.874891656 | 1.67E-35    |
| TRUB1      | 0.639081861 | 3.21E-23    | AC090114.2  | -0.875436114 | 8.72E-17    |
| NDUFC2-    |             |             |             |              |             |
| KCTD14     | 0.638929236 | 0.000652459 | AC093001.1  | -0.875592322 | 4.66E-22    |
| IDH3A      | 0.638716746 | 2.21E-48    | STAC3       | -0.875680995 | 0.00890855  |
| PTCD3      | 0.63796425  | 4.66E-36    | SPSB2       | -0.876009528 | 3.93E-05    |
| PSME4      | 0.6379386   | 1.23E-49    | B4GALT1     | -0.876575392 | 1.74E-122   |
| ATXN7L2    | 0.637371954 | 9.24E-10    | ARNT2       | -0.876656868 | 1.95E-51    |
| MAP3K20    | 0.637286203 | 2.35E-24    | DNMBP       | -0.877149633 | 2.62E-12    |
| TIMM13     | 0.636723456 | 8.44E-23    | PTPRG-AS1   | -0.877596751 | 2.46E-12    |
| GTF3C4     | 0.636520753 | 1.10E-57    | TOX2        | -0.877842702 | 0.000306783 |
| SERBP1     | 0.635681942 | 2.81E-93    | PGM2L1      | -0.878084148 | 1.00E-06    |
| VKORC1L1   | 0.635497353 | 5.39E-48    | PLEKHH2     | -0.878157304 | 8.52E-06    |
| GTF2E2     | 0.635471012 | 4.32E-24    | ZNF517      | -0.879503511 | 2.47E-11    |
| PRKAR2A    | 0.635249489 | 2.22E-40    | AP006222.1  | -0.879599692 | 2.24E-06    |
| MRPS35     | 0.634981622 | 2.68E-31    | CLEC2D      | -0.879694143 | 0.000241444 |
| PLCH1      | 0.634728152 | 1.71E-10    | APLP1       | -0.879740453 | 9.50E-09    |
| SLC7A6     | 0.63470643  | 8.16E-42    | PLK2        | -0.879836374 | 1.26E-78    |
| AC068547.1 | 0.634035722 | 6.36E-08    | MATN2       | -0.880083616 | 7.07E-16    |
| MRPL47     | 0.634023229 | 4.87E-26    | RABL2A      | -0.881184986 | 4.67E-05    |
| PUS3       | 0.633940276 | 0.000198788 | PLD2        | -0.881348357 | 1.60E-18    |
| AP000648.4 | 0.633651175 | 0.037359741 | TTLL7       | -0.881608884 | 0.000581931 |

|            |             |             |            |              |             |
|------------|-------------|-------------|------------|--------------|-------------|
| DDX39A     | 0.633558101 | 2.95E-55    | TCHH       | -0.881991738 | 0.003823464 |
| BMS1       | 0.632982955 | 1.65E-46    | CCDC24     | -0.882132994 | 1.97E-07    |
| NDUFAF1    | 0.63279511  | 4.38E-10    | ZNF493     | -0.882659232 | 0.004960943 |
| AK4        | 0.632643596 | 1.37E-35    | RAB9B      | -0.882699068 | 7.49E-05    |
| ELAC2      | 0.632454647 | 8.70E-45    | ADGRA2     | -0.882791335 | 0.000303524 |
| TUFM       | 0.632357156 | 4.76E-87    | FCHSD1     | -0.88287414  | 3.08E-15    |
| CHKA       | 0.632061857 | 6.50E-20    | ADIRF      | -0.883238262 | 7.71E-32    |
| TWISTNB    | 0.631578221 | 1.31E-20    | FRK        | -0.883765834 | 7.94E-05    |
| CEP85L     | 0.631574006 | 0.000288871 | TBX6       | -0.884593637 | 0.004802935 |
| CSNK2A1    | 0.631050072 | 1.01E-51    | C4orf19    | -0.884967945 | 3.44E-24    |
| COIL       | 0.630869314 | 3.05E-30    | TGM1       | -0.885737511 | 1.16E-10    |
| UTP14A     | 0.630780716 | 5.73E-42    | NECTIN2    | -0.885900493 | 1.09E-69    |
| DYNC2H1    | 0.63068785  | 4.61E-10    | CTSD       | -0.8867854   | 1.66E-27    |
| BIRC5      | 0.63037594  | 4.48E-38    | AP000866.1 | -0.886930202 | 0.020859715 |
| SMS        | 0.630245294 | 1.58E-50    | SMARCD3    | -0.889163186 | 2.81E-14    |
| PSMD12     | 0.629680629 | 4.53E-58    | KCNK15     | -0.889474119 | 1.85E-90    |
| C16orf87   | 0.629565546 | 1.99E-11    | BCAS1      | -0.889799657 | 2.73E-144   |
| PHKA1      | 0.629543893 | 6.31E-28    | RAP2C-AS1  | -0.890685468 | 0.010950333 |
| EMC3-AS1   | 0.629073907 | 2.16E-05    | SQOR       | -0.890952938 | 9.14E-18    |
| NUP155     | 0.628530518 | 5.69E-32    | NDRG1      | -0.891348774 | 2.70E-15    |
| BRMS1      | 0.628262783 | 5.32E-36    | ZNF821     | -0.891978634 | 8.02E-09    |
| MRRF       | 0.628190864 | 8.92E-25    | ADIRF-AS1  | -0.892155248 | 7.60E-06    |
| CNTNAP2    | 0.628024156 | 0.024718716 | OLFM2      | -0.892341758 | 1.70E-07    |
| CLUH       | 0.627755049 | 3.69E-59    | ANKRD34A   | -0.892564707 | 9.22E-05    |
| FP236383.5 | 0.627710123 | 0.006329008 | ADCK5      | -0.893082222 | 2.70E-20    |
| CDK6       | 0.627694795 | 2.69E-19    | HDAC5      | -0.893228427 | 1.30E-07    |
| MRPL14     | 0.627256878 | 3.15E-33    | TNFRSF19   | -0.893666984 | 0.007040721 |
| MRPS9      | 0.627249093 | 4.97E-23    | AL162258.1 | -0.89454449  | 0.001194765 |
| RNASEH1    | 0.627239517 | 1.30E-20    | SEMA4A     | -0.894666225 | 1.57E-11    |
| EXPH5      | 0.6269713   | 0.012835098 | WLS        | -0.894949975 | 1.90E-05    |
| PRKX       | 0.626933947 | 4.65E-22    | ATP6V0A4   | -0.895031992 | 3.23E-12    |
| NUP42      | 0.626734887 | 7.18E-12    | IQSEC2     | -0.895081421 | 1.91E-14    |
| DDX56      | 0.626438153 | 8.55E-51    | PTPRE      | -0.896280407 | 2.41E-14    |
| PDK1       | 0.625840368 | 1.35E-12    | GDPD3      | -0.896372366 | 7.17E-28    |
| SSBP1      | 0.625685132 | 6.59E-38    | PBLD       | -0.896499863 | 9.46E-09    |
| FBL        | 0.625160104 | 5.01E-16    | PDGFRL     | -0.897443189 | 4.24E-11    |
| NAMPTP1    | 0.624824508 | 4.01E-10    | FRG1BP     | -0.898755633 | 1.04E-25    |
| KRTCAP3    | 0.624696153 | 1.52E-05    | PRAF2      | -0.901048959 | 6.21E-20    |
| MPHOSPH10  | 0.624652142 | 3.57E-33    | MICALL2    | -0.901356779 | 1.28E-35    |
| CEBPB      | 0.624146314 | 1.05E-20    | LINC01137  | -0.901404683 | 0.001384218 |
| NKRF       | 0.623023682 | 8.16E-38    | VEGFC      | -0.901422834 | 1.29E-08    |
| MRPL48     | 0.622601354 | 2.11E-15    | RARA       | -0.903259819 | 6.54E-86    |
| NDUFAB1    | 0.622218606 | 1.91E-34    | CUEDC1     | -0.90329119  | 4.33E-51    |
| MRPL16     | 0.622061922 | 5.24E-33    | ACCS       | -0.903462999 | 3.37E-06    |
| MRPL46     | 0.622046799 | 6.74E-16    | TFPI       | -0.903745082 | 5.94E-53    |
| MCMBP      | 0.622037109 | 1.16E-57    | ARHGAP4    | -0.903928011 | 1.58E-08    |
| MTURN      | 0.621999209 | 7.90E-11    | PPOX       | -0.903928027 | 1.63E-09    |

|            |             |             |            |              |             |
|------------|-------------|-------------|------------|--------------|-------------|
| NHEJ1      | 0.621698191 | 1.53E-05    | TMEM229B   | -0.904588185 | 1.96E-22    |
| RPUSD2     | 0.6214978   | 2.97E-08    | ELF3       | -0.904914654 | 3.70E-81    |
| RIDA       | 0.62149086  | 2.98E-15    | SLC2A10    | -0.905655681 | 5.13E-42    |
| FBXO31     | 0.621385482 | 5.78E-25    | AC253536.1 | -0.905676863 | 1.87E-05    |
| FP236383.4 | 0.620721783 | 0.007166999 | ESR1       | -0.905966094 | 1.30E-86    |
| BCCIP      | 0.620347514 | 1.17E-34    | ECHDC2     | -0.906157484 | 3.07E-16    |
| STK17A     | 0.620319405 | 1.30E-11    | AC108134.1 | -0.906271679 | 1.92E-05    |
| ANAPC1     | 0.62023076  | 2.66E-48    | AL049834.1 | -0.906440431 | 1.10E-05    |
| PCSK6      | 0.620170799 | 5.32E-10    | SPAG4      | -0.906746036 | 1.72E-06    |
| TMEM186    | 0.620146859 | 6.64E-17    | DNAH1      | -0.906882964 | 0.004632925 |
| ELOVL6     | 0.619535488 | 9.19E-21    | TOM1L2     | -0.906993245 | 1.67E-72    |
| AC125807.2 | 0.619417645 | 3.72E-06    | BTC        | -0.907839811 | 7.82E-11    |
| GEMIN7     | 0.619258069 | 9.18E-19    | MAGI2      | -0.908552771 | 9.17E-05    |
| DESI2      | 0.619174114 | 8.53E-18    | AC104825.1 | -0.910673494 | 0.012293894 |
| MRPS34     | 0.618811119 | 3.21E-52    | GPR87      | -0.910929021 | 0.004900419 |
| SMN1       | 0.61863713  | 1.18E-30    | DNAJC4     | -0.911435504 | 2.72E-14    |
| MIS18A     | 0.618514301 | 1.28E-24    | PCDHA11    | -0.911641691 | 2.34E-16    |
| HSPA4      | 0.618413653 | 1.14E-61    | NEAT1      | -0.911692336 | 5.31E-05    |
| TMX2       | 0.618245545 | 2.88E-33    | SLC66A3    | -0.911780559 | 1.13E-24    |
| RIPK2      | 0.61819146  | 4.39E-20    | AC096887.2 | -0.91231757  | 0.027775926 |
| POLR3F     | 0.618027926 | 3.83E-17    | LDLRAD4    | -0.91276087  | 4.79E-24    |
| EIF4EBP1   | 0.617699255 | 2.18E-37    | PLA2G4C    | -0.913551083 | 0.003415061 |
| ATL2       | 0.617258775 | 8.11E-24    | SELENOM    | -0.913775068 | 0.000509625 |
| MTFMT      | 0.616741332 | 1.65E-13    | ITGA5      | -0.913784488 | 4.54E-27    |
| NFATC3     | 0.616723448 | 8.63E-31    | KIFC3      | -0.914653374 | 1.67E-22    |
| COLGALT1   | 0.616348487 | 5.20E-44    | FMNL1      | -0.916035951 | 2.07E-08    |
| FEM1A      | 0.615578919 | 1.32E-08    | TTLL3      | -0.916094681 | 9.57E-16    |
| MRPL10     | 0.615512986 | 1.89E-31    | LMNTD2     | -0.916210282 | 0.000414693 |
| CCT2       | 0.615319445 | 6.25E-66    | CTSV       | -0.91624371  | 1.36E-08    |
| C2orf27A_1 | 0.614871254 | 1.53E-05    | SMIM14     | -0.917086821 | 4.69E-60    |
| SPG21      | 0.614862072 | 3.79E-38    | TRGC1      | -0.917454011 | 1.14E-60    |
| PRELID1    | 0.61485453  | 3.15E-63    | DMTN       | -0.917589829 | 8.37E-21    |
| MAP4K5     | 0.614754991 | 1.52E-32    | IL17RE     | -0.918716923 | 4.77E-05    |
| PRKAR1B    | 0.614715574 | 3.94E-38    | PSD        | -0.919203762 | 0.000125393 |
| RPP30      | 0.614591893 | 1.22E-16    | PRX        | -0.919855136 | 1.42E-05    |
| MPLKIP     | 0.614095372 | 1.92E-13    | SYT10      | -0.919896749 | 9.96E-32    |
| SREK1IP1   | 0.614060146 | 4.17E-16    | MYH14      | -0.920061673 | 4.17E-81    |
| TTC4       | 0.613914905 | 2.89E-15    | CBLB       | -0.920181185 | 1.37E-14    |
| TARS3      | 0.613575812 | 7.80E-06    | RALGPS1    | -0.921083697 | 4.21E-13    |
| METTL4     | 0.613554904 | 7.67E-08    | OSCP1      | -0.921339312 | 0.001486064 |
| FP671120.7 | 0.613251518 | 0.008475425 | AL732372.1 | -0.92170391  | 0.000142841 |
| ITGB1BP1   | 0.613223785 | 6.80E-38    | DNAH7      | -0.921762014 | 0.005760674 |
| MAP7D3     | 0.61319251  | 8.35E-24    | PIGZ       | -0.921769539 | 0.000223288 |
| NAA20      | 0.613022085 | 2.40E-50    | GMPR       | -0.921835275 | 0.000475919 |
| COPS2      | 0.612301619 | 3.43E-27    | CRYL1      | -0.922257179 | 2.11E-16    |
| FAM92A     | 0.612297229 | 5.72E-12    | TMEM91     | -0.922518836 | 0.010552074 |
| RAP1GDS1   | 0.612221208 | 6.85E-24    | ST8SIA6    | -0.922562226 | 1.18E-19    |



|            |             |             |            |              |             |
|------------|-------------|-------------|------------|--------------|-------------|
| RAD18      | 0.61129297  | 2.05E-21    | SELL       | -0.922826801 | 0.006660713 |
| GMPS       | 0.611157989 | 6.05E-65    | LINC00857  | -0.923286312 | 0.008476885 |
| NUP88      | 0.610839334 | 1.31E-27    | FA2H       | -0.923425826 | 1.06E-05    |
| FAM207A    | 0.610722239 | 3.79E-21    | CASTOR3    | -0.923440029 | 9.11E-25    |
| ALG5       | 0.610457824 | 3.39E-15    | SERPINB8   | -0.923457899 | 0.000184156 |
| TXNL4B     | 0.610446269 | 1.86E-13    | HLA-DRB1   | -0.924436768 | 8.34E-27    |
| ME1        | 0.609995799 | 1.21E-31    | RHOB       | -0.926018904 | 1.41E-63    |
| NUDT15     | 0.609784138 | 6.18E-18    | PRR15L     | -0.926161972 | 2.55E-24    |
| ENTPD1     | 0.609691198 | 5.23E-12    | PRKD1      | -0.926775579 | 7.56E-06    |
| TARS1      | 0.60963798  | 9.56E-57    | GDPD5      | -0.926918181 | 9.01E-05    |
| FOXN2      | 0.60956982  | 3.01E-14    | FPR3       | -0.927576724 | 0.007031462 |
| UBE2K      | 0.609430818 | 6.66E-47    | PNRC1      | -0.928171947 | 3.82E-33    |
| HAUS6      | 0.609087166 | 1.74E-25    | CEMIP2     | -0.928543052 | 1.20E-61    |
| ZFAND1     | 0.60891811  | 2.47E-27    | YPEL3      | -0.929102701 | 4.33E-54    |
| NSUN5      | 0.60879733  | 1.22E-34    | DOCK8-AS1  | -0.929441583 | 0.000173543 |
| CBX2       | 0.608512447 | 1.65E-17    | ANO8       | -0.92979009  | 1.97E-12    |
| REL        | 0.608018254 | 1.87E-10    | CLDN1      | -0.930081293 | 1.63E-45    |
| C3orf52    | 0.607933021 | 0.002968407 | LDHD       | -0.932168341 | 0.000177852 |
| RPL22L1    | 0.607923556 | 7.78E-25    | MIR9-3HG   | -0.932707329 | 2.85E-07    |
| SMIM13     | 0.607687038 | 1.06E-15    | FBP1       | -0.932734646 | 4.21E-74    |
| LMO4       | 0.60752519  | 4.68E-10    | KIAA1211L  | -0.932766191 | 1.40E-27    |
| DYNC1LI1   | 0.607461474 | 7.09E-20    | CD109      | -0.932819729 | 8.64E-18    |
| CFAP298    | 0.606840972 | 1.61E-32    | CREBRF     | -0.933043528 | 2.35E-11    |
| AC097448.1 | 0.606349506 | 3.97E-05    | UPK2       | -0.933097915 | 1.76E-42    |
| ABT1       | 0.606309656 | 2.16E-23    | ACSS2      | -0.933223728 | 9.51E-25    |
| MALSU1     | 0.606100166 | 5.24E-13    | ARNTL      | -0.933245644 | 3.00E-12    |
| LONP1      | 0.605990614 | 1.41E-43    | PALLD      | -0.933251583 | 4.82E-36    |
| KANSL2     | 0.60558181  | 3.29E-15    | TNFAIP8    | -0.933388055 | 2.68E-22    |
| PIM2       | 0.605565095 | 3.65E-07    | LTC4S      | -0.933536308 | 0.020366811 |
| CCNJ       | 0.605120124 | 9.89E-15    | AL359258.2 | -0.934406633 | 0.001521589 |
| PHB2       | 0.60481711  | 3.07E-43    | BCL3       | -0.934412912 | 1.84E-18    |
| UBE2V2     | 0.604802474 | 3.21E-37    | EVA1B      | -0.934451856 | 1.76E-07    |
| LSG1       | 0.604775367 | 6.75E-43    | KRT7       | -0.93455597  | 4.33E-44    |
| MCPH1      | 0.604466312 | 3.44E-11    | GCOM1      | -0.935039329 | 1.80E-07    |
| SET        | 0.604284394 | 4.77E-88    | FAM161B    | -0.936375375 | 1.25E-08    |
| RAN        | 0.603616071 | 6.12E-73    | MYZAP      | -0.936446348 | 9.09E-11    |
| AL358472.6 | 0.603545078 | 7.71E-08    | WDR66      | -0.937212901 | 0.000356055 |
| APTX       | 0.603437274 | 4.54E-14    | TRIM2      | -0.937314899 | 0.000136732 |
| LINC00662  | 0.603335807 | 5.84E-05    | ALDH3B1    | -0.937389985 | 1.99E-11    |
| FRAT2      | 0.603039923 | 7.41E-18    | ZNF117     | -0.937439519 | 4.47E-18    |
| HSPBAP1    | 0.60297429  | 0.00083735  | ITGA6      | -0.938009886 | 9.54E-12    |
| PPP1CC     | 0.602771419 | 2.46E-58    | ERV3-1     | -0.938762521 | 5.08E-16    |
| PITPNC1    | 0.602716383 | 2.43E-23    | PRRT3      | -0.939339239 | 5.26E-41    |
| MTX2       | 0.602629753 | 3.92E-18    | LAMA3      | -0.94158743  | 0.00313427  |
| PSME3      | 0.602577186 | 1.14E-52    | DGCR9      | -0.941723449 | 0.019663046 |
| LSM11      | 0.602295786 | 9.41E-10    | TRIOBP     | -0.941938203 | 1.87E-40    |
| ZNF674-AS1 | 0.602280712 | 0.000130086 | FAM153CP   | -0.942016579 | 2.47E-05    |

|              |             |             |            |              |             |
|--------------|-------------|-------------|------------|--------------|-------------|
| MYO10        | 0.602142606 | 5.84E-16    | VASH1      | -0.942918834 | 1.76E-14    |
| ARIH2        | 0.601200536 | 3.33E-36    | RHBDF1     | -0.943351277 | 1.08E-57    |
| RHBDF2       | 0.600896502 | 2.52E-19    | NBEA       | -0.944705028 | 1.07E-17    |
| FAIM         | 0.600766848 | 3.39E-10    | LXN        | -0.94558303  | 2.04E-103   |
| GEMIN2       | 0.60035202  | 1.33E-13    | PADI2      | -0.946166355 | 0.001845077 |
| SNHG16       | 0.600285856 | 1.33E-29    | DGCR6      | -0.946405328 | 0.000379847 |
| FP671120.4   | 0.60019633  | 0.024650089 | SHFL       | -0.947260392 | 2.12E-12    |
| NCBP2AS2     | 0.600172187 | 1.91E-28    | AC132812.1 | -0.947517271 | 0.001076865 |
| FGFR1OP      | 0.599625104 | 4.86E-16    | SALL2      | -0.947768824 | 0.01321344  |
| CEP83        | 0.599587871 | 2.01E-13    | NECAB1     | -0.948517563 | 9.37E-10    |
| STX18-AS1    | 0.598725105 | 0.041996295 | CES3       | -0.949049503 | 0.0026265   |
| NCLN         | 0.598470877 | 7.45E-46    | BTG1       | -0.949100679 | 1.63E-63    |
| CEBPD        | 0.597256159 | 9.52E-06    | TP53INP2   | -0.949388379 | 1.56E-33    |
| CCNA2        | 0.596923604 | 3.80E-44    | LINC01257  | -0.950381317 | 0.028630836 |
| DDHD1        | 0.595932655 | 2.90E-21    | SSH3       | -0.950955422 | 6.76E-78    |
| KPNA4        | 0.595591199 | 1.86E-50    | UNC5A      | -0.951191357 | 0.005151264 |
| EDRF1        | 0.595304451 | 4.08E-17    | TMOD1      | -0.952930983 | 0.00012292  |
| CUL1         | 0.595159003 | 2.83E-49    | CAPN5      | -0.953242306 | 8.08E-33    |
| PARL         | 0.594980844 | 2.26E-28    | MIR210HG   | -0.953600479 | 2.64E-05    |
| PPIH         | 0.594781077 | 3.83E-12    | HSH2D      | -0.954188139 | 8.44E-19    |
| ZNF589       | 0.594383738 | 5.47E-06    | NAP1L2     | -0.955457695 | 0.000707975 |
| AC012615.1   | 0.593770075 | 0.002066648 | GLDN       | -0.955728349 | 1.77E-05    |
| ATP1B3       | 0.593158661 | 6.42E-37    | DENND3     | -0.956481175 | 9.83E-13    |
| EFNA3        | 0.593015954 | 1.14E-05    | AC092295.2 | -0.957281178 | 0.022763148 |
| TBC1D30      | 0.593004722 | 2.43E-45    | NEK8       | -0.957470652 | 2.35E-08    |
| ZNF695       | 0.592977646 | 0.000929548 | AC018665.1 | -0.957899752 | 0.001145826 |
| ADSS2        | 0.592740618 | 4.09E-25    | CASTOR1    | -0.957978386 | 0.000393498 |
| FARSB        | 0.592554167 | 2.57E-42    | APAF1      | -0.958550004 | 2.34E-11    |
| DLX1         | 0.592325028 | 1.64E-06    | MC1R       | -0.958945622 | 2.97E-24    |
| DDX28        | 0.592321885 | 2.46E-14    | PALM       | -0.960137004 | 4.20E-33    |
| RFC3         | 0.592203075 | 2.87E-32    | AC084018.2 | -0.96019457  | 0.00740213  |
| GID4         | 0.592042129 | 1.37E-07    | ELF3-AS1   | -0.961053822 | 7.25E-07    |
| FAM86B1      | 0.591793603 | 3.25E-06    | MAGED2     | -0.961710837 | 5.40E-76    |
| CLPX         | 0.591773881 | 1.24E-29    | CAV1       | -0.963307068 | 7.36E-71    |
| PELP1        | 0.591597496 | 1.64E-49    | EPHA2      | -0.964568028 | 7.77E-56    |
| CENPP        | 0.591443722 | 3.25E-09    | COL18A1    | -0.964572518 | 1.57E-36    |
| PTGES3       | 0.59131953  | 3.41E-51    | FXYD3      | -0.965473885 | 6.00E-63    |
| RWDD1        | 0.591301449 | 6.19E-22    | SFXN5      | -0.966389125 | 3.87E-17    |
| DIS3L        | 0.591170774 | 5.10E-13    | TLE4       | -0.966907938 | 0.003409299 |
| MAPKAPK5-AS1 | 0.590045592 | 3.12E-11    | GOLGA7B    | -0.967008945 | 1.06E-05    |
| WDCP         | 0.589828161 | 8.93E-08    | LINC00461  | -0.968136977 | 0.006499806 |
| SDHD         | 0.589756876 | 1.78E-24    | SLC22A17   | -0.968218125 | 6.38E-07    |
| EFTUD2       | 0.589343656 | 1.97E-43    | PHF1       | -0.968263764 | 9.44E-27    |
| HDAC2        | 0.589071421 | 1.70E-44    | DCDC2      | -0.969226031 | 1.83E-88    |
| STRAP        | 0.588562393 | 1.75E-50    | AP003498.1 | -0.969228805 | 0.000936136 |
| DNTTIP2      | 0.588240254 | 2.00E-29    | PCDH1      | -0.971336488 | 2.05E-32    |
| EIF3E        | 0.587645401 | 5.85E-69    | MIEF2      | -0.971514936 | 5.93E-20    |

|          |             |             |            |              |             |
|----------|-------------|-------------|------------|--------------|-------------|
| TBCE_2   | 0.587566766 | 2.58E-05    | AGR2       | -0.974906032 | 1.44E-58    |
| SF3A3    | 0.587388626 | 1.73E-31    | AC138028.6 | -0.974920172 | 0.001052048 |
| SRM      | 0.587295703 | 3.93E-54    | CCT6B      | -0.975120139 | 0.001417898 |
| ATAD1    | 0.586880447 | 1.90E-27    | MYOF       | -0.975460976 | 2.08E-182   |
| MAPK6    | 0.586838185 | 3.40E-62    | HRH2       | -0.975969012 | 0.01054778  |
| SPESP1   | 0.586523974 | 0.008114329 | NPC2       | -0.976122017 | 1.56E-39    |
| RAE1     | 0.586467095 | 1.53E-43    | AL358852.1 | -0.976272116 | 0.015275186 |
| C1orf131 | 0.586237915 | 3.08E-09    | KRT18      | -0.976305882 | 1.48E-209   |
| FCHO1    | 0.586179067 | 5.78E-16    | ULBP2      | -0.976526601 | 1.14E-16    |
| USP10    | 0.585700343 | 2.92E-53    | NRP1       | -0.976761579 | 8.42E-147   |
| R3HDM1   | 0.585415979 | 3.99E-30    | TYMP       | -0.977364094 | 0.00152586  |
|          |             |             | FAM66C     | -0.979697684 | 0.000657035 |
|          |             |             | MAGED4     | -0.979873415 | 0.000620581 |
|          |             |             | EHBP1L1    | -0.980922997 | 1.07E-18    |
|          |             |             | TMBIM1     | -0.982435304 | 0.000109918 |
|          |             |             | TIMP2      | -0.983207767 | 2.97E-32    |
|          |             |             | ANXA3      | -0.983261054 | 5.09E-48    |
|          |             |             | CLCN4      | -0.983789212 | 0.000768469 |
|          |             |             | F8A3       | -0.984009194 | 0.01181847  |
|          |             |             | MAPK11     | -0.984051448 | 1.41E-20    |
|          |             |             | MYO7A      | -0.985274311 | 0.007032051 |
|          |             |             | ALOX15     | -0.986058159 | 9.07E-12    |
|          |             |             | PALM2AKAP2 | -0.986062468 | 8.90E-05    |
|          |             |             | IDUA       | -0.986490353 | 1.68E-10    |
|          |             |             | TAPBPL     | -0.986647865 | 4.17E-08    |
|          |             |             | ACER2      | -0.986706813 | 0.000522451 |
|          |             |             | AMTN       | -0.987276919 | 0.000302677 |
|          |             |             | SDCBP2     | -0.987286384 | 2.16E-05    |
|          |             |             | GABRP      | -0.987608948 | 2.40E-09    |
|          |             |             | CCDC191    | -0.987674333 | 1.34E-06    |
|          |             |             | LRRC75A    | -0.987901751 | 1.03E-05    |
|          |             |             | FO681492.1 | -0.988906401 | 0.000792666 |
|          |             |             | ZNF792     | -0.988959944 | 0.000415845 |
|          |             |             | KIAA1217   | -0.989539349 | 4.76E-16    |
|          |             |             | SPACA6     | -0.989614531 | 0.00070475  |
|          |             |             | PAQR6      | -0.991778744 | 2.79E-09    |
|          |             |             | AC018521.5 | -0.991800764 | 0.014006021 |
|          |             |             | SYNE1      | -0.99201731  | 0.000340449 |
|          |             |             | C2CD4C     | -0.992465733 | 3.95E-05    |
|          |             |             | TNS3       | -0.993895385 | 9.31E-85    |
|          |             |             | TENT5C     | -0.995806695 | 6.52E-12    |
|          |             |             | SDC2       | -0.997274155 | 7.57E-17    |
|          |             |             | GPR39      | -0.997677016 | 0.002145192 |
|          |             |             | MCF2L      | -0.998183234 | 1.42E-13    |
|          |             |             | PMEL       | -0.998342811 | 0.000467453 |
|          |             |             | CACNG4     | -0.998435195 | 2.43E-53    |
|          |             |             | RECK       | -0.998747395 | 0.000168498 |

|             |              |             |
|-------------|--------------|-------------|
| OBSL1       | -0.999050722 | 1.06E-73    |
| H4C8        | -0.999137026 | 2.01E-08    |
| H6PD        | -0.999516143 | 1.44E-23    |
| CFAP206     | -0.999648591 | 0.001772257 |
| NRSN2       | -0.999991504 | 4.80E-06    |
| IGDCC3      | -1.000465092 | 0.000110101 |
| ZNF462      | -1.000660624 | 8.02E-18    |
| AGAP11      | -1.001311034 | 0.000284529 |
| PALM3       | -1.001337651 | 3.90E-10    |
| SLIT2       | -1.001481179 | 0.000315772 |
| AC016682.1  | -1.001707371 | 0.00434127  |
| EMID1       | -1.003467922 | 2.32E-09    |
| FMO5        | -1.003683264 | 0.000328136 |
| LMCD1       | -1.004081518 | 6.70E-25    |
| STRIP2      | -1.004428729 | 0.000751658 |
| LINC01135   | -1.004584139 | 0.004617675 |
| TJP3        | -1.005366709 | 9.92E-29    |
| SERPINA11   | -1.005620163 | 0.002423333 |
| LRRC24      | -1.007177034 | 4.89E-08    |
| KLC3        | -1.007562733 | 3.12E-05    |
| GPR132      | -1.007600646 | 0.002007152 |
| AC126564.1  | -1.007780452 | 3.74E-13    |
| IL1R1       | -1.008324028 | 5.51E-28    |
| PPP1R18     | -1.008644249 | 1.09E-39    |
| CLIP2       | -1.009109285 | 1.84E-06    |
| AL158211.5  | -1.010225167 | 0.001976678 |
| CAPS        | -1.010403685 | 0.001936425 |
| H3C15       | -1.010531863 | 0.000740516 |
| SLC12A5-AS1 | -1.010697517 | 0.003649791 |
| PARP10      | -1.011949751 | 8.08E-39    |
| FZD2        | -1.012108918 | 9.95E-17    |
| DHRS12      | -1.012580599 | 0.0005655   |
| PCDH9       | -1.013063779 | 2.71E-09    |
| FAM122C     | -1.01346941  | 1.35E-08    |
| MCC         | -1.013769509 | 2.08E-07    |
| KRT8        | -1.014126736 | 2.55E-219   |
| SCART1      | -1.014754267 | 5.50E-05    |
| SLC28A1     | -1.01543959  | 0.001476806 |
| TMEM86A     | -1.016096329 | 3.71E-05    |
| SEMA7A      | -1.01652304  | 6.80E-09    |
| SBK1        | -1.018031125 | 6.29E-12    |
| IQCJ-SCHIP1 | -1.018249515 | 9.32E-08    |
| C8orf58     | -1.018682031 | 2.54E-15    |
| S100A1      | -1.018687374 | 1.34E-06    |
| AC046134.2  | -1.019598195 | 0.0004366   |
| CISH        | -1.019862799 | 2.37E-16    |
| GPX3        | -1.020386959 | 1.69E-15    |

|            |              |             |
|------------|--------------|-------------|
| SNTB1      | -1.021441479 | 3.62E-06    |
| MEIS3P1    | -1.022848279 | 0.00040941  |
| EVI5L      | -1.024275072 | 1.95E-40    |
| HDAC6      | -1.02437651  | 5.50E-31    |
| KIAA0513   | -1.025440596 | 8.29E-47    |
| CPQ        | -1.025512321 | 0.00679824  |
| EHD2       | -1.027237321 | 6.20E-14    |
| PLEKHG2    | -1.027538512 | 2.40E-33    |
| ANOS1      | -1.02790604  | 0.000125013 |
| LAMB2      | -1.027934594 | 5.40E-95    |
| BCAM       | -1.028428523 | 5.97E-22    |
| MOSPD3     | -1.028824231 | 3.38E-25    |
| KRT7-AS    | -1.029096261 | 0.000193949 |
| IGFBP5     | -1.030151758 | 3.80E-83    |
| EPAS1      | -1.03026496  | 2.58E-105   |
| LY6G5C     | -1.030294862 | 0.00231595  |
| FRAS1      | -1.030403397 | 6.69E-05    |
| SMAD3      | -1.03104264  | 4.53E-138   |
| APOBEC3B   | -1.03170309  | 9.84E-09    |
| ARSA       | -1.031715271 | 8.67E-21    |
| THBS3      | -1.031806726 | 6.75E-20    |
| IFI27L2    | -1.032261873 | 5.30E-14    |
| ANXA6      | -1.033105342 | 2.14E-57    |
| KIAA1324   | -1.034481961 | 2.42E-72    |
| AP001816.1 | -1.034880487 | 2.07E-10    |
| AL162458.1 | -1.03540131  | 4.19E-11    |
| TIGD3      | -1.036552134 | 0.001271138 |
| TTYH3      | -1.036668307 | 4.24E-44    |
| IGFBP4     | -1.0370309   | 5.23E-46    |
| MUC3A      | -1.03724001  | 4.20E-20    |
| TCEAL3     | -1.037687884 | 3.66E-45    |
| PLAAT3     | -1.037694074 | 1.95E-18    |
| EGFR       | -1.038163928 | 1.03E-14    |
| CBR3-AS1   | -1.038169341 | 5.95E-12    |
| TNFAIP8L1  | -1.038797918 | 8.57E-09    |
| VTCN1      | -1.039410017 | 6.74E-09    |
| ZNF211     | -1.040169104 | 8.53E-06    |
| SLC22A18   | -1.040281574 | 2.27E-14    |
| KCTD11     | -1.040851893 | 2.03E-26    |
| UNC13D     | -1.041327326 | 4.00E-105   |
| LRP1       | -1.042191133 | 6.54E-09    |
| FGD1       | -1.043704321 | 0.001166699 |
| ABCD1      | -1.043911209 | 3.31E-07    |
| AGRN       | -1.044120539 | 1.32E-42    |
| H2BC21     | -1.044291076 | 1.34E-38    |
| ZNF467     | -1.044711172 | 2.19E-27    |
| ZNF446     | -1.045398475 | 6.95E-08    |

|            |              |             |
|------------|--------------|-------------|
| CAPN2      | -1.045696208 | 1.16E-25    |
| RASA4CP    | -1.046984788 | 0.00809348  |
| AC005332.5 | -1.047338896 | 1.96E-07    |
| CXCR4      | -1.047547294 | 2.67E-09    |
| AC021066.1 | -1.048022581 | 5.69E-73    |
| THNSL2     | -1.048034994 | 1.32E-20    |
| DKK1       | -1.04803766  | 8.06E-102   |
| RAB11B-AS1 | -1.048669123 | 0.000798713 |
| FAM214B    | -1.048754254 | 1.42E-08    |
| UPK3B      | -1.048928474 | 3.33E-42    |
| PLBD1-AS1  | -1.048935797 | 0.00092221  |
| C1orf116   | -1.049883169 | 3.29E-08    |
| AL139385.1 | -1.050626839 | 0.001075678 |
| L1CAM      | -1.052831187 | 1.36E-131   |
| THBS1      | -1.053536343 | 3.01E-66    |
| SYNM       | -1.054661774 | 2.86E-10    |
| TRGV9      | -1.055233284 | 0.000201183 |
| SNAI3-AS1  | -1.055398509 | 0.000258081 |
| FANK1      | -1.055445803 | 7.21E-08    |
| GPC2       | -1.055488848 | 0.001050994 |
| AC027601.1 | -1.055499909 | 0.000143791 |
| LYRM9      | -1.056420607 | 3.12E-05    |
| EMP1       | -1.05679326  | 7.54E-06    |
| ACBD4      | -1.057536816 | 1.75E-10    |
| TPO        | -1.058940432 | 0.0001676   |
| HHAT       | -1.059864306 | 6.80E-07    |
| ZG16B      | -1.060229582 | 3.94E-21    |
| CAMK2B     | -1.060784644 | 6.04E-05    |
| ABCC13     | -1.061133905 | 0.000236648 |
| EFR3B      | -1.061321363 | 2.82E-05    |
| WBP1       | -1.062140166 | 3.17E-11    |
| SH3TC1     | -1.064039832 | 2.39E-11    |
| TMEM198    | -1.064100722 | 0.000236366 |
| AC069281.2 | -1.06420289  | 0.007702591 |
| ACKR3      | -1.064321134 | 1.62E-14    |
| ABLIM3     | -1.064415714 | 5.06E-24    |
| APOLD1     | -1.065092172 | 2.03E-06    |
| CCN5       | -1.065336024 | 2.06E-28    |
| C2orf72    | -1.065996583 | 2.14E-07    |
| AC015712.6 | -1.066738137 | 7.35E-18    |
| ERICD      | -1.067257851 | 3.60E-07    |
| TMC4       | -1.067712828 | 1.49E-35    |
| RTN2       | -1.067845256 | 0.000713409 |
| ELFN1      | -1.069310938 | 1.93E-15    |
| EFNB3      | -1.06966578  | 1.41E-12    |
| APOBEC3F   | -1.070698311 | 0.000820336 |
| NFATC4     | -1.070712651 | 4.24E-05    |

|            |              |             |
|------------|--------------|-------------|
| SYT12      | -1.071546001 | 3.64E-74    |
| MID1       | -1.071606819 | 3.59E-69    |
| CPT1C      | -1.073135968 | 0.005647792 |
| SEMA3C     | -1.073436539 | 1.74E-186   |
| ASB9       | -1.073813216 | 0.001312134 |
| RASD1      | -1.074051492 | 4.03E-54    |
| MRC2       | -1.075422197 | 1.53E-17    |
| C9orf152   | -1.075947034 | 3.20E-19    |
| CGNL1      | -1.076206557 | 2.45E-07    |
| PNPLA7     | -1.077896075 | 1.53E-06    |
| EPS8L1     | -1.078054023 | 7.98E-44    |
| H3C6       | -1.078432983 | 7.68E-06    |
| SLC16A13   | -1.079997575 | 4.86E-08    |
| KRT19      | -1.080330755 | 2.25E-224   |
| PHLDA1     | -1.080912636 | 1.63E-35    |
| DUSP10     | -1.080921643 | 5.32E-05    |
| TM7SF2     | -1.082159322 | 3.32E-64    |
| ASIC3      | -1.08278813  | 2.71E-08    |
| ETNK2      | -1.083620317 | 5.89E-20    |
| REEP1      | -1.085550053 | 1.11E-05    |
| AC147651.1 | -1.085931277 | 1.61E-05    |
| LMO2       | -1.086320655 | 8.06E-06    |
| NHS        | -1.086837645 | 1.28E-39    |
| MTMR11     | -1.08707519  | 4.58E-22    |
| CDKL5      | -1.08908228  | 1.15E-19    |
| AC139099.1 | -1.090852571 | 2.70E-05    |
| NAV2       | -1.091206155 | 2.76E-134   |
| CLEC3A     | -1.09136515  | 4.39E-36    |
| FAM189A2   | -1.09194245  | 7.33E-09    |
| CRISPLD2   | -1.092083808 | 4.32E-05    |
| MELTF      | -1.092127998 | 9.40E-09    |
| DIPK1B     | -1.092920543 | 3.36E-09    |
| DBN1       | -1.093356678 | 1.66E-36    |
| NFKBIZ     | -1.093810429 | 2.20E-41    |
| ZBTB22     | -1.094093099 | 4.17E-26    |
| C14orf132  | -1.094151716 | 3.39E-25    |
| MXD4       | -1.095389488 | 4.25E-54    |
| CEACAM6    | -1.095815405 | 6.04E-186   |
| CLU        | -1.095982806 | 2.90E-179   |
| RIN2       | -1.09767087  | 1.48E-16    |
| SCNN1A     | -1.098932851 | 4.46E-13    |
| AREG       | -1.100242436 | 1.40E-34    |
| LIN7A      | -1.100324894 | 6.81E-10    |
| ZNF396     | -1.100443738 | 0.000650226 |
| USP51      | -1.101387376 | 5.49E-05    |
| ZNF784     | -1.101637362 | 2.56E-06    |
| RPL23AP87  | -1.103332137 | 0.000241141 |

|             |              |             |
|-------------|--------------|-------------|
| NRBP2       | -1.105153656 | 4.89E-09    |
| TMEM45B     | -1.105758185 | 6.15E-34    |
| CEACAM5     | -1.106666335 | 4.04E-08    |
| STON1       | -1.107014127 | 1.06E-07    |
| GLTPD2      | -1.107800012 | 0.000276642 |
| CACFD1      | -1.10849856  | 9.31E-37    |
| PYROXD2     | -1.108636639 | 8.48E-12    |
| OCEL1       | -1.109986006 | 6.04E-10    |
| TEX22       | -1.110041385 | 0.000824129 |
| NFATC2      | -1.110087384 | 7.57E-17    |
| MAST4       | -1.1104709   | 3.79E-82    |
| CMYA5       | -1.110609926 | 1.53E-16    |
| SLC25A29    | -1.110648852 | 6.65E-51    |
| ORAI3       | -1.111017206 | 1.09E-26    |
| ANKRD6      | -1.112901536 | 0.000931786 |
| TXNIP       | -1.113563403 | 1.50E-167   |
| ARSD        | -1.114453917 | 2.45E-56    |
| APH1B       | -1.116705264 | 1.55E-07    |
| IGFBP3      | -1.117052115 | 2.30E-20    |
| ADSS1       | -1.117215825 | 2.09E-12    |
| MMP13       | -1.117689552 | 1.09E-05    |
| ARHGAP33    | -1.117813608 | 2.01E-13    |
| POLD4       | -1.117921774 | 8.87E-44    |
| BPIFB1      | -1.118017822 | 1.84E-06    |
| A4GALT      | -1.118852132 | 2.23E-29    |
| DAPK2       | -1.118904049 | 9.39E-25    |
| BMERB1      | -1.119176274 | 1.66E-25    |
| CLSTN3      | -1.119469854 | 5.55E-13    |
| TP53I3      | -1.120396425 | 4.54E-17    |
| ZNF185      | -1.121160031 | 4.62E-82    |
| AMOTL2      | -1.122182606 | 1.57E-105   |
| EPHA4       | -1.123321372 | 7.16E-30    |
| HDAC11      | -1.124756319 | 2.01E-23    |
| RUNDC3A-AS1 | -1.125485399 | 5.66E-14    |
| DAB2        | -1.127362071 | 8.66E-10    |
| TFF1        | -1.127981309 | 2.68E-40    |
| PCDHAC2     | -1.129554283 | 9.98E-07    |
| LNCAROD     | -1.131547425 | 1.57E-06    |
| ATP2B4      | -1.133497272 | 1.06E-05    |
| RRAS        | -1.133798334 | 1.54E-17    |
| TMPRSS3     | -1.134269654 | 0.000228669 |
| FUT8-AS1    | -1.136156472 | 7.19E-05    |
| AC245100.8  | -1.136716375 | 0.001653983 |
| HELZ2       | -1.137835462 | 6.93E-40    |
| AC007686.3  | -1.138367015 | 0.000214132 |
| CLDN9       | -1.138739244 | 2.41E-19    |
| KNDC1       | -1.139073174 | 0.000377972 |



|            |              |             |
|------------|--------------|-------------|
| SLC22A18AS | -1.140970184 | 0.000590715 |
| GTF2IRD2   | -1.141137357 | 2.32E-10    |
| MB         | -1.141632092 | 8.59E-18    |
| ALS2CL     | -1.14221102  | 3.41E-10    |
| CBFA2T3    | -1.142291588 | 1.19E-54    |
| LINC02620  | -1.142803474 | 0.000886944 |
| LINC02321  | -1.14325966  | 0.001046742 |
| IFI6       | -1.144591553 | 3.72E-12    |
| AL354740.1 | -1.145282309 | 7.72E-05    |
| LHX1-DT    | -1.145412829 | 0.001371494 |
| ZMYND15    | -1.146305308 | 0.000205958 |
| TENT5B     | -1.148010549 | 0.00016398  |
| TGFB1      | -1.148163338 | 3.67E-26    |
| ARHGD1B    | -1.152276075 | 0.001362276 |
| KLF6       | -1.152601846 | 2.08E-34    |
| PLXNB3     | -1.154272766 | 8.25E-15    |
| LOXL1-AS1  | -1.154857776 | 2.20E-14    |
| SYNGR3     | -1.154870374 | 1.76E-16    |
| TUBB3      | -1.156481256 | 9.00E-128   |
| PAQR7      | -1.157155538 | 2.56E-10    |
| ADAMTS13   | -1.158349712 | 3.20E-11    |
| RAB4B      | -1.158826759 | 2.25E-12    |
| SYNPO      | -1.159445211 | 1.73E-10    |
| PPL        | -1.159584266 | 4.56E-152   |
| TINCR      | -1.160439267 | 3.99E-48    |
| ALDH1A3    | -1.161505086 | 2.97E-41    |
| SLC25A42   | -1.162048029 | 8.73E-18    |
| LIF        | -1.162341752 | 3.45E-32    |
| IFITM10    | -1.162589906 | 8.69E-05    |
| COL6A2     | -1.163338645 | 1.31E-07    |
| LOXL2      | -1.164750803 | 4.52E-206   |
| GSTM4      | -1.166410426 | 7.97E-64    |
| PRRT2      | -1.168815169 | 2.44E-09    |
| DYRK1B     | -1.16892641  | 6.73E-30    |
| NRCAM      | -1.169153083 | 1.72E-84    |
| OAS1       | -1.169184877 | 0.000151445 |
| TP53INP1   | -1.17004497  | 1.24E-20    |
| INHA       | -1.170806474 | 2.95E-07    |
| MAB21L4    | -1.171804723 | 4.15E-15    |
| C1QTNF6    | -1.174902553 | 1.14E-207   |
| SCN8A      | -1.175293595 | 1.83E-06    |
| CNIH2      | -1.176451006 | 0.000244575 |
| APOL6      | -1.18045466  | 3.65E-12    |
| ATP2A3     | -1.181330716 | 3.41E-185   |
| PLTP       | -1.181401686 | 0.000134939 |
| EFNA2      | -1.182325332 | 0.001086694 |
| CLCF1      | -1.182708607 | 2.47E-14    |

|            |              |             |
|------------|--------------|-------------|
| LMO7       | -1.182952048 | 4.00E-94    |
| CORO1A     | -1.183058925 | 1.80E-20    |
| PTPRM      | -1.183418495 | 1.70E-09    |
| RAB26      | -1.184020958 | 5.31E-13    |
| AC244197.3 | -1.184628628 | 8.44E-09    |
| MDGA2      | -1.18594841  | 6.04E-06    |
| EBF4       | -1.187871085 | 0.001594397 |
| FAM66B     | -1.188571475 | 0.002270602 |
| PAPSS2     | -1.189129372 | 1.81E-164   |
| MAOA       | -1.18985766  | 1.99E-08    |
| TMEM191B   | -1.189950384 | 0.000186131 |
| KRT87P     | -1.190649205 | 5.72E-08    |
| F3         | -1.191382335 | 4.26E-11    |
| RAI2       | -1.191561398 | 0.00033987  |
| SCX        | -1.1915868   | 2.81E-10    |
| KRT15      | -1.192428149 | 1.26E-16    |
| ERP27      | -1.19366595  | 1.92E-13    |
| ZFHx2      | -1.197645495 | 0.000221669 |
| ITGA2      | -1.198047586 | 5.28E-99    |
| SYTL4      | -1.202419475 | 1.23E-10    |
| COL5A2     | -1.202875777 | 3.23E-13    |
| SCN1B      | -1.203219198 | 1.56E-13    |
| TCP11L2    | -1.203364012 | 8.62E-08    |
| LRRC6      | -1.208594181 | 0.00055307  |
| ULK1       | -1.2087994   | 5.67E-108   |
| TMSB4X     | -1.209549267 | 5.91E-272   |
| VPS9D1     | -1.210357077 | 1.02E-19    |
| PLA2G10    | -1.210647232 | 1.16E-05    |
| GREB1      | -1.211643543 | 0.001178956 |
| CAMK2N1    | -1.212045336 | 1.65E-119   |
| SPNS2      | -1.213480546 | 2.19E-50    |
| ARID5B     | -1.215232939 | 9.66E-36    |
| CYP4F11    | -1.216000128 | 5.31E-05    |
| MUC20      | -1.216278204 | 5.96E-30    |
| TESK2      | -1.216434691 | 0.000244845 |
| ESPN       | -1.223213444 | 1.50E-16    |
| MAFF       | -1.223390853 | 1.47E-15    |
| EFEMP1     | -1.224492524 | 2.91E-22    |
| LMNTD2-AS1 | -1.225819951 | 1.85E-05    |
| KCNN4      | -1.226116177 | 2.29E-19    |
| LINC02732  | -1.226226381 | 3.82E-45    |
| CAPN13     | -1.226797221 | 0.000293675 |
| PSMG3-AS1  | -1.227599554 | 6.84E-48    |
| SCARA3     | -1.228536995 | 7.24E-32    |
| GNG7       | -1.228766477 | 4.27E-09    |
| SELENBP1   | -1.229216944 | 1.14E-13    |
| TMEM8B     | -1.230497333 | 2.26E-06    |

|            |              |             |
|------------|--------------|-------------|
| USH1G      | -1.231961006 | 2.87E-16    |
| FN1        | -1.232068069 | 1.32E-85    |
| DIRC3      | -1.232098441 | 1.40E-05    |
| CMPK2      | -1.232320971 | 0.000188215 |
| AC008014.1 | -1.233129676 | 0.000244523 |
| CYP26B1    | -1.233326177 | 4.14E-06    |
| INPP4B     | -1.235226641 | 3.19E-123   |
| ZNF879     | -1.235476399 | 0.000163986 |
| PAPLN      | -1.235701532 | 4.08E-06    |
| DOK7       | -1.235748888 | 1.14E-26    |
| PGM5       | -1.236230612 | 2.76E-08    |
| LGALS1     | -1.23670446  | 1.60E-123   |
| SLC4A3     | -1.237185415 | 1.40E-08    |
| ABTB1      | -1.238083588 | 1.35E-20    |
| ACOX2      | -1.238114182 | 0.00099289  |
| COL6A1     | -1.238946471 | 0.000295417 |
| CSRP2      | -1.239485339 | 1.80E-07    |
| ZCCHC12    | -1.241125743 | 0.000302882 |
| ARHGEF37   | -1.241886918 | 8.60E-05    |
| SERPINA3   | -1.242900027 | 6.05E-08    |
| FGD5       | -1.24296849  | 2.10E-05    |
| ITGB4      | -1.243242925 | 3.62E-173   |
| STEAP4     | -1.243879339 | 7.67E-17    |
| PCOLCE     | -1.247157825 | 3.23E-17    |
| RND1       | -1.248622478 | 1.33E-31    |
| FSCN2      | -1.251065035 | 2.91E-05    |
| LTBP2      | -1.25358502  | 1.34E-08    |
| SOWAHB     | -1.254855495 | 3.34E-13    |
| RPS6KA2    | -1.25488776  | 1.48E-13    |
| HLA-DQB1   | -1.268108152 | 1.89E-51    |
| KIAA1210   | -1.269377895 | 1.89E-09    |
| BDKRB2     | -1.270685233 | 1.99E-78    |
| NES        | -1.271682657 | 5.04E-09    |
| SPINK1     | -1.272219417 | 0.00024913  |
| DDAH2      | -1.272713792 | 1.42E-67    |
| TNFAIP2    | -1.273044085 | 2.17E-05    |
| TGFB2      | -1.273144687 | 1.10E-23    |
| TMEM40     | -1.273632271 | 6.53E-13    |
| JAKMIP2    | -1.277548236 | 2.36E-17    |
| SCIN       | -1.280479957 | 0.000174495 |
| RUNX2      | -1.281201113 | 0.000100825 |
| ZSWIM4     | -1.281490543 | 9.53E-14    |
| PRICKLE2   | -1.281959234 | 2.48E-05    |
| ZNF682     | -1.284734377 | 1.15E-05    |
| AC144450.1 | -1.284934041 | 4.89E-08    |
| GPRC5A     | -1.285935651 | 3.33E-254   |
| EDN1       | -1.286142769 | 2.46E-07    |

|            |              |             |
|------------|--------------|-------------|
| THSD4      | -1.286217829 | 5.85E-49    |
| LYPD3      | -1.286621798 | 5.44E-52    |
| MAGED4B    | -1.290896982 | 2.27E-05    |
| PBXIP1     | -1.292156122 | 9.25E-66    |
| TSPAN1     | -1.292808834 | 1.83E-20    |
| ENTPD2     | -1.293063442 | 6.91E-10    |
| COL27A1    | -1.295397157 | 4.50E-10    |
| RAP1GAP    | -1.295404397 | 4.67E-50    |
| WNT9A      | -1.295768095 | 2.62E-06    |
| CLIC3      | -1.296480364 | 7.75E-94    |
| TMEM139    | -1.296560771 | 1.18E-07    |
| MYPN       | -1.296923547 | 1.16E-21    |
| FOS        | -1.29773589  | 7.41E-62    |
| SYTL2      | -1.298986287 | 1.15E-261   |
| CAPN8      | -1.301302545 | 5.67E-10    |
| IFIT1      | -1.301840294 | 0.000255094 |
| AC022034.1 | -1.303696009 | 2.14E-10    |
| ADCY5      | -1.304217446 | 8.85E-69    |
| NEURL1B    | -1.304972937 | 3.21E-37    |
| ADAMTSL5   | -1.305364504 | 8.39E-19    |
| ADORA1     | -1.305372026 | 2.43E-18    |
| MAP2       | -1.308592854 | 3.13E-11    |
| PLA2G4F    | -1.309505992 | 1.03E-08    |
| TUBA1A     | -1.310649009 | 7.43E-80    |
| KLK6       | -1.311127898 | 3.64E-06    |
| FGD3       | -1.312177135 | 4.79E-113   |
| HMCN1      | -1.312330509 | 1.37E-64    |
| PRSS23     | -1.313201631 | 3.20E-23    |
| SLFN5      | -1.314853334 | 2.37E-22    |
| IRF9       | -1.315186254 | 1.36E-24    |
| INHBA      | -1.317157558 | 2.12E-35    |
| AC068580.3 | -1.319559309 | 3.53E-05    |
| MVP        | -1.319981203 | 6.76E-61    |
| DIO2       | -1.323652313 | 5.84E-20    |
| RET        | -1.324536253 | 1.79E-101   |
| IRF7       | -1.325569736 | 3.28E-13    |
| MST1R      | -1.325986427 | 6.49E-11    |
| FER1L4     | -1.334590057 | 8.75E-11    |
| NOXA1      | -1.334796326 | 2.49E-17    |
| VSIR       | -1.334909908 | 5.35E-06    |
| AL590822.3 | -1.334998619 | 0.000320004 |
| C19orf33   | -1.33520091  | 1.20E-43    |
| UGT1A6     | -1.338319696 | 1.01E-07    |
| CASKIN1    | -1.339402731 | 1.77E-06    |
| MARCKS     | -1.339921114 | 4.39E-36    |
| EGR3       | -1.341480702 | 4.63E-18    |
| COL9A2     | -1.342789048 | 2.30E-13    |

|            |              |           |
|------------|--------------|-----------|
| CDKN2B     | -1.343686281 | 1.46E-72  |
| MUC1       | -1.345758933 | 8.31E-40  |
| SYTL5      | -1.350291555 | 1.86E-41  |
| CDK14      | -1.357562031 | 2.23E-06  |
| TNS1       | -1.35790573  | 1.91E-08  |
| DUSP6      | -1.358035329 | 2.63E-05  |
| ABCA7      | -1.358148943 | 5.28E-14  |
| MICAL1     | -1.35996139  | 6.86E-31  |
| MAPK4      | -1.361158091 | 8.52E-16  |
| RAB19      | -1.363481906 | 9.29E-08  |
| LAMB3      | -1.367023235 | 5.70E-09  |
| MAFB       | -1.372611802 | 9.86E-07  |
| KLF7       | -1.3736537   | 6.88E-08  |
| CHRD       | -1.373995516 | 5.91E-27  |
| TRIM29     | -1.377174764 | 1.22E-09  |
| FAM155A    | -1.380297972 | 2.01E-13  |
| DUSP4      | -1.380629583 | 6.85E-290 |
| CTSO       | -1.382003281 | 4.23E-08  |
| SPOCK1     | -1.388083418 | 4.38E-29  |
| SPEG       | -1.388687134 | 5.84E-10  |
| TLCD2      | -1.390387073 | 1.45E-15  |
| DDX60L     | -1.391890213 | 1.15E-05  |
| MYEOV      | -1.394012161 | 1.75E-82  |
| LOXL1      | -1.397738638 | 1.29E-08  |
| C17orf82   | -1.398489583 | 9.44E-10  |
| AC040970.1 | -1.399256869 | 2.94E-05  |
| SUSD2      | -1.400785488 | 6.05E-10  |
| CRAT       | -1.400798552 | 1.29E-06  |
| MT2A       | -1.402445398 | 9.11E-87  |
| NTN4       | -1.403617276 | 1.46E-76  |
| CCNG2      | -1.407877726 | 5.71E-64  |
| SAMD9      | -1.409063656 | 3.00E-20  |
| MST1       | -1.413859018 | 1.45E-06  |
| ALPK3      | -1.415773178 | 1.95E-26  |
| ST6GALNAC2 | -1.416327617 | 8.53E-45  |
| TNFSF15    | -1.416393118 | 1.68E-07  |
| PXDC1      | -1.417173771 | 3.12E-08  |
| MEIS3      | -1.420736597 | 1.73E-22  |
| SLC16A2    | -1.421672413 | 2.28E-07  |
| ABAT       | -1.423057129 | 6.39E-142 |
| CHST3      | -1.428218828 | 5.43E-05  |
| UBA7       | -1.432293805 | 1.37E-09  |
| MEGF6      | -1.433583174 | 3.49E-52  |
| ZNF175     | -1.442778373 | 1.29E-20  |
| COL12A1    | -1.442855125 | 6.68E-33  |
| MALL       | -1.446178391 | 3.06E-117 |
| JPH2       | -1.446641549 | 4.36E-34  |

|            |              |           |
|------------|--------------|-----------|
| MATN3      | -1.447166084 | 6.98E-18  |
| ABCC3      | -1.450901433 | 1.58E-178 |
| DNAJB5     | -1.453978134 | 3.01E-08  |
| MAF        | -1.458302643 | 5.06E-05  |
| APCDD1     | -1.460501011 | 8.91E-15  |
| GDF15      | -1.464876897 | 1.58E-75  |
| FAT4       | -1.465673799 | 1.10E-14  |
| ITGB6      | -1.467889365 | 5.97E-140 |
| SH3PXD2A   | -1.468364697 | 2.68E-09  |
| MRPL23-AS1 | -1.480406366 | 5.76E-07  |
| ADGRF4     | -1.487420897 | 2.91E-16  |
| MME        | -1.48850875  | 3.48E-09  |
| DDX60      | -1.490744133 | 4.55E-12  |
| RIPOR3     | -1.490891291 | 8.48E-13  |
| SEMA3B     | -1.49173959  | 3.69E-91  |
| POC1B-AS1  | -1.492414893 | 5.58E-06  |
| TCIM       | -1.492600006 | 1.85E-36  |
| PRR15      | -1.492764744 | 2.19E-22  |
| LINC02600  | -1.496983671 | 6.17E-07  |
| SEMA5B     | -1.497024672 | 8.64E-22  |
| AC004264.1 | -1.499308099 | 6.66E-07  |
| LAMC2      | -1.50082616  | 8.70E-36  |
| CALML5     | -1.513047724 | 3.95E-17  |
| GLRA3      | -1.516461242 | 2.39E-09  |
| AL157935.2 | -1.536431337 | 1.59E-06  |
| AC005821.1 | -1.537652446 | 6.69E-17  |
| LHFPL6     | -1.543287813 | 1.59E-23  |
| CCDC83     | -1.545669225 | 4.51E-06  |
| PRR36      | -1.549457348 | 2.20E-10  |
| BANK1      | -1.551582741 | 1.69E-06  |
| PSG9       | -1.559966042 | 2.11E-26  |
| CAPN9      | -1.563987155 | 3.74E-10  |
| AC015802.6 | -1.581077462 | 2.39E-08  |
| RASGRP1    | -1.584197273 | 3.16E-28  |
| NT5E       | -1.59828565  | 3.45E-119 |
| TMPRSS4    | -1.599985514 | 3.01E-08  |
| LRRC15     | -1.602236333 | 2.28E-19  |
| CYSRT1     | -1.609924108 | 1.27E-38  |
| CCN2       | -1.615919441 | 8.32E-13  |
| BHLHE41    | -1.617215461 | 5.85E-11  |
| AL590004.3 | -1.62313914  | 4.52E-33  |
| AC110619.1 | -1.626839393 | 9.56E-73  |
| ABCA4      | -1.630931089 | 8.63E-58  |
| MIR503HG   | -1.654378633 | 6.94E-20  |
| AQP3       | -1.656546033 | 8.59E-146 |
| AC006372.2 | -1.658803087 | 1.50E-19  |
| MGP        | -1.660559392 | 3.49E-09  |

|            |              |           |
|------------|--------------|-----------|
| CEMIP      | -1.665680398 | 4.32E-116 |
| SSPO       | -1.669198224 | 3.91E-11  |
| EDIL3      | -1.679434401 | 1.35E-23  |
| AFAP1L2    | -1.683489524 | 1.69E-13  |
| AC010735.2 | -1.686556716 | 2.13E-08  |
| AC006372.1 | -1.687781372 | 1.35E-08  |
| PLXNA2     | -1.699029804 | 7.03E-29  |
| MYO15B     | -1.724971113 | 4.41E-07  |
| PHLDB2     | -1.726783792 | 2.86E-12  |
| NEDD9      | -1.731911662 | 8.86E-24  |
| ACHE       | -1.733207809 | 2.32E-13  |
| SLC4A4     | -1.781333333 | 7.34E-10  |
| SLCO2A1    | -1.7841157   | 1.21E-22  |
| KRT16      | -1.79773724  | 8.77E-08  |
| LINC01213  | -1.807804024 | 2.09E-07  |
| RNF224     | -1.810867937 | 2.60E-14  |
| SNAI2      | -1.815639806 | 1.47E-13  |
| COL5A1     | -1.833345824 | 2.37E-122 |
| TNFRSF11B  | -1.839125962 | 7.19E-16  |
| VGLL1      | -1.888013739 | 3.00E-12  |
| LINC00365  | -1.892287133 | 6.44E-12  |
| LINC02747  | -1.919900894 | 3.69E-27  |
| ALPP       | -1.942288035 | 1.20E-14  |
| PSCA       | -1.991706289 | 1.47E-25  |
| SERPINE1   | -2.456583165 | 4.30E-17  |

**Table S9:** 2309 mRNAs with genotype-dependent differences in c-MYC-induced regulation

| Gene symbol | padj     | Gene symbol | padj     | Gene symbol | padj     |
|-------------|----------|-------------|----------|-------------|----------|
| DEGS1       | 3.06E-43 | JDP2        | 0.002193 | DCLRE1A     | 0.018639 |
| KRT81       | 1.64E-39 | MBOAT2      | 0.002209 | RPL38       | 0.018639 |
| LIPA        | 3.64E-38 | SLC39A11    | 0.002209 | ZMYND8      | 0.018639 |
| F2RL1       | 3.39E-32 | DEPDC1      | 0.002211 | GPD2        | 0.018648 |
| CDKN1A      | 1.23E-31 | EIF3E       | 0.002211 | GDF11       | 0.018648 |
| FDXR        | 2.37E-27 | UBA52       | 0.002218 | THNSL1      | 0.018761 |
| CYFIP2      | 2.44E-25 | ADAR        | 0.002234 | TMEM11      | 0.018934 |
| TAP1        | 4.64E-25 | PRMT1       | 0.002264 | EEF1AKNMT   | 0.018968 |
| IRF2BP2     | 6.12E-24 | ZWINT       | 0.002265 | SLC22A5     | 0.01903  |
| ITGB5       | 1.92E-22 | NT5C2       | 0.002269 | PRKCSH      | 0.01903  |
| SESN1       | 8.24E-21 | ZDHHC9      | 0.002281 | SLC39A10    | 0.019236 |
| COTL1       | 3.00E-20 | TYSND1      | 0.002284 | ANKRD13B    | 0.019236 |
| ALDH3B2     | 9.73E-20 | SLC25A39    | 0.002284 | HM13        | 0.019236 |
| HS3ST3B1    | 2.32E-19 | FKBP1A      | 0.002284 | FUT4        | 0.01924  |
| CTNNAL1     | 7.48E-19 | KHDC1       | 0.002296 | FANCD2      | 0.019353 |
| TM7SF3      | 1.62E-18 | SPAG5       | 0.002297 | NUDT21      | 0.019365 |
| STC2        | 2.89E-17 | PINK1       | 0.0023   | DIP2C       | 0.019434 |
| GRIN2C      | 1.02E-16 | IFIT1       | 0.0023   | GTF2IRD2    | 0.019438 |
| PFKP        | 1.92E-16 | KIF18A      | 0.00232  | HOXC13      | 0.019438 |
| CEBPB       | 4.97E-16 | ZNF496      | 0.002348 | MAL2        | 0.019452 |
| SHB         | 2.73E-14 | USP37       | 0.002354 | NOL7        | 0.019481 |
| ID3         | 7.97E-14 | STOML2      | 0.002354 | SLC66A1     | 0.019497 |
| MET         | 8.20E-14 | SLBP        | 0.002412 | EGFR        | 0.019555 |
| HPCAL1      | 9.05E-14 | SLC6A6      | 0.002418 | SOWAHC      | 0.019593 |
| PIK3R3      | 2.35E-13 | EIF4A2      | 0.002424 | ABLIM1      | 0.019593 |
| ZMAT3       | 2.35E-13 | MPHOSPH6    | 0.002436 | P2RY2       | 0.019642 |
| AC093001,1  | 3.11E-13 | SRSF4       | 0.002477 | NGRN        | 0.019642 |
| PHLDA3      | 5.64E-13 | KNL1        | 0.002477 | FAM225A     | 0.019693 |
| ITGB1       | 8.27E-13 | MOCOS       | 0.002506 | B4GALT3     | 0.019758 |
| ADORA2B     | 1.64E-12 | RPLP1       | 0.002506 | TARS1       | 0.019758 |
| CD59        | 2.56E-12 | NRIP1       | 0.002506 | MTBP        | 0.019758 |
| GRHL3       | 4.75E-12 | UNC93B1     | 0.002506 | EHBP1L1     | 0.019758 |
| TPD52       | 6.46E-12 | C2CD5       | 0.002506 | LSM10       | 0.019776 |
| POLH        | 8.71E-12 | GNA11       | 0.002508 | MRPS18B     | 0.019776 |
| HPS3        | 8.74E-12 | HMGCS1      | 0.002509 | APTR        | 0.019776 |
| PGRMC1      | 1.24E-11 | LRPAP1      | 0.002518 | TMC6        | 0.019776 |
| FAM102B     | 2.61E-11 | RPS3A       | 0.002518 | EIF3K       | 0.019776 |
| KYNU        | 3.88E-11 | IL10RB-DT   | 0.002518 | PLCG1       | 0.019776 |
| EIF4EBP1    | 1.61E-10 | DGCR8       | 0.002533 | DAP3        | 0.019846 |
| ABHD17C     | 1.83E-10 | DPP7        | 0.002537 | ASAP2       | 0.019846 |
| SLC35C1     | 1.87E-10 | DDX58       | 0.002548 | PUF60       | 0.019846 |
| ADAMTS19    | 2.35E-10 | MFSD1       | 0.002566 | NEDD4       | 0.019846 |
| LTBP3       | 3.18E-10 | ZBTB2       | 0.002566 | TMED3       | 0.019846 |



|          |          |           |          |          |          |
|----------|----------|-----------|----------|----------|----------|
| GLMP     | 3.78E-10 | APOBEC3B  | 0.002566 | HMGB3    | 0.019846 |
| TP53INP1 | 4.26E-10 | VASP      | 0.002582 | PTPN18   | 0.019868 |
| ASS1     | 4.28E-10 | GRB2      | 0.002619 | RBL2     | 0.019868 |
| DBN1     | 5.89E-10 | PPP6R1    | 0.002631 | FBXW9    | 0.019876 |
| NUSAP1   | 6.47E-10 | CCDC90B   | 0.002638 | FIRRE    | 0.019903 |
| ITPR1    | 8.38E-10 | C5        | 0.002645 | SLC9A2   | 0.01995  |
| ADIPOR2  | 8.38E-10 | RPL37     | 0.002651 | TET2     | 0.01995  |
| MOSPD1   | 1.05E-09 | RPS27     | 0.002654 | CBR1     | 0.01995  |
| OAS2     | 1.36E-09 | SULT2B1   | 0.002656 | DCUN1D5  | 0.019975 |
| SYT7     | 1.59E-09 | EML1      | 0.002659 | THOC1    | 0.020034 |
| UACA     | 2.00E-09 | UBE2C     | 0.002689 | FNBP1L   | 0.020044 |
| ETS2     | 2.13E-09 | MIS18BP1  | 0.002713 | TMEM165  | 0.020052 |
| CHFR     | 5.07E-09 | NDUFB8    | 0.002713 | MRGBP    | 0.020052 |
| FAM118A  | 5.20E-09 | TMEM170B  | 0.002715 | ARFGAP1  | 0.020071 |
| LDHA     | 5.98E-09 | CENPU     | 0.002717 | NOP10    | 0.020109 |
| TACC1    | 7.70E-09 | TIMP2     | 0.002731 | ZNF771   | 0.020109 |
| PPM1D    | 7.70E-09 | PARP9     | 0.002748 | PIGP     | 0.02011  |
| MALAT1   | 1.46E-08 | USP1      | 0.002762 | RPL22L1  | 0.020158 |
| YPEL2    | 2.25E-08 | FAM83D    | 0.002762 | IL6R     | 0.020228 |
| MRPL34   | 2.25E-08 | CEP55     | 0.002779 | CDKL5    | 0.020361 |
| RHPN2    | 2.54E-08 | CNPY2     | 0.002783 | GOLGA7   | 0.020451 |
| DNAJC1   | 2.56E-08 | TCAF1     | 0.002804 | CHID1    | 0.020451 |
| ASPH     | 2.56E-08 | WDR76     | 0.002805 | TRIM25   | 0.020451 |
| PHLDB1   | 2.59E-08 | ZC3HAV1   | 0.002837 | NPTXR    | 0.020451 |
| HSPA5    | 2.89E-08 | RAB11FIP1 | 0.002858 | IMPDH1   | 0.020466 |
| GTF3A    | 2.89E-08 | INPP4B    | 0.002866 | FTSJ1    | 0.020469 |
| RPS27L   | 2.94E-08 | CRY2      | 0.002866 | TOM1     | 0.020494 |
| OAS3     | 2.95E-08 | RFX5      | 0.002897 | FIBCD1   | 0.020622 |
| TNFAIP3  | 3.63E-08 | EXOSC5    | 0.002897 | TSPAN3   | 0.02066  |
| PSAP     | 3.99E-08 | RPS18     | 0.002898 | ZYX      | 0.020667 |
| ACER2    | 4.08E-08 | ZNF367    | 0.002898 | RSL1D1   | 0.020689 |
| NAGK     | 4.52E-08 | SNHG7     | 0.002898 | FIGN     | 0.020835 |
| LIMK2    | 4.52E-08 | MCM6      | 0.002915 | MRPL12   | 0.020914 |
| PYGB     | 4.82E-08 | SEC16A    | 0.002919 | PCM1     | 0.020975 |
| RAP2B    | 6.00E-08 | UBN1      | 0.002934 | SYK      | 0.021063 |
| TNFSF15  | 6.15E-08 | ATP6V0B   | 0.002943 | MTFR1L   | 0.021165 |
| PKM      | 6.91E-08 | EIF3I     | 0.002955 | RAP1GDS1 | 0.021205 |
| RAB27B   | 7.64E-08 | TMTC2     | 0.002969 | CBLB     | 0.021231 |
| EGR1     | 9.50E-08 | RELB      | 0.003011 | APRT     | 0.021231 |
| APBB2    | 1.01E-07 | RPL34     | 0.003037 | POLA1    | 0.021231 |
| PGGHG    | 1.17E-07 | GRSF1     | 0.003054 | MTCO1P12 | 0.021235 |
| CHAC1    | 1.19E-07 | WDR77     | 0.003058 | DHPS     | 0.021295 |
| ADGRG6   | 1.19E-07 | TPM2      | 0.003058 | ATF3     | 0.021334 |
| BTG2     | 1.20E-07 | POLD3     | 0.003068 | SOX4     | 0.021334 |
| TIGAR    | 1.20E-07 | ZNF443    | 0.003068 | SEMA4D   | 0.021334 |
| VPS18    | 1.28E-07 | TMEM184A  | 0.003073 | SLF2     | 0.021334 |
| LPCAT4   | 1.60E-07 | PPM1J     | 0.003086 | FZD4     | 0.021397 |

|          |          |           |          |         |          |
|----------|----------|-----------|----------|---------|----------|
| SLC45A3  | 1.63E-07 | PEPD      | 0.003087 | PAK1IP1 | 0.021402 |
| ISCU     | 2.27E-07 | INCENP    | 0.003093 | SLX4IP  | 0.021402 |
| IRX2     | 3.24E-07 | VAPB      | 0.003108 | YDJC    | 0.021405 |
| HELZ2    | 3.30E-07 | BCL9      | 0.003112 | NDUFB2  | 0.021426 |
| JADE1    | 3.36E-07 | TTC7A     | 0.003112 | POGZ    | 0.02144  |
| WDFY1    | 3.44E-07 | FAS       | 0.003112 | CA5BP1  | 0.02144  |
| GDF15    | 3.46E-07 | UBR7      | 0.003112 | DIO2    | 0.021461 |
| IKZF2    | 4.22E-07 | MAP11     | 0.003123 | PHPT1   | 0.021464 |
|          |          | MAPKAPK5- |          |         |          |
| ANP32A   | 4.22E-07 | AS1       | 0.003164 | ITGA2   | 0.021474 |
| CYB5A    | 4.46E-07 | PDXP      | 0.003164 | INTS6L  | 0.02149  |
| ERO1A    | 4.61E-07 | NDC80     | 0.003176 | HNRNPDL | 0.021518 |
| ITGA6    | 5.09E-07 | NFKBIZ    | 0.003183 | CBS     | 0.021574 |
| KIF20A   | 5.81E-07 | SNHG29    | 0.003189 | CHMP2B  | 0.021608 |
| STIL     | 6.01E-07 | IFIH1     | 0.00321  | MCUR1   | 0.021608 |
| KCNG1    | 6.95E-07 | KLHL5     | 0.003212 | AUP1    | 0.021677 |
| ZFP36L2  | 7.00E-07 | MIS12     | 0.003223 | FBXO5   | 0.021677 |
| NCAM2    | 7.01E-07 | IL27RA    | 0.00329  | RAB15   | 0.021677 |
| ENTR1    | 7.93E-07 | TRNP1     | 0.003296 | STK38   | 0.021695 |
| DVL1     | 9.08E-07 | CCDC88C   | 0.003315 | PCGF6   | 0.021983 |
| BAG1     | 9.08E-07 | TIMM23    | 0.003321 | ADCK2   | 0.02212  |
| AEN      | 9.08E-07 | WDR45     | 0.003332 | IMPAD1  | 0.022169 |
| BACE2    | 9.08E-07 | PPIC      | 0.003336 | OSBPL6  | 0.022249 |
| PLCD3    | 9.75E-07 | CNIH1     | 0.003363 | SMIM26  | 0.022258 |
| FHDC1    | 1.12E-06 | POLR3K    | 0.003396 | BRMS1   | 0.022502 |
| STAT6    | 1.12E-06 | AHSA1     | 0.003398 | ZNF580  | 0.022533 |
| RPS6KL1  | 1.12E-06 | ERBB3     | 0.0034   | EMC6    | 0.022536 |
| PRKCA    | 1.29E-06 | PLPPR2    | 0.0034   | SULF2   | 0.02257  |
| NBPF4    | 1.37E-06 | SDF2L1    | 0.0034   | SELENOS | 0.022626 |
| CENPF    | 1.38E-06 | KLF9      | 0.003409 | PTRH2   | 0.02264  |
| BDH1     | 1.38E-06 | CMTM8     | 0.003426 | IQGAP1  | 0.022653 |
| CCNA2    | 1.38E-06 | FYN       | 0.003443 | TMEM222 | 0.022716 |
| EGLN3    | 1.43E-06 | COPZ1     | 0.003451 | TTYH3   | 0.022716 |
| LACTB    | 1.43E-06 | RAMAC     | 0.00348  | SPDEF   | 0.022762 |
| APOL6    | 1.43E-06 | RPL17     | 0.00353  | TTC4    | 0.022862 |
| BRIP1    | 1.50E-06 | ARFIP2    | 0.003533 | HEATR6  | 0.022862 |
| PPP1R2   | 1.62E-06 | PSMB10    | 0.003533 | PLK4    | 0.022944 |
| RHOBTB2  | 1.62E-06 | CDC6      | 0.003533 | CMSS1   | 0.022991 |
| SPTSSA   | 1.62E-06 | NFATC2    | 0.003533 | HSPA1B  | 0.02305  |
| ATP6V0A4 | 1.75E-06 | CEBPZOS   | 0.003541 | CHAC2   | 0.023094 |
| RPL15    | 1.77E-06 | TNFRSF21  | 0.003556 | PFDN6   | 0.023094 |
| OAS1     | 1.89E-06 | WARS2-AS1 | 0.003559 | SYNJ2BP | 0.023094 |
| SPHK1    | 1.89E-06 | ETF1      | 0.003568 | PDPR    | 0.023094 |
| CCNG1    | 1.92E-06 | NEURL1B   | 0.003573 | IP6K2   | 0.02311  |
| BZW1     | 2.05E-06 | MFSD3     | 0.003573 | FEM1B   | 0.02311  |
| FAM50A   | 2.11E-06 | NAT9      | 0.003573 | ANXA9   | 0.023154 |
| TYRO3    | 2.18E-06 | AURKA     | 0.003573 | CEP97   | 0.023249 |

|            |          |          |          |            |          |
|------------|----------|----------|----------|------------|----------|
| ARNT2      | 2.38E-06 | CNOT7    | 0.003577 | PDLIM7     | 0.023249 |
| TPX2       | 2.95E-06 | INKA2    | 0.003586 | RNF125     | 0.023249 |
| EEF1A2     | 2.95E-06 | SPINT2   | 0.003612 | PKMYT1     | 0.023429 |
| DLG3       | 2.96E-06 | TCF19    | 0.003661 | OSTC       | 0.023441 |
| USP2       | 3.21E-06 | NRF1     | 0.003661 | PSRC1      | 0.023527 |
| MBNL2      | 3.26E-06 | CHAF1B   | 0.003683 | TPRN       | 0.023527 |
| ZNF385A    | 3.32E-06 | ARHGEF18 | 0.003709 | SRSF6      | 0.023584 |
| IQGAP3     | 3.72E-06 | DNAJC11  | 0.00371  | VGLL1      | 0.023584 |
| CCDC78     | 3.72E-06 | TSPAN14  | 0.00371  | FTL        | 0.023597 |
| ENO1       | 4.12E-06 | PHLDA2   | 0.003721 | SNHG10     | 0.023633 |
| NEK6       | 4.22E-06 | FNDC10   | 0.003731 | NAA10      | 0.023633 |
| ENTPD6     | 4.22E-06 | NRCAM    | 0.003731 | ATIC       | 0.023646 |
| DOCK11     | 4.35E-06 | BAX      | 0.003735 | MARK3      | 0.023729 |
| HECTD3     | 4.95E-06 | RPS14    | 0.003845 | MANF       | 0.023784 |
| CUTA       | 5.26E-06 | SNHG26   | 0.003845 | PDCD10     | 0.023784 |
| CPEB4      | 5.30E-06 | UBXN8    | 0.003849 | KCTD1      | 0.023795 |
| FERMT1     | 5.30E-06 | SHCBP1   | 0.003849 | PLEKHS1    | 0.023807 |
| FAM78A     | 5.94E-06 | AGAP3    | 0.003854 | NADSYN1    | 0.023813 |
| FAHD1      | 6.27E-06 | TMPO     | 0.00387  | SOWAHB     | 0.023836 |
| ARL6IP5    | 6.35E-06 | CDC20    | 0.003873 | LYRM4      | 0.023836 |
| AC021087,5 | 6.41E-06 | ATP5MD   | 0.003881 | PPT2       | 0.023836 |
| IGDCC3     | 6.52E-06 | CLN3     | 0.003881 | FAM241A    | 0.023876 |
| SLC12A9    | 6.86E-06 | NLGN2    | 0.003881 | ARHGDI1A   | 0.023876 |
| ECE1       | 7.33E-06 | LMO7     | 0.003971 | DIAPH3     | 0.023911 |
| BMP7       | 7.46E-06 | PLXNB3   | 0.003977 | NDUFAB1    | 0.023911 |
| SLC3A2     | 7.69E-06 | CYB561   | 0.003995 | UCHL5      | 0.023944 |
| NCOA2      | 7.81E-06 | SDF4     | 0.004006 | ISY1-RAB43 | 0.024011 |
| ZNF217     | 8.33E-06 | KCNN4    | 0.004006 | TNFRSF11B  | 0.024011 |
| ENTPD1     | 8.39E-06 | COPS7B   | 0.004009 | EFCAB11    | 0.024139 |
| TSPYL2     | 8.39E-06 | RPS3     | 0.004033 | MTMR12     | 0.024241 |
| HTATIP2    | 8.43E-06 | EHD4     | 0.004033 | MBTPS1     | 0.024241 |
| YIPF2      | 8.43E-06 | ARID5A   | 0.004037 | TRAPPC6B   | 0.024304 |
| TRIM16L    | 8.67E-06 | RPL8     | 0.004143 | ATP6V1F    | 0.024319 |
| PRDX4      | 8.67E-06 | CD99L2   | 0.004143 | BSG        | 0.024419 |
| AP002761,4 | 8.97E-06 | KIF14    | 0.004185 | FUT9       | 0.02447  |
| ATP1A1     | 9.18E-06 | TACC3    | 0.004188 | SRD5A3     | 0.024526 |
| PHACTR2    | 9.46E-06 | BRCA2    | 0.004188 | PDCD4      | 0.024526 |
| ULK1       | 1.01E-05 | LYPLA2   | 0.004203 | MXRA7      | 0.024526 |
| XPNPEP1    | 1.03E-05 | PRCC     | 0.004228 | KLHL2      | 0.024569 |
| PODXL      | 1.06E-05 | VLDLR    | 0.004228 | RPS21      | 0.024569 |
| PRNP       | 1.06E-05 | CYC1     | 0.004258 | TIA1       | 0.024603 |
| GNPDA1     | 1.12E-05 | PARVA    | 0.004276 | RNF113A    | 0.024649 |
| TMEM63B    | 1.12E-05 | MPZL2    | 0.004282 | SPC25      | 0.024716 |
| ADGRE5     | 1.12E-05 | VKORC1   | 0.004308 | AP1S1      | 0.024797 |
| PC         | 1.20E-05 | TFAP2A   | 0.004316 | SOD2_1     | 0.024812 |
| MRPL36     | 1.26E-05 | RIMS4    | 0.00433  | AC021078,1 | 0.024884 |
| RACK1      | 1.28E-05 | EI24     | 0.004341 | CLUHP3     | 0.024922 |

|          |          |          |          |          |          |
|----------|----------|----------|----------|----------|----------|
| EPHA2    | 1.45E-05 | KIF15    | 0.004395 | H2BC21   | 0.024948 |
| MEGF9    | 1.49E-05 | SLC30A1  | 0.004463 | TINCR    | 0.024948 |
| CHEK1    | 1.49E-05 | LGALS1   | 0.004463 | FOXP4    | 0.024975 |
| TUBG2    | 1.53E-05 | ANKH     | 0.004483 | POLR1D   | 0.024981 |
| TAF13    | 1.58E-05 | PHB      | 0.004493 | S100A16  | 0.025143 |
| NVL      | 1.61E-05 | CYP2R1   | 0.004501 | KDELR2   | 0.025143 |
| MYH14    | 1.64E-05 | RPL18    | 0.004518 | NDUFB7   | 0.025143 |
| MACC1    | 1.68E-05 | STK38L   | 0.004524 | DCP1B    | 0.02515  |
| SLC7A5   | 1.84E-05 | TLCD4    | 0.004551 | RSRC2    | 0.025171 |
| IRF9     | 1.88E-05 | NCAPG2   | 0.004554 | ITPKC    | 0.025171 |
| DDB2     | 1.89E-05 | SLC12A7  | 0.004576 | RNASEH2C | 0.025191 |
| RPL6     | 1.93E-05 | SLC17A5  | 0.00458  | HSD17B7  | 0.025319 |
| SKA3     | 1.96E-05 | STRAP    | 0.004611 | RUVBL2   | 0.025319 |
| IGSF8    | 2.01E-05 | CIP2A    | 0.004623 | MPV17    | 0.025374 |
| YPEL5    | 2.02E-05 | TATDN1   | 0.004623 | TACO1    | 0.025375 |
| LDLR     | 2.02E-05 | LMNB2    | 0.004623 | RPS16    | 0.025375 |
| CDC42EP1 | 2.02E-05 | CDCA2    | 0.004651 | C8orf76  | 0.025398 |
| UNG      | 2.05E-05 | AQP3     | 0.004652 | MINDY2   | 0.02555  |
| SKIL     | 2.20E-05 | CENPA    | 0.004657 | MAPK4    | 0.02555  |
| ZMYND19  | 2.31E-05 | PPP2CA   | 0.004657 | ADAM17   | 0.025666 |
| ZMIZ1    | 2.33E-05 | C1orf198 | 0.004722 | ATG101   | 0.025793 |
| IKBIP    | 2.34E-05 | ZP3      | 0.004722 | ZNF410   | 0.025793 |
| STON1    | 2.36E-05 | PLEKHA2  | 0.004722 | HDDC3    | 0.025824 |
| SHISA9   | 2.43E-05 | CBX1     | 0.004722 | CLU      | 0.025855 |
| TPI1     | 2.44E-05 | GNG5     | 0.004729 | ESCO2    | 0.025888 |
| SYTL1    | 2.46E-05 | MGST3    | 0.004729 | NGDN     | 0.025888 |
| MTFP1    | 2.46E-05 | GEN1     | 0.004735 | TMED10   | 0.025888 |
| DANCR    | 2.60E-05 | TMEM104  | 0.004745 | ARHGAP18 | 0.02594  |
| ID2      | 2.64E-05 | ILKAP    | 0.004768 | MCCC2    | 0.025951 |
| KLF10    | 2.71E-05 | TRIM38   | 0.004768 | IDH3A    | 0.025968 |
| SEC14L1  | 2.71E-05 | GLRX5    | 0.004777 | TMEM63C  | 0.026072 |
| EPHA4    | 2.81E-05 | MFSD12   | 0.004777 | FAM168B  | 0.026199 |
| STX3     | 2.85E-05 | RTCB     | 0.004794 | MBD3     | 0.026267 |
| KLC2     | 3.01E-05 | SP110    | 0.004823 | CAPZA2   | 0.026373 |
| DENND2C  | 3.01E-05 | GAB1     | 0.00483  | NIFK     | 0.026441 |
| MCM2     | 3.01E-05 | ASB6     | 0.00483  | FKBP5    | 0.026542 |
| MCMBP    | 3.14E-05 | PLD1     | 0.004833 | RNF34    | 0.026542 |
| RNF126   | 3.22E-05 | EBPL     | 0.004893 | NOD1     | 0.026677 |
| MLST8    | 3.26E-05 | TIMMDC1  | 0.004894 | ZNF639   | 0.02676  |
| GALK1    | 3.43E-05 | RPL30    | 0.004894 | FAM72B   | 0.02678  |
| KIAA2013 | 3.44E-05 | EDIL3    | 0.005018 | SCAMP3   | 0.02678  |
| PLOD2    | 3.74E-05 | BRD1     | 0.005018 | POLR3H   | 0.02678  |
| ILF3-DT  | 3.83E-05 | COPS7A   | 0.005031 | PDHA1    | 0.026827 |
| PGK1     | 3.99E-05 | PDE8A    | 0.005031 | KLHL25   | 0.026862 |
| PSEN2    | 4.11E-05 | PTOV1    | 0.005031 | SH2D5    | 0.027053 |
| COL5A1   | 4.11E-05 | WDR92    | 0.005072 | SLC25A20 | 0.027053 |
| DMPK     | 4.18E-05 | PCBP2    | 0.005075 | PSMG1    | 0.027053 |

|          |          |            |          |            |          |
|----------|----------|------------|----------|------------|----------|
| COA4     | 4.41E-05 | CENPI      | 0.005084 | FANCI      | 0.027082 |
| PLP2     | 4.41E-05 | SGTA       | 0.005095 | TGOLN2     | 0.027119 |
| ELL2     | 4.46E-05 | RPN1       | 0.005107 | FAM53B     | 0.02715  |
| KIAA1217 | 4.48E-05 | AKAP9      | 0.00511  | WDR46      | 0.027386 |
| ANGPTL4  | 4.54E-05 | LIN7A      | 0.00511  | PCLO       | 0.027399 |
| MIF      | 4.56E-05 | MLYCD      | 0.005125 | PPFIA3     | 0.02758  |
| BUB3     | 4.59E-05 | TMEM250    | 0.005138 | POLR3C     | 0.027606 |
| RAC3     | 4.60E-05 | RER1       | 0.005182 | EIF2S2     | 0.027661 |
| FAM174C  | 4.76E-05 | EEF1A1     | 0.005184 | GCSH       | 0.027692 |
| PPP1R26  | 4.79E-05 | GK         | 0.005184 | CROCCP2    | 0.027759 |
| PGPEP1   | 4.82E-05 | NEDD9      | 0.005184 | HDAC2      | 0.027798 |
| SEPTIN8  | 4.96E-05 | B4GALT2    | 0.005207 | PKIG       | 0.02791  |
| NME4     | 4.96E-05 | ZNHIT1     | 0.005213 | EIF2D      | 0.027922 |
| SERINC5  | 5.12E-05 | LIG1       | 0.005221 | AXIN1      | 0.027925 |
| CDCA3    | 5.17E-05 | COA6       | 0.005235 | MAP3K9     | 0.027959 |
| CIT      | 5.18E-05 | LSM7       | 0.005245 | NEIL3      | 0.028027 |
| FAM83B   | 5.20E-05 | KRT87P     | 0.00525  | SIMC1      | 0.028054 |
| E2F7     | 5.20E-05 | AC245060,4 | 0.005258 | AC080112,2 | 0.028064 |
| SYTL2    | 5.24E-05 | DDIAS      | 0.00526  | SNRPD2     | 0.028156 |
| CDCA5    | 5.82E-05 | MBIP       | 0.00526  | FKBP10     | 0.028209 |
| SNHG3    | 5.83E-05 | IKBKE      | 0.005279 | DXO        | 0.028281 |
| MDC1     | 6.03E-05 | SLC25A4    | 0.005279 | TGIF1      | 0.028281 |
| NPTN     | 6.03E-05 | NUDT4      | 0.005279 | ETFB       | 0.028281 |
| RBL1     | 6.03E-05 | SSU72      | 0.005316 | TARBP2     | 0.028479 |
| MIR34AHG | 6.11E-05 | C1orf43    | 0.005344 | CDR2       | 0.028481 |
| FAM3C2   | 6.39E-05 | COQ10B     | 0.005344 | HASPIN     | 0.028515 |
| KIF23    | 6.48E-05 | CLSPN      | 0.005347 | USP7       | 0.028643 |
| CYP1B1   | 6.72E-05 | RPL14      | 0.005347 | TRIR       | 0.028643 |
| SGCE     | 6.83E-05 | NCOA7      | 0.005347 | YARS2      | 0.028648 |
| FOXM1    | 6.83E-05 | TMEM64     | 0.005347 | MRPL33     | 0.028661 |
| SLC25A29 | 6.83E-05 | ZNF462     | 0.005347 | UBE2D2     | 0.028661 |
| RPS5     | 6.83E-05 | REPS1      | 0.005352 | ELF3       | 0.028685 |
| STX1A    | 7.14E-05 | RNF167     | 0.005352 | RBBP8NL    | 0.028721 |
| CDKN2B   | 7.38E-05 | FAM120AOS  | 0.005367 | SRPRB      | 0.028786 |
| RAB17    | 7.46E-05 | BOK        | 0.005368 | PKD2       | 0.028786 |
| ESPL1    | 7.46E-05 | S100A6     | 0.005383 | IRX4       | 0.028911 |
| PDIA3    | 7.46E-05 | CTU2       | 0.00539  | ZNF84      | 0.028911 |
| RPL23A   | 7.55E-05 | CHD1L      | 0.005486 | C17orf82   | 0.028989 |
| CLPTM1L  | 7.55E-05 | PDIA6      | 0.005494 | AC012321,1 | 0.029057 |
| HERC6    | 7.62E-05 | EPG5       | 0.0055   | FAM122C    | 0.029131 |
| TMEM189  | 7.62E-05 | COBLL1     | 0.005516 | CALCOCO1   | 0.029147 |
| ATF4     | 7.62E-05 | ATP10D     | 0.005557 | ZMYM4      | 0.029213 |
| MID1     | 7.63E-05 | CD151      | 0.005581 | NOMO1      | 0.02926  |
| DKK1     | 7.63E-05 | RPS19      | 0.005581 | TLE5       | 0.02926  |
| IFRD1    | 7.90E-05 | HERPUD1    | 0.005592 | VAV2       | 0.029347 |
| TOP2A    | 7.96E-05 | SMPD2      | 0.005598 | MACROD1    | 0.029347 |
| AMZ1     | 8.33E-05 | ZNF641     | 0.005635 | KIF20B     | 0.029355 |

|          |          |           |          |            |          |
|----------|----------|-----------|----------|------------|----------|
| RPS7     | 8.57E-05 | OSBPL9    | 0.005646 | LGALS3     | 0.029385 |
| TRIB3    | 8.57E-05 | TMCC1     | 0.005646 | CRKL       | 0.029385 |
| NCBP2AS2 | 8.61E-05 | PCOLCE2   | 0.005646 | ZNF860     | 0.029539 |
| MASTL    | 8.69E-05 | HYOU1     | 0.005646 | HAGH       | 0.029586 |
| VDAC2    | 8.69E-05 | PHKA1     | 0.005681 | BAIAP2-DT  | 0.029586 |
| DDA1     | 8.69E-05 | C19orf33  | 0.005699 | SPOCK1     | 0.029615 |
| KIF11    | 8.75E-05 | PRKCE     | 0.005748 | POLR3F     | 0.029659 |
| SDC3     | 8.79E-05 | EPS8L2    | 0.005748 | RFC5       | 0.02966  |
| MDM2     | 8.79E-05 | EIF2A     | 0.005751 | CHMP4B     | 0.029696 |
| STAMBPL1 | 8.92E-05 | THSD4     | 0.005751 | KLF6       | 0.029739 |
| PARP12   | 8.95E-05 | RPL37A    | 0.005754 | MICOS13    | 0.029796 |
| BHLHE41  | 9.02E-05 | PPP5C     | 0.005754 | PRPS1      | 0.029796 |
| RPL4     | 9.09E-05 | TRIM14    | 0.005759 | ECT2       | 0.029858 |
| C1QBP    | 9.09E-05 | FAM111A   | 0.005759 | CRAT       | 0.029873 |
| STAT1    | 9.19E-05 | NFATC1    | 0.005781 | LRRCC1     | 0.029886 |
| HSF1     | 9.19E-05 | BMPR2     | 0.005781 | NEMP2      | 0.030017 |
| MAP2K1   | 9.19E-05 | OSBPL10   | 0.005781 | ATP2A2     | 0.030044 |
| ATAD2    | 9.22E-05 | FUNDC2    | 0.005781 | MPP7       | 0.030061 |
| POF1B    | 9.22E-05 | AMOTL1    | 0.005844 | VAPA       | 0.030062 |
| ABLIM3   | 9.42E-05 | KLF13     | 0.005918 | TSPO       | 0.030091 |
| ID1      | 9.42E-05 | CTNNA1    | 0.005954 | AL135905,2 | 0.030151 |
| ELOVL6   | 9.46E-05 | WIPI1     | 0.006039 | HERC4      | 0.030158 |
| ANLN     | 9.72E-05 | CNTRL     | 0.00604  | SEMA3C     | 0.030171 |
| KIF18B   | 0.000102 | BIRC5     | 0.00604  | RPL3       | 0.030212 |
| PPFIA1   | 0.000103 | NUP50     | 0.00604  | TM2D3      | 0.030228 |
| GADD45A  | 0.000105 | PTPRJ     | 0.006083 | GLRX3      | 0.030268 |
| HAGHL    | 0.000105 | KIF2C     | 0.006159 | ZNF75D     | 0.030417 |
| POLR2E   | 0.000106 | REEP5     | 0.006159 | AL358472,6 | 0.030428 |
| BRCA1    | 0.000108 | PSAT1     | 0.006159 | CSNK1A1    | 0.030428 |
| PBX1     | 0.000109 | LHX1      | 0.006159 | NEK2       | 0.030585 |
| SLC6A9   | 0.000111 | TBL1X     | 0.006159 | GALNT2     | 0.030585 |
| SAMD9    | 0.000111 | SLC30A3   | 0.006167 | C4orf46    | 0.030585 |
| MYORG    | 0.000111 | IER5      | 0.006184 | WASHC2A    | 0.030585 |
| UGDH     | 0.000112 | SNHG8     | 0.00622  | LRP4       | 0.030585 |
| RDX      | 0.000112 | KIAA0895L | 0.00622  | SLC25A3    | 0.030585 |
| ALG5     | 0.000115 | UBE2L3    | 0.00622  | PRSS22     | 0.030585 |
| DNPH1    | 0.000117 | CASP8     | 0.006223 | RNF213     | 0.030585 |
| GTSE1    | 0.000117 | CMYA5     | 0.006223 | TBC1D31    | 0.03064  |
| SPINDOC  | 0.000117 | FOXN3     | 0.006241 | ST14       | 0.03064  |
| PARP14   | 0.000121 | CENPE     | 0.006259 | RSPH1      | 0.03064  |
| ORC1     | 0.000121 | SIRT1     | 0.006264 | RTL10      | 0.030652 |
| HTT      | 0.000122 | EPHB4     | 0.006269 | RPS20      | 0.030716 |
| GLTP     | 0.000122 | POLR2J3_2 | 0.006269 | CKAP2L     | 0.030728 |
| NCAPH    | 0.000122 | TGFB1     | 0.006269 | RFC4       | 0.030728 |
| LBHD1    | 0.000122 | RFWD3     | 0.006293 | ZNF430     | 0.030753 |
| RPN2     | 0.000125 | RPL5      | 0.006326 | RNF38      | 0.0308   |
| RPL27    | 0.000127 | ZNF704    | 0.006326 | RB1        | 0.03085  |

|           |          |          |          |            |          |
|-----------|----------|----------|----------|------------|----------|
| THAP11    | 0.000127 | PRKCH    | 0.0064   | KMT2A      | 0.030876 |
| HIP1      | 0.000128 | CHPF2    | 0.00642  | OSBPL11    | 0.030945 |
| ASPM      | 0.000129 | RAD51    | 0.006432 | YY1        | 0.030945 |
| FLVCR2    | 0.00013  | RTN4     | 0.006449 | FUCA2      | 0.031007 |
| TMEM150C  | 0.000138 | RPLP2    | 0.006451 | TMEM65     | 0.031007 |
| RPUSD1    | 0.000138 | ECHDC2   | 0.006459 | MACROH2A2  | 0.031007 |
| EIF3G     | 0.000138 | CBX3     | 0.0065   | MARS1      | 0.031007 |
| RPL18A    | 0.000139 | TRIM45   | 0.006579 | RTL6       | 0.031007 |
| UGT1A6    | 0.000143 | MRPS16   | 0.006579 | SLC39A8    | 0.031025 |
| MIR22HG   | 0.000144 | TSSC4    | 0.006579 | SRSF2      | 0.031097 |
| FARSA     | 0.000144 | TMEM120B | 0.006579 | COX5B      | 0.031143 |
| TNFRSF10B | 0.000146 | ZIC2     | 0.006579 | ARFGEF3    | 0.031323 |
| TTL       | 0.000149 | ISG20    | 0.006579 | MAP3K4     | 0.031346 |
| DCLRE1B   | 0.00015  | TMEM97   | 0.006579 | SYNCRIP    | 0.031437 |
| RPS4X     | 0.00015  | FBXL3    | 0.006594 | FBH1       | 0.031447 |
| EFEMP1    | 0.000151 | BLOC1S3  | 0.006603 | ALOXE3     | 0.031505 |
| JAGN1     | 0.000151 | ALMS1    | 0.006634 | LRRC8C     | 0.031514 |
| PAPSS2    | 0.000151 | RRM1     | 0.006637 | NDUFB9     | 0.031551 |
| BBC3      | 0.000153 | ZNF318   | 0.006648 | AL024508,1 | 0.03156  |
| MCM4      | 0.000155 | FAM3C    | 0.006649 | MID2       | 0.03156  |
| GLA       | 0.000155 | RBMS1    | 0.006657 | LRRFIP1    | 0.031758 |
| MICAL2    | 0.000157 | TMEM43   | 0.006657 | EML2       | 0.031759 |
| LIF       | 0.000158 | TMEM147  | 0.006657 | SLC12A5    | 0.031759 |
| CD81      | 0.00016  | SMC1A    | 0.006657 | MALL       | 0.031767 |
| RGS16     | 0.000161 | BLVRA    | 0.006676 | COPS6      | 0.031825 |
| MRPL10    | 0.000165 | CALR     | 0.006676 | RAB32      | 0.032012 |
| CKAP2     | 0.000173 | GINS1    | 0.006676 | EIF4E      | 0.032018 |
| UBE2E3    | 0.000177 | NEU1     | 0.006684 | PIGQ       | 0.03207  |
| BCL7B     | 0.00018  | SSR4     | 0.006684 | WAC-AS1    | 0.032078 |
| DDX60     | 0.000182 | DNAAF2   | 0.00675  | PFDN5      | 0.032217 |
| TOMM40    | 0.00019  | ASCC3    | 0.00679  | IFRD2      | 0.032219 |
| MCRIP2    | 0.000191 | OCIAD1   | 0.006799 | B3GNT10    | 0.032234 |
| NOMO2     | 0.000192 | MRPL38   | 0.006802 | ARID5B     | 0.032275 |
| MXD4      | 0.000194 | KIF24    | 0.006803 | AC010186,2 | 0.032291 |
| PLK1      | 0.000194 | UPP1     | 0.006807 | PIM3       | 0.032359 |
| RABGGTB   | 0.000198 | PITHD1   | 0.006818 | KDM7A      | 0.032366 |
| DPY19L1   | 0.000198 | ZXDB     | 0.006818 | SH3BP2     | 0.032472 |
| ELOF1     | 0.000198 | YBX1     | 0.006882 | UNC5B      | 0.032492 |
| FBXO22    | 0.000201 | CREBBP   | 0.006882 | PTGES2     | 0.03251  |
| TLE1      | 0.000206 | TTC38    | 0.006882 | PELO       | 0.032515 |
| TPRG1L    | 0.00021  | R3HDM4   | 0.006914 | CTDSP2     | 0.032515 |
| PCCB      | 0.00021  | PAM16    | 0.006946 | CKAP4      | 0.032565 |
| PPP2R2A   | 0.00021  | BLOC1S2  | 0.006947 | IVD        | 0.03257  |
| CAVIN1    | 0.00021  | KMT5B    | 0.006947 | CXADR      | 0.032652 |
| LINGO1    | 0.000211 | CIAO1    | 0.006974 | EZR        | 0.032709 |
| CCNF      | 0.000212 | PLA2G4F  | 0.006976 | ERAL1      | 0.032777 |
| CDIPT     | 0.000216 | ZNF761   | 0.006976 | RRNAD1     | 0.032808 |

|            |          |         |          |          |          |
|------------|----------|---------|----------|----------|----------|
| GPRC5A     | 0.00022  | SPG21   | 0.007018 | NFE2L1   | 0.032925 |
| TPMT       | 0.000224 | SMC4    | 0.007019 | ZFHX3    | 0.03299  |
| CDT1       | 0.000224 | ATP1B3  | 0.00702  | SLC35E3  | 0.033051 |
| SLC25A30   | 0.000226 | EXO1    | 0.007025 | TMOD1    | 0.033081 |
| EIF5       | 0.000226 | KLF12   | 0.007053 | LOXL1    | 0.033081 |
| BCAR1      | 0.000229 | MAN2C1  | 0.007059 | ADCY7    | 0.033081 |
| SRSF5      | 0.00023  | GAPDH   | 0.00708  | MPLKIP   | 0.033082 |
| RITA1      | 0.000232 | TRAPPC5 | 0.007093 | STN1     | 0.03315  |
| MAP4K3     | 0.000235 | MAPK13  | 0.007097 | RLF      | 0.033208 |
| GSN        | 0.000237 | USH1G   | 0.007127 | RAB8B    | 0.033222 |
| RPS8       | 0.000245 | GNL3LP1 | 0.007134 | NFKBIE   | 0.033247 |
| MRPS34     | 0.000254 | ASNS    | 0.007134 | ALKBH2   | 0.033475 |
| MKI67      | 0.000255 | EMC2    | 0.007134 | SNHG30   | 0.033503 |
| C5orf30    | 0.000255 | PREX1   | 0.007167 | LUC7L2   | 0.033537 |
| SH2B2      | 0.000255 | PRKAR1B | 0.0072   | GEMIN7   | 0.033548 |
| TSC22D1    | 0.000255 | MCRIP1  | 0.00721  | MICALL2  | 0.033563 |
| TLCD2      | 0.000255 | PAM     | 0.007216 | GPR157   | 0.033687 |
| DARS1      | 0.000257 | ARID1B  | 0.007223 | NHSL1    | 0.033687 |
| WSB2       | 0.000257 | MEX3B   | 0.007234 | BAZ1B    | 0.033687 |
| ALG2       | 0.000262 | ZNF185  | 0.007238 | PARP10   | 0.033687 |
| AC068888,1 | 0.000269 | JPT1    | 0.007346 | CHCHD6   | 0.033691 |
| PHGDH      | 0.000271 | LMNB1   | 0.007357 | PKN3     | 0.033756 |
| NCAPD2     | 0.000272 | TNIP2   | 0.007377 | HOMER3   | 0.033756 |
| TPBG       | 0.000275 | GABBR1  | 0.00738  | NSUN5    | 0.033836 |
| RPL19      | 0.000275 | PCDH1   | 0.007399 | CD55     | 0.033865 |
| MCM10      | 0.000278 | ULBP1   | 0.00744  | SFXN1    | 0.033895 |
| PCGF5      | 0.000278 | SNU13   | 0.007461 | SOX13    | 0.033943 |
| TGM1       | 0.000286 | RPL35A  | 0.007497 | NACA     | 0.033995 |
| ESAM       | 0.000287 | MCM7    | 0.007497 | PARP16   | 0.034197 |
| MAFK       | 0.000288 | CAV1    | 0.007497 | BPNT1    | 0.034412 |
| DTNA       | 0.000289 | TXNDC5  | 0.007552 | TMEM161A | 0.034412 |
| ZNF561     | 0.000293 | SLC19A2 | 0.007564 | SMDT1    | 0.034412 |
| EIF1       | 0.000296 | SIN3A   | 0.007564 | NPEPL1   | 0.034445 |
| MRPS11     | 0.000297 | YBX3    | 0.0076   | BCL3     | 0.034449 |
| ZNF629     | 0.000298 | MRRF    | 0.007624 | NIPA2    | 0.034522 |
| CASP8AP2   | 0.0003   | MPI     | 0.007629 | EZH2     | 0.034527 |
| PPP1R3B    | 0.000301 | PIH1D1  | 0.007653 | TLCD1    | 0.034551 |
| BLM        | 0.000304 | UBE2V1  | 0.007653 | MRPS26   | 0.034551 |
| EPPK1      | 0.000305 | TLN2    | 0.007655 | TIMP1    | 0.034551 |
| NUP35      | 0.000309 | FAM162A | 0.007727 | PROM2    | 0.034555 |
| COQ5       | 0.000312 | NR4A3   | 0.007738 | ACACB    | 0.034555 |
| RPL31      | 0.000316 | MAP2K2  | 0.007745 | COA3     | 0.034555 |
| ZNF48      | 0.000317 | DYNLRB1 | 0.007771 | MRPL9    | 0.03469  |
| RPL10      | 0.000323 | RPS25   | 0.007947 | PSMD14   | 0.03469  |
| NCAPG      | 0.000327 | ILF3    | 0.007947 | TBX2     | 0.03469  |
| PKP1       | 0.000333 | NDUFS8  | 0.007981 | PRKX     | 0.03469  |
| RHOD       | 0.000334 | ACBD6   | 0.007988 | CDC25B   | 0.034718 |



|          |          |             |          |            |          |
|----------|----------|-------------|----------|------------|----------|
| NATD1    | 0.000336 | MINPP1      | 0.007988 | PIDD1      | 0.034742 |
| PLOD3    | 0.000339 | PISD        | 0.007991 | C5orf22    | 0.034831 |
| RPS13    | 0.000344 | RNF144B     | 0.008047 | NSUN3      | 0.034849 |
| PNMA1    | 0.000344 | NPAS2       | 0.008054 | RNF216     | 0.034881 |
| HJURP    | 0.000346 | DNAJB11     | 0.008061 | PNPLA8     | 0.034881 |
| CALU     | 0.000352 | OGDH        | 0.008073 | TMEM109    | 0.034881 |
| ZSWIM7   | 0.000352 | CCSAP       | 0.008077 | ANKLE2     | 0.034894 |
| BCOR     | 0.000352 | VEGFA       | 0.008077 | WDR48      | 0.034898 |
| C18orf54 | 0.000352 | RFC3        | 0.008099 | EMG1       | 0.034898 |
| CIART    | 0.000353 | PQBP1       | 0.008099 | THOC5      | 0.034898 |
| GAN      | 0.000354 | SCFD2       | 0.008121 | HUNK       | 0.035171 |
| AHCY     | 0.000362 | WASHC2C     | 0.008159 | SLF1       | 0.035179 |
| EIF3H    | 0.000374 | HK2         | 0.008178 | DEDD       | 0.035216 |
| MMS22L   | 0.000378 | NR1D2       | 0.008178 | CNOT8      | 0.035216 |
| TMED2    | 0.000378 | STK25       | 0.008212 | RAB4A      | 0.03523  |
| PRMT6    | 0.000379 | LINC01106   | 0.008256 | SLC1A4     | 0.03523  |
| PIK3R2   | 0.000379 | PRR19       | 0.008256 | RSL24D1    | 0.035284 |
| WWC1     | 0.000382 | ATP8B1      | 0.008267 | ZNF630     | 0.035325 |
| CIAO2B   | 0.000382 | SMC3        | 0.008268 | PRLR       | 0.035424 |
| SNX17    | 0.000382 | ABT1        | 0.008344 | RPP25      | 0.035424 |
| B3GAT3   | 0.000384 | PARP8       | 0.008364 | SLC5A6     | 0.035488 |
| RBM18    | 0.000385 | FBXO25      | 0.008381 | ENTPD7     | 0.035488 |
| AIF1L    | 0.000386 | ATG4A       | 0.008433 | NIN        | 0.035488 |
| NCLN     | 0.000396 | CNOT6       | 0.008448 | PJA1       | 0.035488 |
| IFI30    | 0.0004   | NOL6        | 0.008505 | JKAMP      | 0.035514 |
| PDXK     | 0.0004   | ACY1        | 0.00853  | KLF16      | 0.035514 |
| LANCL1   | 0.0004   | FEN1        | 0.008565 | TP53INP2   | 0.035514 |
| ATAD3B   | 0.000406 | CCNH        | 0.008749 | FCF1       | 0.035638 |
| OAF      | 0.000406 | UGP2        | 0.008783 | PUS3       | 0.035802 |
| CABLES1  | 0.000409 | SLC35B2     | 0.008783 | DDT        | 0.035859 |
| MGST1    | 0.000414 | AURKB       | 0.008794 | GALNT7     | 0.035863 |
| DUSP5    | 0.000417 | DEK         | 0.00882  | PRKAB2     | 0.035878 |
| MGAT1    | 0.000419 | CNOT6L      | 0.008876 | ISOC1      | 0.035886 |
| ILVBL    | 0.000424 | VANGL1      | 0.008889 | CENPJ      | 0.035957 |
| CCDC85B  | 0.000432 | RPS15       | 0.008911 | ALDOA      | 0.035957 |
| MYO6     | 0.000439 | CDK5RAP2    | 0.008929 | RIBC2      | 0.036011 |
| RRM2B    | 0.000439 | TONSL       | 0.008936 | PTPMT1     | 0.036047 |
| BARD1    | 0.000441 | AACS        | 0.008936 | AC139099,1 | 0.036047 |
| FURIN    | 0.000442 | UBE2G2      | 0.008936 | FGD5-AS1   | 0.036048 |
| EYA2     | 0.000442 | AC239868,1  | 0.008991 | MTERF2     | 0.036048 |
| CCP110   | 0.000449 | ARHGAP11B_2 | 0.008991 | CDK1       | 0.036051 |
| MRPS30   | 0.000449 | AAAS        | 0.008996 | ZNF362     | 0.036106 |
| SMAGP    | 0.000449 | CDCA8       | 0.009019 | METTTL23   | 0.036106 |
| EEF1G    | 0.000452 | CLK3        | 0.009199 | C7orf26    | 0.036152 |
| RAD18    | 0.000457 | RPL21       | 0.00924  | LAMP1      | 0.036158 |
| GABRP    | 0.000457 | WWC3        | 0.009317 | RECQL4     | 0.036203 |
| TTK      | 0.000457 | MYH10       | 0.009317 | LAMC2      | 0.036224 |

|            |          |            |          |            |          |
|------------|----------|------------|----------|------------|----------|
| SGPL1      | 0.000457 | GPSM2      | 0.009321 | LRRC41     | 0.036243 |
| LONRF3     | 0.000457 | ALG10B     | 0.009321 | RUSC1      | 0.036326 |
| TRIM24     | 0.00046  | ARHGAP11A  | 0.009321 | AMPD2      | 0.03635  |
| AHNAK2     | 0.00046  | TAF1C      | 0.009321 | FXR2       | 0.03635  |
| BUB1       | 0.000467 | KCNK5      | 0.009383 | YLP1M1     | 0.036451 |
| MEAK7      | 0.000467 | PGM2L1     | 0.009383 | POLR2F     | 0.036462 |
| TMED4      | 0.000468 | B4GALT7    | 0.009389 | TRIM62     | 0.036498 |
| RRAS2      | 0.000469 | SELENOF    | 0.009447 | UBE2Q1     | 0.036498 |
| TICRR      | 0.000473 | MTND2P28   | 0.009455 | GAS5       | 0.036498 |
| NTPCR      | 0.000474 | ENTPD1-AS1 | 0.009524 | CLPP       | 0.036498 |
| GAS2L3     | 0.000492 | B3GALT6    | 0.009569 | PCED1A     | 0.03651  |
| RPL27A     | 0.000511 | FAM111B    | 0.009569 | RABAC1     | 0.036521 |
| SF3B2      | 0.000522 | WDHD1      | 0.009582 | PARM1      | 0.036541 |
| RPS28      | 0.000526 | RPS29      | 0.009635 | AL365181,3 | 0.036577 |
| KIF26A     | 0.000529 | STX7       | 0.009645 | RRM2       | 0.036577 |
| QKI        | 0.000538 | E2F1       | 0.009645 | TET3       | 0.036577 |
| RBM12B     | 0.000538 | S100A4     | 0.009707 | MAF1       | 0.036577 |
| HNRNPF     | 0.000543 | ARF1       | 0.009793 | FJX1       | 0.036577 |
| RNF19B     | 0.000544 | SLC12A8    | 0.009795 | ZNF106     | 0.036577 |
| RAB31L1    | 0.000561 | AC008966,1 | 0.009806 | CISD3      | 0.036577 |
| GPRC5C     | 0.000561 | LAMTOR5    | 0.009851 | DUS3L      | 0.036577 |
| AC243919,1 | 0.000562 | COPS3      | 0.009851 | CDH24      | 0.036592 |
| KLHL24     | 0.000581 | RPS23      | 0.009865 | SERAC1     | 0.036681 |
| PRIM2      | 0.000581 | ATG4D      | 0.009883 | LRP5       | 0.036769 |
| RPL13      | 0.000586 | PRC1       | 0.009886 | ACTR1B     | 0.036779 |
| SLC25A6    | 0.000586 | RCN1       | 0.009959 | NR1D1      | 0.036816 |
| RIOK1      | 0.000588 | MOAP1      | 0.010019 | CKAP5      | 0.036824 |
| TP53I11    | 0.000596 | PMPCA      | 0.01004  | UNC13D     | 0.036838 |
| LAPTM4B    | 0.000597 | NEPRO      | 0.010103 | F12        | 0.036843 |
| SLC38A1    | 0.000597 | MAPK9      | 0.010103 | FBXW5      | 0.036923 |
| ANK3       | 0.000601 | DHRS2      | 0.010103 | FBXO45     | 0.036938 |
| ITPR2      | 0.000601 | GABPB1     | 0.010111 | SLC25A40   | 0.03694  |
| EEF1D      | 0.000602 | FES        | 0.010116 | UBE2H      | 0.03694  |
| RTKN2      | 0.000602 | C5orf38    | 0.010171 | SLC9A6     | 0.03694  |
| RAB12      | 0.000604 | EMP2       | 0.010171 | IMPDH2     | 0.036964 |
| NHP2       | 0.000604 | TK1        | 0.010178 | VSIG10L    | 0.036964 |
| SLC9A3R2   | 0.000609 | RPL13A     | 0.010196 | SLC2A11    | 0.036964 |
| RPL39      | 0.000609 | RPS27A     | 0.010239 | GDI1       | 0.036964 |
| KIFC1      | 0.000627 | PDE4DIP    | 0.010241 | SURF4      | 0.037166 |
| UXS1       | 0.000633 | OPN3       | 0.010253 | TRIM21     | 0.037174 |
| IMMP2L     | 0.000634 | MTX2       | 0.010256 | MAPK8IP1   | 0.037174 |
| DES11      | 0.000637 | RRAGD      | 0.01027  | DOCK7      | 0.037218 |
| CGREF1     | 0.000638 | RRP36      | 0.010271 | EXOSC4     | 0.037354 |
| PRR11      | 0.000638 | SH2D3A     | 0.010271 | AGTRAP     | 0.037379 |
| PTRH1      | 0.000641 | DIAPH1     | 0.010298 | FADD       | 0.037395 |
| NQO1       | 0.000648 | ANAPC10    | 0.010375 | CA11       | 0.037395 |
| ATP5F1B    | 0.000657 | SRGAP2C    | 0.01038  | POLR1C     | 0.037439 |

|            |          |          |          |            |          |
|------------|----------|----------|----------|------------|----------|
| PIIP5K1    | 0.000657 | EOMES    | 0.01038  | DDIT4      | 0.037439 |
| KCTD13     | 0.000657 | ANAPC16  | 0.010397 | TMEM134    | 0.037439 |
| DLC1       | 0.000661 | SYDE2    | 0.010409 | RPL28      | 0.037489 |
| PBK        | 0.000662 | QSOX1    | 0.010409 | BBIP1      | 0.037581 |
| ARHGAP12   | 0.000669 | ADCY6    | 0.010459 | COX7B      | 0.037581 |
| BLCAP      | 0.000672 | ZNF714   | 0.010476 | RBBP5      | 0.037594 |
| ZNF219     | 0.000673 | RPL11    | 0.010518 | TGFBR2     | 0.037594 |
| CENPO      | 0.000676 | DHRS13   | 0.01052  | RNFT2      | 0.037594 |
| RNPS1      | 0.000678 | ZNF100   | 0.01052  | PALB2      | 0.037594 |
| FSTL3      | 0.000678 | CAPN2    | 0.010527 | TUBB3      | 0.037594 |
| KIAA0930   | 0.000685 | RAB10    | 0.010527 | ARHGAP19   | 0.037793 |
| AC004943,2 | 0.000685 | ANXA4    | 0.010527 | PPP6R2     | 0.037834 |
| DHTKD1     | 0.000689 | EMC3     | 0.010527 | APOOL      | 0.03784  |
| QTRT1      | 0.000689 | PACSIN2  | 0.010527 | MRPL4      | 0.037997 |
| TARS2      | 0.00069  | PIK3C2B  | 0.010551 | RGL2       | 0.038084 |
| GLB1L2     | 0.00069  | MSH2     | 0.010584 | CSNK1D     | 0.038084 |
| RASGRP1    | 0.00069  | UQCC3    | 0.010584 | ADA        | 0.038084 |
| RPL26      | 0.00069  | NEMP1    | 0.010584 | AASDHPPT   | 0.038259 |
| PON2       | 0.000696 | PPP2R5D  | 0.010589 | PLD2       | 0.038259 |
| CREB3L2    | 0.000696 | SH3PXD2A | 0.010604 | EIF6       | 0.038284 |
| PHF19      | 0.000711 | LUC7L3   | 0.010657 | TRMT61B    | 0.038384 |
| MANBA      | 0.00072  | NR3C1    | 0.010688 | ATAD5      | 0.038397 |
| EPCAM      | 0.000722 | PLA2G12A | 0.0107   | MAX        | 0.038417 |
| MBNL3      | 0.000722 | DSTYK    | 0.010806 | CRLF1      | 0.038433 |
| RERG       | 0.000737 | PVR      | 0.010806 | SLC35F2    | 0.038449 |
| ADSL       | 0.000747 | ZNF213   | 0.010825 | RTTN       | 0.03849  |
| ANTKMT     | 0.000751 | POLA2    | 0.010827 | BRI3       | 0.038658 |
| NTN1       | 0.000756 | H2AW     | 0.010898 | JAK1       | 0.03879  |
| RACGAP1    | 0.000756 | SF3A1    | 0.010995 | WDTC1      | 0.038935 |
| IFNGR2     | 0.000764 | MRPL1    | 0.011003 | TMEM70     | 0.038935 |
| SGO1       | 0.000787 | CARD10   | 0.011003 | GSTK1      | 0.038952 |
| RPLP0      | 0.000788 | PEMT     | 0.01101  | AL118506,1 | 0.038959 |
| CHAF1A     | 0.000788 | RPRD2    | 0.011017 | MAP3K5     | 0.038979 |
| ZFAND1     | 0.000794 | PPM1F    | 0.011193 | SMPD1      | 0.038979 |
| DMAC1      | 0.000798 | GPR160   | 0.01122  | MNX1-AS1   | 0.03899  |
| S100A11    | 0.0008   | B4GALNT4 | 0.011265 | ADK        | 0.039104 |
| KAT7       | 0.000804 | RPL10A   | 0.011266 | CTBP2      | 0.039113 |
| PKP3       | 0.000808 | KDM6B    | 0.011279 | C20orf27   | 0.039201 |
| MTG1       | 0.00081  | SLC2A6   | 0.011285 | TAP2       | 0.039268 |
| ATP6V1D    | 0.00081  | ZNF395   | 0.011358 | ESD        | 0.039268 |
| CDK2       | 0.000824 | RAD21    | 0.011388 | NT5DC2     | 0.039366 |
| SRGAP2     | 0.000824 | MMS19    | 0.011434 | RIPK1      | 0.039431 |
| PPP1R14B   | 0.000824 | TIAL1    | 0.011478 | RTL8A      | 0.039431 |
| REV3L      | 0.000837 | RPL23    | 0.01149  | C4orf3     | 0.039506 |
| IPPK       | 0.000837 | PEBP1    | 0.0115   | TMEM209    | 0.039511 |
| RPL32      | 0.000849 | NME2     | 0.01153  | TOMM20     | 0.039534 |
| GALNT6     | 0.000852 | ZPR1     | 0.011539 | BAZ2B      | 0.039628 |

|            |          |            |          |            |          |
|------------|----------|------------|----------|------------|----------|
| FREM2      | 0.000852 | GSPT1      | 0.011543 | HOOK3      | 0.039628 |
| IGSF3      | 0.000863 | FAT4       | 0.011547 | DYNLL2     | 0.039629 |
| PRDX3      | 0.000869 | NPAT       | 0.011547 | AK3        | 0.039661 |
| H3C10      | 0.000869 | RBM39      | 0.011547 | TP53BP1    | 0.039671 |
| RAD23A     | 0.000873 | ITGB4      | 0.01155  | SLC25A32   | 0.039695 |
| CHCHD10    | 0.000873 | POMGNT1    | 0.011591 | RNF208     | 0.039764 |
| LASP1      | 0.000876 | NAXE       | 0.011605 | ARHGEF2    | 0.039788 |
| RPS11      | 0.000876 | ZNF286A    | 0.011653 | ZNF672     | 0.039936 |
| CD320      | 0.000882 | MTIF2      | 0.011663 | WDR97      | 0.039936 |
| N4BP2      | 0.000884 | AP003108,2 | 0.011683 | DMTN       | 0.039985 |
| PPIB       | 0.000889 | PTPRG-AS1  | 0.011689 | NCSTN      | 0.040082 |
| SMC2       | 0.000892 | TMEM223    | 0.01172  | TROAP      | 0.040082 |
| PRIM1      | 0.000902 | NDUFAF8    | 0.011752 | ADGRF4     | 0.040208 |
| ITGA3      | 0.00091  | GRINA      | 0.011836 | PHC1P1     | 0.040208 |
| CDH3       | 0.000915 | TRABD      | 0.011842 | NIT2       | 0.040211 |
| DTL        | 0.000933 | LRRC61     | 0.011921 | EIF3L      | 0.040211 |
| RCC1       | 0.000937 | OSER1      | 0.011921 | NKAP       | 0.040211 |
| CMIP       | 0.000941 | PLCB3      | 0.01196  | CCNK       | 0.040221 |
| TJP1       | 0.000945 | PTPN14     | 0.012021 | RPL12      | 0.04027  |
| WARS1      | 0.000955 | LHX1-DT    | 0.012021 | LRRC15     | 0.040313 |
| LINC00294  | 0.000957 | DGKZ       | 0.012065 | BUD23      | 0.040394 |
| F8A1       | 0.000957 | ZNF335     | 0.012081 | UBE2V2     | 0.040394 |
| ISYNA1     | 0.000961 | SIK2       | 0.012173 | FBRSL1     | 0.040394 |
| ATP6V1E1   | 0.000962 | TANC2      | 0.012197 | TERF2IP    | 0.040394 |
| G2E3       | 0.000963 | ASF1B      | 0.012197 | ACSF3      | 0.040394 |
| IGSF9      | 0.000968 | LIN54      | 0.012276 | YJU2       | 0.040394 |
| SYNE2      | 0.000968 | ORAI1      | 0.012286 | NDUFA13    | 0.040394 |
| HMMR       | 0.000977 | DHODH      | 0.012286 | CAPNS1     | 0.040394 |
| SLC9A3-AS1 | 0.000977 | SIDT1      | 0.012373 | HDHD5      | 0.040394 |
| OSGIN1     | 0.000989 | SCAND2P    | 0.012373 | GPRC5D-AS1 | 0.040432 |
| SAP130     | 0.000994 | INO80B     | 0.012402 | TMC5       | 0.040466 |
| RPS10      | 0.001001 | FANCE      | 0.012402 | BCLAF1     | 0.040533 |
| RAD54L     | 0.001011 | MOV10      | 0.012445 | CTCF       | 0.040533 |
| TRGC1      | 0.001024 | RBMXL1     | 0.012629 | PARP2      | 0.040533 |
| PREB       | 0.001026 | NPDC1      | 0.012755 | TIMM17A    | 0.04061  |
| UHRF1      | 0.001028 | NFKB1      | 0.012822 | QPRT       | 0.040651 |
| DLGAP5     | 0.001028 | DOP1B      | 0.012822 | ANKRD10    | 0.040788 |
| KCTD20     | 0.001031 | CDKN1B     | 0.01303  | SEC61G     | 0.040905 |
| UROD       | 0.001036 | TMED1      | 0.013053 | PLEKHH1    | 0.041103 |
| DUSP23     | 0.001046 | ACTG1      | 0.013077 | BRIX1      | 0.041116 |
| MICA       | 0.001046 | TSEN2      | 0.013175 | SNHG6      | 0.041143 |
| MEST       | 0.001046 | DIMT1      | 0.013175 | C15orf61   | 0.041154 |
| HSP90B1    | 0.001046 | DNMT3A     | 0.013271 | UBE2J2     | 0.04121  |
| KTN1       | 0.001046 | TMEM139    | 0.013271 | SON        | 0.04127  |
| DNAJB6     | 0.00105  | DNMT3B     | 0.013271 | NPC2       | 0.041271 |
| C1orf122   | 0.001068 | NBPF1      | 0.013313 | VPS45      | 0.041316 |
| P4HA1      | 0.001068 | SESTD1     | 0.013313 | MRPS2      | 0.041316 |

|            |          |         |          |            |          |
|------------|----------|---------|----------|------------|----------|
| TMX2       | 0.001068 | JTB     | 0.013315 | CEMIP2     | 0.04142  |
| MICALL1    | 0.001073 | LIN52   | 0.013341 | CLTB       | 0.04145  |
| RIMS3      | 0.001078 | UBE2S   | 0.013357 | LGMN       | 0.041522 |
| BMP1       | 0.00108  | H2BC18  | 0.013416 | FAM92A     | 0.041617 |
| SORBS3     | 0.00108  | EIF5A   | 0.013543 | HSPG2      | 0.041681 |
| PLK3       | 0.001086 | PARD6G  | 0.013558 | INHBB      | 0.041681 |
| BUB1B      | 0.001093 | KDF1    | 0.013561 | CNPPD1     | 0.041681 |
| TRIM56     | 0.001098 | IFITM3  | 0.013561 | NOP16      | 0.041681 |
| LRSAM1     | 0.001098 | MYH9    | 0.013588 | RDH11      | 0.041681 |
| SP1        | 0.001113 | PPL     | 0.013624 | WDR61      | 0.041681 |
| JMJD6      | 0.001113 | SCX     | 0.013703 | PLOD1      | 0.041683 |
| PHLPP1     | 0.001113 | SKA1    | 0.013727 | ODC1       | 0.041809 |
| ITPA       | 0.001113 | MPST    | 0.01381  | CENPT      | 0.041916 |
| MRPS6      | 0.001113 | GFM1    | 0.01382  | AKNA       | 0.042044 |
| RPL36A     | 0.00112  | SMPDL3B | 0.013853 | WRNIP1     | 0.042047 |
| NRP1       | 0.001123 | C1D     | 0.013862 | FLNA       | 0.042205 |
| TBC1D9     | 0.001128 | PTK6    | 0.013879 | NEU3       | 0.04221  |
| SF3B5      | 0.001128 | SLC7A11 | 0.013955 | SEC11A     | 0.04221  |
| PRPF39     | 0.001128 | TMED9   | 0.013955 | RRP1       | 0.042257 |
| LINC02732  | 0.001134 | ACTR5   | 0.013966 | AFAP1L2    | 0.042308 |
| RPS17      | 0.001138 | SRSF8   | 0.013988 | AC004264,1 | 0.042368 |
| LINC00365  | 0.001148 | RAI1    | 0.013989 | ZFP90      | 0.042397 |
| CDK18      | 0.001156 | PIM1    | 0.013995 | ZNF480     | 0.042397 |
| HS6ST1     | 0.001156 | SEPHS2  | 0.013995 | CTNND2     | 0.042413 |
| MYDGF      | 0.001161 | SERP1   | 0.014125 | DHFR       | 0.042413 |
| UBTF       | 0.001165 | TGS1    | 0.014133 | FANCG      | 0.042413 |
| RPL7       | 0.001169 | COIL    | 0.014168 | AC010168,2 | 0.042577 |
| DDX49      | 0.001175 | KLF7    | 0.014187 | CNP        | 0.042607 |
| JPH2       | 0.001175 | GHITM   | 0.014191 | ELMO3      | 0.042634 |
| MORC4      | 0.001175 | NDUFAF4 | 0.014232 | MRPS24     | 0.042708 |
| GOLGB1     | 0.001176 | TMEM86A | 0.014269 | BOP1       | 0.042708 |
| SLC25A24   | 0.001179 | FHOD1   | 0.014318 | DIPK1A     | 0.042796 |
| PLRG1      | 0.001198 | LRCH4   | 0.014377 | ZBTB8A     | 0.042825 |
| CTXN1      | 0.001202 | DUSP16  | 0.014398 | CDC25C     | 0.042826 |
| RPS6       | 0.001206 | WDR90   | 0.014448 | CAB39L     | 0.043021 |
| METRNL     | 0.001206 | NUDC    | 0.014454 | ACSL1      | 0.043127 |
| SMURF1     | 0.001207 | FAM210B | 0.014547 | SGF29      | 0.043251 |
| TSPAN13    | 0.001224 | DNAJC9  | 0.014562 | PEX16      | 0.043337 |
| PITX1      | 0.001228 | YARS1   | 0.014572 | BTF3       | 0.043337 |
| ZNF444     | 0.001241 | TFPI    | 0.014572 | MOB2       | 0.043337 |
| ZDHHC24    | 0.00126  | SRM     | 0.014617 | FADS3      | 0.043337 |
| ZIC5       | 0.00126  | EML5    | 0.014728 | NME7       | 0.043498 |
| MCM5       | 0.001269 | KIF4A   | 0.014794 | EIF3M      | 0.043581 |
| APLP2      | 0.001271 | NOL3    | 0.014841 | SRP14      | 0.043581 |
| PAXIP1-AS1 | 0.001275 | BRPF3   | 0.014909 | LRRC37B    | 0.043602 |
| AMOTL2     | 0.001277 | PALM3   | 0.014917 | TBC1D8B    | 0.043678 |
| AL732372,1 | 0.001279 | COL18A1 | 0.014922 | DBF4       | 0.043854 |

|          |          |            |          |              |          |
|----------|----------|------------|----------|--------------|----------|
| DNMT1    | 0.001279 | CDC45      | 0.014996 | AC092718,3   | 0.043871 |
| SLC12A6  | 0.001285 | SEMA3F     | 0.015026 | GPRIN1       | 0.043956 |
| NOB1     | 0.001288 | SLC7A2     | 0.015082 | ZNHIT2       | 0.044056 |
| RPS15A   | 0.001298 | RPL35      | 0.015088 | MRC2         | 0.044056 |
| UROS     | 0.001299 | IKZF4      | 0.015088 | ARL6IP4      | 0.044098 |
| HMOX1    | 0.001299 | SYNGR2     | 0.01516  | NECTIN1      | 0.044248 |
| SEC62    | 0.0013   | EIF3F      | 0.015178 | VPS28        | 0.044405 |
| FANCA    | 0.001301 | PHLDB2     | 0.015228 | CD99         | 0.044433 |
| LBR      | 0.001302 | RND1       | 0.015228 | ATP2A3       | 0.044481 |
| ERLIN1   | 0.00131  | POGLUT3    | 0.015233 | ZNF473       | 0.044481 |
| ENTPD5   | 0.00131  | SRGAP2B    | 0.01533  | CFAP410      | 0.044481 |
| NECAB3   | 0.001311 | KHK        | 0.015342 | CLPB         | 0.04454  |
| ZBTB21   | 0.001351 | FAM72A     | 0.015361 | MAP3K10      | 0.04454  |
| NNT      | 0.001354 | SNX29      | 0.015361 | PFDN4        | 0.04454  |
| TSPYL1   | 0.001361 | FOXRED2    | 0.015361 | DIDO1        | 0.04454  |
| RHPN1    | 0.001367 | DEF8       | 0.015411 | ARHGEF26     | 0.044573 |
| TTC19    | 0.001368 | AC012615,1 | 0.015419 | PCDHGB5      | 0.044573 |
| NSD2     | 0.001377 | CD47       | 0.015452 | H1-0         | 0.044599 |
| SARS1    | 0.001396 | TTI1       | 0.015452 | RESF1        | 0.044791 |
| LPCAT1   | 0.001396 | TCEA1      | 0.015465 | PPP1R10      | 0.044926 |
| SFMBT2   | 0.001408 | TMEM161B   | 0.015478 | ACAP3        | 0.045093 |
| TMEM205  | 0.001408 | SMG6       | 0.015478 | TRMT12       | 0.04522  |
| PSTPIP2  | 0.001412 | SCN8A      | 0.015585 | FAM47E-STBD1 | 0.045237 |
| CDR2L    | 0.001412 | PRAF2      | 0.015657 | GLI3         | 0.045237 |
| TRUB2    | 0.001426 | CCNB1      | 0.015668 | LUC7L        | 0.045237 |
| GPAM     | 0.001426 | DUS1L      | 0.015668 | AC009163,7   | 0.045237 |
| FAM234B  | 0.001426 | UQCR11     | 0.015679 | EGLN1        | 0.045465 |
| ZDHHC23  | 0.00146  | PROCR      | 0.0157   | HIGD2A       | 0.045522 |
| TUBA1C   | 0.001466 | ZFP62      | 0.015756 | COX4I1       | 0.045522 |
| MRPS25   | 0.001476 | MLPH       | 0.015789 | PAX9         | 0.045541 |
| TMEM259  | 0.001486 | SNX12      | 0.015796 | CUEDC2       | 0.045585 |
| GALE     | 0.001507 | LACC1      | 0.015807 | COMTD1       | 0.045591 |
| ANKRD50  | 0.001511 | C6orf120   | 0.01582  | GMNN         | 0.045594 |
| EPS8     | 0.001517 | RASD1      | 0.01582  | TUSC2        | 0.045779 |
| EIF2B2   | 0.001524 | GABPB1-IT1 | 0.01582  | VAMP1        | 0.04578  |
| FAM207A  | 0.001524 | AVPI1      | 0.015842 | SMCHD1       | 0.04578  |
| BCL2L11  | 0.001531 | SLC25A38   | 0.015872 | PRRG4        | 0.045926 |
| ACBD7    | 0.001531 | QPCTL      | 0.015889 | CCT4         | 0.046104 |
| GTPBP10  | 0.001533 | DNAJC22    | 0.015922 | POP7         | 0.046125 |
| GIN52    | 0.00154  | PCMTD2     | 0.015922 | IFITM1       | 0.046125 |
| ZDHHC14  | 0.001543 | TMUB1      | 0.015922 | CDC34        | 0.046153 |
| HEXB     | 0.001544 | LINC01123  | 0.015923 | ISOC2        | 0.04621  |
| PTDSS2   | 0.001544 | ERI2       | 0.015986 | DNAJB1       | 0.046213 |
| AP1S3    | 0.001546 | CTTN       | 0.015993 | PSPH         | 0.046246 |
| TOP2B    | 0.001546 | ATG16L1    | 0.016006 | MSL2         | 0.046292 |
| STIP1    | 0.001546 | CNBP       | 0.016006 | UBA7         | 0.046314 |
| KTN1-AS1 | 0.001562 | ITPK1      | 0.016006 | NDUFV3       | 0.046396 |

|             |          |         |          |            |          |
|-------------|----------|---------|----------|------------|----------|
| RPS9        | 0.001564 | TIMM44  | 0.016006 | SP100      | 0.046644 |
| SFT2D1      | 0.001581 | NAP1L1  | 0.016008 | FAM13B     | 0.046644 |
| RPS24       | 0.001581 | STUB1   | 0.016008 | CDC42BPG   | 0.046644 |
| HOMER2      | 0.001581 | RASSF8  | 0.016124 | RRAGB      | 0.046644 |
| SMTN        | 0.001587 | EMC7    | 0.016124 | UGCG       | 0.046817 |
| FBXO17      | 0.001595 | EMC10   | 0.016214 | MRE11      | 0.046817 |
| URM1        | 0.001597 | DCAF4   | 0.016216 | TMEM99     | 0.046817 |
| EMC8        | 0.001604 | TRIP4   | 0.01622  | DNAJC5     | 0.046817 |
| TMPRSS13    | 0.001605 | PNRC1   | 0.01626  | TBX3       | 0.046822 |
| HOOK2       | 0.001606 | NGLY1   | 0.016275 | ETFA       | 0.046852 |
| UBE2D3      | 0.001613 | RHOU    | 0.016309 | LMX1B      | 0.046868 |
| PRKAR2B     | 0.001617 | MYO9B   | 0.016309 | KNTC1      | 0.046868 |
| LYPD6B      | 0.001637 | ZBTB38  | 0.016315 | TSR3       | 0.046868 |
| ASTN2       | 0.001637 | FHL2    | 0.016348 | PSIP1      | 0.046917 |
| APMAP       | 0.001662 | PLK2    | 0.016348 | ZNRD2      | 0.046921 |
| RPL7A       | 0.001663 | TEX264  | 0.016387 | FAU        | 0.046964 |
| THUMPD3-AS1 | 0.001665 | SCRN2   | 0.016534 | ZNF837     | 0.046982 |
| PGAM1       | 0.001665 | FAM221A | 0.016563 | TXNRD3     | 0.047025 |
| TSNARE1     | 0.001683 | IL15RA  | 0.016576 | STK26      | 0.047184 |
| RNF145      | 0.001686 | PHB2    | 0.016577 | LZTR1      | 0.047268 |
| ALKBH5      | 0.001687 | AP1AR   | 0.016624 | CCDC126    | 0.047348 |
| CPE         | 0.001688 | TSPAN1  | 0.016637 | TASP1      | 0.047357 |
| TRIB2       | 0.001708 | ZBED3   | 0.016646 | COX15      | 0.047368 |
| LNCAROD     | 0.001724 | CLBA1   | 0.016836 | TAF6       | 0.047402 |
| CD63        | 0.001728 | TMCO6   | 0.016969 | KRT10      | 0.047402 |
| RFC1        | 0.001735 | RSU1    | 0.016969 | RUNX2      | 0.047416 |
| CYLD        | 0.001735 | RBM12   | 0.016969 | TMBIM4     | 0.047454 |
| UBA2        | 0.001746 | SLC1A5  | 0.016988 | LRRC3      | 0.047476 |
| RPL29       | 0.001748 | DSN1    | 0.016998 | NEAT1      | 0.047493 |
| PAFAH1B1    | 0.001748 | AK2     | 0.016999 | FAM86C2P   | 0.047493 |
| ALS2        | 0.00177  | SCARA3  | 0.016999 | FAM72D     | 0.047501 |
| NFS1        | 0.00177  | TRIB1   | 0.016999 | FBXO9      | 0.047501 |
| TEAD1       | 0.001829 | CFAP298 | 0.017036 | CRIM1      | 0.047526 |
| TMEM159     | 0.001843 | DTD2    | 0.017111 | SLC39A4    | 0.047711 |
| ABCG1       | 0.001843 | CTC1    | 0.017111 | AP001931,2 | 0.047738 |
| ICMT        | 0.001861 | TASOR   | 0.01715  | CRTAP      | 0.04781  |
| NDUFA8      | 0.001861 | PTBP3   | 0.017205 | CENPL      | 0.047827 |
| CES2        | 0.001861 | SRC     | 0.017205 | NAT14      | 0.047917 |
| SIRT7       | 0.001881 | CYSRT1  | 0.017339 | BSPRY      | 0.047956 |
| TAF9B       | 0.001881 | VPS33B  | 0.017368 | C18orf32   | 0.047956 |
| CDC25A      | 0.001932 | MIS18A  | 0.017455 | SIRT6      | 0.047988 |
| SLC29A2     | 0.001937 | CCNG2   | 0.017462 | RABEPK     | 0.048021 |
| ACOX1       | 0.001937 | SMARCB1 | 0.017462 | RPL7L1     | 0.048057 |
| EPB41L1     | 0.001937 | LSR     | 0.017471 | CDC42BPA   | 0.048235 |
| PAQR4       | 0.001944 | NECAB1  | 0.017472 | TMEM129    | 0.048235 |
| MRPS12      | 0.001945 | ZNF511  | 0.017537 | EFNB2      | 0.048237 |
| ARL4A       | 0.001955 | TRPM6   | 0.017594 | DENND6B    | 0.048319 |

|         |          |              |          |          |          |
|---------|----------|--------------|----------|----------|----------|
| MAPKAP1 | 0.001955 | CDK8         | 0.017605 | LMAN2    | 0.048475 |
| KATNAL1 | 0.001955 | SLC16A6      | 0.017815 | TUBB6    | 0.048475 |
| ZNF695  | 0.001969 | ZNF420       | 0.01787  | ATP6V0D1 | 0.048582 |
| ATP2B1  | 0.00198  | PSMF1        | 0.017924 | ABCC10   | 0.048694 |
| FAM174A | 0.001985 | KIAA0513     | 0.017947 | CBX8     | 0.04871  |
| VAT1    | 0.001994 | BRAT1        | 0.017957 | ATP5PO   | 0.048761 |
| SEMA4A  | 0.00201  | TOLLIP       | 0.017957 | SNX2     | 0.048823 |
| PYCR3   | 0.00201  | CST3         | 0.018017 | DEXI     | 0.048836 |
| PCNX4   | 0.002011 | EPB41L4A-AS1 | 0.01806  | C8orf82  | 0.048874 |
| FOXJ2   | 0.002016 | SLC35A2      | 0.018191 | NUMBL    | 0.048893 |
| MKNK2   | 0.002017 | HMGNA4       | 0.018217 | GOLGA8A  | 0.049279 |
| ERCC6L  | 0.002017 | C8orf33      | 0.018255 | OGFRP1   | 0.049282 |
| CEP78   | 0.002026 | MIR9-3HG     | 0.018255 | E2F2     | 0.04935  |
| INO80E  | 0.002074 | ZNF551       | 0.018255 | COX7C    | 0.049355 |
| DAB2IP  | 0.002092 | DLG5         | 0.018328 | KIF27    | 0.04942  |
| EEF1B2  | 0.002094 | CEP295       | 0.018353 | GNG10    | 0.049424 |
| DEPDC1B | 0.002103 | ZFYVE1       | 0.018491 | ETV3     | 0.049669 |
| CIAO3   | 0.002108 | XXYLT1       | 0.018547 | ADD1     | 0.049752 |
| RELT    | 0.002138 | NDUFS4       | 0.018547 | HECA     | 0.049894 |
| ZGRF1   | 0.002149 | AADAT        | 0.018575 | CDC37    | 0.049929 |
| FOXO3   | 0.002157 | EPB41L2      | 0.018575 | COQ8A    | 0.049942 |
| FIS1    | 0.002162 | RPL24        | 0.018639 | MYEOV    | 0.049942 |
|         |          |              |          | WDR73    | 0.049982 |



**Table S10:** E2F/DREAM targets associated with transcriptional clusters 1, 2 and 3

| Cluster | Gene name | DREAM target | Cluster | Gene name | DREAM target | Cluster | Gene name | DREAM target |
|---------|-----------|--------------|---------|-----------|--------------|---------|-----------|--------------|
| 1       | ARHGAP11A | yes          | 2       | ANLN      | yes          | 3       | BAZ1B     | yes          |
| 1       | ARHGAP19  | yes          | 2       | APOBEC3B  | yes          | 3       | BCLAF1    | yes          |
| 1       | ASPM      | yes          | 2       | ATAD2     | yes          | 3       | BIRC5     | yes          |
| 1       | ATAD5     | yes          | 2       | BRCA1     | yes          | 3       | BRIX1     | yes          |
| 1       | AURKA     | yes          | 2       | BRIP1     | yes          | 3       | CCSAP     | yes          |
| 1       | AURKB     | yes          | 2       | C18orf54  | yes          | 3       | CDC25A    | yes          |
| 1       | BLM       | yes          | 2       | CASP8AP2  | yes          | 3       | CDR2      | yes          |
| 1       | BRCA2     | yes          | 2       | CDC25C    | yes          | 3       | DBF4      | yes          |
| 1       | BUB1      | yes          | 2       | CDK2      | yes          | 3       | FAM72D    | yes          |
| 1       | BUB1B     | yes          | 2       | CDK5RAP2  | yes          | 3       | FKBP5     | yes          |
| 1       | C4orf46   | yes          | 2       | CENPU     | yes          | 3       | GABPB1    | yes          |
| 1       | CCNA2     | yes          | 2       | CEP295    | yes          | 3       | GPD2      | yes          |
| 1       | CCNB1     | yes          | 2       | CIT       | yes          | 3       | IFRD1     | yes          |
| 1       | CCNF      | yes          | 2       | CKAP2     | yes          | 3       | ILF3      | yes          |
| 1       | CDC20     | yes          | 2       | CKAP2L    | yes          | 3       | JADE1     | yes          |
| 1       | CDC25B    | yes          | 2       | CLSPN     | yes          | 3       | LBR       | yes          |
| 1       | CDC45     | yes          | 2       | DCLRE1A   | yes          | 3       | MIS18A    | yes          |
| 1       | CDC6      | yes          | 2       | DGCR8     | yes          | 3       | PLK1      | yes          |
| 1       | CDCA2     | yes          | 2       | DHFR      | yes          | 3       | POLR3K    | yes          |
| 1       | CDCA5     | yes          | 2       | DHTKD1    | yes          | 3       | RAD18     | yes          |
| 1       | CDCA8     | yes          | 2       | DIAPH3    | yes          | 3       | RAD23A    | yes          |
| 1       | CDK1      | yes          | 2       | DSN1      | yes          | 3       | RCC1      | yes          |
| 1       | CDT1      | yes          | 2       | DTL       | yes          | 3       | RFC3      | yes          |
| 1       | CENPA     | yes          | 2       | E2F2      | yes          | 3       | RNPS1     | yes          |
| 1       | CENPE     | yes          | 2       | ECT2      | yes          | 3       | SKA3      | yes          |
| 1       | CENPF     | yes          | 2       | FAM111A   | yes          | 3       | SLBP      | yes          |
| 1       | CENPJ     | yes          | 2       | FAM111B   | yes          | 3       | SMCHD1    | yes          |
| 1       | CENPL     | yes          | 2       | FANCD2    | yes          | 3       | SRSF2     | yes          |
| 1       | CENPO     | yes          | 2       | FANCE     | yes          | 3       | SYNCRIP   | yes          |
| 1       | CEP55     | yes          | 2       | FANCG     | yes          | 3       | TCEA1     | yes          |
| 1       | CHAF1A    | yes          | 2       | GEN1      | yes          | 3       | THOC1     | yes          |
| 1       | CHEK1     | yes          | 2       | GPSM2     | yes          | 3       | TMEM109   | yes          |
| 1       | CIP2A     | yes          | 2       | GTSE1     | yes          | 3       | UNG       | yes          |
| 1       | CKAP5     | yes          | 2       | HJURP     | yes          | 3       | ZNF695    | yes          |
| 1       | CTCF      | yes          | 2       | HNRNPF    | yes          | 3       | CYP1B1    |              |
| 1       | DCLRE1B   | yes          | 2       | IQGAP3    | yes          | 3       | HSPA1B    |              |
| 1       | DDIAS     | yes          | 2       | KIF18A    | yes          | 3       | NFKB1     |              |
| 1       | DEPDC1    | yes          | 2       | KIF24     | yes          | 3       | ELOVL6    |              |
| 1       | DEPDC1B   | yes          | 2       | KIF2C     | yes          | 3       | MTMR12    |              |
| 1       | DLGAP5    | yes          | 2       | KIFC1     | yes          | 3       | RBM39     |              |
| 1       | DNAJC9    | yes          | 2       | KNL1      | yes          | 3       | DOCK7     |              |
| 1       | DNMT1     | yes          | 2       | KNTC1     | yes          | 3       | ANKLE2    |              |
| 1       | DNMT3B    | yes          | 2       | LRRCC1    | yes          | 3       | CEBPB     |              |
| 1       | E2F1      | yes          | 2       | MCM5      | yes          | 3       | TRMT61B   |              |

|   |          |     |   |            |     |   |         |
|---|----------|-----|---|------------|-----|---|---------|
| 1 | ERCC6L   | yes | 2 | MRE11      | yes | 3 | TRIM25  |
| 1 | ESCO2    | yes | 2 | NDC80      | yes | 3 | FOXN3   |
| 1 | ESPL1    | yes | 2 | NUSAP1     | yes | 3 | AIF1L   |
| 1 | EXO1     | yes | 2 | PARP2      | yes | 3 | TAP2    |
| 1 | EZH2     | yes | 2 | POLA2      | yes | 3 | TMC5    |
| 1 | FAM83D   | yes | 2 | POLD3      | yes | 3 | TARS2   |
| 1 | FANCA    | yes | 2 | PRIM2      | yes | 3 | AP1AR   |
| 1 | FANCI    | yes | 2 | PSRC1      | yes | 3 | MAP3K5  |
| 1 | FBXO5    | yes | 2 | RECQL4     | yes | 3 | ZIC2    |
| 1 | FEN1     | yes | 2 | RFC4       | yes | 3 | OSBPL6  |
| 1 | G2E3     | yes | 2 | RRM1       | yes | 3 | NUDT4   |
| 1 | GAS2L3   | yes | 2 | RRM2       | yes | 3 | NR1D2   |
| 1 | GINS1    | yes | 2 | SLF2       | yes | 3 | ZIC5    |
| 1 | GINS2    | yes | 2 | SP1        | yes | 3 | SMAGP   |
| 1 | GMNN     | yes | 2 | SPC25      | yes | 3 | SLC19A2 |
| 1 | HASPIN   | yes | 2 | STAT1      | yes | 3 | TYRO3   |
| 1 | HMMR     | yes | 2 | STIL       | yes | 3 | TTL     |
| 1 | INCENP   | yes | 2 | TCF19      | yes | 3 | TRIM14  |
| 1 | KIF11    | yes | 2 | TK1        | yes | 3 | ERLIN1  |
| 1 | KIF14    | yes | 2 | TONSL      | yes | 3 | YY1     |
| 1 | KIF15    | yes | 2 | TOP2A      | yes | 3 | ZNF496  |
| 1 | KIF18B   | yes | 2 | TRIM45     | yes | 3 | AXIN1   |
| 1 | KIF20A   | yes | 2 | UBR7       | yes | 3 | USP7    |
| 1 | KIF20B   | yes | 2 | USP37      | yes | 3 | ZBTB2   |
| 1 | KIF23    | yes | 2 | WDR76      | yes | 3 | MCMBP   |
| 1 | KIF4A    | yes | 2 | ZGRF1      | yes | 3 | REPS1   |
| 1 | LIN54    | yes | 2 | ZNF100     | yes | 3 | YJU2    |
| 1 | LMNB1    | yes | 2 | ZNF714     | yes | 3 | MRPS34  |
| 1 | MASTL    | yes | 2 | ZWINT      | yes | 3 | GSPT1   |
| 1 | MCM10    | yes | 2 | DEDD       |     | 3 | MRPL9   |
| 1 | MCM2     | yes | 2 | MACROD1    |     | 3 | BRMS1   |
| 1 | MCM4     | yes | 2 | TMOD1      |     | 3 | THAP11  |
| 1 | MCM6     | yes | 2 | ACAP3      |     | 3 | POLR3C  |
| 1 | MCM7     | yes | 2 | ASAP2      |     | 3 | POLR3F  |
| 1 | MDC1     | yes | 2 | QKI        |     | 3 | NGDN    |
| 1 | MIS18BP1 | yes | 2 | RELB       |     | 3 | UBA2    |
| 1 | MKI67    | yes | 2 | PHACTR2    |     | 3 | AVPI1   |
| 1 | MMS22L   | yes | 2 | TACC1      |     | 3 | PRPS1   |
| 1 | MSH2     | yes | 2 | FUT9       |     | 3 | EIF5    |
| 1 | NCAPG    | yes | 2 | GPRIN1     |     | 3 | CDK8    |
| 1 | NCAPG2   | yes | 2 | ZNF430     |     | 3 | RSL1D1  |
| 1 | NCAPH    | yes | 2 | TLN2       |     | 3 | ZNF639  |
| 1 | NEIL3    | yes | 2 | IKBKE      |     | 3 | FBXO45  |
| 1 | NEK2     | yes | 2 | CNP        |     | 3 | PPP2CA  |
| 1 | NEMP1    | yes | 2 | MINDY2     |     | 3 | FAM53B  |
| 1 | NPAT     | yes | 2 | AC004943.2 |     | 3 | BCL2L11 |
| 1 | NUP50    | yes | 2 | CENPI      |     | 3 | GNL3LP1 |

|   |            |     |   |           |   |        |
|---|------------|-----|---|-----------|---|--------|
| 1 | ORC1       | yes | 2 | LIG1      | 3 | FCF1   |
| 1 | PBK        | yes | 2 | PTPRG-AS1 | 3 | FAM72A |
| 1 | PKMYT1     | yes | 2 | AMOTL2    | 3 | FAM72B |
| 1 | PLK4       | yes | 2 | WWC3      | 3 | PHGDH  |
| 1 | POLA1      | yes | 2 | PCDH1     | 3 | LINGO1 |
| 1 | PRC1       | yes | 2 | RAB27B    | 3 | SIRT1  |
| 1 | PRIM1      | yes | 2 | SLX4IP    | 3 | SF3A1  |
| 1 | PSIP1      | yes | 2 | EFCAB11   | 3 | SRSF4  |
| 1 | RACGAP1    | yes | 2 | TAF9B     |   |        |
| 1 | RAD51      | yes | 2 | H1-0      |   |        |
| 1 | RAD54L     | yes | 2 | SRGAP2C   |   |        |
| 1 | RBL1       | yes | 2 | SRGAP2B   |   |        |
| 1 | RFC5       | yes | 2 | SORBS3    |   |        |
| 1 | RFWD3      | yes | 2 | CDKN2B    |   |        |
| 1 | RTTN       | yes | 2 | EFNB2     |   |        |
| 1 | SGO1       | yes | 2 | NEDD9     |   |        |
| 1 | SHCBP1     | yes | 2 | VGLL1     |   |        |
| 1 | SKA1       | yes | 2 | HELZ2     |   |        |
| 1 | SLF1       | yes | 2 | NEURL1B   |   |        |
| 1 | SMC1A      | yes | 2 | SOWAHC    |   |        |
| 1 | SMC2       | yes | 2 | SCARA3    |   |        |
| 1 | SMC3       | yes | 2 | TP53I11   |   |        |
| 1 | SMC4       | yes | 2 | RASGRP1   |   |        |
| 1 | SPAG5      | yes | 2 | KRT81     |   |        |
| 1 | TACC3      | yes | 2 | JDP2      |   |        |
| 1 | TICRR      | yes | 2 | RHOU      |   |        |
| 1 | TMEM209    | yes | 2 | TRGC1     |   |        |
| 1 | TMPO       | yes | 2 | PAQR4     |   |        |
| 1 | TPX2       | yes | 2 | HERC6     |   |        |
| 1 | TROAP      | yes | 2 | TRIM21    |   |        |
| 1 | TTI1       | yes | 2 | ZNF362    |   |        |
| 1 | TTK        | yes | 2 | C5        |   |        |
| 1 | UBE2C      | yes | 2 | DAB2IP    |   |        |
| 1 | UHRF1      | yes | 2 | FBXL3     |   |        |
| 1 | USP1       | yes | 2 | HPS3      |   |        |
| 1 | WDHD1      | yes | 2 | FOXO3     |   |        |
| 1 | ZNF367     | yes | 2 | SIDT1     |   |        |
| 1 | ZNF473     | yes | 2 | FHDC1     |   |        |
| 1 | BRD1       |     | 2 | PDE4DIP   |   |        |
| 1 | PPFIA1     |     | 2 | TIA1      |   |        |
| 1 | EHD4       |     | 2 | NCOA2     |   |        |
| 1 | SMARCB1    |     | 2 | SYNE2     |   |        |
| 1 | FAM168B    |     | 2 | ESAM      |   |        |
| 1 | VAPB       |     | 2 | ARHGEF2   |   |        |
| 1 | AC239868.1 |     | 2 | PKN3      |   |        |
| 1 | LUC7L2     |     | 2 | ETV3      |   |        |
| 1 | MAPK9      |     | 2 | NEDD4     |   |        |

|   |          |   |           |
|---|----------|---|-----------|
| 1 | NRF1     | 2 | HIP1      |
| 1 | ARHGEF26 | 2 | PTPN14    |
| 1 | RBBP5    | 2 | DNAJB1    |
| 1 | UBTF     | 2 | ZNF410    |
| 1 | OSBPL11  | 2 | CSNK1A1   |
| 1 | NR4A3    | 2 | FUT4      |
| 1 | FEM1B    | 2 | DHRS2     |
| 1 | TET3     | 2 | ZBTB21    |
| 1 | ZNF106   | 2 | TAF6      |
| 1 | ZNF704   | 2 | RAB11FIP1 |
| 1 | B3GNT10  | 2 | TJP1      |
| 1 | C1orf198 | 2 | PCM1      |
| 1 | NCOA7    | 2 | ZNF318    |
| 1 | ZNF860   | 2 | PPP2R5D   |
| 1 | SF3B2    | 2 | NHSL1     |
| 1 | HUNK     | 2 | RLF       |
| 1 | CHAF1B   | 2 | ZBTB8A    |
| 1 | ERI2     | 2 | TRIM16L   |
